# Supplementary material for: microTrait: A Toolset for a Trait-Based Representation of Microbial Genomes
Source: Front Bioinform. 2022 Jul 22;2:918853. doi: 10.3389/fbinf.2022.918853 (PMC9580909; doi:10.3389/fbinf.2022.918853)
Supplement: Supplementary file 4 [file Table1.XLSX]

## Sheet: ST1.mictotrait
			ECOLOGICAL FUNCTION
			RESOURCE ACQUISITION
			Substrate Uptake																																							Substrate Degradation
																																										Complex Carbohydrate Depolymerization						Simple Compound Degradation
TRAITS	LEVEL I		Aromatic acid transport	Biopolymer transport	Carbohydrate transport										Carboxylate transport			Free amino acids transport	Ion transport		Lipid transport		N compound transport							Nucleic acid component transport				Organophosphorus transport	Osmolyte transport	Other transport	Peptide transport	S compound transport	Secondary metabolite transport (siderophore-based)	Vitamin transport		mixed linkage glucan breakdown	xylan/heteroxylan breakdown	xyloglucan breakdown	cellulose breakdown	heteromannan breakdown	chitin breakdown	Protein Degradation	Carbohydrate Degradation
	LEVEL II				Amino sugar transport	Carbohydrate acid transport	Carbohydrate derivative transport	Carbohydrate phosphate transport	Monosaccharide transport	Oligosaccharide transport			Polysaccharide transport	Sugar alcohol transport	Monocarboxylate transport	Dicarboxylate transport	Tricarboxylate transport		Inorganic ion transport	Metal ion transport	Cell membrane lipid transport	Lipid precursor transport	Amide transport	Ammonium transport	Nitrate transport	Nitrite transport	Nitrogen transport	Urea transport	Uric acid transport	Nucleobase transport	Nucleoside transport	Nucleotide transport	Ribonucleoside transport	Organophosphorus transport	Osmolyte transport	Other transport	Peptide transport	S compound transport	Secondary metabolite transport (siderophore-based)	Vitamin B transport	Vitamin C transport
	LEVEL III									Disaccharide transport	Trisaccharide transport	Tetrasaccharide transport
GENOME DERIVED FEATURES			Membrane transport proteins: linked to their substrates and hierarchically organized by chemical class																																							Carbohydrate active enzymes						proteases	Degradation pathways
REFERENCES			see ST8
[truncated: 35 more columns]

## Sheet: ST2.microtrait_hmms
microtrait_hmm-name	microtrait_hmm-dbxref_kegg	microtrait_hmm-dbxref_ec	microtrait_hmm-dbxref_TCDB	microtrait_hmm-description	microtrait_hmm-notes
4hbl_arch	K18593	6.2.1.56		4-hydroxybutyrate---CoA ligase (ADP-forming) [EC:6.2.1.56]
4hbl1	K18861	6.2.1.40		4-hydroxybutyrate---CoA ligase (AMP-forming) [EC:6.2.1.40]
4hbl2	K14467	6.2.1.40		4-hydroxybutyrate---CoA ligase (AMP-forming) [EC:6.2.1.40]
4hbl3	K14466	6.2.1.40		4-hydroxybutyrate---CoA ligase (AMP-forming) [EC:6.2.1.40]
aaeB	K03468		2.A.85.1.2	p-hydroxybenzoic acid efflux pump subunit AaeB
aapJ	K09969		3.A.1.3.18_Q8YPM9;3.A.1.3.26_P45766;3.A.1.3.7_Q52663;3.A.1.3.8_Q52812	general L-amino acid transport system substrate-binding protein
aapM	K09971		3.A.1.3.18_Q8YPM7;3.A.1.3.26_P45768;3.A.1.3.7_Q52665;3.A.1.3.8_Q52814	general L-amino acid transport system permease protein
aapP	K09972	3.6.3.-	3.A.1.3.16_A3ZI83;3.A.1.3.26_P45769;3.A.1.3.7_Q52666;3.A.1.3.8_Q52815	general L-amino acid transport system ATP-binding protein [EC:3.6.3.-]
aapQ	K09970		3.A.1.3.18_Q8YPM8;3.A.1.3.26_P45767;3.A.1.3.7_Q52664;3.A.1.3.8_Q52813	general L-amino acid transport system permease protein
abcB	K06147		3.A.1.106.14_P73239;3.A.1.106.15_Q0P9C4;3.A.1.21.1_Q9R7V3;3.A.1.21.1_Q9Z375	ATP-binding cassette, subfamily B, bacterial
abfD	K14534	4.2.1.120;5.3.3.3		4-hydroxybutyryl-CoA dehydratase / vinylacetyl-CoA-Delta-isomerase [EC:4.2.1.120 5.3.3.3]
abgT	K12942		2.A.68.1.1_P46133;2.A.68.1.3_D9QJW1;2.A.68.1.4_Q0VR69	aminobenzoyl-glutamate transport protein
accA	K01962	6.4.1.2;2.1.3.15		acetyl-CoA carboxylase carboxyl transferase subunit alpha [EC:6.4.1.2 2.1.3.15]
accC	K01961	6.4.1.2;6.3.4.14		acetyl-CoA carboxylase, biotin carboxylase subunit [EC:6.4.1.2 6.3.4.14]
accD	K01963	6.4.1.2;2.1.3.15		acetyl-CoA carboxylase carboxyl transferase subunit beta [EC:6.4.1.2 2.1.3.15]
accD6	K18472	6.4.1.2;6.4.1.3;2.1.3.15		acetyl-CoA/propionyl-CoA carboxylase carboxyl transferase subunit [EC:6.4.1.2 6.4.1.3 2.1.3.15]
acdA	K01905	6.2.1.13		acdA; acetate---CoA ligase (ADP-forming) subunit alpha [EC:6.2.1.13]
acdB	K22224	6.2.1.13		acdB; acetate---CoA ligase (ADP-forming) subunit beta [EC:6.2.1.13]
aceA	K01637	4.1.3.1		isocitrate lyase [EC:4.1.3.1]
aceB	K01638	2.3.3.9		aceB, glcB; malate synthase [EC:2.3.3.9]
aceE	K00163	1.2.4.1		aceE; pyruvate dehydrogenase E1 component [EC:1.2.4.1]
ackA	K00925	2.7.2.1		ackA; acetate kinase [EC:2.7.2.1]
aclA	K15230	2.3.3.8		ATP-citrate lyase alpha-subunit [EC:2.3.3.8]
aclB	K15231	2.3.3.8		ATP-citrate lyase beta-subunit [EC:2.3.3.8]
aclSlarge	K01652	2.2.1.6		acetolactate synthase I/II/III large subunit [EC:2.2.1.6]
aclSsmall_1	K01653	2.2.1.6		acetolactate synthase I/III small subunit [EC:2.2.1.6]
aclSsmall_2	K11258	2.2.1.6		acetolactate synthase II small subunit [EC:2.2.1.6]
acly	K01648	2.3.3.8		ATP citrate (pro-S)-lyase [EC:2.3.3.8]
acnA	K01681	4.2.1.3		aconitate hydratase [EC:4.2.1.3]
acnB	K01682	4.2.1.3;4.2.1.99		aconitate hydratase 2 / 2-methylisocitrate dehydratase [EC:4.2.1.3 4.2.1.99]
acpA	K01114	3.1.4.3		phospholipase C [EC:3.1.4.3]
acr	K15020	1.3.1.84		acryloyl-coenzyme A reductase [EC:1.3.1.84]
acr-hydt	K14469	1.3.1.84;4.2.1.116;6.2.1.36		acrylyl-CoA reductase (NADPH) / 3-hydroxypropionyl-CoA dehydratase / 3-hydroxypropionyl-CoA synthetase [EC:1.3.1.84 4.2.1.116 6.2.1.36]
acrD	K18324		2.A.6.2.7_P24177	multidrug efflux pump
acrF	K18142		2.A.6.2.2_P31224	multidrug efflux pump
acsB	K14138	2.3.1.169		acetyl-CoA synthase [EC:2.3.1.169]
acsC	K00197	2.1.1.245		acetyl-CoA decarbonylase/synthase, CODH/ACS complex subunit gamma [EC:2.1.1.245]
acsD	K00194	2.1.1.245		acetyl-CoA decarbonylase/synthase, CODH/ACS complex subunit delta [EC:2.1.1.245]
acsE	K15023	2.1.1.258		5-methyltetrahydrofolate corrinoid/iron sulfur protein methyltransferase [EC:2.1.1.258]
acss	K01895	6.2.1.1		acetyl-CoA synthetase [EC:6.2.1.1]
actP	K14393		2.A.21.7.2_P32705;2.A.21.7.3_Q8NS49;2.A.21.7.4_D5AU53;2.A.21.7.5_D5APM1	cation/acetate symporter
adc	K01574	4.1.1.4		acetoacetate decarboxylase [EC:4.1.1.4]
adeB	K18146		2.A.6.2.40	multidrug efflux pump
adeC	K18147		1.B.17;2.A.6.2.40	outer membrane protein, multidrug efflux system
adeK	K18139		2.A.6.2.5_Q51006;2.A.6.2.9_Q9WWZ8;2.A.6.2.23_Q6VV67	outer membrane protein, multidrug efflux system
adh	K00001	1.1.1.1		E1.1.1.1, adh; alcohol dehydrogenase [EC:1.1.1.1]
adhE	K04072	1.2.1.10;1.1.1.1		adhE; acetaldehyde dehydrogenase / alcohol dehydrogenase [EC:1.2.1.10 1.1.1.1]
adhP	K13953	1.1.1.1		adhP; alcohol dehydrogenase, propanol-preferring [EC:1.1.1.1]
adiA	K01584	4.1.1.19		arginine decarboxylase [EC:4.1.1.19]
adiC	K03759		2.A.3.2.5_P60061	arginine:agmatine antiporter
adpgk	K08074	2.7.1.147		ADPGK; ADP-dependent glucokinase [EC:2.7.1.147]
afuA	K02012		3.A.1.20.2_Q9KLQ7;3.A.1.10.4_Q82VN7;3.A.1.10.5_Q56925	iron(III) transport system substrate-binding protein
afuB	K02011		3.A.1.20.2_Q9KLQ6;3.A.1.10.4_Q82VN6;3.A.1.10.5_Q56926	iron(III) transport system permease protein
afuC	K02010	3.6.3.30	3.A.1.1.14_Q97UF2;3.A.1.20.2_Q9KLQ5;3.A.1.10.4_Q82VN5;3.A.1.10.5_A1JLH0;3.A.1.19.2_Q73RE4	iron(III) transport system ATP-binding protein [EC:3.6.3.30]
agaEIIA	K02744	2.7.1.69	4.A.6.1.14_Q8DR78;4.A.6.1.23_C1A8G0	PTS system, N-acetylgalactosamine-specific IIA component [EC:2.7.1.69]
agaEIIB	K02745	2.7.1.69	4.A.6.1.14_Q8DR76;4.A.6.1.4_Q9KIQ4	PTS system, N-acetylgalactosamine-specific IIB component [EC:2.7.1.69]
agaEIIC	K02746		4.A.6.1.14_Q8DR75;4.A.6.1.4_Q9KIQ3;4.A.6.1.9_Q97N93	PTS system, N-acetylgalactosamine-specific IIC component
agaEIID	K02747		4.A.6.1.14_Q8DR74;4.A.6.1.20_H1XXZ1;4.A.6.1.4_Q9KIQ2	PTS system, N-acetylgalactosamine-specific IID component
aglE	K10232		3.A.1.1.32_Q55471;3.A.1.1.8_Q9Z3R5	alpha-glucoside transport system substrate-binding protein
aglF	K10233		3.A.1.1.32_Q55472;3.A.1.1.8_Q9Z3R6	alpha-glucoside transport system permease protein
aglG	K10234		3.A.1.1.32_Q55473;3.A.1.1.8_Q9Z3R7	alpha-glucoside transport system permease protein
aglK	K10235		3.A.1.1.17_Q9R9Q4;3.A.1.1.4_Q01937;3.A.1.1.8_Q9Z3R9	alpha-glucoside transport system ATP-binding protein
aguE	K17241		3.A.1.1.39	alpha-1,4-digalacturonate transport system substrate-binding protein
aguF	K17242		3.A.1.1.39	alpha-1,4-digalacturonate transport system permease protein
aguG	K17243		3.A.1.1.39	alpha-1,4-digalacturonate transport system permease protein
agxt	K00830	2.6.1.44;2.6.1.45;2.6.1.51		alanine-glyoxylate transaminase / serine-glyoxylate transaminase / serine-pyruvate transaminase [EC:2.6.1.44 2.6.1.45 2.6.1.51]
ahpC_1	K03386	1.11.1.24		peroxiredoxin 2/4 [EC:1.11.1.24]	1
ahpC_2	K24119	1.11.1.26		NADH-dependent peroxiredoxin subunit C [EC:1.11.1.26]
ahpC_3	K24126	1.11.1.28		lipoyl-dependent peroxiredoxin subunit C [EC:1.11.1.28]
ahpF	K03387	1.8.1.-		NADH-dependent peroxiredoxin subunit F [EC:1.8.1.-]	1
ahy	K20625	4.2.1.112		acetylene hydratase [EC:4.2.1.112]
aksA	K10977	2.3.3.14;2.3.3.-		methanogen homocitrate synthase [EC:2.3.3.14 2.3.3.-]
aksD	K16792	4.2.1.114		methanogen homoaconitase large subunit [EC:4.2.1.114]
aksE	K16793	4.2.1.114		methanogen homoaconitase small subunit [EC:4.2.1.114]
aksF	K10978	1.1.1.87;1.1.1.-		methanogen homoisocitrate dehydrogenase [EC:1.1.1.87 1.1.1.-]
aldh	K00128	1.2.1.3		ALDH; aldehyde dehydrogenase (NAD+) [EC:1.2.1.3]
aldh7A1	K14085	1.2.1.31;1.2.1.8;1.2.1.3		ALDH7A1; aldehyde dehydrogenase family 7 member A1 [EC:1.2.1.31 1.2.1.8 1.2.1.3]
aldo.classI-1	K01623	4.1.2.13		fructose-bisphosphate aldolase, class I [EC:4.1.2.13]
aldo.classI-2	K11645	4.1.2.13		fructose-bisphosphate aldolase, class I [EC:4.1.2.13]
aldo.classII	K01624	4.1.2.13		fructose-bisphosphate aldolase, class II [EC:4.1.2.13]
alg8	K19290	2.4.1.33	4.D.1.1.7;4.D.1.1.9	mannuronan synthase [EC:2.4.1.33]
alg44	K19291	2.4.1.33		mannuronan synthase [EC:2.4.1.33]
algK	K19292			alginate biosynthesis protein AlgK
algE	K16081		1.B.13.1.1_P18895;1.B.13.1.2_Q44497;1.B.13.1.7_Q0VSL2	alginate production protein
algG	K01795	5.1.3.37		mannuronan 5-epimerase [EC:5.1.3.37]
algX	K19293			alginate biosynthesis protein AlgX
algL	K01729	4.2.2.3		poly(beta-D-mannuronate) lyase [EC:4.2.2.3]
algI	K19294			alginate O-acetyltransferase complex protein AlgI
algJ	K19295			alginate O-acetyltransferase complex protein AlgJ
algF	K19296			alginate O-acetyltransferase complex protein AlgF
allP	K10975		2.A.39.3.8	allantoin permease
alpha-LP	K20136	3.4.21.12		alpha-LP; alpha-lytic endopeptidase [EC:3.4.21.12]	Serine peptidases_Family S1: chymotrypsin family;S1
alsA	K10551	3.6.3.17	3.A.1.2.6_P32721	D-allose transport system ATP-binding protein [EC:3.6.3.17]
alsB	K10549		3.A.1.2.6_P39265	D-allose transport system substrate-binding protein
alsC	K10550		3.A.1.2.6_P32720	D-allose transport system permease protein
alsD	K01575	4.1.1.5		acetolactate decarboxylase [EC:4.1.1.5]
alt	K00814	2.6.1.2		alanine transaminase [EC:2.6.1.2]
ameC	K18904		1.B.17.3.1_P24145	outer membrane protein, multidrug efflux system
amiS	K22112		1.A.29.1.1;1.A.29.1.2;1.A.29.1.6	amide transporter protein
ampG	K08218		2.A.1.25.5_G3XCT7	MFS transporter, PAT family, beta-lactamase induction signal transducer AmpG
ampH	K18988	3.4.16.4 3.4.21.-		ampH; serine-type D-Ala-D-Ala carboxypeptidase/endopeptidase [EC:3.4.16.4 3.4.21.-]	Serine peptidases_Family S12: D-Ala-D-Ala carboxypeptidase B family;S12
ampS	K19689	3.4.11.-		ampS, pepS, ampT; aminopeptidase [EC:3.4.11.-]	Metallo peptidases_Family M29: aminopeptidase T family;M29
amsL	K16696		2.A.66.2.8_D4HW93	exopolysaccharide (amylovoran) exporter
amt	K03320		1.A.11	ammonium transporter, Amt family
anfG	K00531	1.18.6.1		nitrogenase delta subunit [EC:1.18.6.1]
ansP	K11738		2.A.3.1.24_P77610;2.A.3.1.8_P40812	L-asparagine permease
aotJ	K10022		3.A.1.3.11_O50181	arginine/ornithine transport system substrate-binding protein
aotM	K10023		3.A.1.3.11_O50183	arginine/ornithine transport system permease protein
aotP	K10025	3.6.3.-	3.A.1.3.11_O30506;3.A.1.3.1_P02915;3.A.1.3.23_Q9HU32	arginine/ornithine transport system ATP-binding protein [EC:3.6.3.-]
aotQ	K10024		3.A.1.3.11_O50182	arginine/ornithine transport system permease protein
apa1_2	K00988	2.7.7.5;2.7.7.53		sulfate adenylyltransferase (ADP) / ATP adenylyltransferase [EC:2.7.7.5 2.7.7.53]
apcA	K02092			allophycocyanin alpha subunit
apcB	K02093			allophycocyanin beta subunit
apcC	K02094			phycobilisome core linker protein
apcD	K02095			allophycocyanin-B
apcE	K02096			phycobilisome core-membrane linker protein
apcF	K02097			phycobilisome core component
apgM	K15635	5.4.2.12		2,3-bisphosphoglycerate-independent phosphoglycerate mutase [EC:5.4.2.12]
aphA	K03788	3.1.3.2		acid phosphatase (class B) [EC:3.1.3.2]
appA	K01093	3.1.3.26;3.1.3.2		4-phytase / acid phosphatase [EC:3.1.3.26 3.1.3.2]
appX	K22501	7.1.1.7		cytochrome bd-II ubiquinol oxidase subunit AppX [EC:7.1.1.7]
aprA	K00394	1.8.99.2		adenylylsulfate reductase, subunit A [EC:1.8.99.2]
aprB	K00395	1.8.99.2		adenylylsulfate reductase, subunit B [EC:1.8.99.2]
aprE1	K01342	3.4.21.62		subtilisin [EC:3.4.21.62]	Serine peptidases_Family S8: subtilisin family;S8
aprX	K17734	3.4.21.-		aprX; serine protease AprX [EC:3.4.21.-]	Serine peptidases_Family S8: subtilisin family;S8
araE	K02100		2.A.1.1.2_P0AE24;2.A.1.1.55_P96710	MFS transporter, SP family, arabinose:H+ symporter
araF	K10537		3.A.1.2.2_P02924	L-arabinose transport system substrate-binding protein
araG	K10539	3.6.3.17	3.A.1.2.2_P0AAF3	L-arabinose transport system ATP-binding protein [EC:3.6.3.17]
araH	K10538		3.A.1.2.2_P0AE26	L-arabinose transport system permease protein
araJ	K08156		2.A.1.2.14_P23910	MFS transporter, DHA1 family, arabinose polymer utilization protein
araN	K17234		3.A.1.1.34_P94528	arabinosaccharide transport system substrate-binding protein
araP	K17235		3.A.1.1.34_P94529	arabinosaccharide transport system permease protein
araQ	K17236		3.A.1.1.34_P94530	arabinosaccharide transport system permease protein
arcA	K07773			two-component system, OmpR family, aerobic respiration control protein ArcA
arcB	K07648	2.7.13.3		two-component system, OmpR family, aerobic respiration control sensor histidine kinase ArcB [EC:2.7.13.3]
arcD	K03758		2.A.3.2.10_F2HL52;2.A.3.2.11_F2HL56;2.A.3.2.3_P18275;2.A.3.2.4_P35865;2.A.3.2.6_O32204;2.A.3.2.7_Q9Z6M8;2.A.3.2.8_P0AAE5	arginine:ornithine antiporter / lysine permease
arg1	K23055		3.A.1.3.23	lysine/arginine/ornithine/histidine/octopine transport system substrate-binding protein
arg2	K23056		3.A.1.3.23	lysine/arginine/ornithine/histidine/octopine transport system permease protein
arg3	K23057		3.A.1.3.23	lysine/arginine/ornithine/histidine/octopine transport system permease protein
arg4	K23058	7.4.2.1	3.A.1.3.23	lysine/arginine/ornithine/histidine/octopine transport system ATP-binding protein [EC:7.4.2.1]
argT	K10013		3.A.1.3.11_O50181;3.A.1.3.1_P09551;3.A.1.3.29_P09551;3.A.1.3.29_P0AEU0	lysine/arginine/ornithine transport system substrate-binding protein
arnE	K12962		2.A.7.22.1_Q47377	undecaprenyl phosphate-alpha-L-ara4N flippase subunit ArnE
aroP1	K16237		2.A.3.1.12_Q46065	aromatic amino acid permease
aroP2	K11734		2.A.3.1.3_P15993	aromatic amino acid transport protein AroP
arsB1	K03893		2.A.45.1;3.A.4.1	arsenical pump membrane protein
arsB2	K03325		2.A.59	arsenite transporter, ACR3 family
arsC	K00537	1.20.4.1		arsenate reductase (glutaredoxin) [EC:1.20.4.1]
arsC2	K03741	1.20.4.4		arsenate reductase (thioredoxin) [EC:1.20.4.4]
arrA		1.20.99.1		respiratory arsenate reductase large subunit
arrB		1.20.99.1		respiratory arsenate reductase small subunit
artI	K09997		3.A.1.3.3_P30859;3.A.1.3.3_P30860	arginine transport system substrate-binding protein
artJ	K09996		3.A.1.3.3_P30860	arginine transport system substrate-binding protein
artM	K09998		3.A.1.3.3_P0AE30	arginine transport system permease protein
artP1	K10000	3.6.3.-	3.A.1.3.3_P0AAF6	arginine transport system ATP-binding protein [EC:3.6.3.-]
artP2	K23059		3.A.1.3.15;3.A.1.3.27	arginine/lysine/histidine transporter system substrate-binding protein
artQ1	K09999		3.A.1.3.3_P0AE34	arginine transport system permease protein
artQ2	K17077		3.A.1.3.15;3.A.1.3.27	arginine/lysine/histidine transport system permease protein
artR	K23060	7.4.2.1	3.A.1.3.15;3.A.1.3.27	arginine/lysine/histidine transport system ATP-binding protein [EC:7.4.2.1]
ascEIIB	K02752	2.7.1.69		PTS system, arbutin-, cellobiose-, and salicin-specific IIB component [EC:2.7.1.69]
ascEIIC	K02753			PTS system, arbutin-, cellobiose-, and salicin-specific IIC component
asd1	K15017	1.2.1.75;1.2.1.76		malonyl-CoA/succinyl-CoA reductase (NADPH) [EC:1.2.1.75 1.2.1.76]
asd2	K15038	1.2.1.76		succinyl-CoA reductase [EC:1.2.1.76]
aspB	K00812	2.6.1.1		aspartate aminotransferase [EC:2.6.1.1]
aspC	K00813	2.6.1.1		aspartate aminotransferase [EC:2.6.1.1]
asrA	K16950			anaerobic sulfite reductase subunit A
asrB	K16951			anaerobic sulfite reductase subunit B
asrC	K00385			anaerobic sulfite reductase subunit C
atoA	K01035	2.8.3.9;2.8.3.8		acetate CoA/acetoacetate CoA-transferase beta subunit [EC:2.8.3.9 2.8.3.8]
atoB	K00626	2.3.1.9		acetyl-CoA C-acetyltransferase [EC:2.3.1.9]
atoD	K01034	2.8.3.9;2.8.3.8		acetate CoA/acetoacetate CoA-transferase alpha subunit [EC:2.8.3.9 2.8.3.8]
atoE	K02106		2.A.73.1.1_P76460	short-chain fatty acids transporter
atp4aalpha	K01542	7.2.2.19		H+/K+-exchanging ATPase subunit alpha [EC:7.2.2.19]
atp4abeta	K01543	7.2.2.19		H+/K+-exchanging ATPase subunit beta [EC:7.2.2.19]
atpA	K02111	7.2.2.1;7.1.2.2		F-type H+/Na+-transporting ATPase subunit alpha [EC:7.2.2.1 7.1.2.2]
atpB	K02108			F-type H+-transporting ATPase subunit a
atpC	K02114			F-type H+-transporting ATPase subunit epsilon
atpD	K02112	7.2.2.1;7.1.2.2		F-type H+/Na+-transporting ATPase subunit beta [EC:7.2.2.1 7.1.2.2]
atpE	K02110			F-type H+-transporting ATPase subunit c
atpF	K02109			F-type H+-transporting ATPase subunit b
atpG	K02115			F-type H+-transporting ATPase subunit gamma
atpH	K02113			F-type H+-transporting ATPase subunit delta
atpvaA	K02117	7.2.2.1;7.1.2.2		V/A-type H+/Na+-transporting ATPase subunit A [EC:7.2.2.1 7.1.2.2]
atpvaB	K02118			V/A-type H+/Na+-transporting ATPase subunit B
atpvaC	K02119			V/A-type H+/Na+-transporting ATPase subunit C
atpvaD	K02120			V/A-type H+/Na+-transporting ATPase subunit D
atpvaE	K02121			V/A-type H+/Na+-transporting ATPase subunit E
atpvaF	K02122			V/A-type H+/Na+-transporting ATPase subunit F
atpvaGH	K02107			V/A-type H+/Na+-transporting ATPase subunit G/H
atpvaI	K02123			V/A-type H+/Na+-transporting ATPase subunit I
atpvaK	K02124			V/A-type H+/Na+-transporting ATPase subunit K
attA1	K11080		3.A.1.11.3	mannopine transport system ATP-binding protein
attA2	K11079		3.A.1.11.3	mannopine transport system permease protein
attB	K11078		3.A.1.11.3	mannopine transport system permease protein
attC	K11077		3.A.1.11.3	mannopine transport system substrate-binding protein
avrPphB	K13440	3.4.22.-		avrPphB; cysteine protease avirulence protein AvrPphB [EC:3.4.22.-]	Cysteine peptidases_Family C58;C58
avrRpt2	K13439	3.4.22.-		avrRpt2; cysteine protease avirulence protein AvrRpt2 [EC:3.4.22.-]	Cysteine peptidases_Family C70;C70
azf	K19243	1.1.1.388		azf; NAD+ dependent glucose-6-phosphate dehydrogenase [EC:1.1.1.388]
baeR	K07664			two-component system, OmpR family, response regulator BaeR
baeS	K07642	2.7.13.3		two-component system, OmpR family, sensor histidine kinase BaeS [EC:2.7.13.3]
bamC	K07287		1.B.33.1	outer membrane protein assembly factor BamC
bapA	K20750	3.4.11.25		bapA; beta-peptidyl aminopeptidase [EC:3.4.11.25]	Mixed peptidases_Family P1: DmpA aminopeptidase family;P1
bccA	K11263			bccA, pccA; acetyl-CoA/propionyl-CoA carboxylase, biotin carboxylase, biotin carboxyl carrier protei
bccP	K02160			acetyl-CoA carboxylase biotin carboxyl carrier protein
bcd	K00248	1.3.8.1		butyryl-CoA dehydrogenase [EC:1.3.8.1]
bceA	K11631		3.A.1.134.3	bacitracin transport system ATP-binding protein
bceB	K11632		3.A.1.134.3	bacitracin transport system permease protein
bchC	K11337	1.1.1.396		bacteriochlorophyllide a dehydrogenase [EC:1.1.1.396]
bchE	K04034	1.21.98.3		anaerobic magnesium-protoporphyrin IX monomethyl ester cyclase [EC:1.21.98.3]
bchF	K11336	4.2.1.165		3-vinyl bacteriochlorophyllide hydratase [EC:4.2.1.165]
bchG	K04040	2.5.1.62;2.5.1.133		chlorophyll/bacteriochlorophyll a synthase
bchH	K03403	6.6.1.1		magnesium chelatase subunit H [EC:6.6.1.1]
bchJ	K04036	1.-.-.-		divinyl protochlorophyllide a 8-vinyl-reductase [EC:1.-.-.-]
bchK	K13605	2.5.1.-		bacteriochlorophyll c synthase
bchM	K03428	2.1.1.11		magnesium-protoporphyrin O-methyltransferase [EC:2.1.1.11]
bchP	K10960	1.3.1.83;1.3.1.111		geranylgeranyl diphosphate/geranylgeranyl-bacteriochlorophyllide a reductase [EC:1.3.1.83 1.3.1.111]
bchU	K13604	2.1.1.333		bacteriochlorophyllide d C-20 methyltransferase [EC:2.1.1.333]
bchV	K13603	4.2.1.169		3-vinyl bacteriochlorophyllide hydratase [EC:4.2.1.169]
bchX	K11333	1.3.7.14;1.3.7.15		3,8-divinyl chlorophyllide a/chlorophyllide a reductase subunit X [EC:1.3.7.14 1.3.7.15]
bchY	K11334	1.3.7.14;1.3.7.15		3,8-divinyl chlorophyllide a/chlorophyllide a reductase subunit Y [EC:1.3.7.14 1.3.7.15]
bchZ	K11335	1.3.7.14;1.3.7.15		3,8-divinyl chlorophyllide a/chlorophyllide a reductase subunit Z [EC:1.3.7.14 1.3.7.15]
bciB	K21231	1.3.7.13		3,8-divinyl protochlorophyllide a 8-vinyl-reductase (ferredoxin) [EC:1.3.7.13]
bciC	K21058	3.1.1.100		chlorophyllide a hydrolase [EC:3.1.1.100]
bciD	K21312	1.17.98.2		bacteriochlorophyllide c C-7(1)-hydroxylase [EC:1.17.98.2]
bcpA	K01003	4.1.1.112		bcpA; oxaloacetate decarboxylase [EC:4.1.1.112]
bcrA	K19309		3.A.1.131.1	bacitracin transport system ATP-binding protein
bcrB	K19310		3.A.1.131.1	bacitracin transport system permease protein
bdhAB	K00100	1.1.1.-		butanol dehydrogenase [EC:1.1.1.-]
benE	K05782		2.A.46.1	benzoate membrane transport protein
bepA	K01423	3.4.-.-		bepA; beta-barrel assembly-enhancing protease [EC:3.4.-.-]	Metallo peptidases_Family M48: Ste24 endopeptidase family;M48
betL	K05020		2.A.15.1.11_Q9X4A5;2.A.15.1.1_P54417	glycine betaine transporter
betT	K02168		2.A.15.1.3_Q4ZLW8;2.A.15.1.5_Q92WM0;2.A.15.1.9_Q6F754	choline/glycine/proline betaine transport protein
betA	K00108	1.1.99.1		choline dehydrogenase [EC:1.1.99.1]
codA	K17755	1.1.3.17		choline oxidase [EC:1.1.3.17]
gbsB	K11440	1.1.1.1		choline dehydrogenase [EC:1.1.1.1]
betB	K00130	1.2.1.8		betaine-aldehyde dehydrogenase [EC:1.2.1.8]
bfcA	K03886	1.10.2.-		menaquinol-cytochrome c reductase iron-sulfur subunit [EC:1.10.2.-]
bglEIIA	K02755	2.7.1.69		PTS system, beta-glucosides-specific IIA component [EC:2.7.1.69]
bglEIIB	K02756	2.7.1.69		PTS system, beta-glucosides-specific IIB component [EC:2.7.1.69]
bglEIIC	K02757		4.A.1.2.11_P40739;4.A.1.2.14_ART98499;4.A.1.2.15_ART98417;4.A.1.2.2_P08722;4.A.1.2.5_Q8GGK3	PTS system, beta-glucosides-specific IIC component
bglH	K10124		1.B.3.1.3_P26218	carbohydrate-specific outer membrane porin
bgtA	K17063	3.6.3.-	3.A.1.3.12_P73721	arginine/lysine/histidine/glutamine transport system ATP-binding protein [EC:3.6.3.-]
bgtB	K17062		3.A.1.3.12_P73544;3.A.1.3.17_Q8YSA2	arginine/lysine/histidine/glutamine transport system substrate-binding and permease protein
bica	K07552		2.A.1.2.7_P28246	MFS transporter, DHA1 family, bicyclomycin/chloramphenicol resistance protein
bioM	K16784	3.6.3.-	3.A.1.25.7_D5ARH0;3.A.1.25.1	biotin transport system ATP-binding protein [EC:3.6.3.-]
bioN	K16783		3.A.1.25.7_D5ARG9;3.A.1.25.1	biotin transport system permease protein
bioY	K03523		3.A.1.25.5_Q9WZQ6;3.A.1.25.7_D5ARG8	biotin transport system substrate-specific component
blpA	K20344		3.A.1.112	ATP-binding cassette, subfamily C, bacteriocin exporter
bpeE	K18901		2.A.6.2	membrane fusion protein, multidrug efflux system
bpeF	K18902		2.A.6.2	multidrug efflux pump
bpgm	K01837	5.4.2.4;5.4.2.11		BPGM; bisphosphoglycerate/phosphoglycerate mutase [EC:5.4.2.4 5.4.2.11]
bpnt	K01082	3.1.3.7		3'(2'), 5'-bisphosphate nucleotidase [EC:3.1.3.7]
bpr	K13276	3.4.21.-		bpr; bacillopeptidase F [EC:3.4.21.-]	Serine peptidases_Family S8: subtilisin family;S8
braD	K19083		3.A.1.134	bacitracin transport system ATP-binding protein
braE	K19084		3.A.1.134	bacitracin transport system permease protein
btuB	K16092		1.B.14.3.1_P06129	vitamin B12 transporter
btuC	K06073		3.A.1.13.1_P06609	vitamin B12 transport system permease protein
btuD	K06074	3.6.3.33	3.A.1.13.1_P06611	vitamin B12 transport system ATP-binding protein [EC:3.6.3.33]
btuF	K06858		3.A.1.13.1_Q8ZRP7	vitamin B12 transport system substrate-binding protein
buk	K00929	2.7.2.7		butyrate kinase [EC:2.7.2.7]
butA	K03366	1.1.1.304;1.1.1.76;1.1.1.-		meso-butanediol dehydrogenase / (S,S)-butanediol dehydrogenase / diacetyl reductase [EC:1.1.1.304 1.1.1.76 1.1.1.-]
butB	K00004	1.1.1.303;1.1.1.-;1.1.1.4		(R,R)-butanediol dehydrogenase / meso-butanediol dehydrogenase / diacetyl reductase [EC:1.1.1.303 1.1.1.- 1.1.1.4]
bxlE	K17326		3.A.1.1.21_Q9L027	xylobiose transport system substrate-binding protein
bxlF	K17327		3.A.1.1.21_Q9L026	xylobiose transport system permease protein
bxlG	K17328		3.A.1.1.21	xylobiose transport system permease protein
cadA	K01582	4.1.1.18		lysine decarboxylase [EC:4.1.1.18]
cadB	K03757			cadaverine:lysine antiporter
caiT	K05245		2.A.15.2	L-carnitine/gamma-butyrobetaine antiporter
capD	K17716	5.1.3.2		UDP-glucose 4-epimerase [EC:5.1.3.2]
carC	K22430	1.3.1.108		caffeyl-CoA reductase-Etf complex subunit CarC [EC:1.3.1.108]
carD	K22431	1.3.1.108		caffeyl-CoA reductase-Etf complex subunit CarD [EC:1.3.1.108]
carE	K22432	1.3.1.108		caffeyl-CoA reductase-Etf complex subunit CarE [EC:1.3.1.108]
carT	K17842	1.13.11.59		CAO-2; torulene dioxygenase [EC:1.13.11.59]
cbiK	K10094		3.A.1.22	nickel transport protein
cbiL	K16915			nickel transport protein
cbiM	K02007		3.A.1.18;3.A.1.22;3.A.1.23	cobalt/nickel transport system permease protein
cbiN	K02009		3.A.1.18	cobalt/nickel transport protein
cbiO	K02006		3.A.1.18;3.A.1.22;3.A.1.23	cobalt/nickel transport system ATP-binding protein
cbiQ	K02008		3.A.1.18;3.A.1.22;3.A.1.23	cobalt/nickel transport system permease protein
cbrT	K16927		3.A.1.32.1_Q9KXJ5;3.A.1.32.2_Q2NFA9;3.A.1.32.3_A9WHW7	energy-coupling factor transport system substrate-specific component
cch-hbcd	K15016	4.2.1.17;1.1.1.35		enoyl-CoA hydratase / 3-hydroxyacyl-CoA dehydrogenase [EC:4.2.1.17 1.1.1.35]
ccl	K15234	4.1.3.34		citryl-CoA lyase [EC:4.1.3.34]
ccmA	K02193	3.6.3.41	3.A.1.107	heme exporter protein A [EC:3.6.3.41]
ccmB	K02194		3.A.1.107	heme exporter protein B
ccmC	K02195		3.A.1.107	heme exporter protein C
ccmD	K02196		3.A.1.107	heme exporter protein D
ccmK	K08696			carbon dioxide concentrating mechanism protein CcmK
ccmL	K08697			carbon dioxide concentrating mechanism protein CcmL
ccmM	K08698			carbon dioxide concentrating mechanism protein CcmM
ccmN	K08699			carbon dioxide concentrating mechanism protein CcmN
ccmO	K08700			carbon dioxide concentrating mechanism protein CcmO
ccoN	K00404	1.9.3.1		cytochrome c oxidase cbb3-type subunit I [EC:1.9.3.1]
ccoNO	K15862	1.9.3.1		cytochrome c oxidase cbb3-type subunit I/II [EC:1.9.3.1]
ccoO	K00405			cytochrome c oxidase cbb3-type subunit II
ccoP	K00406			cytochrome c oxidase cbb3-type subunit III
ccoQ	K00407			cytochrome c oxidase cbb3-type subunit IV
ccrA	K17829	1.3.1.86		crotonyl-CoA reductase [EC:1.3.1.86]
ccsA	K15232	6.2.1.18		citryl-CoA synthetase large subunit [EC:6.2.1.18]
ccsB	K15233			citryl-CoA synthetase small subunit
cct	K22447			archaeal chaperonin, HSP60
cdhA	K00192	1.2.7.4		anaerobic carbon-monoxide dehydrogenase, CODH/ACS complex subunit alpha [EC:1.2.7.4]
cdhB	K00195			anaerobic carbon-monoxide dehydrogenase, CODH/ACS complex subunit epsilon
cdhC	K00193	2.3.1.169		acetyl-CoA decarbonylase/synthase, CODH/ACS complex subunit beta [EC:2.3.1.169]
cebE	K10240		3.A.1.1.23_Q9X9R7	cellobiose transport system substrate-binding protein
cebF	K10241		3.A.1.1.23_Q9X9R6	cellobiose transport system permease protein
cebG	K10242		3.A.1.1.23_Q9X9R5	cellobiose transport system permease protein
celEIIA	K02759	2.7.1.69	4.A.3.2.1_P69791;4.A.3.2.3_O50981;4.A.3.2.6_Q9KSH3;4.A.3.2.7_C4X746;4.A.3.2.9_U5MLJ3;4.A.3.2.2_P46319	PTS system, cellobiose-specific IIA component [EC:2.7.1.69]
celEIIB	K02760	2.7.1.69	4.A.3.2.1_P69795;4.A.3.2.3_O50982;4.A.3.2.5_Q8L3C3;4.A.3.2.6_Q9KSH5;4.A.3.2.7_C4X744;4.A.3.2.9_U5MIE1;4.A.3.2.2_P46318	PTS system, cellobiose-specific IIB component [EC:2.7.1.69]
celEIIC	K02761		4.A.3.2.1_P17334;4.A.3.2.3_O50980;4.A.3.2.5_Q8L3C2;4.A.3.2.6_Q9KSH4;4.A.3.2.7_C4X745;4.A.3.2.9_U5MFA1;4.A.3.2.2_P46317	PTS system, cellobiose-specific IIC component
cfa	K00574	2.1.1.79		cyclopropane-fatty-acyl-phospholipid synthase [EC:2.1.1.79]
cfrA	K16089		1.B.14.1.3_O54507;1.B.14.1.4_P17315	outer membrane receptor for ferrienterochelin and colicins
chaA	K07300		2.A.19	Ca2+:H+ antiporter
chiE	K17244		3.A.1.1.40_Q9WZR7	putative chitobiose transport system substrate-binding protein
chiF	K17245		3.A.1.1.40	putative chitobiose transport system permease protein
chiG	K17246		3.A.1.1.40	putative chitobiose transport system permease protein
chlE	K04035	1.14.13.81		magnesium-protoporphyrin IX monomethyl ester (oxidative) cyclase [EC:1.14.13.81]
chlL	K04037	1.3.7.7		light-independent protochlorophyllide reductase subunit L [EC:1.3.7.7]
chrA	K07240		2.A.51.1	chromate transporter
citA	K03288		2.A.1.6.1_P16482;2.A.1.6.7_P0A2G3	MFS transporter, MHS family, citrate/tricarballylate:H+ symporter
citC	K01910	6.2.1.22		[citrate (pro-3S)-lyase] ligase [EC:6.2.1.22]
citD	K01646			citrate lyase subunit gamma (acyl carrier protein)
citE	K01644	4.1.3.34		citrate lyase subunit beta / citryl-CoA lyase [EC:4.1.3.34]
citF	K01643	2.8.3.10		citrate lyase subunit alpha / citrate CoA-transferase [EC:2.8.3.10]
citT	K09477		2.A.47.3.2_P0AE74	citrate:succinate antiporter
clpA	K03694			ATP-dependent Clp protease ATP-binding subunit ClpA, HSP100	1
clpB	K03695			ATP-dependent Clp protease ATP-binding subunit ClpB, HSP100	1
clpC	K03696			ATP-dependent Clp protease ATP-binding subunit ClpC, HSP100	1
clpE	K03697			ATP-dependent Clp protease ATP-binding subunit ClpE, HSP100	1
clpL	K04086			ATP-dependent Clp protease ATP-binding subunit ClpL, HSP100	1
clpP	K01358	3.4.21.92		ATP-dependent Clp protease, protease subunit [EC:3.4.21.92]	Serine peptidases_Family S14: ClpP endopeptidase family;S14
clpX	K03544			ATP-dependent Clp protease ATP-binding subunit ClpX, HSP100	1
cmlA	K18552		2.A.1.2.3_P32482	MFS transporter, DHA1 family, florfenicol/chloramphenicol resistance protein
cmpA	K11950		3.A.1.16.3	bicarbonate transport system substrate-binding protein
cmpB	K11951		3.A.1.16.3	bicarbonate transport system permease protein
cmpC	K11952	3.6.3.-	3.A.1.16.3	bicarbonate transport system ATP-binding protein [EC:3.6.3.-]
cmpD	K11953	3.6.3.-	3.A.1.16.3	bicarbonate transport system ATP-binding protein [EC:3.6.3.-]
codB	K10974		2.A.39.1.1_P0AA82	cytosine permease
cofC	K14941	2.7.7.68		2-phospho-L-lactate guanylyltransferase [EC:2.7.7.68]
cofD	K11212	2.7.8.28		LPPG:FO 2-phospho-L-lactate transferase [EC:2.7.8.28]
cofE	K12234	6.3.2.31;6.3.2.34		coenzyme F420-0:L-glutamate ligase / coenzyme F420-1:gamma-L-glutamate ligase [EC:6.3.2.31 6.3.2.34]
cofF	K14940	6.3.2.32		gamma-F420-2:alpha-L-glutamate ligase [EC:6.3.2.32]
cofG	K11780	4.3.1.32		7,8-didemethyl-8-hydroxy-5-deazariboflavin synthase [EC:4.3.1.32]
cofH	K11781	2.5.1.147		5-amino-6-(D-ribitylamino)uracil---L-tyrosine 4-hydroxyphenyl transferase [EC:2.5.1.147]
comA	K08097	4.4.1.19		phosphosulfolactate synthase [EC:4.4.1.19]
comB	K05979	3.1.3.71		2-phosphosulfolactate phosphatase [EC:3.1.3.71]
comC	K05884	1.1.1.337		L-2-hydroxycarboxylate dehydrogenase (NAD+) [EC:1.1.1.337]
comD	K06034	4.1.1.79		sulfopyruvate decarboxylase subunit alpha [EC:4.1.1.79]
comE	K13039	4.1.1.79		sulfopyruvate decarboxylase subunit beta [EC:4.1.1.79]
cooF	K00196			anaerobic carbon-monoxide dehydrogenase iron sulfur subunit
cooS	K00198	1.2.7.4		anaerobic carbon-monoxide dehydrogenase catalytic subunit [EC:1.2.7.4]
corA	K03284		1.A.35.1;1.A.35.3	magnesium transporter
coxA	K02274	1.9.3.1		cytochrome c oxidase subunit I [EC:1.9.3.1]
coxAC	K15408	1.9.3.1		cytochrome c oxidase subunit I+III [EC:1.9.3.1]
coxB	K02275	1.9.3.1		cytochrome c oxidase subunit II [EC:1.9.3.1]
coxC	K02276	1.9.3.1		cytochrome c oxidase subunit III [EC:1.9.3.1]
coxD	K02277	1.9.3.1		cytochrome c oxidase subunit IV [EC:1.9.3.1]
cpaA	K02278	3.4.23.43		cpaA, tadV; prepilin peptidase CpaA [EC:3.4.23.43]	Aspartic peptidases_Family A24: type IV prepilin peptidase family;A24
cpcA	K02284			phycocyanin alpha chain
cpcB	K02285			phycocyanin beta chain
cpcC	K02286			phycocyanin-associated rod linker protein
cpcD	K02287			phycocyanin-associated, rod
cpcE	K02288	4.4.1.32		phycocyanobilin lyase subunit alpha [EC:4.4.1.32]
cpcF	K02289	4.4.1.32		phycocyanobilin lyase subunit beta [EC:4.4.1.32]
cpcG	K02290			phycobilisome rod-core linker protein
cpeA	K05376			phycoerythrin alpha chain
cpeB	K05377			phycoerythrin beta chain
cpeC	K05378			phycoerythrin-associated linker protein
cpeD	K05379			phycoerythrin-associated linker protein
cpeE	K05380			phycoerythrin-associated linker protein
cpeR	K05381			phycoerythrin-associated linker protein
cpeS	K05382			phycoerythrin-associated linker protein
cpeT	K05383			CpeT protein
cpeU	K05384			bilin biosynthesis protein
cpeY	K05385			bilin biosynthesis protein
cpeZ	K05386			bilin biosynthesis protein
cpg	K01295	3.4.17.11		cpg; glutamate carboxypeptidase [EC:3.4.17.11]	Metallo peptidases_Family M20;M20
cps	K13048	3.4.17.-		cps; carboxypeptidase Ss1 [EC:3.4.17.-]	Metallo peptidases_Family M20;M20
cpt	K05996	3.4.17.18		cpt; carboxypeptidase T [EC:3.4.17.18]	Metallo peptidases_Family M14: carboxypeptidase A family;M14
cpxA	K07640	2.7.13.3		two-component system, OmpR family, sensor histidine kinase CpxA [EC:2.7.13.3]
cpxP	K06006			periplasmic protein CpxP/Spy
cpxR	K07662			two-component system, OmpR family, response regulator CpxR
croR	K17865	4.2.1.55		3-hydroxybutyryl-CoA dehydratase [EC:4.2.1.55]
crs	K05942	2.3.3.3		E2.3.3.3; citrate (Re)-synthase [EC:2.3.3.3]
crt	K01715	4.2.1.17		enoyl-CoA hydratase [EC:4.2.1.17]
crtA	K09847	1.14.15.9		spheroidene monooxygenase [EC:1.14.15.9]
crtB	K02291	2.5.1.32		15-cis-phytoene synthase [EC:2.5.1.32]
crtC	K09844	4.2.1.131		carotenoid 1,2-hydratase [EC:4.2.1.131]
crtD	K09845	1.3.99.27		1-hydroxycarotenoid 3,4-desaturase [EC:1.3.99.27]
crtF	K09846	2.1.1.210		demethylspheroidene O-methyltransferase [EC:2.1.1.210]
crtH	K09835	5.2.1.13		prolycopene isomerase [EC:5.2.1.13]
crtI	K10027	1.3.99.26;1.3.99.28;1.3.99.29;1.3.99.31		phytoene desaturase [EC:1.3.99.26 1.3.99.28 1.3.99.29 1.3.99.31]
crtL1	K06443	5.5.1.19		lycopene beta-cyclase [EC:5.5.1.19]
crtL2	K06444	5.5.1.18		lycopene epsilon-cyclase [EC:5.5.1.18]
crtM	K10208	2.5.1.96		4,4'-diapophytoene synthase [EC:2.5.1.96]
crtN	K10209	1.3.8.2		4,4'-diapophytoene desaturase [EC:1.3.8.2]
crtO	K02292			beta-carotene ketolase (CrtO type)
crtO-2_3_1	K10212	2.3.1.-		glycosyl-4,4'-diaponeurosporenoate acyltransferase [EC:2.3.1.-]
crtP	K02293	1.3.5.5		15-cis-phytoene desaturase [EC:1.3.5.5]
crtP-1_14_99_44	K10210	1.14.99.44		diapolycopene oxygenase [EC:1.14.99.44]
crtQ	K00514	1.3.5.6		zeta-carotene desaturase [EC:1.3.5.6]
crtQ-2_4_1	K10211	2.4.1.-		4,4'-diaponeurosporenoate glycosyltransferase [EC:2.4.1.-]
crtR	K02294	1.14.13.-		beta-carotene hydroxylase [EC:1.14.13.-]
crtU	K09879	1.3.99.39;1.3.99.40		carotenoid phi-ring synthase / carotenoid chi-ring synthase [EC:1.3.99.39 1.3.99.40]
crtW	K09836	1.14.99.63;1.14.99.64		beta-carotene/zeaxanthin 4-ketolase [EC:1.14.99.63 1.14.99.64]
crtX	K14596	2.4.1.276		zeaxanthin glucosyltransferase [EC:2.4.1.276]
crtY	K22502	5.5.1.19		lycopene beta-cyclase [EC:5.5.1.19]
crtZ	K15746	1.14.15.24		beta-carotene 3-hydroxylase [EC:1.14.15.24]
cruA	K14605	5.5.1.19		lycopene cyclase CruA [EC:5.5.1.19]
cruC	K14597			chlorobactene glucosyltransferase
cruD	K14598			chlorobactene lauroyltransferase
cruF	K08977	4.2.1.161		bisanhydrobacterioruberin hydratase [EC:4.2.1.161]
cruP	K14606	5.5.1.19		lycopene cyclase CruP [EC:5.5.1.19]
csmA	K08945			chlorosome envelope protein A
csmB	K08946			chlorosome envelope protein B
csmC	K08947			chlorosome envelope protein C
csmD	K08948			chlorosome envelope protein D
csmE	K08949			chlorosome envelope protein E
csmF	K08950			chlorosome envelope protein F
csmH	K08951			chlorosome envelope protein H
csmI	K08952			chlorosome envelope protein I
csmJ	K08953			chlorosome envelope protein J
csmX	K08954			chlorosome envelope protein X
cspA	K03704			cold shock protein	1
ctaA	K02259			cytochrome c oxidase assembly protein subunit 15
ctaG	K02258			cytochrome c oxidase assembly protein subunit 11
cusA	K07787		2.A.6.1.4	Cu(I)/Ag(I) efflux system membrane protein CusA/SilA
cusC	K07796		1.B.17.3.4;1.B.17.3.5	outer membrane protein, Cu(I)/Ag(I) efflux system
cwlK	K17733	3.4.-.-		cwlK; peptidoglycan LD-endopeptidase CwlK [EC:3.4.-.-]	Metallo peptidases_Family M15: zinc D-Ala-D-Ala carboxypeptidase family;M15
cwlO	K21471	3.4.-.-		cwlO; peptidoglycan DL-endopeptidase CwlO [EC:3.4.-.-]	Cysteine peptidases_Family C40;C40
cwlS	K19220	3.4.-.-		cwlS; peptidoglycan DL-endopeptidase CwlS [EC:3.4.-.-]	Cysteine peptidases_Family C40;C40
cycA	K11737		2.A.3.1.17_M1IW84;2.A.3.1.7_P0AAE0	D-serine/D-alanine/glycine transporter
cydA	K00425	7.1.1.7		cytochrome bd ubiquinol oxidase subunit I [EC:7.1.1.7]
cydB	K00426	7.1.1.7		cytochrome bd ubiquinol oxidase subunit II [EC:7.1.1.7]
cydC	K16012		3.A.1.129.1_P23886	ATP-binding cassette, subfamily C, bacterial CydC
cydCD	K16014		3.A.1.129	ATP-binding cassette, subfamily C, bacterial CydCD
cydD	K16013		3.A.1.129.1_P29018	ATP-binding cassette, subfamily C, bacterial CydD
cydX	K00424	7.1.1.7		cytochrome bd-I ubiquinol oxidase subunit X [EC:7.1.1.7]
cyoA	K02297	7.1.1.3		cytochrome o ubiquinol oxidase subunit II [EC:7.1.1.3]
cyoB	K02298	7.1.1.3		cytochrome o ubiquinol oxidase subunit I [EC:7.1.1.3]
cyoC	K02299			cytochrome o ubiquinol oxidase subunit III
cyoD	K02300			cytochrome o ubiquinol oxidase subunit IV
cyoE	K02257	2.5.1.141		heme o synthase [EC:2.5.1.141]
cysA	K02045	7.3.2.3	3.A.1.6.1;3.A.1.6.3;3.A.1.6.7	sulfate/thiosulfate transport system ATP-binding protein [EC:7.3.2.3]
cysC	K00860	2.7.1.25		adenylylsulfate kinase [EC:2.7.1.25]
cysD	K00957	2.7.7.4		sulfate adenylyltransferase subunit 2 [EC:2.7.7.4]
cysE1	K00640	2.3.1.30		serine O-acetyltransferase [EC:2.3.1.30]
cysE2	K23304	2.3.1.30		serine O-acetyltransferase [EC:2.3.1.30]
cysH	K00390	1.8.4.8;1.8.4.10		phosphoadenosine phosphosulfate reductase [EC:1.8.4.8 1.8.4.10]
cysI	K00381	1.8.1.2		sulfite reductase (NADPH) hemoprotein beta-component [EC:1.8.1.2]
cysJ	K00380	1.8.1.2		sulfite reductase (NADPH) flavoprotein alpha-component [EC:1.8.1.2]
cysK	K01738	2.5.1.47		cysteine synthase [EC:2.5.1.47]
cysN	K00956	2.7.7.4		sulfate adenylyltransferase subunit 1 [EC:2.7.7.4]
cysNC	K00955	2.7.7.4;2.7.1.25		bifunctional enzyme CysN/CysC [EC:2.7.7.4 2.7.1.25]
cysO	K10150	2.5.1.47;2.5.1.65;4.2.1.22		cysteine synthase / O-phosphoserine sulfhydrylase / cystathionine beta-synthase [EC:2.5.1.47 2.5.1.65 4.2.1.22]
cysP	K02048		3.A.1.6.1;3.A.1.6.3	sulfate transport system substrate-binding protein
cysU	K02046		3.A.1.6.1;3.A.1.6.3;3.A.1.6.7	sulfate transport system permease protein
cysW	K02047		3.A.1.6.1;3.A.1.6.3;3.A.1.6.7	sulfate transport system permease protein
czcA	K15726		2.A.6.1.2	cobalt-zinc-cadmium resistance protein CzcA
czcC	K15725		1.B.17.2.2	outer membrane protein, cobalt-zinc-cadmium efflux system
czcD	K16264		2.A.4.1	cobalt-zinc-cadmium efflux system protein
dacB	K07259	3.4.16.4;3.4.21.-		dacB; serine-type D-Ala-D-Ala carboxypeptidase/endopeptidase (penicillin-binding protein 4) [EC:3.4.16.4 3.4.21.-]	Serine peptidases_Family S13: D-Ala-D-Ala peptidase C family;S13
dacC	K07258	3.4.16.4		dacC, dacA, dacD; serine-type D-Ala-D-Ala carboxypeptidase (penicillin-binding protein 5/6) [EC:3.4.16.4]	Serine peptidases_Family S11: D-Ala-D-Ala carboxypeptidase A family;S11
dak	K00863	2.7.1.28;2.7.1.29;4.6.1.15		triose/dihydroxyacetone kinase / FAD-AMP lyase (cyclizing) [EC:2.7.1.28 2.7.1.29 4.6.1.15]
DAS	K17100	2.2.1.3		dihydroxyacetone synthase [EC:2.2.1.3]
dasA	K17329		3.A.1.1.33_Q8KN19	N,N'-diacetylchitobiose transport system substrate-binding protein
dasB	K17330		3.A.1.1.33_Q8KN18	N,N'-diacetylchitobiose transport system permease protein
dasC	K17331		3.A.1.1.33_Q8KN17	N,N'-diacetylchitobiose transport system permease protein
dcp	K01284	3.4.15.5		dcp; peptidyl-dipeptidase Dcp [EC:3.4.15.5]	Metallo peptidases_Family M3;M3
dctA	K11103		2.A.23.1.10_Q848I3;2.A.23.1.3_Q01857;2.A.23.1.6_P96603;2.A.23.1.9_Q1J1H5	aerobic C4-dicarboxylate transport protein
dctM	K11690		2.A.56.1.1_O07838	C4-dicarboxylate transporter, DctM subunit
dctP	K11688		2.A.56.1.1_P37735	C4-dicarboxylate-binding protein DctP
dctQ	K11689		2.A.56.1.1_O07837	C4-dicarboxylate transporter, DctQ subunit
dcuA	K07791		2.A.13.1.1_P0ABN5;2.A.13.1.3_Q8ZLD2;2.A.13.1.4_K0K2U6	anaerobic C4-dicarboxylate transporter DcuA
dcuB	K07792		2.A.13.1.2_P0ABN9;2.A.13.1.3_Q8ZLD2;2.A.13.1.4_K0K2U6	anaerobic C4-dicarboxylate transporter DcuB
dcuC	K03326		2.A.61.1.1_P0ABP3;2.A.61.1.2_P45428	C4-dicarboxylate transporter, DcuC family
dddL	K16953	4.4.1.3		dimethylpropiothetin dethiomethylase [EC:4.4.1.3]
ddhA	K16964	1.8.2.4		dimethylsulfide dehydrogenase subunit alpha [EC:1.8.2.4]
ddhB	K16965			dimethylsulfide dehydrogenase subunit beta
ddhC	K16966			dimethylsulfide dehydrogenase subunit gamma
deaD	K05592	3.6.4.13		ATP-dependent RNA helicase DeaD [EC:3.6.4.13]
degP	K04771	3.4.21.107		degP, htrA; serine protease Do [EC:3.4.21.107]	Serine peptidases_Family S1: chymotrypsin family;S1
degQ	K04772	3.4.21.-		degQ, hhoA; serine protease DegQ [EC:3.4.21.-]	Serine peptidases_Family S1: chymotrypsin family;S1
degS	K07777	2.7.13.3		two-component system, NarL family, sensor histidine kinase DegS [EC:2.7.13.3]
degU	K07692			two-component system, NarL family, response regulator DegU
desA	K10255	1.14.19.23;1.14.19.45		acyl-lipid omega-6 desaturase (Delta-12 desaturase) [EC:1.14.19.23 1.14.19.45]	1
desK	K07778	2.7.13.3		two-component system, NarL family, sensor histidine kinase DesK [EC:2.7.13.3]	1
desR	K07693			two-component system, NarL family, response regulator DesR	1
devA	K02003		3.A.1.114.1_O50296	putative ABC transport system ATP-binding protein
devB	K02005		3.A.1.114.1_Q7A2B0	HlyD family secretion protein
devC	K02004		3.A.1.114.1_O50295	putative ABC transport system permease protein
devR	K07695			two-component system, NarL family, response regulator DevR
devS	K07682	2.7.13.3		two-component system, NarL family, sensor histidine kinase DevS [EC:2.7.13.3]
dgaEIIA	K17464	2.7.1.69	4.A.6.1.17_D0ZLR7	PTS system, D-glucosaminate-specific IIA component [EC:2.7.1.69]
dgaEIIB	K17465	2.7.1.69	4.A.6.1.17_D0ZLR6	PTS system, D-glucosaminate-specific IIB component [EC:2.7.1.69]
dgaEIIC	K17466		4.A.6.1.17_D0ZLR5	PTS system, D-glucosaminate-specific IIC component
dgaEIID	K17467		4.A.6.1.17_D0ZLR4	PTS system, D-glucosaminate-specific IID component
dgaF	K17463	4.1.2.14		dgaF; 2-dehydro-3-deoxy-phosphogluconate aldolase [EC:4.1.2.14]
dglEIIA	K02763	2.7.1.69	4.A.1.1.6	PTS system, D-glucosamine-specific IIA component [EC:2.7.1.69]
dglEIIB	K02764	2.7.1.69	4.A.1.1.6	PTS system, D-glucosamine-specific IIB component [EC:2.7.1.69]
dglEIIC	K02765		4.A.1.1.13_Q57071;4.A.1.1.14_Q53922;4.A.1.1.6_P39816;4.A.1.1.9_P20166	PTS system, D-glucosamine-specific IIC component
dhaB	K06120	4.2.1.30		glycerol dehydratase large subunit [EC:4.2.1.30]
dhaC	K06121	4.2.1.30		glycerol dehydratase medium subunit [EC:4.2.1.30]
dhaM	K05881			PTS hybrid protein
dhaT	K00086	1.1.1.202		1,3-propanediol dehydrogenase [EC:1.1.1.202]
dhbE	K06122	4.2.1.30		glycerol dehydratase small subunit [EC:4.2.1.30]
dlst	K00658	2.3.1.61		2-oxoglutarate dehydrogenase E2 component (dihydrolipoamide succinyltransferase) [EC:2.3.1.61]
dltB	K03739		2.A.50.2.1_P39580	membrane protein involved in D-alanine export
dmd-tmd	K00317	1.5.8.1;1.5.8.2		dimethylamine/trimethylamine dehydrogenase [EC:1.5.8.1 1.5.8.2]
dmdA	K17486	2.1.1.269		dimethylsulfoniopropionate demethylase [EC:2.1.1.269]
dmdB	K20034	6.2.1.44		3-(methylthio)propionyl---CoA ligase [EC:6.2.1.44]
dmdC	K20035	1.3.8.-		3-(methylthio)propanoyl-CoA dehydrogenase [EC:1.3.8.-]
dmdD	K20036	4.2.1.155		(methylthio)acryloyl-CoA hydratase [EC:4.2.1.155]
dmoA	K16967	1.14.13.131		dimethyl-sulfide monooxygenase [EC:1.14.13.131]
dmpA	K01266	3.4.11.19		dmpA, dap; D-aminopeptidase [EC:3.4.11.19]	Mixed peptidases_Family P1: DmpA aminopeptidase family;P1
dmsA	K07306	1.8.5.3		anaerobic dimethyl sulfoxide reductase subunit A [EC:1.8.5.3]
dmsB	K07307			anaerobic dimethyl sulfoxide reductase subunit B
dmsC	K07308			anaerobic dimethyl sulfoxide reductase subunit C
dnaJ	K03686			molecular chaperone DnaJ, HSP40
dnaK	K04043			molecular chaperone DnaK, HSP70
doxA	K16936	1.8.5.2		thiosulfate dehydrogenase [quinone] small subunit [EC:1.8.5.2]
doxD	K16937	1.8.5.2		thiosulfate dehydrogenase [quinone] large subunit [EC:1.8.5.2]
doxDA	K05908	1.8.5.2		thiosulfate dehydrogenase (quinone) [EC:1.8.5.2]
doxX	K15977			putative oxidoreductase
dppA	K16203	3.4.11.-	3.A.1.5.2_P26902	D-amino peptidase [EC:3.4.11.-]	Metallo peptidases_Family M55: DppA aminopeptidase family;M55
dppA1	K12368		3.A.1.5.39_W0WJ85;3.A.1.5.39_W0WKZ8;3.A.1.5.39_W0WL02;3.A.1.5.39_W0WLZ1;3.A.1.5.39_W0WQF0	dipeptide transport system substrate-binding protein
dppB1	K12369		3.A.1.5.39_W0WN20	dipeptide transport system permease protein
dppB2	K16200		3.A.1.5.2_P26903	dipeptide transport system permease protein
dppC1	K12370		3.A.1.5.39_W0WMS8	dipeptide transport system permease protein
dppC2	K16201		3.A.1.5.2_P26904	dipeptide transport system permease protein
dppD1	K12371		3.A.1.5.39_W0WJ90	dipeptide transport system ATP-binding protein
dppD2	K16202		3.A.1.5.2_P26905	dipeptide transport system ATP-binding protein
dppE	K16199		3.A.1.5.2_P26906	dipeptide transport system substrate-binding protein
dppF1	K12372		3.A.1.5.39_W0WLZ8	dipeptide transport system ATP-binding protein
dps	K04047			starvation-inducible DNA-binding protein
dsdX	K13629		2.A.8.1.5_P08555	D-serine transporter
dsrA	K11180	1.8.99.5		dissimilatory sulfite reductase alpha subunit [EC:1.8.99.5]
dsrB	K11181	1.8.99.5		dissimilatory sulfite reductase beta subunit [EC:1.8.99.5]
dsrC	K23077			dissimilatory sulfite reductase related protein
dsrD				dissimilatory sulfite reductase D
dsrE	K07235	2.8.1.-		tRNA 2-thiouridine synthesizing protein D [EC:2.8.1.-]
dsrF	K07236			tRNA 2-thiouridine synthesizing protein C
dsrH	K07237			tusB, dsrH; tRNA 2-thiouridine synthesizing protein B
dsrJ				sulfite reductase-associated electron transfer protein DsrJ
dsrK				sulfite reductase-associated electron transfer protein DsrK
dsrL				intracellular sulfur oxidation protein DsrL
dsrN_cobB-cbiA	K02224	6.3.5.9;6.3.5.11		cobyrinic acid a,c-diamide synthase [EC:6.3.5.9 6.3.5.11]
dsrO				sulfite reduction-associated complex DsrMKJOP iron-sulfur protein DsrO
dsrP				sulfite reductase-associated electron transfer protein DsrP
dsrR				intracellular sulfur oxidation protein DsrR
dsrS				sulfur reduction protein DsrS
E3.4.11.10	K05994	3.4.11.10		E3.4.11.10; bacterial leucyl aminopeptidase [EC:3.4.11.10]	Metallo peptidases_Family M28: aminopeptidase Y family;M28
E3.4.11.24	K19702	3.4.11.24		E3.4.11.24; aminopeptidase S [EC:3.4.11.24]	Metallo peptidases_Family M28: aminopeptidase Y family;M28
E3.4.17.14	K08640	3.4.17.14		E3.4.17.14; zinc D-Ala-D-Ala carboxypeptidase [EC:3.4.17.14]	Metallo peptidases_Family M15: zinc D-Ala-D-Ala carboxypeptidase family;M15
E3.4.17.19	K01299	3.4.17.19		E3.4.17.19; carboxypeptidase Taq [EC:3.4.17.19]	Metallo peptidases_Family M32: carboxypeptidase Taq family;M32
E3.4.21.121	K20755	3.4.21.121		E3.4.21.121; Lys-Lys/Arg-Xaa endopeptidase [EC:3.4.21.121]	Serine peptidases_Family S8: subtilisin family;S8
E3.4.21.50	K01337	3.4.21.50		E3.4.21.50; lysyl endopeptidase [EC:3.4.21.50]	Serine peptidases_Family S1: chymotrypsin family;S1
E3.4.24.32	K20749	3.4.24.32		E3.4.24.32; beta-lytic metalloendopeptidase [EC:3.4.24.32]	Metallo peptidases_Family M23;M23
E3.4.24.33	K23743	3.4.24.33		E3.4.24.33; peptidyl-Asp metalloendopeptidase [EC:3.4.24.33]	Metallo peptidases_Family M72;M72
eamA	K15268		2.A.7.3.2_P31125	O-acetylserine/cysteine efflux transporter
eamB	K11249		2.A.76.1.4_P38101	cysteine/O-acetylserine efflux protein
ebr	K18975		2.A.7.1.11	small multidrug resistance pump
ebrA	K11814		2.A.7.1.6	multidrug resistance protein EbrA
ebrB	K11815		2.A.7.1.6	multidrug resistance protein EbrB
ecfA1	K16786	3.6.3.-	3.A.1.25.5_Q9X1Z1;3.A.1.25.6_Q5M243;3.A.1.26.10_Q839D5	energy-coupling factor transport system ATP-binding protein [EC:3.6.3.-]
ecfA2	K16787	7.-.-.-		energy-coupling factor transport system ATP-binding protein [EC:7.-.-.-]
ecfT	K16785		3.A.1.29.1_Q74I61;3.A.1.25.5_Q9X2I1;3.A.1.25.6_Q5M245;3.A.1.26.10_I7BV49;3.A.1.32.1_Q9KXJ7;3.A.1.32.2_Q2NFA7;3.A.1.32.3_A9WJX6;3.A.1.33.1_Q8R9L9	energy-coupling factor transport system permease protein
echA	K14086			ech hydrogenase subunit A
echB	K14087			ech hydrogenase subunit B
echC	K14088			ech hydrogenase subunit C
echD	K14089			ech hydrogenase subunit D
echE	K14090			ech hydrogenase subunit E
echF	K14091			ech hydrogenase subunit F
eda	K01625	4.1.2.1		eda; 2-dehydro-3-deoxyphosphogluconate aldolase / (4S)-4-hydroxy-2-oxoglutarate aldolase [EC:4.1.2.1
edd	K01690	4.2.1.12		edd; phosphogluconate dehydratase [EC:4.2.1.12]
eexD	K16299		3.A.1.110.13_O67184;3.A.1.110.10	ATP-binding cassette, subfamily C, bacterial EexD
efeB	K16301	1.11.1.-	2.A.108.2.3	deferrochelatase/peroxidase EfeB [EC:1.11.1.-]
efeO	K07224		2.A.108.2.3	iron uptake system component EfeO
emrK	K03543		2.A.1.3.36_C5W790	membrane fusion protein, multidrug efflux system
emrY	K03446		2.A.1.3.20_Q9RQ29;2.A.1.3.36_C5W789	MFS transporter, DHA2 family, multidrug resistance protein
eno	K01689	4.2.1.11		ENO, eno; enolase [EC:4.2.1.11]
entS	K08225		2.A.1.38.1_P24077	MFS transporter, ENTS family, enterobactin (siderophore) exporter
envZ	K07638	2.7.13.3		two-component system, OmpR family, osmolarity sensor histidine kinase EnvZ [EC:2.7.13.3]
epi	K05606	5.1.99.1		methylmalonyl-CoA/ethylmalonyl-CoA epimerase [EC:5.1.99.1]
epr	K13277	3.4.21.-		epr; minor extracellular protease Epr [EC:3.4.21.-]	Serine peptidases_Family S8: subtilisin family;S8
epsE	K16712		2.A.66.2.11_Q45411	EPS I polysaccharide export inner membrane protein EpsE
epsF	K16713			EPS I polysaccharide export inner membrane protein EpsF
erfK	K16291			erfK; L,D-transpeptidase ErfK/SrfK	Cysteine peptidases_Family C82;C82
eryE	K17204		3.A.1.2.11_Q92WK2;3.A.1.2.16_Q1M4Q7	erythritol transport system ATP-binding protein
eryF	K17203		3.A.1.2.11_Q92WK1;3.A.1.2.16_Q1M4Q8	erythritol transport system permease protein
eryG	K17202		3.A.1.2.11_Q92WK4;3.A.1.2.16_Q1M4Q9	erythritol transport system substrate-binding protein
eutK	K04025			ethanolamine utilization protein EutK
eutL	K04026			ethanolamine utilization protein EutL
eutM	K04027			ethanolamine utilization protein EutM
eutN	K04028			ethanolamine utilization protein EutN
eutS	K04031			ethanolamine utilization protein EutS
evgA	K07690			two-component system, NarL family, response regulator EvgA
evgS	K07679	2.7.13.3		two-component system, NarL family, sensor histidine kinase EvgS [EC:2.7.13.3]
exaA	K00114	1.1.2.8		exaA; alcohol dehydrogenase (cytochrome c) [EC:1.1.2.8]
exbB	K03561		1.A.30.2.1	biopolymer transport protein ExbB
exbD	K03559		1.A.30.2.1	biopolymer transport protein ExbD
exoF	K16552		1.B.18.1.1_Q02728	exopolysaccharide production protein ExoF
exoY	K16566			exopolysaccharide production protein ExoY
exoT	K16553		2.A.66.2.2	succinoglycan exporter
fadB	K01825	1.1.1.35;4.2.1.17;5.1.2.3;5.3.3.8		3-hydroxyacyl-CoA dehydrogenase / enoyl-CoA hydratase / 3-hydroxybutyryl-CoA epimerase / enoyl-CoA isomerase [EC:1.1.1.35 4.2.1.17 5.1.2.3 5.3.3.8]
fadJ	K01782	1.1.1.35;4.2.1.17;5.1.2.3		3-hydroxyacyl-CoA dehydrogenase / enoyl-CoA hydratase / 3-hydroxybutyryl-CoA epimerase [EC:1.1.1.35 4.2.1.17 5.1.2.3]
fadL	K06076	1.B.9		long-chain fatty acid transport protein
fadN	K07516	1.1.1.35		3-hydroxyacyl-CoA dehydrogenase [EC:1.1.1.35]
fae	K10713	4.2.1.147		5,6,7,8-tetrahydromethanopterin hydro-lyase [EC:4.2.1.147]
fae-hps	K13812	4.2.1.147;4.1.2.43		bifunctional enzyme Fae/Hps [EC:4.2.1.147 4.1.2.43]
fba_2	K16305	4.1.2.13;2.2.1.11		fructose-bisphosphate aldolase / 6-deoxy-5-ketofructose 1-phosphate synthase [EC:4.1.2.13 2.2.1.11]
fba_3	K16306	4.1.2.13;2.2.1.10		fructose-bisphosphate aldolase / 2-amino-3,7-dideoxy-D-threo-hept-6-ulosonate synthase [EC:4.1.2.13 2.2.1.10]
fbcH	K00410			ubiquinol-cytochrome c reductase cytochrome b/c1 subunit
fbiC	K11779	2.5.1.147;4.3.1.32		FO synthase [EC:2.5.1.147 4.3.1.32]
fbpap	K01622	4.1.2.13;3.1.3.11		K01622; fructose 1,6-bisphosphate aldolase/phosphatase [EC:4.1.2.13 3.1.3.11]
fbpI	K03841	3.1.3.11		fructose-1,6-bisphosphatase I [EC:3.1.3.11]
fbpI-sebp	K01086	3.1.3.11;3.1.3.37		fructose-1,6-bisphosphatase I / sedoheptulose-1,7-bisphosphatase [EC:3.1.3.11 3.1.3.37]
fbpII	K01104	3.1.3.11		fructose-1,6-bisphosphatase II [EC:3.1.3.11]
fbpII-sebp	K11532	3.1.3.11;3.1.3.37		glpX-SEBP; fructose-1,6-bisphosphatase II / sedoheptulose-1,7-bisphosphatase [EC:3.1.3.11 3.1.3.37]
fbpIII	K04041	3.1.3.11		fructose-1,6-bisphosphatase III [EC:3.1.3.11]
fccA	K17230			cytochrome subunit of sulfide dehydrogenase
fccB	K17229	1.8.2.3		sulfide dehydrogenase [flavocytochrome c] flavoprotein chain [EC:1.8.2.3]
fchA	K01500	3.5.4.9		methenyltetrahydrofolate cyclohydrolase [EC:3.5.4.9]
fdh	K00122	1.17.1.9		formate dehydrogenase [EC:1.17.1.9]
fdh.NADP+A	K05299	1.17.1.10		formate dehydrogenase (NADP+) alpha subunit [EC:1.17.1.10]
fdh.NADP+B	K15022	1.17.1.10		formate dehydrogenase (NADP+) beta subunit [EC:1.17.1.10]
fdhA	K00148	1.2.1.46		glutathione-independent formaldehyde dehydrogenase [EC:1.2.1.46]
fdhAF420	K22516	1.17.98.3;1.8.98.6		formate dehydrogenase (coenzyme F420) alpha subunit [EC:1.17.98.3 1.8.98.6]
fdhBF420	K00125	1.17.98.3;1.8.98.6		formate dehydrogenase (coenzyme F420) beta subunit [EC:1.17.98.3 1.8.98.6]
fdhC	K21993		1.A.16.2	formate transporter
fdhF	K00123	1.17.1.9		formate dehydrogenase major subunit [EC:1.17.1.9]
fdhH	K00124			formate dehydrogenase iron-sulfur subunit
fdoI	K00127			formate dehydrogenase subunit gamma
fdsD	K00126	1.17.1.9		formate dehydrogenase subunit delta [EC:1.17.1.9]
fdwB	K22515	1.17.1.9		formate dehydrogenase beta subunit [EC:1.17.1.9]
fecA	K16091		1.B.14.1.12_Q9HXB2;1.B.14.1.20_P13036	Fe(3+) dicitrate transport protein
fecB	K23181		3.A.1.14.1;3.A.1.14.8	ferric citrate transport system substrate-binding protein
fecC	K23183		3.A.1.14.1;3.A.1.14.8	ferric citrate transport system permease protein
fecD	K23182		3.A.1.14.1;3.A.1.14.8	ferric citrate transport system permease protein
fecE	K23184	7.2.2.18	3.A.1.14.1;3.A.1.14.8	ferric citrate transport system ATP-binding protein [EC:7.2.2.18]
feoA	K04758			ferrous iron transport protein A
feoB	K04759			ferrous iron transport protein B
fepA	K19611		1.B.14.1.22_P05825;1.B.14.1.3_O54507;1.B.14.1.5_Q05098	ferric enterobactin receptor
fepB	K23185		3.A.1.14.2;3.A.1.14.6	ferric enterobactin transport system substrate-binding protein
fepC	K23188		3.A.1.14.2;3.A.1.14.6	ferric enterobactin transport system ATP-binding protein
fepD	K23186		3.A.1.14.2;3.A.1.14.6	ferric enterobactin transport system permease protein
fepG	K23187		3.A.1.14.2;3.A.1.14.6	ferric enterobactin transport system permease protein
fevA	K02013	3.6.3.34	3.A.1.13.2_A9WCZ7;3.A.1.14.13_Q9RK11;3.A.1.14.14_Q9A197;3.A.1.14.1_P15031;3.A.1.14.2_P23878;3.A.1.14.3_P07821;3.A.1.14.4_Q47087;3.A.1.14.6_Q9RCF3;3.A.1.14.7_Q9X665;3.A.1.14.8_Q8GRB0	iron complex transport system ATP-binding protein [EC:3.6.3.34]
fevP	K02015		3.A.1.13.2_A9WCZ6;3.A.1.14.13_Q9RK09;3.A.1.14.13_Q9RK10;3.A.1.14.14_Q06A41;3.A.1.14.14_Q9A199;3.A.1.14.15_P40410;3.A.1.14.15_P40411;3.A.1.14.1_P15029;3.A.1.14.1_P15030;3.A.1.14.2_P23876;3.A.1.14.2_P23877;3.A.1.14.3_P06972;3.A.1.14.4_Q47085;3.A.1.14.4_Q47086;3.A.1.14.6_Q9RCF4;3.A.1.14.6_Q9RCF5;3.A.1.14.7_Q9X664;3.A.1.14.8_Q8GRB1;3.A.1.14.8_Q8GRB2	iron complex transport system permease protein
fevS	K02016		3.A.1.13.2_A9WCZ4;3.A.1.14.13_Q9RK12;3.A.1.14.14_Q9A198;3.A.1.14.15_P40409;3.A.1.14.1_P15028;3.A.1.14.2_C8U2V6;3.A.1.14.3_P07822;3.A.1.14.4_Q47084;3.A.1.14.6_Q9RCF6;3.A.1.14.7_Q93PN3;3.A.1.14.7_Q99RY8;3.A.1.14.8_Q8GRB3	iron complex transport system substrate-binding protein
fhuB	K23228		3.A.1.14.3;3.A.1.14.12	ferric hydroxamate transport system permease protein
fhuC	K10829	3.6.3.34	3.A.1.14.3;3.A.1.14.12	iron-chelate-transporting ATPase [EC:3.6.3.34]
fhuD	K23227		3.A.1.14.3;3.A.1.14.12	ferric hydroxamate transport system substrate-binding protein
fieF	K13283		2.A.4.7.1	ferrous-iron efflux pump FieF
fiu	K16090		1.B.14.1.9_P75780	catecholate siderophore receptor
fixJ	K14987			two-component system, LuxR family, response regulator FixJ
fixL	K14986	2.7.13.3		two-component system, LuxR family, sensor kinase FixL [EC:2.7.13.3]
flaK	K07991	3.4.23.52		flaK; archaeal preflagellin peptidase FlaK [EC:3.4.23.52]	Aspartic peptidases_Family A24: type IV prepilin peptidase family;A24
flgA	K02386			flagella basal body P-ring formation protein FlgA
flgB	K02387			flagellar basal-body rod protein FlgB
flgC	K02388			flagellar basal-body rod protein FlgC
flgD	K02389			flagellar basal-body rod modification protein FlgD
flgE	K02390			flagellar hook protein FlgE
flgF	K02391			flagellar basal-body rod protein FlgF
flgG	K02392			flagellar basal-body rod protein FlgG
flgH	K02393			flagellar L-ring protein precursor FlgH
flgI	K02394			flagellar P-ring protein precursor FlgI
flgK	K02396			flagellar hook-associated protein 1 FlgK
flgL	K02397			flagellar hook-associated protein 3 FlgL
flgM	K02398			negative regulator of flagellin synthesis FlgM
flgN	K02399			flagella synthesis protein FlgN
flhA	K02400			flagellar biosynthesis protein FlhA
flhB	K02401			flagellar biosynthetic protein FlhB
flhC	K02402			flagellar transcriptional activator FlhC
flhD	K02403			flagellar transcriptional activator FlhD
fliA	K02405			RNA polymerase sigma factor for flagellar operon FliA
fliC	K02406			flagellin
fliD	K02407			flagellar hook-associated protein 2
fliE	K02408			flagellar hook-basal body complex protein FliE
fliF	K02409			flagellar M-ring protein FliF
fliG	K02410			flagellar motor switch protein FliG
fliH	K02411			flagellar assembly protein FliH
fliI	K02412	7.4.2.8		flagellum-specific ATP synthase [EC:7.4.2.8]
fliJ	K02413			flagellar FliJ protein
fliK	K02414			flagellar hook-length control protein FliK
fliM	K02416			flagellar motor switch protein FliM
fliN	K02417			flagellar motor switch protein FliN
fliO	K02418			flagellar protein FliO/FliZ
fliP	K02419			flagellar biosynthetic protein FliP
fliQ	K02420			flagellar biosynthetic protein FliQ
fliR	K02421			flagellar biosynthetic protein FliR
fliRflhB	K13820			flagellar biosynthetic protein FliR/FlhB
fliS	K02422			flagellar protein FliS
fliT	K02423			flagellar protein FliT
flqA	K16905		3.A.1	fluoroquinolone transport system permease protein
flqB	K16906		3.A.1	fluoroquinolone transport system permease protein
flqC	K16907	3.6.3.-	3.A.1	fluoroquinolone transport system ATP-binding protein [EC:3.6.3.-]
fmoA	K08944			bacteriochlorophyll A protein
fnr	K01420			CRP/FNR family transcriptional regulator, anaerobic regulatory protein
focA	K06212		1.A.16.1.1_P0AC23;1.A.16.1.2_P77733;1.A.16.1.3_F9A868	formate transporter
focB	K03459		1.A.16.1.2_P77733	formate transporter
folD	K01491	1.5.1.5;3.5.4.9		methylenetetrahydrofolate dehydrogenase (NADP+) / methenyltetrahydrofolate cyclohydrolase [EC:1.5.1.5 3.5.4.9]
fpoA	K22158	1.5.98.3		F420H2 dehydrogenase subunit A [EC:1.5.98.3]
fpoB	K22159	1.5.98.3		F420H2 dehydrogenase subunit B [EC:1.5.98.3]
fpoC	K22160	1.5.98.3		F420H2 dehydrogenase subunit C [EC:1.5.98.3]
fpoD	K22161	1.5.98.3		F420H2 dehydrogenase subunit D [EC:1.5.98.3]
fpoF	K22162	1.5.7.2;1.5.98.3		F420H2 dehydrogenase subunit F [EC:1.5.7.2 1.5.98.3]
fpoH	K22163	1.5.98.3		F420H2 dehydrogenase subunit H [EC:1.5.98.3]
fpoI	K22164	1.5.98.3		F420H2 dehydrogenase subunit I [EC:1.5.98.3]
fpoJ	K22165	1.5.98.3		F420H2 dehydrogenase subunit J [EC:1.5.98.3]
fpoK	K22166	1.5.98.3		F420H2 dehydrogenase subunit K [EC:1.5.98.3]
fpoL	K22167	1.5.98.3		F420H2 dehydrogenase subunit L [EC:1.5.98.3]
fpoM	K22168	1.5.98.3		F420H2 dehydrogenase subunit M [EC:1.5.98.3]
fpoN	K22169	1.5.98.3		F420H2 dehydrogenase subunit N [EC:1.5.98.3]
fpoO	K22170	1.5.98.3		F420H2 dehydrogenase subunit O [EC:1.5.98.3]
fpvA	K16088		1.B.14.1.14_P25184;1.B.14.1.1_P16869	outer-membrane receptor for ferric coprogen and ferric-rhodotorulic acid
fqoA	K22171	1.1.98.4		F420H2:quinone oxidoreductase subunit A [EC:1.1.98.4]
fqoBC	K22172	1.1.98.4		F420H2:quinone oxidoreductase subunit B/C [EC:1.1.98.4]
fqoD	K22173	1.1.98.4		F420H2:quinone oxidoreductase subunit D [EC:1.1.98.4]
fqoF	K22174	1.1.98.4		F420H2:quinone oxidoreductase subunit F [EC:1.1.98.4]
fqoH	K22175	1.1.98.4		F420H2:quinone oxidoreductase subunit H [EC:1.1.98.4]
fqoI	K22176	1.1.98.4		F420H2:quinone oxidoreductase subunit I [EC:1.1.98.4]
fqoJ	K22177	1.1.98.4		F420H2:quinone oxidoreductase subunit J [EC:1.1.98.4]
fqoK	K22178	1.1.98.4		F420H2:quinone oxidoreductase subunit K [EC:1.1.98.4]
fqoL	K22179	1.1.98.4		F420H2:quinone oxidoreductase subunit L [EC:1.1.98.4]
fqoM	K22180	1.1.98.4		F420H2:quinone oxidoreductase subunit M [EC:1.1.98.4]
fqoN	K22181	1.1.98.4		F420H2:quinone oxidoreductase subunit N [EC:1.1.98.4]
frcA	K10554		3.A.1.2.7_Q9F9B0	fructose transport system ATP-binding protein
frcB	K10552		3.A.1.2.7_Q9F9B2	fructose transport system substrate-binding protein
frcC	K10553		3.A.1.2.7_Q9F9B1	fructose transport system permease protein
frd.NADHA	K18556	1.3.1.6		NADH-dependent fumarate reductase subunit A [EC:1.3.1.6]
frd.NADHB	K18557	1.3.1.6		NADH-dependent fumarate reductase subunit B [EC:1.3.1.6]
frd.NADHC	K18558			NADH-dependent fumarate reductase subunit C
frd.NADHD	K18559			NADH-dependent fumarate reductase subunit D
frd.NADHE	K18560			NADH-dependent fumarate reductase subunit E
frdA	K00244	1.3.5.4		fumarate reductase flavoprotein subunit [EC:1.3.5.4]
frdB	K00245	1.3.5.4		fumarate reductase iron-sulfur subunit [EC:1.3.5.4]
frdC	K00246			fumarate reductase subunit C
frdD	K00247			fumarate reductase subunit D
frhA	K00440	1.12.98.1		coenzyme F420 hydrogenase subunit alpha [EC:1.12.98.1]
frhB	K00441	1.12.98.1		coenzyme F420 hydrogenase subunit beta [EC:1.12.98.1]
frhD	K00442			coenzyme F420 hydrogenase subunit delta
frhG	K00443	1.12.98.1		coenzyme F420 hydrogenase subunit gamma [EC:1.12.98.1]
frmA	K00121	1.1.1.284;1.1.1.1		S-(hydroxymethyl)glutathione dehydrogenase / alcohol dehydrogenase [EC:1.1.1.284 1.1.1.1]
frmB	K01070	3.1.2.12		S-formylglutathione hydrolase [EC:3.1.2.12]
fru1EIIA	K02768	2.7.1.69	4.A.2.1.14_D2RXA7;4.A.2.1.15_D4GYE4;4.A.2.1.20_Q3K0G6;4.A.2.1.21_F8Y3B4;4.A.2.1.22_Q3JZE3;4.A.2.1.23_T5HNP5;4.A.2.1.25_P32155;4.A.2.1.26_Q5V5X4;4.A.2.1.7_Q1LZ59;4.A.2.1.8_Q1LZ68;4.A.2.1.9_Q1R4S9	PTS system, fructose-specific IIA component [EC:2.7.1.69]
fru1EIIB	K02769	2.7.1.69	4.A.2.1.14_D2RXA4;4.A.2.1.15_D4GYE1;4.A.2.1.22_Q3JZE2;4.A.2.1.26_Q5V5X1;4.A.2.1.7_Q1LZ59;4.A.2.1.9_Q8FC73	PTS system, fructose-specific IIB component [EC:2.7.1.69]
fru1EIIC	K02770		4.A.2.1.13_Q0S1N2;4.A.2.1.14_D2RXA8;4.A.2.1.15_D4GYE5;4.A.2.1.16_Q9RMF5;4.A.2.1.17_Q9HY57;4.A.2.1.18_Q9RZP7;4.A.2.1.19_M7PF02;4.A.2.1.1_P20966;4.A.2.1.20_Q3K0G6;4.A.2.1.21_F8Y3B5;4.A.2.1.22_Q3JZE4;4.A.2.1.23_T5HN74;4.A.2.1.26_q5v5x5;4.A.2.1.4_P71012;4.A.2.1.6_O31645;4.A.2.1.7_Q1LZ59;4.A.2.1.8_Q8DWE7;4.A.2.1.9_Q1R4T1	PTS system, fructose-specific IIC component
fru2EIIA	K11201	2.7.1.69	4.A.2.1.25_P32155	PTS system, fructose-specific IIA-like component [EC:2.7.1.69]
fru2EIIB	K11202	2.7.1.69	4.A.2.1	PTS system, fructose-specific IIB-like component [EC:2.7.1.69]
fru2EIIC	K11203		4.A.2.1.25_P32154	PTS system, fructose-specific IIC-like component
fruB	K11183		4.A.1.1.15_Q9HXN5;4.A.2.1.17_Q9HY55;4.A.2.1.19_M7QAG8;4.A.2.1.1_P69811	phosphocarrier protein FPr
fruK	K00882	2.7.1.56		1-phosphofructokinase [EC:2.7.1.56]
frvX	K18530	3.4.11.-		frvX; putative aminopeptidase FrvX [EC:3.4.11.-]	Metallo peptidases_Family M42: glutamyl aminopeptidase family;M42
ftfL	K01938	6.3.4.3		formate--tetrahydrofolate ligase [EC:6.3.4.3]
ftr	K00672	2.3.1.101		formylmethanofuran--tetrahydromethanopterin N-formyltransferase [EC:2.3.1.101]
ftrA	K07230		2.A.108.2.10;2.A.108.2.4;2.A.108.2.9	periplasmic iron binding protein
fucA	K01628	4.1.2.17		L-fuculose-phosphate aldolase [EC:4.1.2.17]
fucI	K01818	5.3.1.25;5.3.1.3		L-fucose/D-arabinose isomerase [EC:5.3.1.25 5.3.1.3]
fucK	K00879	2.7.1.51		L-fuculokinase [EC:2.7.1.51]
fumalpha	K01677	4.2.1.2		fumarate hydratase subunit alpha [EC:4.2.1.2]
fumbeta	K01678	4.2.1.2		fumarate hydratase subunit beta [EC:4.2.1.2]
fumI	K01676	4.2.1.2		fumarate hydratase, class I [EC:4.2.1.2]
fumII	K01679	4.2.1.2		fumarate hydratase, class II [EC:4.2.1.2]
fur	K03711			Fur family transcriptional regulator, ferric uptake regulator
fwdA	K00200	1.2.7.12		formylmethanofuran dehydrogenase subunit A [EC:1.2.7.12]
fwdB	K00201	1.2.7.12		formylmethanofuran dehydrogenase subunit B [EC:1.2.7.12]
fwdC	K00202	1.2.7.12		formylmethanofuran dehydrogenase subunit C [EC:1.2.7.12]
fwdD	K00203	1.2.7.12		formylmethanofuran dehydrogenase subunit D [EC:1.2.7.12]
fwdE	K11261	1.2.7.12		formylmethanofuran dehydrogenase subunit E [EC:1.2.7.12]
fwdF	K00205			4Fe-4S ferredoxin
fwdG	K11260			4Fe-4S ferredoxin
fwdH	K00204			4Fe-4S ferredoxin
g6p	K01084	3.1.3.9		G6PC; glucose-6-phosphatase [EC:3.1.3.9]
gadAB	K01580	4.1.1.15		glutamate decarboxylase [EC:4.1.1.15]
gadC	K20265		2.A.3.7.1;2.A.3.7.3	glutamate:GABA antiporter
galE	K01784	5.1.3.2		UDP-glucose 4-epimerase [EC:5.1.3.2]
galEIIA	K20112	2.7.1.204	4.A.5	PTS system, galactose-specific IIA component [EC:2.7.1.204]
galEIIB	K20113	2.7.1.204	4.A.5	PTS system, galactose-specific IIB component [EC:2.7.1.204]
galEIIC	K20114		4.A.5	PTS system, galactose-specific IIC component
galK	K00849	2.7.1.6		galactokinase [EC:2.7.1.6]
galM	K01785	5.1.3.3		aldose 1-epimerase [EC:5.1.3.3]
galP	K08137		2.A.1.1.1_P0AEP1;2.A.1.1.2_P0AE24	MFS transporter, SP family, galactose:H+ symporter
galT	K00965	2.7.7.12		UDPglucose--hexose-1-phosphate uridylyltransferase [EC:2.7.7.12]
gamEIIB	K10984	2.7.1.69	4.A.6.1.5_P42909	PTS system, galactosamine-specific IIB component [EC:2.7.1.69]
gamEIIC	K10985		4.A.6.1.5_Q9KIP7	PTS system, galactosamine-specific IIC component
gamEIID	K10986		4.A.6.1.5_P42911	PTS system, galactosamine-specific IID component
ganO	K15770		3.A.1.1.16_P58300;3.A.1.1.26_O06989;3.A.1.1.27_Q8DT28;3.A.1.1.44_Q7AKP1	arabinogalactan oligomer / maltooligosaccharide transport system substrate-binding protein
ganP	K15771		3.A.1.1.16_Q8TZP9;3.A.1.1.26_O06990;3.A.1.1.27_Q8DT27;3.A.1.1.44_Q9KZ07;3.A.1.1.51_Q6MNM0	arabinogalactan oligomer / maltooligosaccharide transport system permease protein
ganQ	K15772		3.A.1.1.16_Q8TZQ0;3.A.1.1.26_O06991;3.A.1.1.27_Q8DT26;3.A.1.1.44_Q9KZ08	arabinogalactan oligomer / maltooligosaccharide transport system permease protein
gapA.NAD+	K00134	1.2.1.12		glyceraldehyde 3-phosphate dehydrogenase [EC:1.2.1.12]
gapA.NADP+	K00150	1.2.1.59		glyceraldehyde-3-phosphate dehydrogenase (NAD(P)) [EC:1.2.1.59]
gapdhs	K10705	1.2.1.12		glyceraldehyde-3-phosphate dehydrogenase, spermatogenic [EC:1.2.1.12]
gapor	K11389	1.2.7.6		gapor; glyceraldehyde-3-phosphate dehydrogenase (ferredoxin) [EC:1.2.7.6]
gatEIIA	K02773	2.7.1.69	4.A.5.1.1_P69828;4.A.5.1.2_Q71WA4;4.A.5.1.4_Q8FCM6;4.A.5.1.5_D4GUP9;4.A.5.1.6_C9MZ76	PTS system, galactitol-specific IIA component [EC:2.7.1.69]
gatEIIB	K02774	2.7.1.69	4.A.5.1.1_P37188;4.A.5.1.2_Q71WA5;4.A.5.1.4_Q8FCM5;4.A.5.1.5_D4GUQ1;4.A.5.1.6_C9MZ78	PTS system, galactitol-specific IIB component [EC:2.7.1.69]
gatEIIC	K02775		4.A.5.1.1_P69831;4.A.5.1.2_Q71WA6;4.A.5.1.4_Q8FCM4;4.A.5.1.5_D4GUQ0;4.A.5.1.6_C9MZ79	PTS system, galactitol-specific IIC component
gcd	K00117	1.1.5.2		gcd; quinoprotein glucose dehydrogenase [EC:1.1.5.2]
gck	K11529	2.7.1.165		glycerate 2-kinase [EC:2.7.1.165]
gdh2	K15371	1.4.1.2		glutamate dehydrogenase [EC:1.4.1.2]
gdhA	K18124	1.1.1.360		gdh2, gdhA; glucose/galactose 1-dehydrogenase (NADP+) [EC:1.1.1.360]
gdhA_1	K00261	1.4.1.3		glutamate dehydrogenase (NAD(P)+) [EC:1.4.1.3]
gdhA_2	K00262	1.4.1.4		glutamate dehydrogenase (NADP+) [EC:1.4.1.4]
gesB	K19594		2.A.6.2.25;2.A.6.2.34	gold/copper resistance efflux pump
gfa	K03396	4.4.1.22		S-(hydroxymethyl)glutathione synthase [EC:4.4.1.22]
gfrEIIA	K19506	2.7.1.69	4.A.6.1.19_V7IHL6	PTS system, fructoselysine and glucoselysine-specific IIA component [EC:2.7.1.69]
gfrEIIB	K19507	2.7.1.69	4.A.6.1.19_V7IFY8;4.A.6.1.23_C1A8G1	PTS system, fructoselysine and glucoselysine-specific IIB component [EC:2.7.1.69]
gfrEIIC	K19508		4.A.6.1.19_V7RE14;4.A.6.1.22_T4NBW3;4.A.6.1.9_Q97N93	PTS system, fructoselysine and glucoselysine-specific IIC component
gfrEIID	K19509		4.A.6.1.19_V7RGM6	PTS system, fructoselysine and glucoselysine-specific IID component
ggt	K00681	2.3.2.2;3.4.19.13		ggt; gamma-glutamyltranspeptidase / glutathione hydrolase [EC:2.3.2.2 3.4.19.13]	Threonine peptidases_Family T3: gamma-glutamyltransferase family;T3
gguA	K10548		3.A.1.2.22_Q8G3R0;3.A.1.2.5_O05176	putative multiple sugar transport system ATP-binding protein
gguP	K10547		3.A.1.2.22_Q8G3Q9;3.A.1.2.5_O05177	putative multiple sugar transport system permease protein
gguS	K10546		3.A.1.2.22_Q8G3R1;3.A.1.2.5_P25548	putative multiple sugar transport system substrate-binding protein
GH1				glycoside hydrolase CAZy family 1
GH10				glycoside hydrolase CAZy family 10
GH11				glycoside hydrolase CAZy family 11
GH110				glycoside hydrolase CAZy family 110
GH113				glycoside hydrolase CAZy family 113
GH116				glycoside hydrolase CAZy family 116
GH12				glycoside hydrolase CAZy family 12
GH120				glycoside hydrolase CAZy family 120
GH124				glycoside hydrolase CAZy family 124
GH134				glycoside hydrolase CAZy family 134
GH16				glycoside hydrolase CAZy family 16
GH18				glycoside hydrolase CAZy family 18
GH19				glycoside hydrolase CAZy family 19
GH2				glycoside hydrolase CAZy family 2
GH20				glycoside hydrolase CAZy family 20
GH23				glycoside hydrolase CAZy family 23
GH26				glycoside hydrolase CAZy family 26
GH27				glycoside hydrolase CAZy family 27
GH3				glycoside hydrolase CAZy family 3
GH30				glycoside hydrolase CAZy family 30
GH31				glycoside hydrolase CAZy family 31
GH36				glycoside hydrolase CAZy family 36
GH39				glycoside hydrolase CAZy family 39
GH4				glycoside hydrolase CAZy family 4
GH43				glycoside hydrolase CAZy family 43
GH44				glycoside hydrolase CAZy family 44
GH45				glycoside hydrolase CAZy family 45
GH48				glycoside hydrolase CAZy family 48
GH5				glycoside hydrolase CAZy family 5
GH51				glycoside hydrolase CAZy family 51
GH52				glycoside hydrolase CAZy family 52
GH54				glycoside hydrolase CAZy family 54
GH6				glycoside hydrolase CAZy family 6
GH62				glycoside hydrolase CAZy family 62
GH7				glycoside hydrolase CAZy family 7
GH74				glycoside hydrolase CAZy family 74
GH79				glycoside hydrolase CAZy family 79
GH8				glycoside hydrolase CAZy family 8
GH9				glycoside hydrolase CAZy family 9
GH97				glycoside hydrolase CAZy family 97
GH98				glycoside hydrolase CAZy family 98
gk	K00851	2.7.1.12		E2.7.1.12, gntK, idnK; gluconokinase [EC:2.7.1.12]
glc1EIIA	K02777	2.7.1.69	4.A.1.1.1_P69783;4.A.3.2.5_Q8L3C4	PTS system, glucose-specific IIA component [EC:2.7.1.69]
glc1EIIB	K02778	2.7.1.69	4.A.1.1.1	PTS system, glucose-specific IIB component [EC:2.7.1.69]
glc1EIIC	K02779		4.A.1.1.11_Q8DS05;4.A.1.1.12_Q48WG5;4.A.1.1.17_Q63GK8;4.A.1.1.18_O51590;4.A.1.1.1_P69786	PTS system, glucose-specific IIC component
glc2EIIA	K20116		4.A.1.1.9;4.A.1.1.13;4.A.1.1.14	PTS system, glucose-specific IIA component
glc2EIIB	K20117		4.A.1.1.9;4.A.1.1.13;4.A.1.1.14	PTS system, glucose-specific IIB component
glc2EIIC	K20118		4.A.1.1.9;4.A.1.1.13;4.A.1.1.14	glucose PTS system EIICBA or EIICB component
glcA	K10199		3.A.1.1.13_Q97UY8;3.A.1.1.14_Q97UF2	glucose/arabinose transport system ATP-binding protein
glcP	K10197		3.A.1.1.13_Q97UZ0;3.A.1.1.14_Q97UF4	glucose/arabinose transport system permease protein
glcP1	K10198		3.A.1.1.13_Q97UY9;3.A.1.1.14_Q97UF3	glucose/arabinose transport system permease protein
glcS	K10196		3.A.1.1.13_Q97UZ1;3.A.1.1.14_Q97UF5	glucose/arabinose transport system substrate-binding protein
glcT1	K08174		2.A.1.7.3_O07563	MFS transporter, FHS family, glucose/mannose:H+ symporter
glcU	K05340		2.A.7.5.1_O07881;2.A.7.5.3_Q9CDF7;2.A.7.5.4_P40420;2.A.7.5.5_L8DP77	glucose uptake protein
gld	K00115	1.1.5.9		GLD; glucose 1-dehydrogenase (FAD, quinone) [EC:1.1.5.9]
gldA	K00005	1.1.1.6		glycerol dehydrogenase [EC:1.1.1.6]
glf	K13854		2.A.1.1.4_P21906	MFS transporter, SP family, glucose uniporter
glk	K00845	2.7.1.2		glk; glucokinase [EC:2.7.1.2]
glnA	K01915	6.3.1.2		glutamine synthetase [EC:6.3.1.2]
glnH	K10036		3.A.1.3.2_P0AEQ3	glutamine transport system substrate-binding protein
glnP	K10037		3.A.1.3.2_P0AEQ6	glutamine transport system permease protein
glnQ	K10038	3.6.3.-	3.A.1.3.2_P10346	glutamine transport system ATP-binding protein [EC:3.6.3.-]
glpE	K02439	2.8.1.1		thiosulfate sulfurtransferase [EC:2.8.1.1]
glpF	K02440		1.A.8.1.1_P0AER0;1.A.8.13.2_Q9C4Z5;1.A.8.2.1_P18156;1.A.8.2.2_P22094;1.A.8.2.3_P52280;1.A.8.2.4_C6VJ63;1.A.8.2.5_D7V7W8;1.A.8.2.6_D7V8E7;1.A.8.2.7_D7VEY8;1.A.8.2.8_D7VC84;1.A.8.2.9_D0JBC9	glycerol uptake facilitator protein
glpP	K17322		3.A.1.1.35_G3LHZ0	glycerol transport system permease protein
glpQ	K17323		3.A.1.1.35_G3LHZ1	glycerol transport system permease protein
glpS	K17324		3.A.1.1.35_G3LHY8	glycerol transport system ATP-binding protein
glpT	K17325		3.A.1.1.35_G3LHY9	glycerol transport system ATP-binding protein
glpV	K17321		3.A.1.1.35_G3LHZ3	glycerol transport system substrate-binding protein
glsA	K01425	3.5.1.2		glutaminase [EC:3.5.1.2]
gltA	K01647	2.3.3.1		CS, gltA; citrate synthase [EC:2.3.3.1]
gltB	K00265	1.4.1.13		glutamate synthase (NADPH) large chain [EC:1.4.1.13]
gltD	K00266	1.4.1.13		glutamate synthase (NADPH) small chain [EC:1.4.1.13]
gltI	K10001		3.A.1.3.19_Q88NY2;3.A.1.3.22_Q9I402;3.A.1.3.4_P37902	glutamate/aspartate transport system substrate-binding protein
gltJ	K10003		3.A.1.3.19_Q88NY3;3.A.1.3.22_Q9I403;3.A.1.3.4_P0AER3	glutamate/aspartate transport system permease protein
gltK	K10002		3.A.1.3.19_Q88NY4;3.A.1.3.22_Q9I404;3.A.1.3.4_P0AER5	glutamate/aspartate transport system permease protein
gltL	K10004	3.6.3.-	3.A.1.3.19_Q88NY5;3.A.1.3.22_Q9I405;3.A.1.3.4_P0AAG3	glutamate/aspartate transport system ATP-binding protein [EC:3.6.3.-]
gltP	K11102		2.A.23.1.1_P21345;2.A.23.1.2_P24943	proton glutamate symport protein
gltS1	K00284	1.4.7.1		glutamate synthase (ferredoxin) [EC:1.4.7.1]
gltS2	K03312		2.A.27.1.1_P0AER8;2.A.27.1.2_P73275;2.A.27.1.3_Q9HZ58;2.A.27.2.1_B1XKD9;2.A.27.2.2_M1QJN9	glutamate:Na+ symporter, ESS family
gluA	K10008	3.6.3.-	3.A.1.3.9_P48243	glutamate transport system ATP-binding protein [EC:3.6.3.-]
gluB	K10005		3.A.1.3.9_P48242	glutamate transport system substrate-binding protein
gluC	K10006		3.A.1.3.9_P48244	glutamate transport system permease protein
glucP	K02429		2.A.1.7.10_A1S5F4;2.A.1.7.11_A1S297;2.A.1.7.1_P11551;2.A.1.7.2_P0C105;2.A.1.7.5_Q8XEV7;2.A.1.7.7_O25788	MFS transporter, FHS family, L-fucose permease
gluD	K10007		3.A.1.3.9_P48245	glutamate transport system permease protein
gluP	K19225	3.4.21.105		gluP; rhomboid protease GluP [EC:3.4.21.105]	Serine peptidases_Family S54: Rhomboid family;S54
glvEIIB	K02749	2.7.1.69	4.A.1.1.4;4.A.1.1.8;4.A.1.1.10;4.A.1.1.16;4.A.1.1.19	PTS system, arbutin-like IIB component [EC:2.7.1.69]
glvEIIC	K02750		4.A.1.1.10_Q9AGA7;4.A.1.1.16_C7NB69;4.A.1.1.19_ART98514;4.A.1.1.4_O06900;4.A.1.1.8_P54715	PTS system, arbutin-like IIC component
glyA	K00600	2.1.2.1		glycine hydroxymethyltransferase [EC:2.1.2.1]
glycA	K02550		2.A.14.1.2_Q46839;2.A.14.1.3_P71067	glycolate permease
gnl	K01053	3.1.1.17		E3.1.1.17, gnl, RGN; gluconolactonase [EC:3.1.1.17]
gntP	K16321		2.A.8.1.3_P0AC94	high-affinity gluconate transporter
gntT	K06155		2.A.8.1.4	Gnt-I system high-affinity gluconate transporter
gntU	K06156		2.A.8.1.8	Gnt-I system low-affinity gluconate transporter
gpd	K00036	1.1.1.49;1.1.1.363		G6PD, zwf; glucose-6-phosphate 1-dehydrogenase [EC:1.1.1.49 1.1.1.363]
gpmA	K01834	5.4.2.11		PGAM, gpmA; 2,3-bisphosphoglycerate-dependent phosphoglycerate mutase [EC:5.4.2.11]
gpmB	K15634	5.4.2.12		probable phosphoglycerate mutase [EC:5.4.2.12]
gpmI	K15633	5.4.2.12		gpmI; 2,3-bisphosphoglycerate-independent phosphoglycerate mutase [EC:5.4.2.12]
gpr	K06012	3.4.24.78		gpr; spore protease [EC:3.4.24.78]	Aspartic peptidases_Family A25: gpr protease family;A25
graA	K20942	1.14.14.27		resorcinol 4-hydroxylase (FADH2) [EC:1.14.14.27]
groEL	K04077			chaperonin GroEL, HSP60	1
groES	K04078			chaperonin GroES, HSP10	1
grpE	K03687			molecular chaperone GrpE, HSP24	1
gsiA	K13892		3.A.1.5.11	glutathione transport system ATP-binding protein
gsiB	K13889		3.A.1.5.11	glutathione transport system substrate-binding protein
gsiC	K13890		3.A.1.5.11	glutathione transport system permease protein
gsiD	K13891		3.A.1.5.11	glutathione transport system permease protein
gtsA	K17315		3.A.1.1.24_Q72KX2;3.A.1.1.30_Q88P38	glucose/mannose transport system substrate-binding protein
gtsB	K17316		3.A.1.1.24_Q72KX3;3.A.1.1.30_Q88P37	glucose/mannose transport system permease protein
gtsC	K17317		3.A.1.1.14_Q97UF3;3.A.1.1.24_Q72KX4;3.A.1.1.30_Q88P36	glucose/mannose transport system permease protein
gudB	K00260	1.4.1.2		glutamate dehydrogenase [EC:1.4.1.2]
gutA	K16248		2.A.2	probable glucitol transport protein GutA
gutEIIA	K02781	2.7.1.69	4.A.4.1.1_P05706;4.A.4.1.2_O32334	PTS system, glucitol/sorbitol-specific IIA component [EC:2.7.1.69]
gutEIIB	K02782	2.7.1.69	4.A.4.1	PTS system, glucitol/sorbitol-specific IIB component [EC:2.7.1.69]
gutEIIC	K02783		4.A.4.1.1_P56579;4.A.4.1.1_P56580;4.A.4.1.2_O32332;4.A.4.1.2_O32333	PTS system, glucitol/sorbitol-specific IIC component
h3cl	K18594	6.2.1.-		3-hydroxypropionyl-CoA synthetase (ADP-forming) [EC:6.2.1.-]
h6pd	K13937	1.1.1.47;3.1.1.31		H6PD; hexose-6-phosphate dehydrogenase [EC:1.1.1.47 3.1.1.31]
hadh	K00022	1.1.1.35		3-hydroxyacyl-CoA dehydrogenase [EC:1.1.1.35]
hao	K10535	1.7.2.6		hydroxylamine dehydrogenase [EC:1.7.2.6]
hasA	K12545		1.B.14.5	heme acquisition protein HasA
hasR	K16152		1.B.14.7.1	heme acquisition protein HasR
hbd	K00074	1.1.1.157		3-hydroxybutyryl-CoA dehydrogenase [EC:1.1.1.157]
hcaT	K05820		2.A.1.65.9_Q45632	MFS transporter, PPP family, 3-phenylpropionic acid transporter
hdeA	K19777			acid stress chaperone HdeA
hdeB	K19778			acid stress chaperone HdeB
hdh	K20935	1.7.2.8		hydrazine dehydrogenase [EC:1.7.2.8]
hdrA1	K22480	1.8.7.3		heterodisulfide reductase subunit A1 [EC:1.8.7.3]
hdrA2	K03388	1.8.7.3;1.8.98.4;1.8.98.5;1.8.98.6		heterodisulfide reductase subunit A2 [EC:1.8.7.3 1.8.98.4 1.8.98.5 1.8.98.6]
hdrB1	K22481	1.8.7.3		heterodisulfide reductase subunit B1 [EC:1.8.7.3]
hdrB2	K03389	1.8.7.3;1.8.98.4;1.8.98.5;1.8.98.6		heterodisulfide reductase subunit B2 [EC:1.8.7.3 1.8.98.4 1.8.98.5 1.8.98.6]
hdrC1	K22482	1.8.7.3		heterodisulfide reductase subunit C1 [EC:1.8.7.3]
hdrC2	K03390	1.8.7.3;1.8.98.4;1.8.98.5;1.8.98.6		heterodisulfide reductase subunit C2 [EC:1.8.7.3 1.8.98.4 1.8.98.5 1.8.98.6]
hdrD	K08264	1.8.98.1		heterodisulfide reductase subunit D [EC:1.8.98.1]
hdrE	K08265	1.8.98.1		heterodisulfide reductase subunit E [EC:1.8.98.1]
hflB	K03798	3.4.24.-		ftsH, hflB; cell division protease FtsH [EC:3.4.24.-]	Metallo peptidases_Family M41: FtsH endopeptidase family;M41
hgdD	K03287		1.B.17.2.10_V5V5Z3;3.A.1.114.1_Q8YT39	outer membrane factor, OMF family
hhoB	K04691	3.4.21.-		hhoB, degS; serine protease DegS [EC:3.4.21.-]	Serine peptidases_Family S1: chymotrypsin family;S1
hicdh	K17753	1.1.1.286		HICDH; isocitrate--homoisocitrate dehydrogenase [EC:1.1.1.286]
hisJ	K10014		3.A.1.3.11_O50181;3.A.1.3.1_P09551;3.A.1.3.29_P09551;3.A.1.3.29_P0AEU0	histidine transport system substrate-binding protein
hisM	K10015		3.A.1.3.11_O50183;3.A.1.3.1_P0A2I7;3.A.1.3.29_P0AEU3	histidine transport system permease protein
hisP	K10017	3.6.3.21	3.A.1.3.11_O30506;3.A.1.3.1_P02915;3.A.1.3.29_P07109	histidine transport system ATP-binding protein [EC:3.6.3.21]
hisQ	K10016		3.A.1.3.11_O50182;3.A.1.3.1_P0A2I9;3.A.1.3.29_P52094	histidine transport system permease protein
hk	K00844	2.7.1.1		HK; hexokinase [EC:2.7.1.1]
hmd	K13942	1.12.98.2		5,10-methenyltetrahydromethanopterin hydrogenase [EC:1.12.98.2]
hmeC	K18500			heterodisulfide reductase cytochrome b-like subunit
hmeD	K18501			heterodisulfide reductase iron-sulfur subunit
hndA	K18330	1.12.1.3		NADP-reducing hydrogenase subunit HndA [EC:1.12.1.3]
hndB	K17992	1.12.1.3		NADP-reducing hydrogenase subunit HndB [EC:1.12.1.3]
hndC	K18331	1.12.1.3		NADP-reducing hydrogenase subunit HndC [EC:1.12.1.3]
hndD	K18332	1.12.1.3		NADP-reducing hydrogenase subunit HndD [EC:1.12.1.3]
hofD	K02506	3.4.23.43		hofD, hopD; leader peptidase HopD [EC:3.4.23.43]	Aspartic peptidases_Family A24: type IV prepilin peptidase family;A24
hoxE	K05586	7.1.1.2		hoxE; bidirectional [NiFe] hydrogenase diaphorase subunit [EC:7.1.1.2]
hoxF_1	K05587	7.1.1.2		hoxF; bidirectional [NiFe] hydrogenase diaphorase subunit [EC:7.1.1.2]
hoxF_2	K18005	1.12.1.2		[NiFe] hydrogenase diaphorase moiety large subunit [EC:1.12.1.2]
hoxH	K00436	1.12.1.2		NAD-reducing hydrogenase large subunit [EC:1.12.1.2]
hoxU_1	K05588	7.1.1.2		hoxU; bidirectional [NiFe] hydrogenase diaphorase subunit [EC:7.1.1.2]
hoxU_2	K18006	1.12.1.2		[NiFe] hydrogenase diaphorase moiety small subunit [EC:1.12.1.2]
hoxY	K18007	1.12.1.2		NAD-reducing hydrogenase small subunit [EC:1.12.1.2]
hpd	K15039	1.1.1.298		3-hydroxypropionate dehydrogenase (NADP+) [EC:1.1.1.298]
hppA	K15987			K(+)-stimulated pyrophosphate-energized sodium pump
hpr	K11189		4.A.1.1.15_Q9HXN5;4.A.2.1.19_M7QAG8;4.A.2.1.26_Q5V5X3	phosphocarrier protein
hprA	K00018	1.1.1.29		glycerate dehydrogenase [EC:1.1.1.29]
hps-phi	K13831	4.1.2.43;5.3.1.27		3-hexulose-6-phosphate synthase / 6-phospho-3-hexuloisomerase [EC:4.1.2.43 5.3.1.27]
hpt	K02445		2.A.1.4.6_Q9Z7N9	MFS transporter, OPA family, glycerol-3-phosphate transporter
hpxW	K22602	3.5.1.126		hpxW; oxamate amidohydrolase [EC:3.5.1.126]	Threonine peptidases_Family T3: gamma-glutamyltransferase family;T3
hrcA	K03705			heat-inducible transcriptional repressor
hrtA	K09814	3.6.3.-	3.A.1	hemin transport system ATP-binding protein [EC:3.6.3.-]
hrtB	K09813		3.A.1	hemin transport system permease protein
hscA	K04044			molecular chaperone HscA, HSP70
hscC	K04045			molecular chaperone HscC, HSP70
hslU	K03667			ATP-dependent HslUV protease ATP-binding subunit HslU, HSP100	1
hslV	K01419	3.4.25.2		hslV, clpQ; ATP-dependent HslUV protease, peptidase subunit HslV [EC:3.4.25.2]	Threonine peptidases_Family T1: proteasome family;T1
hupU	K23548	1.12.99.6		uptake hydrogenase small subunit [EC:1.12.99.6]
hupV	K23549	1.12.99.6		uptake hydrogenase large subunit [EC:1.12.99.6]
hutM	K16236		2.A.3.1	histidine permease
hutT	K16234		2.A.3.1.9_O31199	histidine transporter
hxlA	K08093	4.1.2.43		3-hexulose-6-phosphate synthase [EC:4.1.2.43]
hxlB	K08094	5.3.1.27		6-phospho-3-hexuloisomerase [EC:5.3.1.27]
hxt	K08139		2.A.1.1.32_P15729;2.A.1.1.35_Q7BEC4;2.A.1.1.81_Q0SE66	MFS transporter, SP family, sugar:H+ symporter
hyaA	K06282	1.12.99.6		hydrogenase small subunit [EC:1.12.99.6]
hyaB	K06281	1.12.99.6		hydrogenase large subunit [EC:1.12.99.6]
hyaC	K03620			Ni/Fe-hydrogenase 1 B-type cytochrome subunit
hyaD	K03605	3.4.23.-		hyaD, hybD; hydrogenase maturation protease [EC:3.4.23.-]	Aspartic peptidases_Family A31: HybD endopeptidase family;A31
hycI	K08315	3.4.23.51		hycI; hydrogenase 3 maturation protease [EC:3.4.23.51]	Aspartic peptidases_Family A31: HybD endopeptidase family;A31
hydA_1	K17993	1.12.1.3;1.12.1.5		sulfhydrogenase subunit alpha [EC:1.12.1.3 1.12.1.5]
hydA_2	K17997	1.12.1.4		iron-hydrogenase subunit alpha [EC:1.12.1.4]
hydA_3	K18008	1.12.2.1		[NiFe] hydrogenase small subunit [EC:1.12.2.1]
hydA_4	K05927	1.12.5.1		quinone-reactive Ni/Fe-hydrogenase small subunit [EC:1.12.5.1]
hydB_3	K00437	1.12.2.1		[NiFe] hydrogenase large subunit [EC:1.12.2.1]
hydB_4	K05922	1.12.5.1		quinone-reactive Ni/Fe-hydrogenase large subunit [EC:1.12.5.1]
hydB_2	K17998	1.12.1.4		iron-hydrogenase subunit beta [EC:1.12.1.4]
hydB_1	K17996	1.12.98.4		sulfhydrogenase subunit beta (sulfur reductase) [EC:1.12.98.4]
hydD	K17994	1.12.1.3;1.12.1.5		sulfhydrogenase subunit delta [EC:1.12.1.3 1.12.1.5]
hydG	K17995	1.12.98.4		sulfhydrogenase subunit gamma (sulfur reductase) [EC:1.12.98.4]
hydt	K15019	4.2.1.116		3-hydroxypropionyl-coenzyme A dehydratase [EC:4.2.1.116]
hyfE	K12140	1.-.-.-		hydrogenase-4 component E [EC:1.-.-.-]
hys	K15018	6.2.1.36		3-hydroxypropionyl-coenzyme A synthetase [EC:6.2.1.36]
hzsA	K20934	1.7.2.7		hydrazine synthase subunit [EC:1.7.2.7]
hzsB	K20933	1.7.2.7		hydrazine synthase subunit [EC:1.7.2.7]
hzsC	K20932	1.7.2.7		hydrazine synthase subunit [EC:1.7.2.7]
iaaA	K13051	3.5.1.1 3.4.19.5		ASRGL1, iaaA; L-asparaginase / beta-aspartyl-peptidase [EC:3.5.1.1 3.4.19.5]	Threonine peptidases_Family T2;T2
iadA	K01305	3.4.19.-		iadA; beta-aspartyl-dipeptidase (metallo-type) [EC:3.4.19.-]	Metallo peptidases_Family M38: beta-aspartyl dipeptidase family;M38
iatA1	K17210		3.A.1.2.21	inositol transport system ATP-binding protein
iatA2	K17215		3.A.1.2	inositol transport system ATP-binding protein
iatP1	K17209		3.A.1.2.21	inositol transport system permease protein
iatP2	K17214		3.A.1.2	inositol transport system permease protein
ibpA	K04080			molecular chaperone IbpA, HSP20
ibpA1	K17208		3.A.1.2.21	inositol transport system substrate-binding protein
ibpA2	K17213		3.A.1.2	inositol transport system substrate-binding protein
ibpB	K04081			molecular chaperone IbpB, HSP20
icd	K00031	1.1.1.42		IDH1, IDH2, icd; isocitrate dehydrogenase [EC:1.1.1.42]
icsP	K13520	3.4.23.-		icsP, sopA; outer membrane protease [EC:3.4.23.-]	Aspartic peptidases_Family A26: omptin family;A26
idh3	K00030	1.1.1.41		IDH3; isocitrate dehydrogenase (NAD+) [EC:1.1.1.41]
idnT	K06157		2.A.8.1.2	Gnt-II system L-idonate transporter
iga_hap	K01347	3.4.21.72		iga; IgA-specific serine endopeptidase [EC:3.4.21.72]	Serine peptidases_Family S6;S6
iga_zmpA	K01390	3.4.24.13		iga; IgA-specific metalloendopeptidase [EC:3.4.24.13]	Metallo peptidases_Family M26;M26
impA	K21429			impA; immunomodulating metalloprotease	Metallo peptidases_Family M88;M88
inoE	K17237		3.A.1.1.38	inositol-phosphate transport system substrate-binding protein
inoF	K17238		3.A.1.1.38	inositol-phosphate transport system permease protein
inoG	K17239		3.A.1.1.38	inositol-phosphate transport system permease protein
inoK	K17240		3.A.1.1.13_Q97UY8;3.A.1.1.14_Q97UF2	inositol-phosphate transport system ATP-binding protein
iolF	K06610		2.A.1.1.74_Q926Q9	MFS transporter, SP family, inositol transporter
iorA	K07302	1.3.99.16		isoquinoline 1-oxidoreductase subunit alpha [EC:1.3.99.16]
iorB	K07303	1.3.99.16		isoquinoline 1-oxidoreductase subunit beta [EC:1.3.99.16]
isopadh	K23259	1.1.1.80		isopropanol dehydrogenase (NADP+) [EC:1.1.1.80]
isp	K13275	3.4.21.-		isp; major intracellular serine protease [EC:3.4.21.-]	Serine peptidases_Family S8: subtilisin family;S8
jgt	K22451	2.4.1.25		4-alpha-glucanotransferase [EC:2.4.1.25]
ylbL	K07177			K07177; Lon-like protease	Serine peptidases_Family S16: lon protease family;S16
aprE2	K14645	3.4.21.-		K14645; serine protease [EC:3.4.21.-]	Serine peptidases_Family S8: subtilisin family;S8
katE	K03781	1.11.1.6		catalase [EC:1.11.1.6]
katG	K03782	1.11.1.21		catalase-peroxidase [EC:1.11.1.21]	1
kdgM	K22110		1.B.35.1;1.B.35.2	oligogalacturonate-specific porin family protein
kdgT	K02526		2.A.10.1	2-keto-3-deoxygluconate permease
kdpgA	K11395	4.1.2.55		2-dehydro-3-deoxy-phosphogluconate/2-dehydro-3-deoxy-6-phosphogalactonate aldolase [EC:4.1.2.55]
kgtP	K03761		2.A.1.6.2_P0AEX3	MFS transporter, MHS family, alpha-ketoglutarate permease
kpsE	K10107		3.A.1.101	capsular polysaccharide transport system permease protein
kpsM	K09688		3.A.1.101	capsular polysaccharide transport system permease protein
kpsT	K09689		3.A.1.101	capsular polysaccharide transport system ATP-binding protein
kup	K03549		2.A.72	KUP system potassium uptake protein
lacE	K10188		3.A.1.1.4_P29822	lactose/L-arabinose transport system substrate-binding protein
lacEIIA	K02786	2.7.1.69	4.A.3.1.1_P0A0D6;4.A.3.1.2_Q045X4;4.A.3.1.3_Q045H4	PTS system, lactose-specific IIA component [EC:2.7.1.69]
lacEIIB	K02787	2.7.1.69	4.A.3.1.1;4.A.3.1.2;4.A.3.1.3	PTS system, lactose-specific IIB component [EC:2.7.1.69]
lacEIIC	K02788		4.A.3.1.1_P11162;4.A.3.1.2_Q045X3;4.A.3.1.3_Q045H3	PTS system, lactose-specific IIC component
lacF	K10189		3.A.1.1.4_P29823	lactose/L-arabinose transport system permease protein
lacG	K10190		3.A.1.1.4_P29824	lactose/L-arabinose transport system permease protein
lacK	K10191		3.A.1.1.4_Q01937	lactose/L-arabinose transport system ATP-binding protein
lacS	K16209		2.A.2.2.1_P23936;2.A.2.2.2_P43466	lactose/raffinose/galactose permease
lacY	K02532		2.A.1.5.1_P02920;2.A.1.5.2_P16552;2.A.1.5.3_P30000;2.A.1.5.4_P96517	MFS transporter, OHS family, lactose permease
lamB	K02024		1.B.3.1.1_P02943;1.B.3.1.4_F5ZA77	maltoporin
lasA	K08642	3.4.24.-		lasA; LasA protease [EC:3.4.24.-]	Metallo peptidases_Family M23;M23
lctB	K08713		1.A.1.1	potassium channel LctB
lctP1	K00427		2.A.14.1.1_P33231;2.A.14.1.3_P71067	L-lactate permease
lctP2	K03303		2.A.14.1.2_Q46839;2.A.14.1.3_P71067	lactate permease
ldcA	K01297	3.4.17.13		ldcA; muramoyltetrapeptide carboxypeptidase [EC:3.4.17.13]	Serine peptidases_Family S66;S66
ldh	K00016	1.1.1.27		LDH, ldh; L-lactate dehydrogenase [EC:1.1.1.27]
lef	K08645	3.4.24.83		lef; anthrax lethal toxin endopeptidase [EC:3.4.24.83]	Metallo peptidases_Family M34: anthrax lethal factor family;M34
lepB	K03100	3.4.21.89		lepB; signal peptidase I [EC:3.4.21.89]	Serine peptidases_Family S26: signal peptidase I family;S26
leuE	K11250		2.A.76.1.5_P76249	leucine efflux protein
levD	K11194	2.7.1.69	4.A.6.1.2_P26379	PTS system, fructose-specific IIA component [EC:2.7.1.69]
levE	K11195	2.7.1.69	4.A.6.1.2_P26380	PTS system, fructose-specific IIB component [EC:2.7.1.69]
levF	K11196		4.A.6.1.2_P26381	PTS system, fructose-specific IIC component
levG	K02771		4.A.6.1.2_P26382	PTS system, fructose-specific IID component
lhpM	K23062		3.A.1.3.21	hydroxyproline transport system permease protein
lhpN	K23063		3.A.1.3.21	hydroxyproline transport system permease protein
lhpO	K23064		3.A.1.3.21	hydroxyproline transport system ATP-binding protein
livF	K01996		3.A.1.4.10_Q8DQH7;3.A.1.4.11_Q6N8W2;3.A.1.4.1_P22731;3.A.1.4.8_P21630	branched-chain amino acid transport system ATP-binding protein
livG	K01995		3.A.1.4.10_Q8DQH7;3.A.1.4.10_Q8DQH8;3.A.1.4.1_P0A9S7;3.A.1.4.3_Q8VM83;3.A.1.4.8_P21629	branched-chain amino acid transport system ATP-binding protein
livH	K01997		3.A.1.4.10_Q8DQI0;3.A.1.4.11_Q6N8W0;3.A.1.4.1_P0AEX7;3.A.1.4.3_Q8VM85;3.A.1.4.8_P21627	branched-chain amino acid transport system permease protein
livK	K01999		3.A.1.4.10_Q8DQI1;3.A.1.4.11_Q6N8W4;3.A.1.4.1_P04816;3.A.1.4.1_P0AD96;3.A.1.4.3_Q9L3M3;3.A.1.4.8_P21175	branched-chain amino acid transport system substrate-binding protein
livM	K01998		3.A.1.4.10_Q8DQH9;3.A.1.4.11_Q6N8W1;3.A.1.4.1_P22729;3.A.1.4.3_Q8VM84;3.A.1.4.8_P21628	branched-chain amino acid transport system permease protein
lldE	K18928			L-lactate dehydrogenase complex protein LldE
lldF	K18929			L-lactate dehydrogenase complex protein LldF
lldG	K00782			L-lactate dehydrogenase complex protein LldG
loiP	K07387	3.4.24.-		metalloprotease [EC:3.4.24.-]	Metallo peptidases_Family M48: Ste24 endopeptidase family;M48
lolC_E	K09808		3.A.1.125.1_P0ADC3;3.A.1.125.1_P75958	lipoprotein-releasing system permease protein
lolD	K09810	3.6.3.-	3.A.1.125.1_P75957	lipoprotein-releasing system ATP-binding protein [EC:3.6.3.-]
lon	K01338	3.4.21.53		ATP-dependent Lon protease [EC:3.4.21.53]	Serine peptidases_Family S16: lon protease family;S16
lonB	K04076	3.4.21.53		ATP-dependent Lon protease [EC:3.4.21.53]	Serine peptidases_Family S16: lon protease family;S16
lonH	K04770	3.4.21.-		Lon-like ATP-dependent protease [EC:3.4.21.-]	Serine peptidases_Family S16: lon protease family;S16
lplA	K17318		3.A.1.1.9;3.A.1.1.291	putative aldouronate transport system substrate-binding protein
lplB	K17319		3.A.1.1.10_Q9KWT8	putative aldouronate transport system permease protein
lplC	K17320		3.A.1.1.10_Q9KWT7	putative aldouronate transport system permease protein
lplT	K08227		2.A.1.42.1_P39196	MFS transporter, LPLT family, lysophospholipid transporter
lpseA	K09691		3.A.1.103.1_Q48476;3.A.1.103.4_Q1D3I3;3.A.1.103.6_Q9I3V8	lipopolysaccharide transport system ATP-binding protein
lpseP	K09690		3.A.1.103.1_Q48475;3.A.1.103.4_Q1D3I2;3.A.1.103.6_Q9HTB8	lipopolysaccharide transport system permease protein
lptA	K09774		1.B.42.1.2_P0ADV1	lipopolysaccharide export system protein LptA
lptB	K06861	7.5.2.5	1.B.42.1.2_P0A9V1;3.A.1.142.1_Q8DNB9;3.A.1.152.1_Q9HVV6	lipopolysaccharide export system ATP-binding protein [EC:7.5.2.5]
lptC	K11719		1.B.42.1.2_P0ADW0	lipopolysaccharide export system protein LptC
lptD	K04744		1.B.42.1.12_L0KAJ8;1.B.42.1.1_Q9K187;1.B.42.1.2_P31554;1.B.42.1.3_Q1D8U8;1.B.42.1.4_Q215S1;1.B.42.1.5_E8QT47;1.B.42.1.6_B4U7L6;1.B.42.1.9_B3DWJ6	LPS-assembly protein
lptE	K03643		1.B.42.1.2_P0ADC1	LPS-assembly lipoprotein
lptF	K07091		1.B.42.1.2_P0AF98;3.A.1.152.1_Q9HXH4;3.A.1.152.3_Q5SL96	lipopolysaccharide export system permease protein
lptG	K11720		1.B.42.1.2_P0ADC6;3.A.1.152.1_Q9HXH5	lipopolysaccharide export system permease protein
lspA	K03101	3.4.23.36		lspA; signal peptidase II [EC:3.4.23.36]	Aspartic peptidases_Family A8: signal peptidase II family;A8
lysE	K06895		2.A.75.1.1_P94633;2.A.75.1.2_P11667;2.A.75.1.3_P64711	L-lysine exporter family protein LysE/ArgO
lysP	K11733		2.A.3.1.18_K7VV21;2.A.3.1.2_P25737	lysine-specific permease
lysX1	K17073		3.A.1.3.20	putative lysine transport system substrate-binding protein
lysX2	K17074		3.A.1.3.20_Q9A1H0	putative lysine transport system permease protein
lysY	K17076	3.6.3.-	3.A.1.3.20_Q9A1H1	putative lysine transport system ATP-binding protein [EC:3.6.3.-]
lytE	K19224	3.4.-.-		lytE, cwlF; peptidoglycan DL-endopeptidase LytE [EC:3.4.-.-]	Cysteine peptidases_Family C40;C40
lytF	K19223	3.4.-.-		lytF, cwlE; peptidoglycan DL-endopeptidase LytF [EC:3.4.-.-]	Cysteine peptidases_Family C40;C40
lytH	K21472	3.4.-.-		lytH; peptidoglycan LD-endopeptidase LytH [EC:3.4.-.-]	Metallo peptidases_Family M23;M23
macA	K13888		3.A.1.122.1_P75830	membrane fusion protein, macrolide-specific efflux system
macB	K05685	3.6.3.-	3.A.1.122.1_P75831;3.A.1.122.12	macrolide transport system ATP-binding/permease protein [EC:3.6.3.-]
maeN	K11616		2.A.24.2.3_O05256	malate:Na+ symporter
malE	K10108		3.A.1.1.1_P0AEX9;3.A.1.1.22_Q9S5Y1;3.A.1.1.22_Q9X0T1	maltose/maltodextrin transport system substrate-binding protein
malEIIB	K20107		4.A.1.1.11;4.A.1.1.12	maltose PTS system EIICB or EIICBA component
malEIIC	K20108		4.A.1.1.11;4.A.1.1.12	maltose PTS system EIICB or EIICBA component
malF	K10109		3.A.1.1.1_P02916;3.A.1.1.22_Q9X0T0	maltose/maltodextrin transport system permease protein
malG	K10110		3.A.1.1.1_P68183;3.A.1.1.22_Q9X0S9;3.A.1.1.22_Q9X2F5	maltose/maltodextrin transport system permease protein
malglcEIIB	K02790	2.7.1.69	4.A.1.1.18_O51590;4.A.1.1.3_P19642	PTS system, maltose and glucose-specific IIB component [EC:2.7.1.69]
malglcEIIC	K02791		4.A.1.1.18_O51590;4.A.1.1.3_P19642	PTS system, maltose and glucose-specific IIC component
malK	K10111	3.6.3.-	3.A.1.1.12_Q9AI63;3.A.1.1.17_Q9R9Q4;3.A.1.1.19_Q8L122;3.A.1.1.1_P68187;3.A.1.1.49_O30494;3.A.1.1.4_Q01937	multiple sugar transport system ATP-binding protein [EC:3.6.3.-]
malQ	K00705	2.4.1.25		4-alpha-glucanotransferase [EC:2.4.1.25]
malY	K16211		2.A.2.6.2_Q9A612;2.A.2.6.3_Q8EEC4	maltose/maltooligosaccharide transporter
manA	K01809	5.3.1.8		mannose-6-phosphate isomerase [EC:5.3.1.8]
manEIIA	K02793	2.7.1.69	4.A.6.1.12_Q1CY66;4.A.6.1.14_Q8DR78;4.A.6.1.16_Q8Y8V8;4.A.6.1.18_B3W757;4.A.6.1.21_Q1K314;4.A.6.1.24_A1RZ67;4.A.6.1.25_CAQ67974.1;4.A.6.1.2_P26379;4.A.6.1.9_Q97N91;4.A.6.2.2_C8X384	PTS system, mannose-specific IIA component [EC:2.7.1.69]
manEIIB	K02794	2.7.1.69	4.A.6.1.10_Q04GK1;4.A.6.1.11_D2BKY7;4.A.6.1.12_Q1CY67;4.A.6.1.13_B3WB09;4.A.6.1.14_Q8DR78;4.A.6.1.15_E1UCI0;4.A.6.1.16_Q8Y8V8;4.A.6.1.16_Q8Y8V9;4.A.6.1.18_B3W754;4.A.6.1.1_P69797;4.A.6.1.20_H1XUM7;4.A.6.1.21_Q1K315;4.A.6.1.23_C1A8G1;4.A.6.1.24_A1RZ66;4.A.6.1.25_CAQ67973.1;4.A.6.1.2_P26379;4.A.6.1.6_Q2QKM4;4.A.6.1.7_Q5M5W6;4.A.6.1.9_Q97N92;4.A.6.2.2_C8X383	PTS system, mannose-specific IIB component [EC:2.7.1.69]
manEIIC	K02795		4.A.6.1.10_Q04GK0;4.A.6.1.11_D2BKY8;4.A.6.1.12_Q1CY68;4.A.6.1.13_B3WB10;4.A.6.1.15_E1UCI1;4.A.6.1.16_Q8Y8W0;4.A.6.1.18_B3W755;4.A.6.1.1_P69801;4.A.6.1.21_Q1K316;4.A.6.1.23_C1A8G2;4.A.6.1.25_CAQ67972.1;4.A.6.1.2_P26381;4.A.6.1.6_Q2QKM3;4.A.6.1.7_Q5M5W7;4.A.6.1.9_Q97N93;4.A.6.2.2_C8X382;4.A.6.4.1_D9QU69	PTS system, mannose-specific IIC component
manEIID	K02796		4.A.6.1.10_Q04GJ9;4.A.6.1.11_D2BKY9;4.A.6.1.12_Q1CY69;4.A.6.1.13_B3WB11;4.A.6.1.15_E1UCI2;4.A.6.1.16_Q8Y8W1;4.A.6.1.18_B3W756;4.A.6.1.1_P69805;4.A.6.1.21_Q1K317;4.A.6.1.23_C1A8G3;4.A.6.1.24_A1RZ69;4.A.6.1.25_CAQ67971.1;4.A.6.1.25_CAQ67972.1;4.A.6.1.6_Q2QKM2;4.A.6.1.7_Q5M5W8;4.A.6.1.9_Q97N94;4.A.6.2.2_C8X4S8	PTS system, mannose-specific IID component
map	K01265	3.4.11.18		map; methionyl aminopeptidase [EC:3.4.11.18]	Metallo peptidases_Family M24;M24
marC	K05595		2.A.95.1.4_Q8J305;2.A.95.1.6_D3P9M4;2.A.95.1.7_P25743	multiple antibiotic resistance protein
mauA	K15228	1.4.9.1		methylamine dehydrogenase light chain [EC:1.4.9.1]
mauB	K15229	1.4.9.1		methylamine dehydrogenase heavy chain [EC:1.4.9.1]
mazE	K07172			antitoxin MazE	1
mazF	K07171	3.1.-.-		mRNA interferase MazF [EC:3.1.-.-]	1
mbhJ	K18023	1.12.7.2		membrane-bound hydrogenase subunit mbhJ [EC:1.12.7.2]
mbhK	K18017	1.12.7.2		membrane-bound hydrogenase subunit beta [EC:1.12.7.2]
mbhL	K18016	1.12.7.2		membrane-bound hydrogenase subunit alpha [EC:1.12.7.2]
mccA				sulfite reductase octaheme cytochrome c SirA
mccB	K17217	4.4.1.1;4.4.1.2		cystathionine gamma-lyase / homocysteine desulfhydrase [EC:4.4.1.1 4.4.1.2]
mcl	K08691	4.1.3.24;4.1.3.25		malyl-CoA/(S)-citramalyl-CoA lyase [EC:4.1.3.24 4.1.3.25]
mcmA1	K01848	5.4.99.2		methylmalonyl-CoA mutase, N-terminal domain [EC:5.4.99.2]
mcmA2	K01849	5.4.99.2		methylmalonyl-CoA mutase, C-terminal domain [EC:5.4.99.2]
mcr	K14468	1.2.1.75;1.1.1.298		malonyl-CoA reductase / 3-hydroxypropionate dehydrogenase (NADP+) [EC:1.2.1.75 1.1.1.298]
mcr2	K00400			methyl coenzyme M reductase system, component A2
mcrA	K00399	2.8.4.1		methyl-coenzyme M reductase alpha subunit [EC:2.8.4.1]
mcrB	K00401	2.8.4.1		methyl-coenzyme M reductase beta subunit [EC:2.8.4.1]
mcrC	K03421			methyl-coenzyme M reductase subunit C
mcrD	K03422			methyl-coenzyme M reductase subunit D
mcrG	K00402	2.8.4.1		methyl-coenzyme M reductase gamma subunit [EC:2.8.4.1]
mct	K14470	5.4.1.3		2-methylfumaryl-CoA isomerase [EC:5.4.1.3]
mdcF	K13936		2.A.69.3.3_O32715	malonate transporter
mddA	K21310	2.1.1.334		methanethiol S-methyltransferase [EC:2.1.1.334]
mdh	K00024	1.1.1.37		malate dehydrogenase [EC:1.1.1.37]
mdh1	K00025	1.1.1.37		MDH1; malate dehydrogenase [EC:1.1.1.37]
mdh2	K00026	1.1.1.37		MDH2; malate dehydrogenase [EC:1.1.1.37]
mdo	K17067	1.2.98.1;1.1.99.37		formaldehyde dismutase / methanol dehydrogenase [EC:1.2.98.1 1.1.99.37]
mdtB	K07788		2.A.6.2	multidrug efflux pump
mdtC	K07789		2.A.6.2	multidrug efflux pump
mdtD	K18326		2.A.1.3.26_P36554	MFS transporter, DHA2 family, multidrug resistance protein
mdtF	K18899		2.A.6.2.13	multidrug efflux pump
mdtO	K15547		2.A.85.6.1	multidrug resistance protein MdtO
mdtP	K15550		1.B.17.3.9	outer membrane protein, multidrug efflux system
medh	K00093	1.1.1.244		methanol dehydrogenase [EC:1.1.1.244]
meh	K09709	4.2.1.153		3-methylfumaryl-CoA hydratase [EC:4.2.1.153]
melB	K11104		2.A.2.1.2_B3W8U5	melibiose permease
mepA	K07261	3.4.24.-		mepA; penicillin-insensitive murein DD-endopeptidase [EC:3.4.24.-]	Metallo peptidases_Family M74;M74
mepH	K19303	3.4.-.-		mepH; murein DD-endopeptidase [EC:3.4.-.-]	Cysteine peptidases_Family C40;C40
mepM	K19304	3.4.24.-		mepM; murein DD-endopeptidase [EC:3.4.24.-]	Metallo peptidases_Family M23;M23
mepS	K13694	3.4.-.- 3.4.17.13		mepS, spr; murein DD-endopeptidase / murein LD-carboxypeptidase [EC:3.4.-.- 3.4.17.13]	Cysteine peptidases_Family C40;C40
mer	K00320	1.5.98.2		5,10-methylenetetrahydromethanopterin reductase [EC:1.5.98.2]
merC	K19058		1.A.72.4	mercuric ion transport protein
merE	K19059		1.A.72.5	mercuric ion transport protein
merP	K08364		1.A.72.1	periplasmic mercuric ion binding protein
merT	K08363		1.A.72.1	mercuric ion transport protein
metA	K00651	2.3.1.46;2.3.1.31		homoserine O-succinyltransferase/O-acetyltransferase [EC:2.3.1.46 2.3.1.31]
metB	K01739	2.5.1.48		cystathionine gamma-synthase [EC:2.5.1.48]
metF	K00297	1.5.1.20		methylenetetrahydrofolate reductase (NADPH) [EC:1.5.1.20]
metI	K02072		3.A.1.24.1_P31547;3.A.1.24.2_O32168;3.A.1.24.3_Q8K8K7;3.A.1.24.4_Q8NSN3;3.A.1.24.5_Q9HT69	D-methionine transport system permease protein
metN	K02071		3.A.1.24.1_P30750;3.A.1.24.2_O32169;3.A.1.24.3_Q8K8K8;3.A.1.24.4_Q8NSN2;3.A.1.24.5_Q9HT70	D-methionine transport system ATP-binding protein
metQ	K02073		3.A.1.24.1_P28635;3.A.1.24.2_O32167;3.A.1.24.3_Q8K8K9;3.A.1.24.4_Q8NSN1;3.A.1.24.5_Q9HT68	D-methionine transport system substrate-binding protein
metX	K00641	2.3.1.31;2.3.1.46		homoserine O-acetyltransferase/O-succinyltransferase [EC:2.3.1.31 2.3.1.46]
metZ	K10764	2.5.1.-		O-succinylhomoserine sulfhydrylase [EC:2.5.1.-]
mexA	K03585		2.A.6.2.5_P43505;2.A.6.2.6_P52477;2.A.6.2.9_Q9WWZ9;2.A.6.2.23_Q6VV69	membrane fusion protein, multidrug efflux system
mexB	K18138		2.A.6.2.2_P31224;2.A.6.2.5_Q51073;2.A.6.2.6_P52002;2.A.6.2.6_P52477;2.A.6.2.9_O52248;2.A.6.2.23_Q6VV68	multidrug efflux pump
mexD	K18296		2.A.6.2.15	multidrug efflux pump
mexF	K18299		2.A.6.2.16	multidrug efflux pump
mexI	K18307		2.A.6.2.32	multidrug efflux pump
mexK	K18303		2.A.6.2.17	multidrug efflux pump
mexN	K21133		2.A.6.2.35	multidrug efflux pump
mexY	K18095		2.A.6.2.21;2.A.6.2.24	multidrug efflux pump
mfch	K14449	4.2.1.148		2-methylfumaryl-CoA hydratase [EC:4.2.1.148]
mfnA	K18933	4.1.1.25;4.1.1.11		tyrosine decarboxylase / aspartate 1-decarboxylase [EC:4.1.1.25 4.1.1.11]
mfnB	K09733	4.2.3.153		(5-formylfuran-3-yl)methyl phosphate synthase [EC:4.2.3.153]
mfnC	K19793	2.6.1.108		(5-formylfuran-3-yl)methyl phosphate transaminase [EC:2.6.1.108]
mfnD	K06914	6.3.4.24		tyramine---L-glutamate ligase [EC:6.3.4.24]
mfnE	K07144	2.7.4.31		5-(aminomethyl)-3-furanmethanol phosphate kinase [EC:2.7.4.31]
mfnF	K07072	2.5.1.131		(4-(4-[2-(gamma-L-glutamylamino)ethyl]phenoxymethyl)furan-2-yl)methanamine synthase [EC:2.5.1.131]
mfs.cp	K03449		2.A.1.17.2_Q04FN1	MFS transporter, CP family, cyanate transporter
mfs.set	K03291		2.A.1.20.1_P31675;2.A.1.20.2_P33026;2.A.1.20.3_P31436;2.A.1.20.4_Q9S3K0	MFS transporter, SET family, sugar efflux transporter
mgdA	K22084	1.5.99.5		methylglutamate dehydrogenase subunit A [EC:1.5.99.5]
mgdB	K22085	1.5.99.5		methylglutamate dehydrogenase subunit B [EC:1.5.99.5]
mgdC	K22086	1.5.99.5		methylglutamate dehydrogenase subunit C [EC:1.5.99.5]
mgdD	K22087	1.5.99.5		methylglutamate dehydrogenase subunit D [EC:1.5.99.5]
mglA	K10542	3.6.3.17	3.A.1.2.3_P0AAG8	methyl-galactoside transport system ATP-binding protein [EC:3.6.3.17]
mglB	K10540		3.A.1.2.3_P0AEE5	methyl-galactoside transport system substrate-binding protein
mglC	K10541		3.A.1.2.3_P23200	methyl-galactoside transport system permease protein
mgsA	K22081	2.1.1.21		methylamine---glutamate N-methyltransferase subunit A [EC:2.1.1.21]
mgsB	K22082	2.1.1.21		methylamine---glutamate N-methyltransferase subunit B [EC:2.1.1.21]
mgsC	K22083	2.1.1.21		methylamine---glutamate N-methyltransferase subunit C [EC:2.1.1.21]
mgtE	K06213		1.A.26.1;1.A.26.2;1.A.26.3	magnesium transporter
mhpT	K05819		2.A.1.15.2_P77589	MFS transporter, AAHS family, 3-hydroxyphenylpropionic acid transporter
mlaA	K04754		3.A.1.27.3_P76506	phospholipid-binding lipoprotein MlaA
mlaB	K07122		3.A.1.27.3_P64602	phospholipid transport system transporter-binding protein
mlaC	K07323		3.A.1.27.3_P0ADV7	phospholipid transport system substrate-binding protein
mlaD	K02067		3.A.1.27.3_P64604	phospholipid/cholesterol/gamma-HCH transport system substrate-binding protein
mlaE	K02066		3.A.1.27.3_P64606	phospholipid/cholesterol/gamma-HCH transport system permease protein
mlaF	K02065		3.A.1.27.3_P63386	phospholipid/cholesterol/gamma-HCH transport system ATP-binding protein
mleP	K07088		2.A.69.3.2_E0SFK1;2.A.69.3.4_P56949;2.A.69.3.6_Q98L58;2.A.69.4.5_Q48797;2.A.69.3.1_Q9AK33;2.A.69.4.4_Q1DE54	uncharacterized protein
mmoB	K16160			methane monooxygenase regulatory protein B
mmoC	K16161	1.14.13.25		methane monooxygenase component C [EC:1.14.13.25]
mmoD	K16162			methane monooxygenase component D
mmoX	K16157	1.14.13.25		methane monooxygenase component A alpha chain [EC:1.14.13.25]
mmoY	K16158	1.14.13.25		methane monooxygenase component A beta chain [EC:1.14.13.25]
mmoZ	K16159	1.14.13.25		methane monooxygenase component A gamma chain [EC:1.14.13.25]
mmpL10	K06994		2.A.6.5.13_P9WJU1;2.A.6.5.3_Q9KH53;2.A.6.5.7_O53735	putative drug exporter of the RND superfamily
mmpL11	K20466		2.A.6.5.5	heme transporter
mmr	K03297		2.A.7.1	small multidrug resistance pump
mmtsA	K16954	2.1.1.251		methylthiol:coenzyme M methyltransferase [EC:2.1.1.251]
mmtsB	K16955			methylated-thiol--corrinoid protein
mmuP	K16235		2.A.3.1.11_P39137	S-methylmethionine transporter
mnA	K09820		3.A.1.15	manganese/iron transport system ATP-binding protein
mngEIIA	K11198	2.7.1.69	4.A.2.1.3	PTS system, 2-O-A-mannosyl-D-glycerate-specific IIA component [EC:2.7.1.69]
mngEIIB	K11199	2.7.1.69	4.A.2.1.3	PTS system, 2-O-A-mannosyl-D-glycerate-specific IIB component [EC:2.7.1.69]
mngEIIC	K11200		4.A.2.1.3	PTS system, 2-O-A-mannosyl-D-glycerate-specific IIC component
mnhA	K05565		2.A.63.1;2.A.63.2	multicomponent Na+:H+ antiporter subunit A
mnhB	K05566		2.A.63.1;2.A.63.2	multicomponent Na+:H+ antiporter subunit B
mnhC	K05567		2.A.63.1;2.A.63.2	multicomponent Na+:H+ antiporter subunit C
mnhD	K05568		2.A.63.1;2.A.63.2	multicomponent Na+:H+ antiporter subunit D
mnhE	K05569		2.A.63.1;2.A.63.2	multicomponent Na+:H+ antiporter subunit E
mnhF	K05570		2.A.63.1;2.A.63.2	multicomponent Na+:H+ antiporter subunit F
mnhG	K05571		2.A.63.1;2.A.63.2	multicomponent Na+:H+ antiporter subunit G
mnP	K09819		3.A.1.15	manganese/iron transport system permease protein
mnS	K09818		3.A.1.15	manganese/iron transport system substrate-binding protein
mntA1	K11603		3.A.1.15.1	manganese transport system ATP-binding protein
mntA2	K19973		3.A.1.15.15	manganese transport system ATP-binding protein
mntB1	K11602		3.A.1.15.1	manganese transport system permease protein
mntB2	K19976		3.A.1.15.15	manganese transport system permease protein
mntC1	K11601		3.A.1.15.1	manganese transport system substrate-binding protein
mntC2	K19975		3.A.1.15.15	manganese transport system substrate-binding protein
mntH	K03322		2.A.55.2.6;2.A.55.3	manganese transport protein
mntP	K23242		2.A.107	manganese efflux pump family protein
modA	K02020		3.A.1.8	molybdate transport system substrate-binding protein
modB	K02018		3.A.1.8	molybdate transport system permease protein
modC	K02017	3.6.3.29	3.A.1.8	molybdate transport system ATP-binding protein [EC:3.6.3.29]
modF	K05776			molybdate transport system ATP-binding protein
motA	K02556		1.A.30.1	chemotaxis protein MotA
motB	K02557		1.A.30.1	chemotaxis protein MotB
mox	K17066	1.1.3.13		alcohol oxidase [EC:1.1.3.13]
mpl	K19351	3.4.24.-		mpl; zinc metalloproteinase [EC:3.4.24.-]	Metallo peptidases_Family M4: thermolysin family;M4
mqo	K00116	1.1.5.4		mqo; malate dehydrogenase (quinone) [EC:1.1.5.4]
msbA	K11085	3.6.3.-	3.A.1.106.1_P60752	ATP-binding cassette, subfamily B, bacterial MsbA [EC:3.6.3.-]
mscL	K03282		1.A.22.1.1_P0A742;1.A.22.1.3_P94585	large conductance mechanosensitive channel
mscS	K03442		1.A.23.2	small conductance mechanosensitive channel
msmA	K16968	1.14.13.111		methanesulfonate monooxygenase subunit alpha [EC:1.14.13.111]
msmB	K16969	1.14.13.111		methanesulfonate monooxygenase subunit beta [EC:1.14.13.111]
msmE1	K10120		3.A.1.1.20	fructooligosaccharide transport system substrate-binding protein
msmE2	K10117		3.A.1.1.28_Q00749;3.A.1.1.42_Q9FBS5;3.A.1.1.43_Q9FBS5;3.A.1.1.45_Q8NMV3;3.A.1.1.47_A5LBQ6	raffinose/stachyose/melibiose transport system substrate-binding protein
msmF1	K10121		3.A.1.1.20	fructooligosaccharide transport system permease protein
msmF2	K10118		3.A.1.1.28_Q00750;3.A.1.1.42_Q9FBS6;3.A.1.1.43_Q9FBS6;3.A.1.1.45_Q8NMV4;3.A.1.1.47_A5LBQ5	raffinose/stachyose/melibiose transport system permease protein
msmG1	K10122		3.A.1.1.20	fructooligosaccharide transport system permease protein
msmG2	K10119		3.A.1.1.28_Q00751;3.A.1.1.42_Q9FBS7;3.A.1.1.43_Q9FBS7;3.A.1.1.45_Q8NMV5;3.A.1.1.47_A5LBQ4	raffinose/stachyose/melibiose transport system permease protein
msmX	K10112		3.A.1.1.14_Q97UF2;3.A.1.1.16_Q8TZQ3;3.A.1.1.22_Q9X103;3.A.1.1.23_P96483;3.A.1.1.24_Q72L52;3.A.1.1.25_Q72L52;3.A.1.1.26_P94360;3.A.1.1.27_Q8DT25;3.A.1.1.28_Q00752;3.A.1.1.30_Q88P35;3.A.1.1.31_O50454;3.A.1.1.32_Q55035;3.A.1.1.33_Q9L0Q1;3.A.1.1.34_O32151;3.A.1.1.34_P94360;3.A.1.1.45_Q8NMV1;3.A.1.1.46_P77481	multiple sugar transport system ATP-binding protein
msr	K18602	1.1.1.-		malonic semialdehyde reductase [EC:1.1.1.-]
mtaA	K14080	2.1.1.246		[methyl-Co(III) methanol-specific corrinoid protein]:coenzyme M methyltransferase [EC:2.1.1.246]
mtaB	K04480	2.1.1.90		methanol---5-hydroxybenzimidazolylcobamide Co-methyltransferase [EC:2.1.1.90]
mtaC	K14081			methanol corrinoid protein
mtbA	K14082	2.1.1.247		[methyl-Co(III) methylamine-specific corrinoid protein]:coenzyme M methyltransferase [EC:2.1.1.247]
mtbB	K16178	2.1.1.249		dimethylamine---corrinoid protein Co-methyltransferase [EC:2.1.1.249]
mtbC	K16179			dimethylamine corrinoid protein
mtd	K00319	1.5.98.1		methylenetetrahydromethanopterin dehydrogenase [EC:1.5.98.1]
mtdA	K00300	1.5.1.5;1.5.1.-		methylenetetrahydrofolate/methylenetetrahydromethanopterin dehydrogenase (NADP+) [EC:1.5.1.5 1.5.1.-]
mtdB	K10714	1.5.1.-		methylene-tetrahydromethanopterin dehydrogenase [EC:1.5.1.-]
mtdch	K01499	3.5.4.27		methenyltetrahydromethanopterin cyclohydrolase [EC:3.5.4.27]
mtfA	K09933			mtfA; MtfA peptidase	Metallo peptidases_Family M90;M90
mthK	K10716		1.A.1.1;1.A.1.6;1.A.1.13;1.A.1.17;1.A.1.24;1.A.1.25	voltage-gated potassium channel
mtkA	K14067	6.2.1.9		malate-CoA ligase subunit beta [EC:6.2.1.9]
mtkB	K08692	6.2.1.9		malate-CoA ligase subunit alpha [EC:6.2.1.9]
mtlE	K10227		3.A.1.1.49_O30491	sorbitol/mannitol transport system substrate-binding protein
mtlEIIA	K02798	2.7.1.69	4.A.2.1.24_P69824;4.A.2.1.5_C0H3V2	PTS system, mannitol-specific IIA component [EC:2.7.1.69]
mtlEIIB	K02799	2.7.1.69	4.A.2.1.2;4.A.2.1.5;4.A.2.1.12;4.A.2.1.24	PTS system, mannitol-specific IIB component [EC:2.7.1.69]
mtlEIIC	K02800		4.A.2.1.12_Q9KKQ7;4.A.2.1.24_P69826;4.A.2.1.2_P00550;4.A.2.1.5_P42956	PTS system, mannitol-specific IIC component
mtlF	K10228		3.A.1.1.49_O30492	sorbitol/mannitol transport system permease protein
mtlG	K10229		3.A.1.1.49_O30493	sorbitol/mannitol transport system permease protein
mtmB	K16176	2.1.1.248		methylamine---corrinoid protein Co-methyltransferase [EC:2.1.1.248]
mtmC	K16177			monomethylamine corrinoid protein
mtr	K03835		2.A.42.1.2_P0AAD2;2.A.42.1.5_Q5NFU3	tryptophan-specific transport protein
mtrA				extracelllular iron oxide respiratory system periplasmic decaheme cytochrome c component MtrA
mtrA_tc	K07670			two-component system, OmpR family, response regulator MtrA
mtrB				extracellular iron oxide respiratory system outer membrane component
mtrB_tc	K07654	2.7.13.3		two-component system, OmpR family, sensor histidine kinase MtrB [EC:2.7.13.3]
mtrC				extracellular iron oxide respiratory system surface decaheme cytochrome c component MtrC
mtrD				extracellular respiratory system periplasmic decaheme cytochrome c component MtrD
mtrE				extracellular respiratory sytem outer membrane component MtrE
mtrF				extracellular respiratory system surface decaheme cytochrome c component MtrF
mtsA	K11704		3.A.1.15.6	iron/zinc/copper transport system substrate-binding protein
mtsB	K11706		3.A.1.15.6	iron/zinc/copper transport system ATP-binding protein
mtsC	K11705		3.A.1.15.6	iron/zinc/copper transport system permease protein
mttB	K14083	2.1.1.250		trimethylamine---corrinoid protein Co-methyltransferase [EC:2.1.1.250]
mttC	K14084			trimethylamine corrinoid protein
murEIIB	K11191	2.7.1.69	4.A.1.2.7_P77272	PTS system, N-acetylmuramic acid-specific IIB component [EC:2.7.1.69]
murEIIC	K11192		4.A.1.2.7_P77272	PTS system, N-acetylmuramic acid-specific IIC component
mut	K01847	5.4.99.2		methylmalonyl-CoA mutase [EC:5.4.99.2]
mvhA	K14126	1.12.99.-;1.8.98.5		F420-non-reducing hydrogenase large subunit [EC:1.12.99.- 1.8.98.5]
mvhD	K14127	1.12.99.-;1.8.98.5;1.8.98.6		F420-non-reducing hydrogenase iron-sulfur subunit [EC:1.12.99.- 1.8.98.5 1.8.98.6]
mvhG	K14128	1.12.99.-;1.8.98.5		F420-non-reducing hydrogenase small subunit [EC:1.12.99.- 1.8.98.5]
mxaA	K16256			mxaA protein
mxaC	K16257			mxaC protein
mxaD	K16260			mxaD protein
mxaF	K14028	1.1.2.7		methanol dehydrogenase (cytochrome c) subunit 1 [EC:1.1.2.7]
mxaG	K16255			cytochrome c-L
mxaI	K14029	1.1.2.7		methanol dehydrogenase (cytochrome c) subunit 2 [EC:1.1.2.7]
mxaJ	K16254			mxaJ protein
mxaK	K16258			mxaK protein
mxaL	K16259			mxaL protein
mxaR	K03924	3.6.3.-		MoxR-like ATPase [EC:3.6.3.-]
nagEIIA	K02802	2.7.1.69	4.A.1.1.2	PTS system, N-acetylglucosamine-specific IIA component [EC:2.7.1.69]
nagEIIB	K02803	2.7.1.69	4.A.1.1.5_Q8GBT8	PTS system, N-acetylglucosamine-specific IIB component [EC:2.7.1.69]
nagEIIC	K02804		4.A.1.1.15_Q9HXN4;4.A.1.1.2_P09323;4.A.1.1.5_Q8GBT6;4.A.1.1.5_Q8GBT7;4.A.1.1.6_P39816;4.A.1.1.7_O34521	PTS system, N-acetylglucosamine-specific IIC component
napA	K02567	1.7.99.-		periplasmic nitrate reductase NapA [EC:1.7.99.-]
napB	K02568			cytochrome c-type protein NapB
narB	K00367	1.7.7.2		ferredoxin-nitrate reductase [EC:1.7.7.2]
narG	K00370	1.7.5.1;1.7.99.-		nitrate reductase / nitrite oxidoreductase, alpha subunit [EC:1.7.5.1 1.7.99.-]
narH	K00371	1.7.5.1;1.7.99.-		nitrate reductase / nitrite oxidoreductase, beta subunit [EC:1.7.5.1 1.7.99.-]
narI_dsrM	K00374	1.7.5.1;1.7.99.-		nitrate reductase gamma subunit [EC:1.7.5.1 1.7.99.-]
narJ	K00373			nitrate reductase molybdenum cofactor assembly chaperone NarJ/NarW
nasA	K00372	1.7.99.-		assimilatory nitrate reductase catalytic subunit [EC:1.7.99.-]
nasB	K00360	1.7.99.-		assimilatory nitrate reductase electron transfer subunit [EC:1.7.99.-]
natA	K09697		3.A.1.115	sodium transport system ATP-binding protein
natA1	K11957		3.A.1.4.2_Q55164	neutral amino acid transport system ATP-binding protein
natB	K09696		3.A.1.115	sodium transport system permease protein
natB1	K11954		3.A.1.4.2_Q55387	neutral amino acid transport system substrate-binding protein
natC	K11955		3.A.1.4.2_P74455	neutral amino acid transport system permease protein
natD1	K11956		3.A.1.4.2_P74318	neutral amino acid transport system permease protein
natE	K11958		3.A.1.4.2_P73650	neutral amino acid transport system ATP-binding protein
ndhA	K05572	7.1.1.2		NAD(P)H-quinone oxidoreductase subunit 1 [EC:7.1.1.2]
ndhB	K05573	7.1.1.2		NAD(P)H-quinone oxidoreductase subunit 2 [EC:7.1.1.2]
ndhC	K05574	7.1.1.2		NAD(P)H-quinone oxidoreductase subunit 3 [EC:7.1.1.2]
ndhD	K05575	7.1.1.2		NAD(P)H-quinone oxidoreductase subunit 4 [EC:7.1.1.2]
ndhE	K05576	7.1.1.2		NAD(P)H-quinone oxidoreductase subunit 4L [EC:7.1.1.2]
ndhF	K05577	7.1.1.2		NAD(P)H-quinone oxidoreductase subunit 5 [EC:7.1.1.2]
ndhG	K05578	7.1.1.2		NAD(P)H-quinone oxidoreductase subunit 6 [EC:7.1.1.2]
ndhH	K05579	7.1.1.2		NAD(P)H-quinone oxidoreductase subunit H [EC:7.1.1.2]
ndhI	K05580	7.1.1.2		NAD(P)H-quinone oxidoreductase subunit I [EC:7.1.1.2]
ndhJ	K05581	7.1.1.2		NAD(P)H-quinone oxidoreductase subunit J [EC:7.1.1.2]
ndhK	K05582	7.1.1.2		NAD(P)H-quinone oxidoreductase subunit K [EC:7.1.1.2]
ndhL	K05583	7.1.1.2		NAD(P)H-quinone oxidoreductase subunit L [EC:7.1.1.2]
ndhM	K05584	7.1.1.2		NAD(P)H-quinone oxidoreductase subunit M [EC:7.1.1.2]
ndhN	K05585	7.1.1.2		NAD(P)H-quinone oxidoreductase subunit N [EC:7.1.1.2]
nepI	K03445		2.A.1.2.26_P0ADL1	MFS transporter, DHA1 family, purine ribonucleoside efflux pump
ngcE	K10200		3.A.1.1.18_Q8RJV0	N-acetylglucosamine transport system substrate-binding protein
ngcF	K10201		3.A.1.1.18_Q8RJU9	N-acetylglucosamine transport system permease protein
ngcG	K10202		3.A.1.1.18_Q8RJU8	N-acetylglucosamine transport system permease protein
nhaA	K03313		2.A.33.1	Na+:H+ antiporter, NhaA family
nhaB	K03314		2.A.34.1	Na+:H+ antiporter, NhaB family
nhaC	K03315		2.A.35.1.2_P54571;2.A.35.1.3_Q838N7;2.A.35.1.4_B0R9X2	Na+:H+ antiporter, NhaC family
niaX	K16788		2.A.88.5.1_Q99Z31;2.A.88.5.2_A2RKV5	niacin transporter
nifD	K02586	1.18.6.1		nitrogenase molybdenum-iron protein alpha chain [EC:1.18.6.1]
nifH	K02588			nitrogenase iron protein NifH
nifK	K02591	1.18.6.1		nitrogenase molybdenum-iron protein beta chain [EC:1.18.6.1]
nifW	K02595			nitrogenase-stabilizing/protective protein
nifX	K02596			nitrogen fixation protein NifX
nifZ	K02597			nitrogen fixation protein NifZ
nikA	K15584		3.A.1.5.3;3.A.1.5.33;3.A.1.5.40;3.A.1.5.43	nickel transport system substrate-binding protein
nikB	K15585		3.A.1.5.3;3.A.1.5.33;3.A.1.5.40;3.A.1.5.43	nickel transport system permease protein
nikC	K15586		3.A.1.5.3;3.A.1.5.33;3.A.1.5.40;3.A.1.5.43	nickel transport system permease protein
nikD	K15587	3.6.3.24	3.A.1.5.3;3.A.1.5.33;3.A.1.5.40;3.A.1.5.43	nickel transport system ATP-binding protein [EC:3.6.3.24]
nikE	K10824	3.6.3.24	3.A.1.5.3;3.A.1.5.33;3.A.1.5.40;3.A.1.5.43	nickel transport system ATP-binding protein [EC:3.6.3.24]
nirA	K00366	1.7.7.1		ferredoxin-nitrite reductase [EC:1.7.7.1]
nirB	K00362	1.7.1.15		nitrite reductase (NADH) large subunit [EC:1.7.1.15]
nirC	K02598		1.A.16.3	nitrite transporter NirC
nirD	K00363	1.7.1.15		nitrite reductase (NADH) small subunit [EC:1.7.1.15]
nirK	K00368	1.7.2.1		nitrite reductase (NO-forming) [EC:1.7.2.1]
nirS	K15864	1.7.2.1;1.7.99.1		nitrite reductase (NO-forming) / hydroxylamine reductase [EC:1.7.2.1 1.7.99.1]
nisA	K20482		1.C.20	lantibiotic bacteriocin
nisE	K20491		3.A.1.124.1;3.A.1.124.2;3.A.1.124.6	lantibiotic transport system permease protein
nisF	K20490		3.A.1.124.1;3.A.1.124.2;3.A.1.124.6	lantibiotic transport system ATP-binding protein
nisG	K20492		3.A.1.124.1;3.A.1.124.2;3.A.1.124.6	lantibiotic transport system permease protein
nisP	K20486	3.4.21.-		nisP, epiP; lantibiotic leader peptide-processing serine protease [EC:3.4.21.-]	Serine peptidases_Family S8: subtilisin family;S8
nixA	K07241		2.A.52.1	high-affinity nickel-transport protein
nodI	K09695		3.A.1.102.1_P50332	lipooligosaccharide transport system ATP-binding protein
nodJ	K09694		3.A.1.102.1_P50333	lipooligosaccharide transport system permease protein
norB	K04561	1.7.2.5		nitric oxide reductase subunit B [EC:1.7.2.5]
norC	K02305			nitric oxide reductase subunit C
norV	K12264			anaerobic nitric oxide reductase flavorubredoxin
norW	K12265	1.18.1.-		nitric oxide reductase FlRd-NAD(+) reductase [EC:1.18.1.-]
nosF	K19340		3.A.1.132.2	Cu-processing system ATP-binding protein
nosY	K19341		3.A.1.132.2	Cu-processing system permease protein
nosZ	K00376	1.7.2.4		nitrous-oxide reductase [EC:1.7.2.4]
nprB	K08777	3.4.24.-		nprB; neutral peptidase B [EC:3.4.24.-]	Metallo peptidases_Family M4: thermolysin family;M4
nqrA	K00346	7.2.1.1		Na+-transporting NADH:ubiquinone oxidoreductase subunit A [EC:7.2.1.1]
nqrB	K00347	7.2.1.1		Na+-transporting NADH:ubiquinone oxidoreductase subunit B [EC:7.2.1.1]
nqrC	K00348	7.2.1.1		Na+-transporting NADH:ubiquinone oxidoreductase subunit C [EC:7.2.1.1]
nqrD	K00349	7.2.1.1		Na+-transporting NADH:ubiquinone oxidoreductase subunit D [EC:7.2.1.1]
nqrE	K00350	7.2.1.1		Na+-transporting NADH:ubiquinone oxidoreductase subunit E [EC:7.2.1.1]
nqrF	K00351	7.2.1.1		Na+-transporting NADH:ubiquinone oxidoreductase subunit F [EC:7.2.1.1]
nreB	K07683	2.7.13.3		two-component system, NarL family, sensor histidine kinase NreB [EC:2.7.13.3]
nreC	K07696			two-component system, NarL family, response regulator NreC
nrfA	K03385	1.7.2.2		nitrite reductase (cytochrome c-552) [EC:1.7.2.2]
nrfH	K15876			cytochrome c nitrite reductase small subunit
nrnA	K06881	3.1.3.7;3.1.13.3		bifunctional oligoribonuclease and PAP phosphatase NrnA [EC:3.1.3.7 3.1.13.3]
nrsA	K11326		2.A.6.1	cation efflux system protein involved in nickel and cobalt tolerance
nrsR	K11330			two-component system, OmpR family, Ni(II)-responsive and/or redox-responsive regulator NrsR
nrsS	K11328	2.7.13.3		two-component system, OmpR family, Ni(II)-sensor and/or redox sensor kinase NrsS [EC:2.7.13.3]
nrtA	K15576		3.A.1.16.1;3.A.1.16.2	nitrate/nitrite transport system substrate-binding protein
nrtB	K15577		3.A.1.16.1;3.A.1.16.2	nitrate/nitrite transport system permease protein
nrtC	K15578	3.6.3.-	3.A.1.16.1	nitrate/nitrite transport system ATP-binding protein [EC:3.6.3.-]
nrtD	K15579		3.A.1.16.1;3.A.1.16.2	nitrate/nitrite transport system ATP-binding protein
nsrR	K13771			Rrf2 family transcriptional regulator, nitric oxide-sensitive transcriptional repressor
ntrEIIA	K02806	2.7.1.69		PTS system, nitrogen regulatory IIA component [EC:2.7.1.69]
nukE	K20460		3.A.1.124.3;3.A.1.124.4;3.A.1.124.5	lantibiotic transport system permease protein
nukF	K20459		3.A.1.124.3;3.A.1.124.4;3.A.1.124.5	lantibiotic transport system ATP-binding protein
nukG	K20461		3.A.1.124.3;3.A.1.124.4;3.A.1.124.5	lantibiotic transport system permease protein
nuoA	K00330	7.1.1.2		NADH-quinone oxidoreductase subunit A [EC:7.1.1.2]
nuoB	K00331	7.1.1.2		NADH-quinone oxidoreductase subunit B [EC:7.1.1.2]
nuoBCD	K13380	7.1.1.2		NADH-quinone oxidoreductase subunit B/C/D [EC:7.1.1.2]
nuoC	K00332	7.1.1.2		NADH-quinone oxidoreductase subunit C [EC:7.1.1.2]
nuoCD	K13378	7.1.1.2		NADH-quinone oxidoreductase subunit C/D [EC:7.1.1.2]
nuoD	K00333	7.1.1.2		NADH-quinone oxidoreductase subunit D [EC:7.1.1.2]
nuoE	K00334	7.1.1.2		NADH-quinone oxidoreductase subunit E [EC:7.1.1.2]
nuoF	K00335	7.1.1.2		NADH-quinone oxidoreductase subunit F [EC:7.1.1.2]
nuoG	K00336	7.1.1.2		NADH-quinone oxidoreductase subunit G [EC:7.1.1.2]
nuoH	K00337	7.1.1.2		NADH-quinone oxidoreductase subunit H [EC:7.1.1.2]
nuoI	K00338	7.1.1.2		NADH-quinone oxidoreductase subunit I [EC:7.1.1.2]
nuoJ	K00339	7.1.1.2		NADH-quinone oxidoreductase subunit J [EC:7.1.1.2]
nuoK	K00340	7.1.1.2		NADH-quinone oxidoreductase subunit K [EC:7.1.1.2]
nuoL	K00341	7.1.1.2		NADH-quinone oxidoreductase subunit L [EC:7.1.1.2]
nuoLM	K15863	7.1.1.2		NADH-quinone oxidoreductase subunit L/M [EC:7.1.1.2]
nuoM	K00342	7.1.1.2		NADH-quinone oxidoreductase subunit M [EC:7.1.1.2]
nuoN	K00343	7.1.1.2		NADH-quinone oxidoreductase subunit N [EC:7.1.1.2]
nupC	K11535		2.A.41.1.1_P0AFF2;2.A.41.1.2_P39141	nucleoside transport protein
nupG	K03289		2.A.1.10.1_P0AFF4	MFS transporter, NHS family, nucleoside permease
nupX	K16325		2.A.41.2.10_P33021	nucleoside permease
oadA	K01571	7.2.4.2		oxaloacetate decarboxylase (Na+ extruding) subunit alpha [EC:7.2.4.2]
oadG	K01573			oxaloacetate decarboxylase (Na+ extruding) subunit gamma
occM	K10019		3.A.1.3.23_Q9HU29	octopine/nopaline transport system permease protein
occP	K10021	3.6.3.-	3.A.1.3.23_Q9HU32	octopine/nopaline transport system ATP-binding protein [EC:3.6.3.-]
occQ	K10020		3.A.1.3.5;3.A.1.3.6	octopine/nopaline transport system permease protein
occT	K10018		3.A.1.3.5;3.A.1.3.6	octopine/nopaline transport system substrate-binding protein
ocd	K01750	4.3.1.12		ornithine cyclodeaminase [EC:4.3.1.12]	1
oforA	K00174	1.2.7.3;1.2.7.11		2-oxoglutarate/2-oxoacid ferredoxin oxidoreductase subunit alpha [EC:1.2.7.3 1.2.7.11]
oforB	K00175	1.2.7.3;1.2.7.11		2-oxoglutarate/2-oxoacid ferredoxin oxidoreductase subunit beta [EC:1.2.7.3 1.2.7.11]
oforC	K00177	1.2.7.3		korC, oorC; 2-oxoglutarate ferredoxin oxidoreductase subunit gamma [EC:1.2.7.3]
oforD	K00176	1.2.7.3		korD, oorD; 2-oxoglutarate ferredoxin oxidoreductase subunit delta [EC:1.2.7.3]
ogdh	K00164	1.2.4.2		OGDH, sucA; 2-oxoglutarate dehydrogenase E1 component [EC:1.2.4.2]
ohrR	K23775			MarR family transcriptional regulator, organic hydroperoxide resistance regulator	1
oleC4	K18232		3.A.1.105.2	oleandomycin transport system ATP-binding protein
oleC5	K18233		3.A.1.105.2	oleandomycin transport system permease protein
omcA				extracelllular iron oxide respiratory system surface decaheme cytochrome c component OmcA
ompA	K03162		1.B.2.1.1_P10332	major outer membrane protein
ompR	K07659			two-component system, OmpR family, phosphate regulon response regulator OmpR
oorA	K19070	1.2.7.10		oxalate oxidoreductase subunit alpha [EC:1.2.7.10]
oorB	K19071	1.2.7.10		oxalate oxidoreductase subunit beta [EC:1.2.7.10]
oorD	K19072	1.2.7.10		oxalate oxidoreductase subunit delta [EC:1.2.7.10]
opmD	K18308		1.B.17;2.A.6.2.32	outer membrane protein, multidrug efflux system
opmE	K19593		1.B.17;2.A.6.2.34	outer membrane protein, multidrug efflux system
oppA1	K15580		3.A.1.5.18_O31315;3.A.1.5.18_O50927;3.A.1.5.18_O51307;3.A.1.5.18_O51308;3.A.1.5.18_O54584;3.A.1.5.19_Q2FZR3;3.A.1.5.1_P06202;3.A.1.5.1_P77348;3.A.1.5.25_Q64K09;3.A.1.5.25_Q9CIL2;3.A.1.5.37_B1W1M2;3.A.1.5.41_P23843;3.A.1.5.41_P77348;3.A.1.5.41_Q46863	oligopeptide transport system substrate-binding protein
oppB1	K15581		3.A.1.5.18_O31307;3.A.1.5.19_Q2FZR7;3.A.1.5.1_P08005;3.A.1.5.25_Q9CIL1;3.A.1.5.37_B1W1M1;3.A.1.5.41_P0AFH2	oligopeptide transport system permease protein
oppC1	K15582		3.A.1.5.18_O51310;3.A.1.5.19_Q2FZR6;3.A.1.5.1_P08006;3.A.1.5.25_Q9CIL0;3.A.1.5.37_B1W1M0;3.A.1.5.41_P0AFH6	oligopeptide transport system permease protein
oppD1	K15583		3.A.1.5.18_O31309;3.A.1.5.19_Q2FZR5;3.A.1.5.1_P04285;3.A.1.5.20_P42064;3.A.1.5.25_Q9CIK9;3.A.1.5.37_B1W1L9;3.A.1.5.41_P76027	oligopeptide transport system ATP-binding protein
oppF1	K10823		3.A.1.5.18_O31310;3.A.1.5.19_Q2FZR4;3.A.1.5.1_P08007;3.A.1.5.20_P42065;3.A.1.5.25_Q9CIK8;3.A.1.5.37_B1W1L8;3.A.1.5.41_P77737	oligopeptide transport system ATP-binding protein
oprB	K07267		1.B.19.1.1_Q51485;1.B.19.1.2_A4LTL1	porin
oprC	K18903		1.B.17.3.3	outer membrane protein, multidrug efflux system
oprD	K18093	3.4.21.-	1.B.25.1.11_Q9I0E2;1.B.25.1.12_Q9I6X0;1.B.25.1.1_P32722;1.B.25.1.32_B7V849;1.B.25.1.7_Q9I202;1.B.25.1.8_Q9HUR5	imipenem/basic amino acid-specific outer membrane pore [EC:3.4.21.-]
oprN	K18300		1.B.17	outer membrane protein, multidrug efflux system
oprO_P	K07221	1.B.5.1		phosphate-selective porin OprO and OprP
opuA	K05847		3.A.1.12.10_Q87WH5;3.A.1.12.11_Q8Q041;3.A.1.12.14_Q8ZPK4;3.A.1.12.15_P33360;3.A.1.12.4_O34992;3.A.1.12.8_Q93A35	osmoprotectant transport system ATP-binding protein
opuBD	K05846		3.A.1.12.10_Q87WH4;3.A.1.12.11_Q8Q042;3.A.1.12.11_Q8Q043;3.A.1.12.14_Q8ZPK1;3.A.1.12.14_Q8ZPK3;3.A.1.12.15_P33359;3.A.1.12.15_P33361;3.A.1.12.4_O34742;3.A.1.12.4_O34878;3.A.1.12.8_Q93A34	osmoprotectant transport system permease protein
opuC	K05845		3.A.1.12.10_Q87WH3;3.A.1.12.11_Q8Q040;3.A.1.12.14_Q8ZPK2;3.A.1.12.15_P33362;3.A.1.12.4_O32243	osmoprotectant transport system substrate-binding protein
oqxB	K19585		2.A.6.2.47	multidrug efflux pump
otsA	K00697	2.4.1.15;2.4.1.347		trehalose 6-phosphate synthase [EC:2.4.1.15 2.4.1.347]	1
otsB	K01087	3.1.3.12		trehalose 6-phosphate phosphatase [EC:3.1.3.12]	1
oxlT	K08177		2.A.1.11.3_P37662	MFS transporter, OFA family, oxalate/formate antiporter
oxyR	K04761			LysR family transcriptional regulator, hydrogen peroxide-inducible genes activator	1
paa	K02030		2.A.56.3.1_P74223;3.A.1.3.15_P54535;3.A.1.3.15_P54536;3.A.1.3.23_Q9HU31;3.A.1.3.24_Q9F3K5;3.A.1.3.25_Q9CES5;3.A.1.3.27_Q8RCC4	polar amino acid transport system substrate-binding protein
paaF	K01692	4.2.1.17		enoyl-CoA hydratase [EC:4.2.1.17]
panF	K14392		2.A.21.1	sodium/pantothenate symporter
pap	K02029		3.A.1.3.15_P54536;3.A.1.3.23_Q9HU29;3.A.1.3.23_Q9HU30;3.A.1.3.24_Q9F3K6	polar amino acid transport system permease protein
pas	K02028	3.6.3.21	3.A.1.3.15_P54537;3.A.1.3.23_Q9HU32;3.A.1.3.24_Q9F3K7;3.A.1.3.25_Q9CES4	polar amino acid transport system ATP-binding protein [EC:3.6.3.21]
patG	K24454	1.3.3.16;3.4.-.-		patG; thiazoline dehydrogenase / protease [EC:1.3.3.16 3.4.-.-]	Serine peptidases_Family S8: subtilisin family;S8
pbp4b	K21469	3.4.16.4		pbp4b; serine-type D-Ala-D-Ala carboxypeptidase [EC:3.4.16.4]	Serine peptidases_Family S12: D-Ala-D-Ala carboxypeptidase B family;S12
pbpG	K07262	3.4.21.-		pbpG; serine-type D-Ala-D-Ala endopeptidase (penicillin-binding protein 7) [EC:3.4.21.-]	Serine peptidases_Family S11: D-Ala-D-Ala carboxypeptidase A family;S11
pbuE	K18567		2.A.1.2.25_Q797E3	MFS transporter, DHA1 family, purine base/nucleoside efflux pump
pbuG	K06901		2.A.40.7.2_O34987;2.A.40.7.4_P31440;2.A.40.7.5_P0AF52;2.A.40.7.6_P31466;2.A.40.7.7_Q46817	putative MFS transporter, AGZA family, xanthine/uracil permease
pcbA	K08918			chlorophyll a/b binding light-harvesting protein PcbA
pcbB	K08919			chlorophyll a/b binding light-harvesting protein PcbB
pcbC	K08920			chlorophyll a/b binding light-harvesting protein PcbC
pcbD	K08921			chlorophyll a/b binding light-harvesting protein PcbD
pcbE	K08922			chlorophyll a/b binding light-harvesting protein PcbE
pcbF	K08923			chlorophyll a/b binding light-harvesting protein PcbF
pcbG	K08924			chlorophyll a/b binding light-harvesting protein PcbG
pcbH	K08925			chlorophyll a/b binding light-harvesting protein PcbH
pcc1	K15036	6.4.1.2;6.4.1.3;2.1.3.15		acetyl-CoA/propionyl-CoA carboxylase [EC:6.4.1.2 6.4.1.3 2.1.3.15]
pcc2	K15037			biotin carboxyl carrier protein
pcc3	K18604	6.4.1.2;6.4.1.3;2.1.3.15		acetyl-CoA/propionyl-CoA carboxylase [EC:6.4.1.2 6.4.1.3 2.1.3.15]
pcc4	K18605			biotin carboxyl carrier protein
pcc5	K18603	6.4.1.2;6.4.1.3		acetyl-CoA/propionyl-CoA carboxylase [EC:6.4.1.2 6.4.1.3]
pcc6	K01964	6.4.1.2;6.4.1.3		acetyl-CoA/propionyl-CoA carboxylase [EC:6.4.1.2 6.4.1.3]
pcc7	K15052	6.4.1.3;2.1.3.15		propionyl-CoA carboxylase [EC:6.4.1.3 2.1.3.15]
pccB	K19312	2.1.3.15;6.4.1.3;6.4.1.2		acetyl-CoA/propionyl-CoA carboxylase carboxyl transferase subunit [EC:2.1.3.15 6.4.1.3 6.4.1.2]
pccX	K22568	6.4.1.3;6.4.1.2		acetyl-CoA/propionyl-CoA carboxylase, PccX subunit [EC:6.4.1.3 6.4.1.2]
pckA1	K01596	4.1.1.32		phosphoenolpyruvate carboxykinase (GTP) [EC:4.1.1.32]
pckA2	K01610	4.1.1.49		E4.1.1.49, pckA; phosphoenolpyruvate carboxykinase (ATP) [EC:4.1.1.49]
pcp	K01304	3.4.19.3		pcp; pyroglutamyl-peptidase [EC:3.4.19.3]	Cysteine peptidases_Family C15: pyroglutamyl peptidase I family;C15
pct	K01026	2.8.3.1		propionate CoA-transferase [EC:2.8.3.1]
pdaD	K02626	4.1.1.19		arginine decarboxylase [EC:4.1.1.19]
pdc	K01568	4.1.1.1		PDC, pdc; pyruvate decarboxylase [EC:4.1.1.1]
pdhA	K00161	1.2.4.1		PDHA, pdhA; pyruvate dehydrogenase E1 component alpha subunit [EC:1.2.4.1]
pdhB	K00162	1.2.4.1		PDHB, pdhB; pyruvate dehydrogenase E1 component beta subunit [EC:1.2.4.1]
pdhC	K00627	2.3.1.12		pyruvate dehydrogenase E2 component (dihydrolipoamide acetyltransferase) [EC:2.3.1.12]
pdhD	K00382	1.8.1.4		DLD, lpd, pdhD; dihydrolipoamide dehydrogenase [EC:1.8.1.4]
pduW	K19697	2.7.2.15		propionate kinase [EC:2.7.2.15]
peb1A	K10039		3.A.1.3.16_Q0P9X8	putative glutamine transport system substrate-binding protein
peb1B	K10040		3.A.1.3.16_A1VZQ3	putative glutamine transport system permease protein
peb1C	K10041	3.6.3.-	3.A.1.3.16_A3ZI83	putative glutamine transport system ATP-binding protein [EC:3.6.3.-]
pecA	K02628			phycoerythrocyanin alpha chain
pecB	K02629			phycoerythrocyanin beta chain
pecC	K02630			phycoerythrocyanin-associated rod linker protein
pecE	K02631	4.4.1.31		phycoerythrocyanin alpha-cysteine-84 phycoviolobilin lyase/isomerase subunit PecE [EC:4.4.1.31]
pecF	K02632	4.4.1.31		phycoerythrocyanin alpha-cysteine-84 phycoviolobilin lyase/isomerase subunit PecF [EC:4.4.1.31]
pepA_M17	K01255	3.4.11.1		CARP, pepA; leucyl aminopeptidase [EC:3.4.11.1]	Metallo peptidases_Family M17: leucyl aminopeptidase family;M17
pepA_M42	K01261	3.4.11.7		pepA; glutamyl aminopeptidase [EC:3.4.11.7]	Metallo peptidases_Family M42: glutamyl aminopeptidase family;M42
pepB	K07751	3.4.11.23		pepB; PepB aminopeptidase [EC:3.4.11.23]	Metallo peptidases_Family M17: leucyl aminopeptidase family;M17
pepck	K20370	4.1.1.38		PEPCK; phosphoenolpyruvate carboxykinase (diphosphate) [EC:4.1.1.38]
pepD_M20	K01270	3.4.13.-		pepD; dipeptidase D [EC:3.4.13.-]	Metallo peptidases_Family M20;M20
pepD_S1	K08372	3.4.21.-		pepD; putative serine protease PepD [EC:3.4.21.-]	Serine peptidases_Family S1: chymotrypsin family;S1
pepDA	K08659	3.4.-.-		pepDA, pepDB; dipeptidase [EC:3.4.-.-]	Cysteine peptidases_Family C69;C69
pepE	K05995	3.4.13.21		pepE; dipeptidase E [EC:3.4.13.21]	Serine peptidases_Family S51;S51
pepF	K08602	3.4.24.-		pepF, pepB; oligoendopeptidase F [EC:3.4.24.-]	Metallo peptidases_Family M3;M3
pepN	K01256	3.4.11.2		pepN; aminopeptidase N [EC:3.4.11.2]	Metallo peptidases_Family M1;M1
pepO	K07386	3.4.24.-		pepO; putative endopeptidase [EC:3.4.24.-]	Metallo peptidases_Family M13: neprilysin family;M13
pepP	K01262	3.4.11.9		pepP; Xaa-Pro aminopeptidase [EC:3.4.11.9]	Metallo peptidases_Family M24;M24
pepQ	K01271	3.4.13.9		pepQ; Xaa-Pro dipeptidase [EC:3.4.13.9]	Metallo peptidases_Family M24;M24
pepT	K01258	3.4.11.4		pepT; tripeptide aminopeptidase [EC:3.4.11.4]	Metallo peptidases_Family M20;M20
pepX	K01281	3.4.14.11		pepX; X-Pro dipeptidyl-peptidase [EC:3.4.14.11]	Serine peptidases_Family S15;S15
perR	K09825			Fur family transcriptional regulator, peroxide stress response regulator	1
petA	K02634			apocytochrome f
petB	K02635			cytochrome b6
petB_1	K03887			menaquinol-cytochrome c reductase cytochrome b subunit
petB_2	K00412			ubiquinol-cytochrome c reductase cytochrome b subunit
petC	K02636	7.1.1.6		cytochrome b6-f complex iron-sulfur subunit [EC:7.1.1.6]
petD	K02637			cytochrome b6-f complex subunit 4
petD_1	K03888			menaquinol-cytochrome c reductase cytochrome b/c subunit
petE	K02638			plastocyanin
petF	K02639			ferredoxin
petG	K02640			cytochrome b6-f complex subunit 5
petH	K02641	1.18.1.2		ferredoxin--NADP+ reductase [EC:1.18.1.2]
petJ	K08906			cytochrome c6
petL	K02642			cytochrome b6-f complex subunit 6
petM	K02643			cytochrome b6-f complex subunit 7
petN	K03689			cytochrome b6-f complex subunit 8
pfk	K21071	2.7.1.11;2.7.1.90		ATP-dependent phosphofructokinase / diphosphate-dependent phosphofructokinase [EC:2.7.1.11 2.7.1.90]
pfkA	K00850	2.7.1.11		6-phosphofructokinase 1 [EC:2.7.1.11]
pfkB	K16370	2.7.1.11		6-phosphofructokinase 2 [EC:2.7.1.11]
pfkC	K00918	2.7.1.146;2.7.1.147		ADP-dependent phosphofructokinase/glucokinase [EC:2.7.1.146 2.7.1.147]
pflA	K04069	1.97.1.4		pyruvate formate lyase activating enzyme [EC:1.97.1.4]
pflD	K00656	2.3.1.54		E2.3.1.54, pflD; formate C-acetyltransferase [EC:2.3.1.54]
pfp	K00895	2.7.1.90		diphosphate-dependent phosphofructokinase [EC:2.7.1.90]
pfpI	K05520	3.5.1.124		pfpI; protease I [EC:3.5.1.124]	Cysteine peptidases_Family C56: PfpI endopeptidase family;C56
pgd	K00033	1.1.1.44;1.1.1.343		PGD, gnd, gntZ; 6-phosphogluconate dehydrogenase [EC:1.1.1.44 1.1.1.343]
pgi	K01810	5.3.1.9		GPI, pgi; glucose-6-phosphate isomerase [EC:5.3.1.9]
pgi_arch	K06859	5.3.1.9		pgi1; glucose-6-phosphate isomerase, archaeal [EC:5.3.1.9]
pgi-pmi	K15916	5.3.1.9;5.3.1.8		pgi-pmi; glucose/mannose-6-phosphate isomerase [EC:5.3.1.9 5.3.1.8]
pgi-tal	K13810	2.2.1.2;5.3.1.9		tal-pgi; transaldolase / glucose-6-phosphate isomerase [EC:2.2.1.2 5.3.1.9]
pgk	K00927	2.7.2.3		phosphoglycerate kinase [EC:2.7.2.3]
pgl_1	K01057	3.1.1.31		PGLS, pgl, devB; 6-phosphogluconolactonase [EC:3.1.1.31]
pgl_2	K07404	3.1.1.31		pgl; 6-phosphogluconolactonase [EC:3.1.1.31]
pglK	K06148		3.A.1.106.15_Q0P9C4;3.A.1.119.4_Q9RK13	ATP-binding cassette, subfamily C, bacterial
pgm	K01835	5.4.2.2		pgm; phosphoglucomutase [EC:5.4.2.2]
pgm2	K15779	5.4.2.2;5.4.2.7		PGM2; phosphoglucomutase / phosphopentomutase [EC:5.4.2.2 5.4.2.7]
pgtE	K08477	3.4.21.-		pgtE; outer membrane protease E [EC:3.4.21.-]	Aspartic peptidases_Family A26: omptin family;A26
phaA	K05559		2.A.63.1	multicomponent K+:H+ antiporter subunit A
phaC	K05560		2.A.63.1	multicomponent K+:H+ antiporter subunit C
phaD	K05561		2.A.63.1	multicomponent K+:H+ antiporter subunit D
phaE	K05562		2.A.63.1	multicomponent K+:H+ antiporter subunit E
phaF	K05563		2.A.63.1	multicomponent K+:H+ antiporter subunit F
phaG	K05564		2.A.63.1	multicomponent K+:H+ antiporter subunit G
phaZ	K05973	3.1.1.75		poly(3-hydroxybutyrate) depolymerase [EC:3.1.1.75]
phaZ2	K07518	3.1.1.22		hydroxybutyrate-dimer hydrolase [EC:3.1.1.22]
phbB	K00023	1.1.1.36		acetoacetyl-CoA reductase [EC:1.1.1.36]
phbC	K03821	2.3.1.-		polyhydroxyalkanoate synthase subunit PhaC [EC:2.3.1.-]
pheP	K11732		2.A.3.1.1_P24207	phenylalanine-specific permease
phnC	K02041	3.6.3.28	3.A.1.9	phosphonate transport system ATP-binding protein [EC:3.6.3.28]
phnD	K02044		3.A.1.9	phosphonate transport system substrate-binding protein
phnE	K02042		3.A.1.9	phosphonate transport system permease protein
phnS	K11081		3.A.1.11.5	2-aminoethylphosphonate transport system substrate-binding protein
phnT	K11084		3.A.1.11.5	2-aminoethylphosphonate transport system ATP-binding protein
phnU	K11083		3.A.1.11.5	2-aminoethylphosphonate transport system permease protein
phnV	K11082		3.A.1.11.5	2-aminoethylphosphonate transport system permease protein
PHO84	K08176		2.A.1.1.15_P95908	MFS transporter, PHS family, inorganic phosphate transporter
phoA	K01077	3.1.3.1		alkaline phosphatase [EC:3.1.3.1]
phoD	K01113	3.1.3.1		alkaline phosphatase D [EC:3.1.3.1]
phoE	K11929		1.B.1.1.2	outer membrane pore protein E
phoN	K09474	3.1.3.2		acid phosphatase (class A) [EC:3.1.3.2]
phoP	K07660			two-component system, OmpR family, response regulator PhoP
phoQ	K07637	2.7.13.3		two-component system, OmpR family, sensor histidine kinase PhoQ [EC:2.7.13.3]
phoX	K07093			uncharacterized protein
phsA	K08352	1.8.5.5		thiosulfate reductase / polysulfide reductase chain A [EC:1.8.5.5]
phsB	K08353			thiosulfate reductase electron transport protein
phsC	K08354			thiosulfate reductase cytochrome b subunit
phy	K01083	3.1.3.8		3-phytase [EC:3.1.3.8]
pilD	K02654	3.4.23.43;2.1.1.-		pilD, pppA; leader peptidase (prepilin peptidase) / N-methyltransferase [EC:3.4.23.43 2.1.1.-]	Aspartic peptidases_Family A24: type IV prepilin peptidase family;A24
pip	K01259	3.4.11.5		pip; proline iminopeptidase [EC:3.4.11.5]	Serine peptidases_Family S33;S33
pipA	K23941			pipA, gogA, gtgA; PipA/GogA/GtgA family effector protease	Metallo peptidases_Family M85;M85
pit	K16322		2.A.20.1	low-affinity inorganic phosphate transporter
pma	K01535	7.1.2.1		H+-transporting ATPase [EC:7.1.2.1]
pmm-pgm	K15778	5.4.2.8;5.4.2.2		pmm-pgm; phosphomannomutase / phosphoglucomutase [EC:5.4.2.8 5.4.2.2]
pmoA-amoA	K10944	1.14.18.3;1.14.99.39		methane/ammonia monooxygenase subunit A [EC:1.14.18.3 1.14.99.39]
pmoB-amoB	K10945			methane/ammonia monooxygenase subunit B
pmoC-amoC	K10946			methane/ammonia monooxygenase subunit C
pnp	K00962	2.7.7.8		polyribonucleotide nucleotidyltransferase [EC:2.7.7.8]
pnuC	K03811		4.B.1.1.1_P24520;4.B.1.1.2_Q4QLL1;4.B.1.1.3_Q9EWJ7;4.B.1.1.5_Q8NU75;4.B.1.1.6_Q837U1	nicotinamide mononucleotide transporter
por	K03737	1.2.7.1;1.2.7.-		pyruvate-ferredoxin/flavodoxin oxidoreductase [EC:1.2.7.1 1.2.7.-]
porA	K00169	1.2.7.1		pyruvate ferredoxin oxidoreductase alpha subunit [EC:1.2.7.1]
porB	K00170	1.2.7.1		pyruvate ferredoxin oxidoreductase beta subunit [EC:1.2.7.1]
porB1	K08719		1.B.2.2	outer membrane protein B
porD	K00171	1.2.7.1		pyruvate ferredoxin oxidoreductase delta subunit [EC:1.2.7.1]
porG	K00172	1.2.7.1		pyruvate ferredoxin oxidoreductase gamma subunit [EC:1.2.7.1]
potE	K03756			putrescine:ornithine antiporter
poxB	K00156	1.2.5.1		pyruvate dehydrogenase (quinone) [EC:1.2.5.1]
ppa	K01507	3.6.1.1		inorganic pyrophosphatase [EC:3.6.1.1]
ppaC	K15986	3.6.1.1		manganese-dependent inorganic pyrophosphatase [EC:3.6.1.1]
ppaX	K06019	3.6.1.1		pyrophosphatase PpaX [EC:3.6.1.1]
ppc	K01595	4.1.1.31		phosphoenolpyruvate carboxylase [EC:4.1.1.31]
ppdK	K01006	2.7.9.1		pyruvate, orthophosphate dikinase [EC:2.7.9.1]
ppgK	K00886	2.7.1.63		ppgK; polyphosphate glucokinase [EC:2.7.1.63]
ppk	K00937	2.7.4.1		polyphosphate kinase [EC:2.7.4.1]
ppk2	K22468	2.7.4.1		polyphosphate kinase [EC:2.7.4.1]
pps	K01007	2.7.9.2		pyruvate, water dikinase [EC:2.7.9.2]
pqqL	K07263	3.4.24.-		pqqL; zinc protease [EC:3.4.24.-]	Metallo peptidases_Family M16: pitrilysin family;M16
prc	K03797	3.4.21.102		E3.4.21.102, prc, ctpA; carboxyl-terminal processing protease [EC:3.4.21.102]	Serine peptidases_Family S41: C-terminal processing peptidase family;S41
preP	K06972	3.4.24.-		PITRM1, PreP, CYM1; presequence protease [EC:3.4.24.-]	Metallo peptidases_Family M16: pitrilysin family;M16
prk	K00855	2.7.1.19		phosphoribulokinase [EC:2.7.1.19]
prlC	K01414	3.4.24.70		prlC; oligopeptidase A [EC:3.4.24.70]	Metallo peptidases_Family M3;M3
proA	K00147	1.2.1.41		glutamate-5-semialdehyde dehydrogenase [EC:1.2.1.41]	1
proB	K00931	2.7.2.11		glutamate 5-kinase [EC:2.7.2.11]	1
proC	K00286	1.5.1.2		pyrroline-5-carboxylate reductase [EC:1.5.1.2]	1
proP	K03762		2.A.1.6.4_P0C0L7	MFS transporter, MHS family, proline/betaine transporter
proV	K02000	3.6.3.32	3.A.1.12.12_Q9HTI8;3.A.1.12.1_P14175;3.A.1.12.2_P46920;3.A.1.12.5_Q9RQ06;3.A.1.12.6_Q9KKE1;3.A.1.12.9_Q8U4S5	glycine betaine/proline transport system ATP-binding protein [EC:3.6.3.32]
proW	K02001		3.A.1.12.12_Q9HTI7;3.A.1.12.1_P14176;3.A.1.12.2_P46921;3.A.1.12.6_Q9KKE2;3.A.1.12.9_Q8U4S4	glycine betaine/proline transport system permease protein
proX	K02002		3.A.1.12.12_Q9HTH6;3.A.1.12.12_Q9HTI6;3.A.1.12.12_Q9HZ04;3.A.1.12.1_P0AFM2;3.A.1.12.2_P46921;3.A.1.12.2_P46922;3.A.1.12.5_Q9RQ05;3.A.1.12.6_Q9KKE3;3.A.1.12.9_Q8U4S3	glycine betaine/proline transport system substrate-binding protein
proY	K11736		2.A.3.1.23_P0AAE2;2.A.3.1.6_P37460	proline-specific permease ProY
prrA	K07671			two-component system, OmpR family, response regulator PrrA
prrB	K07655	2.7.13.3		two-component system, OmpR family, sensor histidine kinase PrrB [EC:2.7.13.3]
prs	K00948	2.7.6.1		PRPS, prsA; ribose-phosphate pyrophosphokinase [EC:2.7.6.1]
prsW	K24131	3.4.-.-		prsW; protease PrsW [EC:3.4.-.-]	Metallo peptidases_Family M82;M82
prtC_U32	K08303	3.4.-.-		prtC, trhP; U32 family peptidase [EC:3.4.-.-]	Peptidases of unknown catalytic type_Family U32;U32
psaA	K02689			photosystem I P700 chlorophyll a apoprotein A1, photosystem I reaction center subunit Ia
psaB	K02690			photosystem I P700 chlorophyll a apoprotein A2
psaC	K02691			photosystem I subunit VII, photosystem I iron-sulfur center
psaD	K02692			photosystem I subunit II, photosystem I reaction center subunit II (PsaD)
psaE	K02693			photosystem I subunit IV, photosystem I reaction centre subunit IV/PsaE
psaF	K02694			photosystem I subunit III, photosystem I reaction center subunit III (PsaF)
psaI	K02696			photosystem I subunit VIII, reaction center subunit VIII
psaJ	K02697			photosystem I subunit IX, photosystem I reaction centre subunit IX (PsaJ)
psaK	K02698			photosystem I subunit X, photosystem I reaction center subunit X (PsaK)
psaL	K02699			photosystem I subunit XI, photosystem I reaction center subunit XI (PsaL)
psaM	K02700			photosystem I subunit XII, photosystem I reaction centre subunit XII (PsaM)
psaX	K02702			photosystem I 4.8kDa protein
psb27	K08902			photosystem II Psb27 protein, photosystem II reaction center Psb27 protein
psb28	K08903			photosystem II 13kDa protein, photosystem II reaction center Psb28 protein
psb28-2	K08904			photosystem II Psb28-2 protein, photosystem II reaction center W protein
psbA	K02703	1.10.3.9		photosystem II P680 reaction center D1 protein [EC:1.10.3.9]
psbB	K02704			photosystem II CP47 chlorophyll apoprotein, photosystem II CP47 reaction center protein
psbC	K02705			photosystem II CP43 chlorophyll apoprotein, photosystem II 44 kDa subunit reaction center protein
psbD	K02706	1.10.3.9		photosystem II P680 reaction center D2 protein [EC:1.10.3.9]
psbE	K02707			photosystem II cytochrome b559 subunit alpha, cytochrome b559 alpha subunit (PSII reaction center subunit V)
psbF	K02708			photosystem II cytochrome b559 subunit beta, photosystem II reaction center subunit VI
psbH	K02709			photosystem II PsbH protein, photosystem II reaction center protein H
psbI	K02710			photosystem II PsbI protein, photosystem II reaction center I protein (PsbI)
psbJ	K02711			photosystem II PsbJ protein, photosystem II reaction center J protein
psbK	K02712			photosystem II PsbK protein, photosystem II reaction center protein K
psbL	K02713			photosystem II PsbL protein, photosystem II reaction center L protein
psbM	K02714			photosystem II PsbM protein, photosystem II reaction center M protein
psbN	K02715			photosystem II PsbN protein, photosystem II reaction centre N protein (psbN)
psbO	K02716			photosystem II oxygen-evolving enhancer protein 1
psbP	K02717			photosystem II oxygen-evolving enhancer protein 2
psbT	K02718			photosystem II PsbT protein, photosystem II reaction center protein T
psbU	K02719			photosystem II PsbU protein, photosystem II 12 kDa extrinsic protein, chloroplastic
psbV	K02720			photosystem II cytochrome c550
psbX	K02722			photosystem II PsbX protein, photosystem II reaction center X
psbY	K02723			photosystem II PsbY protein, photosystem II reaction center Y protein
psbZ	K02724			photosystem II PsbZ protein, photosystem II reaction center Z protein
pscA	K08940			photosystem P840 reaction center large subunit
pscB	K08941			photosystem P840 reaction center iron-sulfur protein
pscC	K08942			photosystem P840 reaction center cytochrome c551
pscD	K08943			photosystem P840 reaction center protein PscD
pslA	K20997			polysaccharide biosynthesis protein PslA
pslB	K16011	2.7.7.13;5.3.1.8		mannose-1-phosphate guanylyltransferase / mannose-6-phosphate isomerase [EC:2.7.7.13 5.3.1.8]
pslD	K20987		1.B.18	polysaccharide biosynthesis/export protein PslD
pslE	K20998			polysaccharide biosynthesis protein PslE
pslF	K20999			polysaccharide biosynthesis protein PslF
pslG	K21000			polysaccharide biosynthesis protein PslG
pslH	K21001			polysaccharide biosynthesis protein PslH
pslI	K21002			polysaccharide biosynthesis protein PslI
pslJ	K21003			polysaccharide biosynthesis protein PslJ
pslK	K21004			polysaccharide biosynthesis protein PslK
pslL	K21005			polysaccharide biosynthesis protein PslL
pelA	K21006			polysaccharide biosynthesis protein PelA
pelB	K21007			polysaccharide biosynthesis protein PelB
pelC	K21008			polysaccharide biosynthesis protein PelC
pelD	K21009			polysaccharide biosynthesis protein PelD
pelE	K21010			polysaccharide biosynthesis protein PelE
pelF	K21011			polysaccharide biosynthesis protein PelF
pelG	K21012			polysaccharide biosynthesis protein PelG
psmA	K03432	3.4.25.1		psmA, prcA; proteasome alpha subunit [EC:3.4.25.1]	Threonine peptidases_Family T1: proteasome family;T1
psmB	K03433	3.4.25.1		psmB, prcB; proteasome beta subunit [EC:3.4.25.1]	Threonine peptidases_Family T1: proteasome family;T1
psp	K22305	3.1.3.3		phosphoserine phosphatase [EC:3.1.3.3]
pspA	K03969			phage shock protein A
pspB	K03970			phage shock protein B
pspC	K03973			phage shock protein C
pspD	K03971			phage shock protein D
pspE	K03972			phage shock protein E
pspF	K03974			psp operon transcriptional activator
pstA	K02038		3.A.1.7	phosphate transport system permease protein
pstB	K02036	3.6.3.27	3.A.1.7	phosphate transport system ATP-binding protein [EC:3.6.3.27]
pstC	K02037		3.A.1.7	phosphate transport system permease protein
pstS	K02040		3.A.1.7	phosphate transport system substrate-binding protein
psuT	K16324		2.A.41.2.10_P33021	putative pseudouridine transporter
pta1	K00625	2.3.1.8		E2.3.1.8, pta; phosphate acetyltransferase [EC:2.3.1.8]
pta2	K13788	2.3.1.8		phosphate acetyltransferase [EC:2.3.1.8]
pta3	K15024	2.3.1.8		putative phosphotransacetylase [EC:2.3.1.8]
ptb	K00634	2.3.1.19		phosphate butyryltransferase [EC:2.3.1.19]
ptpA	K18574	3.4.14.12		ptpA; Xaa-Xaa-Pro tripeptidyl-peptidase [EC:3.4.14.12]	Serine peptidases_Family S9: prolyl oligopeptidase family;S9
ptrA	K01407	3.4.24.55		ptrA; protease III [EC:3.4.24.55]	Metallo peptidases_Family M16: pitrilysin family;M16
ptrB	K01354	3.4.21.83		ptrB; oligopeptidase B [EC:3.4.21.83]	Serine peptidases_Family S9: prolyl oligopeptidase family;S9
ptsH	K02784		8.A.8.1.1	phosphocarrier protein HPr
ptsI	K08483	2.7.3.9	4.A.2.1.26_Q5V5X2	phosphotransferase system, enzyme I, PtsI [EC:2.7.3.9]
ptsO	K08485			phosphocarrier protein NPr
ptsP	K08484	2.7.3.9		phosphotransferase system, enzyme I, PtsP [EC:2.7.3.9]
pucA	K08930			light-harvesting protein B-800-850 alpha chain
pucB	K08939			light-harvesting protein B-800-850 beta chain
pucJ	K16170		2.A.40.3.2	uric acid permease
pufA	K08926			light-harvesting complex 1 alpha chain
pufB	K08927			light-harvesting complex 1 beta chain
pufC	K13992			photosynthetic reaction center cytochrome c subunit
pufL	K08928			photosynthetic reaction center L subunit
pufM	K08929			photosynthetic reaction center M subunit
pufX	K13994			photosynthetic reaction center PufX protein
puhA	K13991			photosynthetic reaction center H subunit
putB	K00318	1.5.5.2		proline dehydrogenase [EC:1.5.5.2]
putP	K11928		2.A.21.2.1_P07117;2.A.21.2.2_Q7A4Q7;2.A.21.2.3_Q9I5F5;2.A.21.2.4_J7JIE8;2.A.21.2.6_O24896	sodium/proline symporter
puuP	K14052		2.A.3.1.13	putrescine importer
pvdE	K06160		3.A.1.113.2	putative ATP-binding cassette transporter
pyc	K01958	6.4.1.1		pyruvate carboxylase [EC:6.4.1.1]
pycA	K01959	6.4.1.1		pyruvate carboxylase subunit A [EC:6.4.1.1]
pycB	K01960	6.4.1.1		pyruvate carboxylase subunit B [EC:6.4.1.1]
pyk	K00873	2.7.1.40		PK, pyk; pyruvate kinase [EC:2.7.1.40]
qcrA	K03890			ubiquinol-cytochrome c reductase iron-sulfur subunit
qcrB	K03891			ubiquinol-cytochrome c reductase cytochrome b subunit
qcrC	K03889			ubiquinol-cytochrome c reductase cytochrome c subunit
qhpA	K08685	1.4.9.1		quinohemoprotein amine dehydrogenase [EC:1.4.9.1]
qmoA	K16885			quinone-modifying oxidoreductase, subunit QmoA
qmoB	K16886			quinone-modifying oxidoreductase, subunit QmoB
qmoC	K16887			quinone-modifying oxidoreductase, subunit QmoC
qoxA	K02826	7.1.1.5		cytochrome aa3-600 menaquinol oxidase subunit II [EC:7.1.1.5]
qoxB	K02827	7.1.1.5		cytochrome aa3-600 menaquinol oxidase subunit I [EC:7.1.1.5]
qoxC	K02828	7.1.1.5		cytochrome aa3-600 menaquinol oxidase subunit III [EC:7.1.1.5]
qoxD	K02829	7.1.1.5		cytochrome aa3-600 menaquinol oxidase subunit IV [EC:7.1.1.5]
rbcL	K01601	4.1.1.39		ribulose-bisphosphate carboxylase large chain [EC:4.1.1.39]
rbcS	K01602	4.1.1.39		ribulose-bisphosphate carboxylase small chain [EC:4.1.1.39]
rbsA	K10441	3.6.3.17	3.A.1.2.20_G4FGN3	ribose transport system ATP-binding protein [EC:3.6.3.17]
rbsB	K10439		3.A.1.2.20_G4FGN5	ribose transport system substrate-binding protein
rbsC	K10440		3.A.1.2.18_Q9WXW7;3.A.1.2.20_G4FGN4;3.A.1.2.6_P32720	ribose transport system permease protein
rbsU	K06216		2.A.7.5	putative ribose uptake protein
rcnA	K08970		2.A.52.2	nickel/cobalt exporter
regA	K15012			two-component system, response regulator RegA
regB	K15011	2.7.13.3		two-component system, sensor histidine kinase RegB [EC:2.7.13.3]
relB	K18918			RHH-type transcriptional regulator, rel operon repressor / antitoxin RelB	1
relE	K06218			mRNA interferase RelE/StbE	1
resD	K07775			two-component system, OmpR family, response regulator ResD
resE	K07651	2.7.13.3		two-component system, OmpR family, sensor histidine kinase ResE [EC:2.7.13.3]
rhaP	K10560		3.A.1.2.9_Q7BSH3	rhamnose transport system permease protein
rhaQ	K10561		3.A.1.2.9	rhamnose transport system permease protein
rhaS	K10559		3.A.1.2.9_Q7BSH5	rhamnose transport system substrate-binding protein
rhaT1	K10562	3.6.3.17	3.A.1.2.9_Q7BSH4	rhamnose transport system ATP-binding protein [EC:3.6.3.17]
rhaT2	K02856		2.A.7.6.1_P27125;2.A.7.6.2_M5UGY9;2.A.7.6.3_I3CAS8	L-rhamnose-H+ transport protein
rhtA	K11939		2.A.7.3.6_P0AA67	inner membrane transporter RhtA
rhtB	K05834		2.A.76.1.1_P0AG34	homoserine/homoserine lactone efflux protein
rhtC	K05835		2.A.76.1.2_P0AG38	threonine efflux protein
ribP	K02050		3.A.1.17.11_D1CEG9;3.A.1.17.14_A9WGD1;3.A.1.17.7_A7NLS3	NitT/TauT family transport system permease protein
ribS	K02051		3.A.1.17.11_D1CEG8;3.A.1.17.14_A9WGD2;3.A.1.17.7_A7NLS2	NitT/TauT family transport system substrate-binding protein
ripA	K21473	3.4.-.-		ripA; peptidoglycan DL-endopeptidase RipA [EC:3.4.-.-]	Cysteine peptidases_Family C40;C40
ripB	K21474	3.4.-.-		ripB; peptidoglycan DL-endopeptidase RipB [EC:3.4.-.-]	Cysteine peptidases_Family C40;C40
rnfA	K03617			Na+-translocating ferredoxin:NAD+ oxidoreductase subunit A
rnfB	K03616	7.2.1.2		Na+-translocating ferredoxin:NAD+ oxidoreductase subunit B [EC:7.2.1.2]
rnfC	K03615	7.2.1.2		Na+-translocating ferredoxin:NAD+ oxidoreductase subunit C [EC:7.2.1.2]
rnfD	K03614	7.2.1.2		Na+-translocating ferredoxin:NAD+ oxidoreductase subunit D [EC:7.2.1.2]
rnfE	K03613			Na+-translocating ferredoxin:NAD+ oxidoreductase subunit E
rnfG	K03612			Na+-translocating ferredoxin:NAD+ oxidoreductase subunit G
rnr	K12573	3.1.13.1		ribonuclease R [EC:3.1.13.1]
rocD	K00819	2.6.1.13		ornithine--oxo-acid transaminase [EC:2.6.1.13]	1
rocE	K02205		2.A.3.1.11_P39137	arginine/ornithine permease
rocF	K01476	3.5.3.1		arginase [EC:3.5.3.1]
rpcG	K20713	4.4.1.33		R-phycocyanin alpha-cysteine-84 phycourobilin lyase/isomerase [EC:4.4.1.33]
rpe	K01783	5.1.3.1		rpe, RPE; ribulose-phosphate 3-epimerase [EC:5.1.3.1]
rpiA	K01807	5.3.1.6		ribose 5-phosphate isomerase A [EC:5.3.1.6]
rpiB	K01808	5.3.1.6		ribose 5-phosphate isomerase B [EC:5.3.1.6]
rpoD	K03047	2.7.7.6		DNA-directed RNA polymerase subunit D [EC:2.7.7.6]
rpoDsigma	K03086			RNA polymerase primary sigma factor
rpoE	K03048			DNA-directed RNA polymerase subunit delta
rpoE1	K03049	2.7.7.6		DNA-directed RNA polymerase subunit E' [EC:2.7.7.6]
rpoE2	K03050	2.7.7.6		DNA-directed RNA polymerase subunit E" [EC:2.7.7.6]
rpoEsigma	K03088			RNA polymerase sigma-70 factor, ECF subfamily
rpoH	K03053	2.7.7.6		DNA-directed RNA polymerase subunit H [EC:2.7.7.6]
rpoHsigma	K03089			RNA polymerase sigma-32 factor
rpoN	K03058	2.7.7.6		DNA-directed RNA polymerase subunit N [EC:2.7.7.6]
rpoNsigma	K03092			RNA polymerase sigma-54 factor
rpoS	K03087			RNA polymerase nonessential primary-like sigma factor, sigma38
rseA	K03597			sigma-E factor negative regulatory protein RseA
rseB	K03598			sigma-E factor negative regulatory protein RseB
rseP	K11749	3.4.24.-		rseP; regulator of sigma E protease [EC:3.4.24.-]	Metallo peptidases_Family M50: S2P protease family;M50
rutG	K09016		2.A.40.1.3_P75892	putative pyrimidine permease RutG
sam	K15270		2.A.7.3.54_Q1MIM3	S-adenosylmethionine uptake transporter
sapA	K19226		3.A.1.5.5	cationic peptide transport system substrate-binding protein
sapB	K19227		3.A.1.5.5	cationic peptide transport system permease protein
sapC	K19228		3.A.1.5.5	cationic peptide transport system permease protein
sapD	K19229		3.A.1.5.5	cationic peptide transport system ATP-binding protein
sapF	K19230		3.A.1.5.5	cationic peptide transport system ATP-binding protein
sat	K00958	2.7.7.4		sulfate adenylyltransferase [EC:2.7.7.4]
satP	K07034		2.A.96.1.1_P0AC98	uncharacterized protein
sbp	K23163		3.A.1.6.1;3.A.1.6.3;3.A.1.6.7	sulfate/thiosulfate transport system substrate-binding protein
scaA	K19971		3.A.1.15.2;3.A.1.15.14	manganese/zinc transport system substrate-binding protein
scaB	K19972		3.A.1.15.2;3.A.1.15.14	manganese/zinc transport system permease protein
scaC	K10830	3.6.3.35	3.A.1.15.2;3.A.1.15.14	manganese-transporting ATPase [EC:3.6.3.35]
scpA	K08652	3.4.21.110		C5AP, scpA, scpB; C5a peptidase [EC:3.4.21.110]	Serine peptidases_Family S8: subtilisin family;S8
scpC	K22214	2.8.3.-		propionyl-CoA:succinyl-CoA transferase [EC:2.8.3.-]
scrEIIA	K02808	2.7.1.69	4.A.1.2.10_P15400;4.A.1.2.12_Q8NMD6;4.A.1.2.16_ART98386;4.A.1.2.1_P08470;4.A.1.2.9_P05306	PTS system, sucrose-specific IIA component [EC:2.7.1.69]
scrEIIB	K02809	2.7.1.69	4.A.1.2.10_P15400;4.A.1.2.12_Q8NMD6;4.A.1.2.16_ART98386;4.A.1.2.1_P08470;4.A.1.2.9_P05306	PTS system, sucrose-specific IIB component [EC:2.7.1.69]
scrEIIC	K02810		4.A.1.2.10_P15400;4.A.1.2.12_Q8NMD6;4.A.1.2.16_ART98386;4.A.1.2.1_P08470;4.A.1.2.9_P05306	PTS system, sucrose-specific IIC component
scrK	K00847	2.7.1.4		fructokinase [EC:2.7.1.4]
scrY	K16077		1.B.3.1.2_P22340	sucrose porin
sdaC	K03837		2.A.42.2.1_P0AAD6	serine transporter
sdhA	K00239	1.3.5.1;1.3.5.4		succinate dehydrogenase / fumarate reductase, flavoprotein subunit [EC:1.3.5.1 1.3.5.4]
sdhB	K00240	1.3.5.1;1.3.5.4		succinate dehydrogenase / fumarate reductase, iron-sulfur subunit [EC:1.3.5.1 1.3.5.4]
sdhC	K00241			succinate dehydrogenase / fumarate reductase, cytochrome b subunit
sdhD	K00242			succinate dehydrogenase / fumarate reductase, membrane anchor subunit
sdhD_arch1	K18859			sdhD, frdD; succinate dehydrogenase / fumarate reductase, subunit D
sdhD_arch2	K18860			sdhD, frdD; putative succinate dehydrogenase / fumarate reductase, subunit D
sdo	K17725	1.13.11.18		sulfur dioxygenase [EC:1.13.11.18]
serA	K17050	1.97.1.9;1.97.1.1		selenate/chlorate reductase subunit alpha [EC:1.97.1.9 1.97.1.1]
serB	K17051	1.97.1.9;1.97.1.1		selenate/chlorate reductase subunit beta [EC:1.97.1.9 1.97.1.1]
serC	K17052	1.97.1.9;1.97.1.1		selenate/chlorate reductase subunit gamma [EC:1.97.1.9 1.97.1.1]
sfnG	K17228	1.14.14.35		dimethylsulfone monooxygenase [EC:1.14.14.35]
sgcX	K20609	3.4.11.-		sgcX; putative aminopeptidase [EC:3.4.11.-]	Metallo peptidases_Family M42: glutamyl aminopeptidase family;M42
sipW	K13280	3.4.21.89		SEC11, sipW; signal peptidase I [EC:3.4.21.89]	Serine peptidases_Family S26: signal peptidase I family;S26
sir	K00392	1.8.7.1		sulfite reductase (ferredoxin) [EC:1.8.7.1]
sitA	K11604		3.A.1.15.7;3.A.1.15.9	manganese/iron transport system substrate-binding protein
sitB	K11607		3.A.1.15.7;3.A.1.15.9	manganese/iron transport system ATP-binding protein
sitC	K11605		3.A.1.15.7;3.A.1.15.9	manganese/iron transport system permease protein
sitD	K11606		3.A.1.15.7;3.A.1.15.9	manganese/iron transport system permease protein
smeB	K18322		2.A.6.2.41	multidrug efflux pump
smeC	K18323		1.B.17;2.A.6.2.41	outer membrane protein, multidrug efflux system
smtA	K14471	2.8.3.22		succinyl-CoA:(S)-malate CoA-transferase subunit A [EC:2.8.3.22]
smtB	K14472	2.8.3.22		succinyl-CoA:(S)-malate CoA-transferase subunit B [EC:2.8.3.22]
sodA	K04564	1.15.1.1		superoxide dismutase, Fe-Mn family [EC:1.15.1.1]	1
soeA	K21307	1.8.5.6		sulfite dehydrogenase (quinone) subunit SoeA [EC:1.8.5.6]
soeB	K21308			sulfite dehydrogenase (quinone) subunit SoeB
soeC	K21309			sulfite dehydrogenase (quinone) subunit SoeC
sohB	K04774	3.4.21.-		sohB; serine protease SohB [EC:3.4.21.-]	Serine peptidases_Family S49: protease IV family;S49
sor	K16952	1.13.11.55		sulfur oxygenase/reductase [EC:1.13.11.55]
sorA	K05301	1.8.2.1		sulfite dehydrogenase [EC:1.8.2.1]
sorB	K00386	1.8.2.1		sulfite dehydrogenase (cytochrome) subunit B [EC:1.8.2.1]
sorEIIA	K02812	2.7.1.69	4.A.6.1.3_P37080	PTS system, sorbose-specific IIA component [EC:2.7.1.69]
sorEIIB	K02813	2.7.1.69	4.A.6.1.24_A1RZ66;4.A.6.1.3_P37081	PTS system, sorbose-specific IIB component [EC:2.7.1.69]
sorEIIC	K02814		4.A.6.1.1_P69801;4.A.6.1.3_P37082	PTS system, sorbose-specific IIC component
sorEIID	K02815		4.A.6.1.3_P37083	PTS system, sorbose-specific IID component
sotB	K08159		2.A.1.2.15_P31122;2.A.1.2.18_Q9S3J9	MFS transporter, DHA1 family, L-arabinose/isopropyl-beta-D-thiogalactopyranoside export protein
soxA	K17222	2.8.5.2		L-cysteine S-thiosulfotransferase [EC:2.8.5.2]
soxB	K17224	3.1.6.20		S-sulfosulfanyl-L-cysteine sulfohydrolase [EC:3.1.6.20]
soxC	K17225			sulfane dehydrogenase subunit SoxC
soxD	K22622	1.8.2.6		S-disulfanyl-L-cysteine oxidoreductase SoxD [EC:1.8.2.6]
soxR	K13639			MerR family transcriptional regulator, redox-sensitive transcriptional activator SoxR	1
soxS	K13631			AraC family transcriptional regulator, mar-sox-rob regulon activator
soxX	K17223	2.8.5.2		L-cysteine S-thiosulfotransferase [EC:2.8.5.2]
soxY	K17226			sulfur-oxidizing protein SoxY
soxZ	K17227			sulfur-oxidizing protein SoxZ
speA	K01585	4.1.1.19		arginine decarboxylase [EC:4.1.1.19]
speF	K01581	4.1.1.17		ornithine decarboxylase [EC:4.1.1.17]
spoIIGA	K06383	3.4.23.-		spoIIGA; stage II sporulation protein GA (sporulation sigma-E factor processing peptidase) [EC:3.4.23.-]	Aspartic peptidases_Family A36;A36
sppA	K04773	3.4.21.-		sppA; protease IV [EC:3.4.21.-]	Serine peptidases_Family S49: protease IV family;S49
sprE	K18548	3.4.21.82		sprE; glutamyl endopeptidase II [EC:3.4.21.82]	Serine peptidases_Family S1: chymotrypsin family;S1
sqr	K17218	1.8.5.4		sulfide:quinone oxidoreductase [EC:1.8.5.4]
sreA	K17219	1.12.98.4		sulfur reductase molybdopterin subunit
sreB	K17220			sulfur reductase FeS subunit
sreC	K17221			sulfur reductase membrane anchor
ssadh	K14465	1.1.1.-		succinate semialdehyde reductase (NADPH) [EC:1.1.1.-]
sseA	K01011	2.8.1.1;2.8.1.2		thiosulfate/3-mercaptopyruvate sulfurtransferase [EC:2.8.1.1 2.8.1.2]
ssgdh	K18125	1.1.1.359		ssgdh; aldose 1-dehydrogenase [NAD(P)+] [EC:1.1.1.359]
sspA	K01318	3.4.21.19		sspA; glutamyl endopeptidase [EC:3.4.21.19]	Serine peptidases_Family S1: chymotrypsin family;S1
sstT	K07862		2.A.23.4.1_P0AGE4	serine/threonine transporter
ssuA	K15553		3.A.1.17.2	sulfonate transport system substrate-binding protein
ssuB	K15555	3.6.3.-	3.A.1.17.2	sulfonate transport system ATP-binding protein [EC:3.6.3.-]
ssuC	K15554		3.A.1.17.2	sulfonate transport system permease protein
ssuD	K04091	1.14.14.5		alkanesulfonate monooxygenase [EC:1.14.14.5]
ssuE	K00299	1.5.1.38		FMN reductase [EC:1.5.1.38]
steA	K18216		3.A.1	ATP-binding cassette, subfamily B, tetracycline resistant protein
steB	K18217		3.A.1	ATP-binding cassette, subfamily B, tetracycline resistant protein
sucC	K01903	6.2.1.5		succinyl-CoA synthetase beta subunit [EC:6.2.1.5]
sucD	K01902	6.2.1.5		succinyl-CoA synthetase alpha subunit [EC:6.2.1.5]
sugA	K02056	3.6.3.17	3.A.1.2.14_Q0HIQ7;3.A.1.2.20_G4FGN3;3.A.1.2.23_Q8G847;3.A.1.2.25_Q6BEX0;3.A.1.2.27_P77509;3.A.1.2.10_O83341;3.A.1.2.12_Q8DU37;3.A.1.2.17_A2RKA7;3.A.1.2.28_R9USS2	simple sugar transport system ATP-binding protein [EC:3.6.3.17]
sugP	K02025		3.A.1.1.31_O50452;3.A.1.1.37_Q9WYB4;3.A.1.1.41_G4FGN7;3.A.1.1.42_Q9FBS6;3.A.1.1.43_Q9FBS6;3.A.1.1.46_P0AFR7;3.A.1.1.48_D6ZW63;3.A.1.1.7_O51924	multiple sugar transport system permease protein
sugP1	K02026		3.A.1.1.31_O50453;3.A.1.1.41_G4FGN6;3.A.1.1.46_P77716;3.A.1.1.48_D6ZW62;3.A.1.1.7_O51925	multiple sugar transport system permease protein
sugP2	K02057		3.A.1.2.14_Q0HIQ5;3.A.1.2.14_Q0HIQ6;3.A.1.2.18_Q9WXW0;3.A.1.2.23_Q8G845;3.A.1.2.23_Q8G846;3.A.1.2.25_P37772;3.A.1.2.25_P39328;3.A.1.2.27_P77315;3.A.1.2.10_O83342;3.A.1.2.10_O83343;3.A.1.2.12_Q8DU38;3.A.1.2.12_Q8DU39;3.A.1.2.17_A2RKA5;3.A.1.2.17_A2RKA6;3.A.1.2.28_O83323;3.A.1.2.28_O83324	simple sugar transport system permease protein
sugS1	K02027		3.A.1.1.31_Q7D8J9;3.A.1.1.41_G4FGN8;3.A.1.1.42_Q9FBS5;3.A.1.1.43_Q9FBS5;3.A.1.1.46_P76042;3.A.1.1.48_D6ZW64;3.A.1.1.7_O51923	multiple sugar transport system substrate-binding protein
sugS2	K02058		3.A.1.2.14_Q0HIQ8;3.A.1.2.23_Q8G848;3.A.1.2.25_P39325;3.A.1.2.27_P77269;3.A.1.2.28_R9UW99	simple sugar transport system substrate-binding protein
suox	K00387	1.8.3.1		sulfite oxidase [EC:1.8.3.1]
syrD	K06161		3.A.1.113.1	putative ATP-binding cassette transporter
tadC	K12511			tight adherence protein C
tagG	K09692		3.A.1.104	teichoic acid transport system permease protein
tagH	K09693	3.6.3.40	3.A.1.104	teichoic acid transport system ATP-binding protein [EC:3.6.3.40]
tal	K00616	2.2.1.2		E2.2.1.2, talA, talB; transaldolase [EC:2.2.1.2]
tauA	K15551		3.A.1.17.1;3.A.1.17.4	taurine transport system substrate-binding protein
tauB	K10831	3.6.3.36	3.A.1.17.1;3.A.1.17.4	taurine transport system ATP-binding protein [EC:3.6.3.36]
tauC	K15552		3.A.1.17.1;3.A.1.17.4	taurine transport system permease protein
tauD	K03119	1.14.11.17		taurine dioxygenase [EC:1.14.11.17]
tc_2.A.76.1.6	K16327		2.A.76.1.6_Q3J2V9	putative LysE/RhtB family amino acid efflux pump
tc.aat	K03293		2.A.3.1.20_F2HQ24;2.A.3.1.21_F2HQ25	amino acid transporter, AAT family
tc.agcs	K03310		2.A.25.1.10_P30143;2.A.25.1.1_P30144;2.A.25.1.2_P30145;2.A.25.1.3_Q6LX42;2.A.25.1.4_Q8EII1;2.A.25.1.5_Q45068;2.A.25.1.9_W0WFC6	alanine or glycine:cation symporter, AGCS family
tc.apa	K03294		2.A.3.3.16_Q9L100;2.A.3.3.22_Q8R706;2.A.3.3.23_s6ex81;2.A.3.8.12_O34739;2.A.3.8.28_K1M2K1	basic amino acid/polyamine antiporter, APA family
tc.bat2	K09936		2.A.7.21.9_D3P9M1;2.A.7.21.5_G8WDN2;2.A.7.21.5_G8WDN3	bacterial/archaeal transporter family-2 protein
tc.citmhs	K03300		2.A.11.1.6_A4QA05	citrate-Mg2+:H+ or citrate-Ca2+:H+ symporter, CitMHS family
tc.cnt	K03317		2.A.41.2.11_Q9KPL5	concentrative nucleoside transporter, CNT family
tc.dass	K03319		2.A.47.3.4_Q6D017	divalent anion:Na+ symporter, DASS family
TC.DME	K03298		2.A.7.3	drug/metabolite transporter, DME family
tc.fev	K02014		1.B.14.12.1_Q9A608;1.B.14.12.2_Q9AAZ6;1.B.14.6.1_Q45780;1.B.14.1.10_Q82VI7;1.B.14.1.11_P11461;1.B.14.1.12_Q9HXB2;1.B.14.1.15_Q05202;1.B.14.1.17_Q01674;1.B.14.1.21_B6R297;1.B.14.1.26_Q8G8W9;1.B.14.1.7_A4LBD1;1.B.14.14.1_Q8A552;1.B.14.8.2_Q2M5P4;1.B.14.9.3_Q7CGN6	iron complex outermembrane recepter protein
TC.GNTP	K03299		2.A.8	gluconate:H+ symporter, GntP family
tc.gph	K03292		2.A.2.3.12_Q745T8;2.A.2.3.7_Q0HIQ0	glycoside/pentoside/hexuronide:cation symporter, GPH family
TC.HAE1	K03296		2.A.6.3.1_P25197;2.A.6.3.2_A9CGX6;2.A.6.3.3_E8PBU7;2.A.6.3.4_Q1DEX6;2.A.6.3.6_Q8CX78;2.A.6.2.23_Q6VV68	hydrophobic/amphiphilic exporter-1 (mainly G- bacteria), HAE1 family
tc.livcs	K03311		2.A.26.1.10_P0AD99;2.A.26.1.1_P19072;2.A.26.1.2_P25185;2.A.26.1.3_P54104;2.A.26.1.4_O84558;2.A.26.1.5_C0CGS2;2.A.26.1.8_B8J0B8;2.A.26.1.9_F2HK99	branched-chain amino acid:cation transporter, LIVCS family
tc.ncs1	K03457		2.A.39.5.1_Q082R8;2.A.39.1.5_P94369;2.A.39.3.12_V9SBV7	nucleobase:cation symporter-1, NCS1 family
tc.ncs2	K03458		2.A.40.2.1_P50487	nucleobase:cation symporter-2, NCS2 family
tc.nss	K03308		2.A.22.4.1_O50649;2.A.22.4.3_Q8NRL8;2.A.22.5.2_Q8RHM5	neurotransmitter:Na+ symporter, NSS family
tc.pot	K03305		2.A.17.1.1_P0C2U2;2.A.17.1.2_P77304;2.A.17.1.3_P36837;2.A.17.1.6_Q5M4H8;2.A.17.4.7_Q8EKT7	proton-dependent oligopeptide transporter, POT family
tc.sss	K03307		2.A.21.2.2_Q7A4Q7;2.A.21.2.5_M1TZ79;2.A.21.3.19_Q8AAV7;2.A.21.3.21_P31448;2.A.21.3.2_P96169;2.A.21.3.9_A8H019;2.A.21.4.1_Q8VM88	solute:Na+ symporter, SSS family
tc.sulp	K03321		2.A.53.3.13_Q1J2S8	sulfate permease, SulP family
tc2.A.86.1.7	K20469		2.A.86.1.7	putative heme transporter
tctA	K07793		2.A.80.1.4_S5Y5N9	putative tricarboxylic transport membrane protein
tctB	K07794		2.A.80.1.4_S5XH28	putative tricarboxylic transport membrane protein
tctC	K07795		2.A.80.1.4_S5XTE7	putative tricarboxylic transport membrane protein
tcyA	K02424		3.A.1.3.28_B8F896	cystine transport system substrate-binding protein
tcyB	K10009		3.A.1.3.28_B8F897	cystine transport system permease protein
tcyC	K10010	3.6.3.-	3.A.1.3.28_B8F898	cystine transport system ATP-binding protein [EC:3.6.3.-]
tcyJ	K16956		3.A.1.3.13	L-cystine transport system substrate-binding protein
tcyK	K16957		3.A.1.3.13	L-cystine transport system substrate-binding protein
tcyL	K16958		3.A.1.3.13	L-cystine transport system permease protein
tcyM	K16959		3.A.1.3.13	L-cystine transport system permease protein
tcyN	K16960	3.6.3.-	3.A.1.3.13	L-cystine transport system ATP-binding protein [EC:3.6.3.-]
tdcC	K03838		2.A.42.2.2_P0AAD8	threonine transporter
tdcD	K00932	2.7.2.15		propionate kinase [EC:2.7.2.15]
tehA	K03304		2.A.16.1	tellurite resistance protein
tet	K20608	3.4.11.-		tet; tetrahedral aminopeptidase [EC:3.4.11.-]	Metallo peptidases_Family M42: glutamyl aminopeptidase family;M42
tet35	K18218			tetracycline resistance efflux pump
tfrA	K18209	1.3.4.1		fumarate reductase (CoM/CoB) subunit A [EC:1.3.4.1]
tfrB	K18210	1.3.4.1		fumarate reductase (CoM/CoB) subunit B [EC:1.3.4.1]
thiB	K02064		3.A.1.19.2_Q73RE6	thiamine transport system substrate-binding protein
thiP	K02063		3.A.1.19.2_Q73RE5	thiamine transport system permease protein
thiQ	K02062		3.A.1.19.2_Q73RE4	thiamine transport system ATP-binding protein
thiT	K16789		2.A.88.3	thiamine transporter
thrH	K02203	3.1.3.3;2.7.1.39		phosphoserine / homoserine phosphotransferase [EC:3.1.3.3 2.7.1.39]
thuE	K10236		3.A.1.1.12_Q9AI68;3.A.1.1.17_Q9R9Q7;3.A.1.1.19_Q8L126;3.A.1.1.25_Q72H68	trehalose/maltose transport system substrate-binding protein
thuF	K10237		3.A.1.1.12_Q9AI67;3.A.1.1.17_Q9R9Q6;3.A.1.1.19_Q8L125;3.A.1.1.25_Q72H67;3.A.1.1.41_G4FGN7	trehalose/maltose transport system permease protein
thuG	K10238		3.A.1.1.12_Q9AI66;3.A.1.1.17_Q9R9Q5;3.A.1.1.25_Q72H66	trehalose/maltose transport system permease protein
tkt	K00615	2.2.1.1		transketolase [EC:2.2.1.1]
tmm	K18277	1.14.13.148		trimethylamine monooxygenase [EC:1.14.13.148]
tmoC	K15762			toluene monooxygenase system ferredoxin subunit
tmoF	K15765	1.18.1.3		toluene monooxygenase electron transfer component [EC:1.18.1.3]
tmtrA	K00577	2.1.1.86		tetrahydromethanopterin S-methyltransferase subunit A [EC:2.1.1.86]
tmtrB	K00578	2.1.1.86		tetrahydromethanopterin S-methyltransferase subunit B [EC:2.1.1.86]
tmtrC	K00579	2.1.1.86		tetrahydromethanopterin S-methyltransferase subunit C [EC:2.1.1.86]
tmtrD	K00580	2.1.1.86		tetrahydromethanopterin S-methyltransferase subunit D [EC:2.1.1.86]
tmtrE	K00581	2.1.1.86		tetrahydromethanopterin S-methyltransferase subunit E [EC:2.1.1.86]
tmtrF	K00582	2.1.1.86		tetrahydromethanopterin S-methyltransferase subunit F [EC:2.1.1.86]
tmtrG	K00583	2.1.1.86		tetrahydromethanopterin S-methyltransferase subunit G [EC:2.1.1.86]
tmtrH	K00584	2.1.1.86		tetrahydromethanopterin S-methyltransferase subunit H [EC:2.1.1.86]
tnaB	K03836		2.A.42.1.3_P23173	low affinity tryptophan permease
togA	K10195		3.A.1.1.11_Q93KB8	oligogalacturonide transport system ATP-binding protein
togB	K10192		3.A.1.1.11_Q93KB7	oligogalacturonide transport system substrate-binding protein
togM	K10193		3.A.1.1.11_Q93KC0	oligogalacturonide transport system permease protein
togN	K10194		3.A.1.1.11_Q93KB9	oligogalacturonide transport system permease protein
togT	K16210		2.A.2.5.1_Q93KC2	oligogalacturonide transporter
tolQ	K03562		1.A.30.2.2	biopolymer transport protein TolQ
tolR	K03560		1.A.30.2.2	biopolymer transport protein TolR
torA	K07811	1.7.2.3		trimethylamine-N-oxide reductase (cytochrome c) [EC:1.7.2.3]
torC	K03532			trimethylamine-N-oxide reductase (cytochrome c), cytochrome c-type subunit TorC
torD	K03533			TorA specific chaperone
torY	K07821			trimethylamine-N-oxide reductase (cytochrome c), cytochrome c-type subunit TorY
torZ	K07812	1.7.2.3		trimethylamine-N-oxide reductase (cytochrome c) [EC:1.7.2.3]
[truncated: 299 more rows]

## Sheet: ST3.microtrait_hmms_benchmark
microtrait_hmm-name	microtrait_hmm-dbxref_kegg	microtrait_hmm-dbxref_kegg_scorethreshold	microtrait_hmm-dbxref_kegg_fscore	microtrait_hmm-dbxref_kegg_tpr	microtrait_hmm-dbxref_kegg_tnr	microtrait_hmm-dbxref_kegg_fpr	microtrait_hmm-dbxref_kegg_fnr	microtrait_hmm-dbxref_kegg_accuracy
adh	K00001	302	0.170869	0.178179	1	0.000146	0.8218	0.99972
butB	K00004	378.9	0.929235	0.86898	1	1.26e-07	0.13102	1
gldA	K00005	317	0.94574	0.959119	1	1.11e-05	0.040881	0.99998
ldh	K00016	309.6	0.947623	0.906526	1	2.02e-06	0.09347	0.99997
hprA	K00018	323.7	0.989535	0.98041	1	1.26e-07	0.01959	0.999998
phbB	K00023	319	0.974694	0.958266	1	1.26e-06	0.041734	0.999992
mdh	K00024	280.3	0.948512	0.926484	1	1.11e-05	0.073516	0.999959
icd	K00031	377	0.79385	0.66651	1	6.68e-06	0.333493	0.999818
pgd	K00033	160.5	0.998668	0.997604	1	1.26e-07	0.002396	0.999999
gpd	K00036	49.5	1	1	1	0	0	1
uxuB	K00040	430.2	0.79258	0.937002	1	6.75e-05	0.063	0.999923
uxaB	K00041	256.4	0.9933	0.98815	1	1.26e-07	0.01185	1
hbd	K00074	361.6	0.826375	0.749739	1	3.12e-05	0.250261	0.999848
dhaT	K00086	550.5	0.856	0.8737	1	2.01e-06	0.1263	0.999996
bdhAB	K00100	539.9	0.757	0.631	1	3.78e-07	0.369	1
betA	K00108	137.1	0.981398	0.997826	1	1.03e-05	0.002174	0.99999
exaA	K00114	717	0.785455	0.6722	1	2.39e-06	0.3278	1
fdhBF420	K00125	230.2	1	1	1	0	0	1
aldh	K00128	446.8	0.431757	0.932481	0.998	0.00158	0.067519	0.99838
betB	K00130	646.9	0.70621	0.68844	1	4.83e-05	0.31156	0.999894
gapA.NAD+	K00134	63.8	0.945398	1	1	9.34e-05	0	0.999907
proA	K00147	100.5	0.999861	0.999721	1	0	0.000279	1
fdhA	K00148	342.3	0.991753	0.98768	1	2.52e-07	0.01232	1
gapA.NADP+	K00150	238.3	0.98155	0.96377	1	0	0.03623	1
poxB	K00156	682.4	0.969236	0.941572	1	2.52e-07	0.058428	0.999989
ogdh	K00164	84	0.958469	0.999643	1	3.05e-05	0.000357	0.999969
porA	K00169	315.8	0.974288	0.99716	1	4.41e-06	0.00284	1
porB	K00170	196.8	0.915849	0.99695	1	1.49e-05	0.00305	1
porD	K00171	108.6	0.812834	0.87861	1	1.85e-05	0.12139	1
porG	K00172	135.2	0.978659	0.98015	1	1.89e-06	0.01985	1
oforA	K00174	147	0.980829	0.999472	1	9.19e-06	0.000528	0.999991
oforB	K00175	240.5	0.974974	0.975992	1	6.3e-06	0.024008	0.999988
oforD	K00176	69.7	0.80521	0.94444	1	3.64e-05	0.05556	1
oforC	K00177	130.5	0.9553	0.99336	1	8.18e-06	0.00664	1
cdhA	K00192	165.7	0.96861	0.9391	1	0	0.0609	1
cdhC	K00193	491.9	0.959	0.94545	1	3.78e-07	0.05455	1
acsD	K00194	97.4	0.981	1	1	8.81e-07	0	1
cdhB	K00195	113.9	1	1	1	0	0	1
cooF	K00196	148.3	0.859	0.82253	1	3.4e-06	0.17747	1
acsC	K00197	119.9	1	1	1	0	0	1
cooS	K00198	167.2	1	1	1	0	0	1
fwdA	K00200	113.4	1	1	1	0	0	1
fwdB	K00201	108.7	1	1	1	0	0	1
fwdC	K00202	107.5	0.994941	0.98993	1	0	0.01007	1
fwdD	K00203	121	0.969	0.9611	1	5.04e-07	0.03889	1
fwdH	K00204	182	0.958	0.92	1	0	0.08	1
fwdF	K00205	234.7	0.974843	0.95092	1	0	0.04908	1
sdhA	K00239	682	0.934491	0.887201	1	5.67e-06	0.112799	0.999939
sdhB	K00240	203.9	0.898293	0.972786	1	9.47e-05	0.027214	0.99989
sdhC	K00241	41.4	0.897695	0.895115	1	4.35e-05	0.1049	0.999911
sdhD	K00242	59.5	0.982738	0.969216	1	8.82e-07	0.03078	0.99999
frdA	K00244	513.5	0.837409	0.735772	1	4.66e-06	0.26423	0.999938
frdB	K00245	271	0.965725	0.96981	1	4.03e-06	0.03019	0.999993
frdC	K00246	43.4	0.976176	0.9546	1	1.26e-07	0.0454	0.999995
frdD	K00247	51.7	0.999146	1	1	1.26e-07	0	1
bcd	K00248	579.1	0.746556	0.62587	1	2.77e-06	0.37413	1
gudB	K00260	616.4	0.976264	0.95556	1	1.26e-07	0.04444	1
gdhA_1	K00261	334.1	0.78687	0.960336	1	7.93e-05	0.039664	0.999914
gdhA_2	K00262	419.1	0.979219	0.973218	1	4.03e-06	0.026782	0.999989
gltB	K00265	210.9	0.95372	0.982398	1	2.67e-05	0.017602	0.999967
gltD	K00266	499.7	0.96172	0.934522	1	4.03e-06	0.065478	0.999966
gltS1	K00284	2374.3	0.459	0.34247	1	4.15e-06	0.65753	1
proC	K00286	64.4	0.977839	0.998707	1	2.57e-05	0.001293	0.999974
metF	K00297	20.8	0.975104	0.998347	1	2.25e-05	0.00165	0.999977
mtdA	K00300	354.8	1	1	1	0	0	1
dmd-tmd	K00317	596.8	1	1	1	0	0	1
mtd	K00319	96.2	1	1	1	0	0	1
mer	K00320	238.9	0.983	0.96629	1	0	0.03371	1
nuoA	K00330	21.1	0.975989	1	1	1.83e-05	0	0.999982
nuoB	K00331	177.8	0.969211	0.99129	1	2.04e-05	0.00871	0.999976
nuoC	K00332	171.9	0.82664	0.759458	1	2.1e-05	0.240542	0.999914
nuoD	K00333	499.6	0.902804	0.873418	1	1.71e-05	0.126582	0.999948
nuoE	K00334	141.2	0.91129	0.877205	1	1.71e-05	0.1228	0.999939
nuoF	K00335	512.5	0.920836	0.909501	1	2.39e-05	0.0905	0.999943
nuoG	K00336	544.3	0.860614	0.774453	1	8.31e-06	0.22555	0.999918
nuoH	K00337	137.1	0.975319	0.99703	1	1.81e-05	0.002968	0.999981
nuoI	K00338	145.3	0.937345	0.906229	1	1.01e-05	0.093771	0.999955
nuoJ	K00339	39.7	0.967391	0.991989	1	2.13e-05	0.008011	0.999976
nuoK	K00340	60.1	0.960166	0.988988	1	2.52e-05	0.01101	0.999971
nuoL	K00341	432.9	0.957954	0.974171	1	2.15e-05	0.025829	0.999969
nuoM	K00342	324.1	0.916255	0.961414	1	5.33e-05	0.038586	0.999932
nuoN	K00343	314.1	0.953591	0.966026	1	2.2e-05	0.033974	0.999966
nqrA	K00346	131.1	1	1	1	0	0	1
nqrB	K00347	255.5	0.99098	0.98683	1	5.04e-07	0.01317	0.999998
nqrC	K00348	108.2	0.997644	0.99882	1	3.78e-07	0.00118	0.999999
nqrD	K00349	226	0.999399	0.9988	1	0	0.0012	1
nqrE	K00350	253.5	0.99771	0.99543	1	0	0.00457	1
nqrF	K00351	239.2	0.997611	0.99642	1	1.26e-07	0.00358	0.999999
nasB	K00360	465.6	0.664789	0.92913	1	1.38e-05	0.07087	0.999985
nirB	K00362	412	0.967004	0.951927	1	4.91e-06	0.048073	0.999981
nirD	K00363	93.2	0.940408	0.961518	1	1.96e-05	0.038482	0.999971
nirA	K00366	562.8	0.850331	0.75176	1	8.81e-07	0.24824	1
narB	K00367	1061.1	0.945	0.89583	1	0	0.10417	1
nirK	K00368	212.7	0.975923	0.95298	1	0	0.047	1
narG	K00370	320.2	0.983607	0.984556	1	3.4e-06	0.01544	0.999994
narH	K00371	315.4	0.990691	0.99466	1	2.52e-06	0.00534	0.999996
nasA	K00372	916.9	0.907291	0.909747	1	1.33e-05	0.090253	0.99997
narI_dsrM	K00374	37.9	0.985163	1	1	5.67e-06	0	0.999994
nosZ	K00376	172.8	1	1	1	0	0	1
cysJ	K00380	176.6	0.926187	0.970029	1	3.3e-05	0.02997	0.999959
cysI	K00381	495.2	0.982681	0.96849	1	6.3e-07	0.031513	0.99999
pdhD	K00382	425.1	0.914088	0.894081	1	6.35e-05	0.105919	0.99983
asrC	K00385	383.4	1	1	1	0	0	1
sorB	K00386	73.5	0.957	0.9655	1	3.78e-07	0.0345	1
cysH	K00390	105.7	0.955034	0.939951	1	1.03e-05	0.060049	0.999968
sir	K00392	532.7	0.853782	0.75595	1	1.26e-06	0.24405	1
aprA	K00394	302.1	0.997	0.99419	1	0	0.00581	1
aprB	K00395	103.4	0.91	0.95294	1	3.02e-06	0.04706	1
mcrA	K00399	543.9	1	1	1	0	0	1
mcr2	K00400	502.6	1	1	1	0	0	1
mcrB	K00401	265.3	1	1	1	0	0	1
mcrG	K00402	307.4	1	1	1	0	0	1
ccoN	K00404	106.2	0.92816	0.99064	1	2.52e-05	0.00936	0.999973
ccoO	K00405	60.3	0.928367	1	1	2.52e-05	0	0.999975
ccoP	K00406	101.9	0.970461	0.9506	1	1.51e-06	0.0494	0.99999
fbcH	K00410	772.3	0.957	0.9167	1	0	0.0833	1
petB_2	K00412	263.7	0.97256	0.964187	1	3.4e-06	0.035813	0.99999
cydA	K00425	21.3	0.999576	0.999153	1	0	0.000847	0.999999
cydB	K00426	25.7	0.999362	0.999149	1	2.52e-07	0.000851	0.999999
lctP1	K00427	935.2	0.983	0.97222	1	2.52e-07	0.02778	1
crtQ	K00514	499.4	1	1	1	0	0	1
anfG	K00531	60.1	0.961	1	1	7.55e-07	0	1
arsC	K00537	95.1	0.971141	0.95712	1	6.05e-06	0.042882	0.999975
cfa	K00574	118.6	0.996872	0.995142	1	7.56e-07	0.004858	0.999997
tmtrA	K00577	86	0.997	1	1	1.26e-07	0	1
tmtrB	K00578	95.4	1	1	1	0	0	1
tmtrC	K00579	212.8	1	1	1	0	0	1
tmtrD	K00580	290.6	1	1	1	0	0	1
tmtrE	K00581	396.6	1	1	1	0	0	1
tmtrF	K00582	65.1	1	1	1	0	0	1
tmtrG	K00583	81.5	1	1	1	0	0	1
tmtrH	K00584	134	1	1	1	0	0	1
glyA	K00600	60.8	0.99871	0.999815	1	1.64e-06	0.000185	0.999998
tkt	K00615	195.2	0.904382	0.836298	1	1.42e-05	0.163702	0.99981
tal	K00616	119.5	0.970769	0.974195	1	1.88e-05	0.025805	0.999967
pta1	K00625	416.7	0.69383	0.549478	1	7.05e-06	0.450522	0.999901
atoB	K00626	118.8	0.780136	0.878	0.999	0.000504	0.122	0.99933
ptb	K00634	384.2	0.709	0.60154	1	4.66e-06	0.39846	0.999976
pflD	K00656	102.1	0.960407	0.991004	1	2.44e-05	0.008996	0.999973
dlst	K00658	487.9	0.92083	0.879072	1	1.3e-05	0.120928	0.999935
ftr	K00672	299	1	1	1	0	0	1
ggt	K00681	39.6	0.974448	0.999791	1	3.15e-05	0.000209	0.999968
otsA	K00697	47.7	0.953004	1	1	1.99e-05	0	0.99998
malQ	K00705	63.1	0.993939	0.997972	1	3.15e-06	0.00203	1
purF	K00764	149.7	0.998325	0.996893	1	1.26e-07	0.003107	0.999998
lldG	K00782	81	0.990105	0.984261	1	8.82e-07	0.015739	0.999996
aspB	K00812	444.1	0.792079	0.709534	1	3.26e-05	0.290466	0.999852
aspC	K00813	529	0.829077	0.81154	1	1.44e-05	0.18846	1
rocD	K00819	470.3	0.90297	0.823848	1	1.26e-07	0.176152	0.999975
glmS	K00820	146.7	0.98439	0.97101	1	1.26e-06	0.02899	0.999978
agxt	K00830	415.7	0.963939	0.93039	1	0	0.06961	1
glk	K00845	143.7	0.740345	0.968577	1	0.000397	0.031423	0.999584
scrK	K00847	185	0.689708	0.574402	1	4.47e-05	0.426	0.99975
galK	K00849	158	0.991304	0.989493	1	1.89e-06	0.010507	0.999995
pfkA	K00850	338.7	0.770077	0.879029	1	0.000122	0.120971	0.999842
prk	K00855	139.7	0.998435	0.99687	1	0	0.00313	1
cysC	K00860	97.2	0.790958	0.992697	1	0.000116	0.007303	0.999882
dak	K00863	486.7	0.8295	0.75469	1	5.67e-06	0.2453	1
pyk	K00873	31.9	0.99945	0.999267	1	2.52e-07	0.000733	0.999999
fucK	K00879	286	0.982524	0.96565	1	0	0.0344	0.999999
fruK	K00882	308.6	0.874549	0.84814	1	2.63e-05	0.15186	0.99993
pfkC	K00918	206.7	1	1	1	0	0	1
ackA	K00925	118.6	0.954946	0.993965	1	4.4e-05	0.006035	0.999953
pgk	K00927	100.2	0.999892	1	1	1.26e-07	0	1
buk	K00929	222.2	1	1	1	0	0	1
proB	K00931	75.2	0.998354	0.996986	1	1.26e-07	0.003014	1
tdcD	K00932	593.9	0.998	0.9958	1	0	0.0042	1
prs	K00948	55.4	1	1	1	0	0	1
cysNC	K00955	724.3	0.905136	0.83038	1	5.04e-07	0.16962	0.99998
cysN	K00956	509.4	0.79561	0.984095	1	9.31e-05	0.015905	0.9999
cysD	K00957	134.1	0.997972	0.995953	1	0	0.004047	0.999999
sat	K00958	139	0.997211	0.99777	1	3.78e-07	0.00223	0.999999
pnp	K00962	266.3	0.998909	0.99782	1	0	0.00218	1
galT	K00965	40	0.98599	0.97937	1	1.89e-06	0.02063	0.999993
ppdK	K01006	331.6	0.987477	0.975263	1	0	0.024737	0.999995
pps	K01007	299.1	0.908888	0.928595	1	4.43e-05	0.07141	0.999928
sseA	K01011	72.5	0.957134	0.986287	1	3.56e-05	0.013713	0.999958
pct	K01026	695	0.938	0.9	1	8.81e-07	0.1	1
atoD	K01034	300.3	0.939834	0.89881	1	8.81e-07	0.10119	1
atoA	K01035	318.6	0.899	0.88918	1	4.28e-06	0.11082	1
pgl_1	K01057	116.3	0.996216	0.99622	1	1.01e-06	0.003784	0.999998
phoA	K01077	68.7	0.987342	0.983193	1	2.14e-06	0.0168	0.999994
phy	K01083	65.3	0.994138	0.99531	1	3.78e-07	0.00469	1
fbpI-sebp	K01086	593.1	0.925	0.8611	1	0	0.1389	1
otsB	K01087	193	0.948166	0.957327	1	9.7e-06	0.042673	0.999984
appA	K01093	366.2	0.962	0.93162	1	2.52e-07	0.06838	1
phoD	K01113	85.1	0.991597	0.992238	1	1.76e-06	0.00776	0.999997
pepA_M17	K01255	396.3	0.978309	0.96129	1	2.14e-06	0.03871	0.999977
pepN	K01256	34.3	0.980684	0.998761	1	1.55e-05	0.00124	0.999984
pepT	K01258	148.9	0.998561	0.997946	1	2.52e-07	0.002054	0.999999
pip	K01259	157	0.933652	0.94413	1	2.24e-05	0.05587	0.999962
pepA_M42	K01261	419.9	0.986	0.97973	1	2.52e-07	0.02027	1
pepP	K01262	204.3	0.865309	0.917191	1	0.000122	0.08281	0.999829
E3.4.11.14	K01263	884.1	0.981	0.963	1	0	0.037	1
map	K01265	140.3	0.99609	0.9937	1	1.26e-06	0.0063	0.999993
dmpA	K01266	21.3	0.984738	0.98018	1	1.01e-06	0.0198	1
E3.4.11.-	K01269	200.1	0.833	0.714	1	0	0.286	1
pepD_M20	K01270	225.8	0.99309	0.987777	1	2.52e-07	0.012223	0.999998
pepQ	K01271	280.7	0.648463	0.941372	1	0.000182	0.05863	0.999807
E3.4.13.-	K01274	398.7	0.885	0.9787	1	1.38e-06	0.0213	1
pepX	K01281	180.4	1	1	1	0	0	1
dcp	K01284	726	0.989443	0.979813	1	1.26e-07	0.020187	0.999996
E3.4.16.4	K01286	191.7	0.625038	0.50534	1	2.9e-05	0.4947	0.999843
cpg	K01295	233.2	0.99837	0.99675	1	0	0.00325	1
ldcA	K01297	34.7	1	1	1	0	0	1
E3.4.17.19	K01299	70.9	0.99961	1	1	1.26e-07	0	1
pcp	K01304	29.1	1	1	1	0	0	1
iadA	K01305	153.2	0.999	0.99743	1	0	0.00257	1
yqgT	K01308	151	0.998	0.99567	1	0	0.00433	1
sspA	K01318	189.5	0.992	0.984	1	0	0.016	1
E3.4.21.50	K01337	366.1	1	1	1	0	0	1
lon	K01338	216.6	0.944476	0.895765	1	6.3e-07	0.10423	0.99994
E3.4.21.59	K01340	309.1	1	1	1	0	0	1
aprE1	K01342	429	0.759	0.6406	1	7.55e-07	0.35938	1
iga_hap	K01347	714.4	0.9	0.83333	1	2.52e-07	0.16667	1
ptrB	K01354	506	0.990616	0.981406	1	0	0.018594	0.999996
ompT	K01355	380.1	0.944	0.8939	1	0	0.1061	1
lexA	K01356	125.7	0.970837	0.951959	1	4.03e-06	0.048041	0.99997
clpP	K01358	60.9	0.999609	0.999218	1	0	0.000782	0.999999
E3.4.21.96	K01361	826.8	0.944	0.8932	1	0	0.1068	1
speB	K01364	522	1	1	1	0	0	1
pepC	K01372	45.3	0.99874	0.99874	1	1.26e-07	0.00126	1
E3.4.23.42	K01385	94.4	1	1	1	0	0	1
colA	K01387	133.5	0.99748	0.99748	1	1.26e-07	0.00252	1
iga_zmpA	K01390	2408.2	1	1	1	0	0	1
lasB	K01399	557.6	0.5	0.9531	1	1.5e-05	0.0469	1
nprE	K01400	576.2	0.72	0.5677	1	3.78e-07	0.4323	1
aur	K01401	702.8	0.987	0.975	1	0	0.0253	1
prtC_M10	K01406	181.6	0.974	0.98885	1	1.38e-06	0.01115	1
ptrA	K01407	730	1	1	1	0	0	1
ide	K01408	229.1	0.348	0.98246	1	5.26e-05	0.01754	1
prlC	K01414	800.6	0.969292	0.942245	1	3.78e-07	0.057755	0.999988
snpA	K01416	140.7	1	1	1	0	0	1
hslV	K01419	83.6	0.999448	0.998897	1	0	0.001103	1
bepA	K01423	136.7	0.966196	0.941495	1	1.89e-06	0.058505	0.999983
glsA	K01425	35.2	1	1	1	0	0	1
ureC	K01428	63.1	0.99946	1	1	2.52e-07	0	1
ureB	K01429	131.4	0.938862	0.987898	1	2.3e-05	0.012102	0.999975
ureA	K01430	146.5	0.952351	0.944652	1	7.93e-06	0.055348	0.999981
pac	K01434	410.5	0.931918	0.946468	1	1.44e-05	0.053532	0.999977
yhaA	K01436	500.1	0.821844	0.75	1	5.79e-06	0.25	1
dapE	K01439	272.4	0.906348	0.874575	1	2.87e-05	0.125425	0.999906
cbh	K01442	32.2	0.968592	1	1	1.02e-05	0	0.99999
hipO	K01451	482.6	0.973079	0.988	1	4.03e-06	0.012	1
rocF	K01476	176.6	0.969194	0.962353	1	3.78e-06	0.037647	0.99999
folD	K01491	38.5	0.999789	0.999578	1	0	0.000422	1
mtdch	K01499	298.2	1	1	1	0	0	1
fchA	K01500	117	0.961165	0.99	1	4.41e-06	0.01	1
pdc	K01568	555.6	0.311	1	1	3.97e-05	0	1
adc	K01574	80.1	1	1	1	0	0	1
alsD	K01575	49.7	1	1	1	0	0	1
gadAB	K01580	210.9	0.932701	0.930937	1	8.69e-06	0.069063	0.999982
speF	K01581	195.9	0.927218	0.876256	1	2.77e-06	0.1237	1
cadA	K01582	548.8	0.891667	0.89273	1	1.16e-05	0.10727	0.999977
adiA	K01584	908.9	0.912395	0.8389	1	0	0.1611	0.999983
speA	K01585	275	0.97947	0.966667	1	1.39e-06	0.033333	0.999992
ppc	K01595	14	0.985128	0.974118	1	1.13e-06	0.0259	0.999991
pckA1	K01596	131.8	1	1	1	0	0	1
rbcL	K01601	391.3	0.94429	0.92175	1	2.9e-06	0.07825	1
rbcS	K01602	123.9	0.96	0.99359	1	3.02e-06	0.00641	1
pckA2	K01610	66.8	0.999764	0.999528	1	0	0.000472	1
xpk	K01621	49.3	1	1	1	0	0	1
aldo.classI-1	K01623	24.2	1	1	1	0	0	1
aldo.classII	K01624	68.4	0.933005	1	1	8.57e-05	0	0.999914
eda	K01625	181.2	0.971924	0.95328	1	3.4e-06	0.04672	0.999978
fucA	K01628	195.7	0.807027	0.739775	1	2.3e-05	0.260225	0.999913
aceA	K01637	122.8	0.997738	0.995986	1	1.26e-07	0.00401	0.999999
aceB	K01638	49.6	0.980637	0.963229	1	3.78e-07	0.0368	0.999989
citF	K01643	93.6	0.99926	1	1	1.26e-07	0	1
citE	K01644	147.1	0.920284	0.993186	1	6.11e-05	0.006814	0.99994
citD	K01646	56.9	0.996215	1	1	6.3e-07	0	1
gltA	K01647	20.8	0.907211	0.998104	1	0.000134	0.0019	0.999864
aclSlarge	K01652	485.6	0.84905	0.822349	1	0.00013	0.177651	0.99967
aclSsmall_1	K01653	40	0.99397	0.98875	1	3.78e-07	0.01125	0.999994
fumI	K01676	336.5	0.99523	0.9905	1	0	0.009501	0.999997
fumalpha	K01677	293.9	0.926523	0.87627	1	1.13e-06	0.12373	1
fumbeta	K01678	206.3	0.846018	0.83421	1	9.95e-06	0.16579	1
fumII	K01679	600.7	0.980602	0.964133	1	1.01e-06	0.035867	0.999983
acnA	K01681	315.7	0.920103	0.99277	1	7.48e-05	0.00723	0.999922
acnB	K01682	418.3	0.999334	0.99867	1	0	0.001332	1
uxaA	K01685	563.1	0.924692	0.90125	1	6.8e-06	0.09875	0.999979
uxuA	K01686	80.5	0.999642	0.999285	1	0	0.000715	1
eno	K01689	51.1	1	1	1	0	0	1
edd	K01690	420.4	0.997889	0.995787	1	0	0.004213	0.999999
crt	K01715	345.3	0.727955	0.66974	1	1.86e-05	0.33026	0.999945
algL	K01729	38.7	0.86067	0.77707	1	1.13e-06	0.223	1
ocd	K01750	250.9	0.67873	0.90541	1	4.97e-05	0.09459	1
fadJ	K01782	721.7	0.94186	0.891262	1	2.52e-07	0.108738	0.999979
rpe	K01783	58.6	0.966218	0.998338	1	4.13e-05	0.001662	0.999958
galE	K01784	296.5	0.811994	0.718341	1	4.66e-05	0.281659	0.999696
galM	K01785	75.8	0.99742	0.995993	1	5.04e-07	0.004007	1
algG	K01795	189.2	0.992	0.98333	1	0	0.01667	1
tpi	K01803	26	0.986561	0.999794	1	1.65e-05	0.000206	0.99998
rpiA	K01807	65	0.999507	0.999671	1	2.52e-07	0.000329	1
rpiB	K01808	155	0.936865	0.92512	1	1.75e-05	0.074884	0.999956
manA	K01809	31.5	0.97067	0.945133	1	7.56e-07	0.0549	0.999981
pgi	K01810	42.3	0.984916	0.997932	1	1.56e-05	0.00207	0.999983
uxaC	K01812	47.4	1	1	1	0	0	1
fucI	K01818	96.5	1	1	1	0	0	1
fadB	K01825	742.8	0.994521	0.9891	1	0	0.0109	1
gpmA	K01834	194.4	0.855305	0.775403	1	1.71e-05	0.224597	0.999881
mut	K01847	527.2	0.942535	0.891803	1	1.26e-07	0.1082	0.99997
acss	K01895	584.3	0.919287	0.887716	1	3.18e-05	0.11228	0.999887
sucD	K01902	208.4	0.988079	0.996644	1	9.32e-06	0.003356	0.99999
sucC	K01903	266.4	0.985892	0.995767	1	1.08e-05	0.004233	0.999987
glnA	K01915	35.4	0.980615	0.999518	1	4.08e-05	0.000482	0.99996
ftfL	K01938	106.4	0.999144	1	1	3.78e-07	0	1
guaA	K01951	107.1	0.87577	0.779397	1	3.78e-07	0.220603	0.999838
asnB	K01953	100.5	0.987169	0.978863	1	2.65e-06	0.021137	0.999984
pyc	K01958	666.2	0.989091	0.979984	1	2.52e-07	0.020016	0.999997
pycA	K01959	722.9	0.886	0.88021	1	5.16e-06	0.11979	1
pycB	K01960	742.5	0.714964	0.56579	1	1.13e-06	0.43421	0.99997
accC	K01961	654.2	0.93295	0.92325	1	2.85e-05	0.076752	0.999933
accA	K01962	77.4	0.999728	0.999455	1	0	0.000545	1
accD	K01963	161.4	0.999314	0.998902	1	1.26e-07	0.001098	0.999999
pcc6	K01964	1018.6	1	1	1	0	0	1
trpS	K01989	51.8	0.999711	1	1	1.26e-07	0	1
yadG	K01990	246.7	0.529055	0.747	0.996	0.00363	0.25254	0.99553
wza	K01991	60.9	0.958474	0.99933	1	3.24e-05	0.000669	0.999967
yadH	K01992	36.3	0.787	0.835	0.999	0.000902	0.165	0.99858
livG	K01995	296.5	0.847757	0.787867	1	6.84e-05	0.21213	0.999727
livF	K01996	281.4	0.790397	0.819554	1	0.000248	0.180446	0.999576
livH	K01997	144.7	0.921079	0.993632	1	0.000162	0.006368	0.999832
livM	K01998	145.9	0.922219	0.994118	1	0.000156	0.00588	0.999838
livK	K01999	69.5	0.937747	0.995	1	0.000171	0.004522	0.99982
proV	K02000	389.8	0.995415	0.992684	1	5.04e-07	0.007316	0.999997
proW	K02001	212.7	0.996241	0.992948	1	1.26e-07	0.00705	0.999998
proX	K02002	155.8	0.966439	0.942369	1	3.4e-06	0.057631	0.999972
devA	K02003	257.9	0.592642	0.788173	0.998	0.00166	0.211827	0.99794
devC	K02004	52.7	0.808577	0.948838	0.999	0.00078	0.05116	0.99912
devB	K02005	231.9	0.58427	0.648667	1	0.000211	0.351333	0.99966
cbiO	K02006	316.1	0.267211	0.518882	1	0.000394	0.481118	0.999526
cbiM	K02007	28.9	0.998917	0.999277	1	2.52e-07	0.000723	1
cbiQ	K02008	149.1	0.888247	0.803132	1	8.81e-07	0.19687	0.999966
cbiN	K02009	21.7	0.825248	0.759846	1	1.07e-05	0.24	0.999958
afuC	K02010	402	0.394997	0.533504	0.999	0.000518	0.466496	0.999275
afuB	K02011	341.2	0.964608	0.93868	1	3.53e-06	0.06132	0.999968
afuA	K02012	206.3	0.90522	0.868421	1	2.7e-05	0.131579	0.999903
fevA	K02013	251.1	0.549585	0.778	0.998	0.00158	0.222	0.9981
tc.fev	K02014	47.9	0.763762	0.994	0.999	0.00123	0.00604	0.99876
fevP	K02015	54.9	0.966157	0.999	1	0.000135	0.001159	0.99986
fevS	K02016	35.2	0.953024	0.999	1	0.000172	0.001351	0.99983
modC	K02017	356.8	0.628813	0.48621	1	2.09e-05	0.513788	0.999801
modB	K02018	235.8	0.919579	0.867234	1	7.56e-06	0.13277	0.999939
modA	K02020	96.3	0.933351	0.985614	1	5.64e-05	0.014386	0.999937
lamB	K02024	267.8	0.975583	0.95856	1	7.56e-07	0.04144	0.999994
sugP	K02025	260.6	0.697514	0.823508	0.999	0.000548	0.176492	0.99927
sugP1	K02026	253.4	0.699568	0.807555	0.999	0.000513	0.192445	0.99929
sugS1	K02027	227.7	0.675129	0.728551	1	0.000451	0.27145	0.99927
pas	K02028	322.6	0.518386	0.877218	0.999	0.00148	0.122782	0.998404
pap	K02029	207.7	0.690789	0.847	0.999	0.000926	0.15343	0.99884
paa	K02030	112.6	0.60664	0.763	0.999	0.00134	0.23654	0.99824
pstB	K02036	301.2	0.989354	0.981098	1	1.39e-06	0.018902	0.999987
pstC	K02037	214.6	0.991534	0.986652	1	2.02e-06	0.013348	0.99999
pstA	K02038	234.7	0.982065	0.96794	1	1.89e-06	0.03206	0.99998
pstS	K02040	64.5	0.995702	0.992258	1	6.3e-07	0.00774	0.999993
phnC	K02041	335.2	0.76379	0.650636	1	1.21e-05	0.34936	0.999908
phnE	K02042	106.6	0.995673	0.991754	1	1.26e-07	0.00825	0.999997
phnD	K02044	113.3	0.966766	0.937603	1	6.3e-07	0.0624	0.99998
cysA	K02045	392.8	0.98447	0.97	1	1.26e-07	0.03	0.99999
cysU	K02046	272	0.999712	0.999425	1	0	0.000575	1
cysW	K02047	259.5	0.998275	0.996556	1	0	0.003444	0.999999
cysP	K02048	88.6	0.876197	0.999603	1	8.94e-05	0.000397	0.99991
ribP	K02050	134.6	0.757714	0.980498	0.999	0.000538	0.019502	0.999445
ribS	K02051	135.4	0.710531	0.902088	0.999	0.00053	0.097912	0.999388
sugA	K02056	572.3	0.49136	0.590577	0.999	0.000533	0.409423	0.9992
sugP2	K02057	204.3	0.592339	0.859831	0.999	0.00115	0.14017	0.9987
sugS2	K02058	216.1	0.707794	0.726831	1	0.000127	0.27317	0.999767
thiQ	K02062	334	0.733043	0.66856	1	1.73e-05	0.33144	0.999946
thiP	K02063	291.5	0.984841	0.97013	1	0	0.02987	0.999996
thiB	K02064	162.1	1	1	1	0	0	1
mlaF	K02065	303.6	0.461264	0.86943	0.999	0.000891	0.130575	0.999048
mlaE	K02066	28.4	0.999809	0.999809	1	1.26e-07	0.000191	1
mlaD	K02067	84.1	0.963083	0.969641	1	3.91e-05	0.030359	0.999934
metN	K02071	450.4	0.785624	0.75716	1	8.77e-05	0.24284	0.999787
metI	K02072	120.3	0.998275	0.997292	1	3.78e-07	0.002708	0.999998
metQ	K02073	62.9	0.998854	0.99771	1	0	0.00229	0.999998
zmA	K02074	286.3	0.261956	0.22093	1	8.07e-05	0.77907	0.999784
zmP	K02075	262.4	0.750703	0.613115	1	3.9e-06	0.386885	0.999922
zmS	K02077	266.9	0.806254	0.696009	1	6.55e-06	0.303991	0.999928
allC	K02083	469.4	0.913357	0.92	1	9.82e-06	0.08	0.999982
apcA	K02092	284.7	1	1	1	0	0	1
apcB	K02093	236.1	0.995	0.9894	1	0	0.0106	1
apcC	K02094	132.4	1	1	1	0	0	1
apcD	K02095	224.4	0.979	0.9596	1	0	0.0404	1
apcE	K02096	747.9	1	1	1	0	0	1
apcF	K02097	253.5	1	1	1	0	0	1
araE	K02100	625.2	0.939	0.88485	1	0	0.11515	1
atoE	K02106	77.9	0.998808	0.99881	1	1.26e-07	0.00119	1
atpvaGH	K02107	41.2	0.988	0.97667	1	0	0.02333	1
atpB	K02108	51.1	0.999884	0.999769	1	0	0.000231	1
atpF	K02109	38	0.996675	0.993936	1	3.78e-07	0.00606	0.999996
atpE	K02110	50	0.99759	0.996567	1	7.56e-07	0.003433	1
atpA	K02111	345	0.998981	0.998642	1	3.78e-07	0.001358	0.999999
atpD	K02112	280.3	0.997305	0.994625	1	0	0.005375	0.999997
atpH	K02113	28.3	0.993628	0.997345	1	5.29e-06	0.002655	0.999993
atpC	K02114	21.3	1	1	1	0	0	1
atpG	K02115	31	1	1	1	0	0	1
atpvaA	K02117	377.9	1	1	1	0	0	1
atpvaB	K02118	293.9	0.998821	0.99882	1	1.26e-07	0.00118	1
atpvaC	K02119	80.7	1	1	1	0	0	1
atpvaD	K02120	77.3	0.999407	1	1	1.26e-07	0	1
atpvaE	K02121	50.9	0.996078	0.99608	1	3.78e-07	0.00392	1
atpvaF	K02122	30.7	1	1	1	0	0	1
bccP	K02160	96.8	0.952914	0.921108	1	5.79e-06	0.078892	0.999957
betT	K02168	686.4	0.96392	0.939	1	1.76e-06	0.061008	0.99999
blaR1	K02172	309.7	0.928	0.86522	1	0	0.13478	1
ccmA	K02193	229.4	0.497868	0.656055	1	0.000198	0.343945	0.999733
ccmB	K02194	53.7	0.996403	0.994019	1	2.52e-07	0.005981	0.999998
ccmC	K02195	40.1	1	1	1	0	0	1
ccmD	K02196	22.3	0.99834	0.99917	1	3.78e-07	0.000831	0.999999
rocE	K02205	747.3	0.891	0.8289	1	1.39e-06	0.17109	1
comC	K02236	221.6	0.548977	0.42642	1	9.57e-06	0.57358	1
coxA	K02274	652.8	0.871233	0.84416	1	3.78e-05	0.15584	0.999899
coxB	K02275	192	0.903161	0.833333	1	4.91e-06	0.16667	0.999927
coxC	K02276	182.3	0.899786	0.841339	1	9.95e-06	0.158661	0.999935
cpaA	K02278	81.7	0.919873	0.903111	1	8.56e-06	0.096889	0.999978
cpcA	K02284	264	0.991	0.98214	1	0	0.01786	1
cpcB	K02285	284.3	0.991	0.99107	1	1.26e-07	0.00893	1
cpcC	K02286	369.6	0.67808	0.8319	1	9.32e-06	0.1681	1
cpcD	K02287	118.9	0.741	0.6667	1	1.26e-06	0.3333	1
cpcE	K02288	263.2	1	1	1	0	0	1
cpcF	K02289	139.5	1	1	1	0	0	1
cpcG	K02290	270.7	0.833	0.97283	1	8.44e-06	0.02717	1
crtB	K02291	160.7	0.855271	0.888064	1	3.84e-05	0.111936	0.999939
crtP	K02293	528.5	0.957627	0.9187	1	0	0.0813	1
cyoA	K02297	318.5	0.987152	0.980851	1	1.13e-06	0.019149	0.999995
cyoB	K02298	964.3	0.975522	0.95625	1	7.55e-07	0.043754	0.999991
cyoC	K02299	253.7	0.95593	0.919366	1	7.55e-07	0.080634	0.999985
norC	K02305	86.2	0.983	0.96636	1	0	0.0336	1
flgA	K02386	48.4	1	1	1	0	0	1
flgB	K02387	62.6	0.995568	0.99317	1	6.3e-07	0.006833	0.999997
flgC	K02388	87.6	0.989633	0.979479	1	0	0.020521	0.999993
flgD	K02389	37.2	0.997807	0.99721	1	5.04e-07	0.00279	0.999999
flgE	K02390	292.7	0.952344	0.910688	1	6.3e-07	0.089312	0.999969
flgF	K02391	210.5	0.962204	0.949431	1	4.78e-06	0.050569	0.999985
flgG	K02392	228.3	0.900194	0.878836	1	2.93e-05	0.121164	0.999922
flgH	K02393	38.6	1	1	1	0	0	1
flgI	K02394	48.6	1	1	1	0	0	1
flgK	K02396	86.9	0.999401	0.999201	1	1.26e-07	0.000799	1
flgL	K02397	147.3	0.954931	0.917189	1	1.13e-06	0.082811	0.999974
flgM	K02398	24.7	1	1	1	0	0	1
flgN	K02399	35.5	0.999073	0.99815	1	0	0.001852	1
flhA	K02400	704.8	0.941881	0.893859	1	1.39e-06	0.106141	0.999963
flhB	K02401	348.5	0.959485	0.95769	1	1.17e-05	0.042306	0.999975
flhC	K02402	30.6	1	1	1	0	0	1
flhD	K02403	19.6	0.99867	1	1	2.52e-07	0	1
fliA	K02405	165.8	0.980625	0.962819	1	2.52e-07	0.037181	0.999989
fliC	K02406	140.5	0.979331	0.959936	1	2.52e-07	0.040064	0.999978
fliD	K02407	76.4	0.999777	0.999554	1	0	0.000446	1
fliE	K02408	29.9	1	1	1	0	0	1
fliF	K02409	117.8	0.97601	0.95352	1	1.26e-07	0.04648	0.999985
fliG	K02410	42.1	0.999601	0.999203	1	0	0.000797	1
fliH	K02411	38.9	0.906876	0.993543	1	5.78e-05	0.006457	0.99994
fliI	K02412	478.1	0.857194	0.944857	1	8.36e-05	0.055143	0.999899
fliK	K02414	45.7	0.977419	0.98569	1	6.04e-06	0.01431	0.999991
fliM	K02416	95.3	0.976114	0.956558	1	1.01e-06	0.043442	0.999986
fliN	K02417	38.8	0.948654	0.941658	1	1.67e-05	0.05834	0.999961
fliO	K02418	21.6	0.992566	0.998206	1	2.77e-06	0.001794	1
fliP	K02419	236.3	0.990075	0.990276	1	3.15e-06	0.009724	0.999994
fliQ	K02420	88.7	0.949969	0.911611	1	2.39e-06	0.088389	0.99997
fliR	K02421	162.7	0.971006	0.97562	1	1.03e-05	0.02438	0.999982
tcyA	K02424	275.5	0.941939	0.929366	1	9.95e-06	0.07063	0.999974
glucP	K02429	91.9	0.997938	0.997253	1	2.52e-07	0.00275	0.999999
glpF	K02440	160.1	0.994076	0.988929	1	2.52e-07	0.011071	0.999996
hpt	K02445	513.9	0.899767	0.81919	1	2.52e-07	0.180815	0.999973
#N/A	K02446	442.8	0.917314	0.865054	1	4.16e-06	0.134946	0.999969
gspO	K02464	319.7	0.545	0.49296	1	8.44e-06	0.50704	1
hofD	K02506	173.1	0.844	0.72996	1	0	0.27	1
kdgT	K02526	74.8	0.99921	1	1	1.26e-07	0	1
lacY	K02532	160.9	0.996094	0.99222	1	0	0.00778	1
mecR1	K02547	244.9	0.974	0.949	1	0	0.0513	1
motA	K02556	64.2	0.998766	0.997535	1	0	0.002465	0.999999
motB	K02557	143.4	0.949066	0.925211	1	1.25e-05	0.074789	0.99995
napA	K02567	652.1	0.994839	0.991	1	1.26e-07	0.009	0.999999
napB	K02568	21.2	0.998656	0.99866	1	1.26e-07	0.00134	1
nifD	K02586	439.6	0.95	0.9596	1	5.29e-06	0.0404	1
nifH	K02588	359.4	0.96224	0.9585	1	3.27e-06	0.0415	1
nifK	K02591	398.9	0.9512	0.96648	1	5.92e-06	0.03352	1
nirC	K02598	237.4	0.993976	0.98802	1	0	0.01198	1
pdaD	K02626	56.6	0.998833	0.99767	1	0	0.00233	1
pecA	K02628	320.8	1	1	1	0	0	1
pecB	K02629	348.3	1	1	1	0	0	1
pecC	K02630	493.7	0.957	1	1	1.26e-07	0	1
pecE	K02631	445.7	1	1	1	0	0	1
pecF	K02632	221.6	1	1	1	0	0	1
petA	K02634	384.3	1	1	1	0	0	1
petB	K02635	244.9	0.913	0.8406	1	0	0.15942	1
petC	K02636	122.7	0.921	0.87137	1	6.3e-07	0.12863	1
petD	K02637	108.5	1	1	1	0	0	1
petE	K02638	99.3	0.989	0.9785	1	0	0.0215	1
petF	K02639	106.5	0.989967	0.98013	1	0	0.01987	0.999999
petG	K02640	68.2	1	1	1	0	0	1
petH	K02641	305.9	0.949	0.90323	1	0	0.09677	1
petL	K02642	32	1	1	1	0	0	1
petM	K02643	42	1	1	1	0	0	1
pilD	K02654	65.9	0.783487	0.910626	1	0.000127	0.089374	0.999846
ppdA	K02679	84.2	0.981481	0.97921	1	8.81e-07	0.02079	1
ppdB	K02680	90.6	0.993435	0.98911	1	1.26e-07	0.01089	1
ppdC	K02681	55.4	1	1	1	0	0	1
ppdD	K02682	159.6	0.984091	0.97523	1	3.78e-07	0.02477	1
psaA	K02689	1394.1	1	1	1	0	0	1
psaB	K02690	1373	0.996	0.9917	1	0	0.00833	1
psaC	K02691	94.5	0.995	0.99	1	0	0.01	1
psaD	K02692	120.8	1	1	1	0	0	1
psaE	K02693	90.1	1	1	1	0	0	1
psaF	K02694	167.1	1	1	1	0	0	1
psaI	K02696	42.3	1	1	1	0	0	1
psaJ	K02697	53.4	1	1	1	0	0	1
psaK	K02698	57.9	1	1	1	0	0	1
psaL	K02699	191.2	0.941	0.9115	1	3.78e-07	0.0885	1
psaM	K02700	38	1	1	1	0	0	1
psaX	K02702	39.3	1	1	1	0	0	1
psbA	K02703	353.5	1	1	1	0	0	1
psbB	K02704	327.8	1	1	1	0	0	1
psbC	K02705	419.2	1	1	1	0	0	1
psbD	K02706	325.5	1	1	1	0	0	1
psbE	K02707	55.5	0.995	0.9899	1	0	0.0101	1
psbF	K02708	55.3	1	1	1	0	0	1
psbH	K02709	56.5	1	1	1	0	0	1
psbI	K02710	60.3	1	1	1	0	0	1
psbJ	K02711	48.7	1	1	1	0	0	1
psbK	K02712	71.8	1	1	1	0	0	1
psbL	K02713	70.9	1	1	1	0	0	1
psbM	K02714	58.5	0.988	0.9759	1	0	0.0241	1
psbN	K02715	63.6	1	1	1	0	0	1
psbO	K02716	158.1	1	1	1	0	0	1
psbP	K02717	88.7	1	1	1	0	0	1
psbT	K02718	50.2	1	1	1	0	0	1
psbU	K02719	111	1	1	1	0	0	1
psbV	K02720	134.7	1	1	1	0	0	1
psbX	K02722	48.9	1	1	1	0	0	1
psbY	K02723	20.6	0.962	0.9565	1	3.78e-07	0.0435	1
psbZ	K02724	64.3	1	1	1	0	0	1
agaEIIA	K02744	131.3	0.864111	0.7686	1	6.3e-07	0.2314	1
agaEIIB	K02745	213.8	0.965	0.94643	1	7.55e-07	0.05357	1
agaEIIC	K02746	282.1	0.991	0.982	1	0	0.01828	1
agaEIID	K02747	327.5	0.98	0.96658	1	2.52e-07	0.03342	1
glvEIIB	K02749	577.1	0.964218	0.936	1	3.78e-07	0.06399	1
glvEIIC	K02750	572.4	0.97757	0.95788	1	1.26e-07	0.04212	1
ascEIIB	K02752	553.8	0.991	0.9831	1	0	0.01695	1
ascEIIC	K02753	802.7	0.989	0.9788	1	0	0.02119	1
bglEIIA	K02755	107.1	0.481089	0.7231	1	0.000284	0.2769	0.999655
bglEIIB	K02756	611.4	0.90234	0.83778	1	4.16e-06	0.162225	0.999961
bglEIIC	K02757	594.3	0.903581	0.85466	1	8.06e-06	0.145339	0.99996
celEIIA	K02759	34.7	0.943971	1	1	3.56e-05	0	1
celEIIB	K02760	57.4	0.99452	0.993068	1	1.39e-06	0.006932	0.999996
celEIIC	K02761	53.2	0.961153	1	1	3.56e-05	0	0.999964
dglEIIA	K02763	796.6	0.973	0.947	1	0	0.0526	1
dglEIIB	K02764	796.6	0.973	0.947	1	0	0.0526	1
dglEIIC	K02765	876.2	0.081	1	1	4.86e-05	0	1
fru1EIIA	K02768	129.5	0.681613	0.564607	1	3.72e-05	0.4354	0.999787
fru1EIIB	K02769	28.8	0.87008	0.978044	1	0.000102	0.022	0.999889
fru1EIIC	K02770	276.5	0.91314	0.985344	1	6.39e-05	0.014656	0.999931
levG	K02771	396.1	0.967	0.9355	1	0	0.0645	1
gatEIIA	K02773	107.6	0.85883	0.89686	1	2.15e-05	0.10314	0.999967
gatEIIB	K02774	68.8	0.926119	0.99664	1	1.75e-05	0.00336	0.999982
gatEIIC	K02775	448.2	0.940043	0.90984	1	3.15e-06	0.09016	0.999986
glc1EIIA	K02777	189.1	0.718967	0.674115	1	4.08e-05	0.3259	0.999893
glc1EIIB	K02778	92.5	0.82164	0.7087	1	1.64e-06	0.2913	1
glc1EIIC	K02779	670.7	0.805263	0.675	1	1.26e-07	0.325	1
gutEIIA	K02781	48.9	1	1	1	0	0	1
gutEIIB	K02782	169.8	0.995595	0.99123	1	0	0.00877	1
gutEIIC	K02783	143.2	0.996451	0.992927	1	0	0.00707	0.999999
ptsH	K02784	118.8	0.936648	0.9527	1	6.3e-06	0.04731	1
lacEIIA	K02786	134.5	0.993	0.98577	1	0	0.01423	1
lacEIIB	K02787	447.6	0.995	0.98947	1	0	0.01053	1
lacEIIC	K02788	388.6	0.995	0.98947	1	0	0.01053	1
malglcEIIB	K02790	632.8	0.871357	0.82172	1	6.04e-06	0.17828	1
malglcEIIC	K02791	626.5	0.886269	0.85428	1	6.93e-06	0.14572	1
manEIIA	K02793	112.6	0.872087	0.851404	1	2.63e-05	0.1486	0.99994
manEIIB	K02794	46.6	0.776481	0.9746	1	0.000122	0.02543	0.999872
manEIIC	K02795	240.2	0.850442	0.822144	1	2.38e-05	0.17786	0.999938
manEIID	K02796	287.5	0.814748	0.878474	1	5.41e-05	0.12153	0.999922
mtlEIIA	K02798	140.1	0.728042	0.872358	1	7.81e-05	0.1276	0.999903
mtlEIIB	K02799	45.6	0.98813	0.97653	1	0	0.0235	1
mtlEIIC	K02800	90.7	0.997473	0.996633	1	2.52e-07	0.00337	1
nagEIIA	K02802	123.3	0.30927	0.76782	1	0.000198	0.2322	1
nagEIIB	K02803	69.7	0.50729	0.875258	1	0.000288	0.12474	0.999689
nagEIIC	K02804	635.2	0.876552	0.827016	1	1.1e-05	0.172984	0.999957
ntrEIIA	K02806	144.6	0.807091	0.68647	1	4.16e-06	0.313525	0.999907
scrEIIA	K02808	696.9	0.907	0.92533	1	5.41e-06	0.07467	1
scrEIIB	K02809	459.9	0.882353	0.94352	1	3.83e-05	0.05648	0.999951
scrEIIC	K02810	576.8	0.818271	0.798589	1	3.01e-05	0.201411	0.99993
sorEIIA	K02812	163.2	0.991	0.98165	1	0	0.01835	1
sorEIIB	K02813	261.4	0.991	0.9821	1	0	0.01786	1
sorEIIC	K02814	445.7	0.987	0.975	1	0	0.025	1
sorEIID	K02815	476.9	1	1	1	0	0	1
treEIIA	K02817	933.1	0.95	0.90441	1	0	0.09559	1
treEIIB	K02818	570.4	0.974115	0.9495	1	0	0.05046	0.999994
treEIIC	K02819	581.9	0.968153	0.93827	1	0	0.06173	0.999992
ulaEIIA	K02821	79.6	0.850944	0.86089	1	3.59e-05	0.13911	0.999933
ulaEIIB	K02822	61.3	0.98435	0.9808	1	2.52e-06	0.0192	0.99999
uraA	K02824	411.5	0.991669	0.98404	1	1.26e-07	0.01596	0.999996
qoxA	K02826	382.1	0.914	0.84675	1	2.52e-07	0.1532	1
qoxB	K02827	978.4	0.926764	0.86352	1	0	0.13648	1
qoxC	K02828	281.1	0.935	0.87755	1	0	0.12245	1
rhaT2	K02856	61.9	0.998767	0.99754	1	0	0.00246	1
lepB	K03100	63.5	0.994064	0.98938	1	1.01e-06	0.010619	0.99999
lspA	K03101	23.6	0.99979	1	1	2.52e-07	0	1
thiJ	K03152	151.1	0.965489	0.93932	1	1.01e-06	0.06068	0.99999
ompA	K03162	72	1	1	1	0	0	1
wcaI	K03208	177.6	0.993	0.99437	1	3.78e-07	0.00563	1
mscL	K03282	28.9	0.998932	0.997866	1	0	0.00213	0.999999
corA	K03284	159.7	0.969353	0.952266	1	7.18e-06	0.047734	0.999965
hgdD	K03287	351.3	0.889	0.8	1	0	0.2	1
citA	K03288	677.3	0.991	0.98123	1	0	0.01877	0.999999
nupG	K03289	673.2	0.98	0.9607	1	0	0.0393	1
mfs.set	K03291	112.1	0.997944	1	1	3.78e-07	0	1
tc.gph	K03292	366.6	0.878853	0.857973	1	2.25e-05	0.14203	0.999944
tc.aat	K03293	596.9	0.6028	0.47206	1	2.76e-05	0.52794	0.999818
tc.apa	K03294	284.8	0.948823	0.921779	1	1.05e-05	0.078221	0.999951
TC.HAE1	K03296	1070.4	0.305346	0.662545	1	0.000464	0.337455	0.999478
mmr	K03297	100.6	0.899381	0.928098	1	3.61e-05	0.0719	0.999945
TC.DME	K03298	164.1	0.88525	0.7941	1	0	0.2059	1
TC.GNTP	K03299	69.7	0.795306	0.998772	1	0.000158	0.001228	0.999842
tc.citmhs	K03300	105.6	0.97561	0.999057	1	6.55e-06	0.000943	0.999993
lctP2	K03303	49	0.916684	1	1	5.02e-05	0	0.99995
tehA	K03304	178.8	0.99514	0.99033	1	0	0.00967	1
tc.pot	K03305	65.7	0.998221	0.998084	1	7.56e-07	0.001916	1
tc.sss	K03307	300.8	0.700551	0.875036	1	0.000274	0.124964	0.999671
tc.nss	K03308	69	0.999821	1	1	1.26e-07	0	1
tc.agcs	K03310	36.2	0.987891	1	1	1.32e-05	0	0.999987
tc.livcs	K03311	66.8	0.999799	0.999597	1	0	0.000403	1
nhaA	K03313	33.6	1	1	1	0	0	1
nhaB	K03314	200.4	1	1	1	0	0	1
nhaC	K03315	120.7	0.990246	0.998643	1	3.4e-06	0.001357	0.999996
tc.cnt	K03317	414.7	0.837061	0.79878	1	2.27e-05	0.20122	0.999936
tutB	K03318	759.6	0.875	1	1	2.52e-07	0	1
tc.dass	K03319	506.5	0.96204	0.92977	1	3.78e-07	0.07023	0.99999
amt	K03320	38.7	0.99767	0.999788	1	2.65e-06	0.000212	0.999997
tc.sulp	K03321	355.6	0.975804	0.959744	1	3.91e-06	0.040256	0.999975
mntH	K03322	59.4	1	1	1	0	0	1
yjbB	K03324	158.1	0.99414	0.988349	1	0	0.01165	0.999997
arsB2	K03325	67.7	0.996465	0.993492	1	1.26e-07	0.00651	0.999998
dcuC	K03326	81.6	1	1	1	0	0	1
yahN	K03329	279.9	0.993333	0.9868	1	0	0.01325	1
nrfA	K03385	40.3	1	1	1	0	0	1
ahpC_1	K03386	199.2	0.871805	0.941255	1	0.000123	0.058745	0.999843
ahpF	K03387	406.4	0.981942	0.96517	1	1.26e-07	0.03483	0.999993
hdrA2	K03388	509.6	0.89522	0.8239	1	1.01e-06	0.1761	0.99999
hdrB2	K03389	149.6	0.815642	0.95425	1	2.23e-05	0.04575	1
hdrC2	K03390	99.6	0.953737	0.9781	1	3.78e-06	0.0219	1
bchH	K03403	1048.9	0.99469	0.99645	1	2.52e-07	0.00355	1
mcrC	K03421	262.7	1	1	1	0	0	1
mcrD	K03422	80	1	1	1	0	0	1
bchM	K03428	149.1	1	1	1	0	0	1
psmA	K03432	129.6	0.990506	0.98894	1	6.3e-07	0.01106	1
psmB	K03433	118.8	0.988704	0.992	1	1.39e-06	0.008	1
mscS	K03442	196.4	0.621549	0.931883	1	0.000284	0.068117	0.999698
nepI	K03445	332.4	0.964	0.9309	1	0	0.06912	1
emrY	K03446	333.2	0.972948	0.972645	1	1.08e-05	0.027355	0.999978
mfs.cp	K03449	112.8	0.996943	0.993905	1	0	0.006095	0.999998
tc.ncs1	K03457	195.1	0.94384	0.98218	1	2.38e-05	0.01782	0.99997
tc.ncs2	K03458	555.7	0.48028	0.5201	1	3.24e-05	0.4799	1
focB	K03459	477.1	0.954	0.912	1	0	0.0877	1
aaeB	K03468	48.1	1	1	1	0	0	1
ulaEIIC	K03475	37.9	0.999723	0.999446	1	0	0.000554	1
trkH	K03498	50.3	0.999858	1	1	1.26e-07	0	1
trkA	K03499	135.2	0.966787	0.954375	1	1.27e-05	0.045625	0.999958
umuD	K03503	102.7	0.956252	0.937026	1	3.78e-06	0.062974	0.999986
bioY	K03523	45.4	0.999218	0.999609	1	3.78e-07	0.000391	0.999999
torC	K03532	415.4	0.867235	0.76559	1	0	0.23441	1
emrK	K03543	268.1	0.969534	0.966027	1	1.07e-05	0.033973	1
clpX	K03544	273.9	0.996403	0.992832	1	0	0.007168	0.999996
kup	K03549	53.2	1	1	1	0	0	1
exbD	K03559	24.2	0.82394	0.99959	1	0.000262	0.00041	0.999738
tolR	K03560	140.8	0.7662	0.841751	1	9.31e-05	0.158249	0.999866
exbB	K03561	50.1	0.82182	0.996677	1	0.00026	0.00332	0.999738
tolQ	K03562	217.6	0.947529	0.905962	1	1.64e-06	0.094038	0.99997
tldD	K03568	277.8	0.994505	0.989418	1	1.26e-07	0.01058	0.999996
pmbA	K03592	282.3	0.962338	0.930905	1	1.13e-06	0.069095	0.999978
hyaD	K03605	100.8	0.945749	0.935897	1	6.8e-06	0.0641	0.999983
wcaJ	K03606	317.5	0.923664	0.97091	1	1.65e-05	0.02909	0.99998
rnfG	K03612	94.6	0.987952	0.98754	1	1.76e-06	0.012458	0.999996
rnfE	K03613	214.9	0.962343	0.93193	1	7.55e-07	0.06807	0.999989
rnfD	K03614	269.5	0.974507	0.957189	1	1.13e-06	0.042811	0.999992
rnfC	K03615	110.2	0.998304	0.996613	1	0	0.00339	0.999999
rnfB	K03616	87.5	0.973621	0.975962	1	6.04e-06	0.024038	0.999989
rnfA	K03617	223.6	0.962526	0.94074	1	2.14e-06	0.059259	0.999989
lptE	K03643	22.1	0.998529	0.998823	1	3.78e-07	0.00118	0.999999
hslU	K03667	273.6	0.999631	0.999262	1	0	0.000738	1
dnaJ	K03686	309.8	0.945933	0.906267	1	6.8e-06	0.093733	0.999929
grpE	K03687	32.8	0.999677	0.999785	1	2.52e-07	0.000215	1
petN	K03689	47.8	1	1	1	0	0	1
clpA	K03694	879	0.968494	0.945708	1	1.76e-06	0.054292	0.999985
clpB	K03695	1140.3	0.972952	0.953819	1	3.4e-06	0.046181	0.999974
clpC	K03696	1113.5	0.87892	0.79519	1	4.79e-06	0.20481	0.999927
clpE	K03697	980.1	0.976017	0.95316	1	0	0.04684	1
cspA	K03704	25.5	0.999099	0.999	1	7.57e-07	0.001309	1
hrcA	K03705	59.2	1	1	1	0	0	1
por	K03737	282	0.998847	0.997696	1	0	0.002304	1
dltB	K03739	223.5	0.995938	0.99191	1	0	0.00809	1
arsC2	K03741	119.8	0.91225	0.901675	1	2.2e-05	0.09833	0.999949
potE	K03756	425.3	1	1	1	0	0	1
cadB	K03757	606.8	0.998	0.9963	1	0	0.00375	1
arcD	K03758	315.3	0.990649	0.984321	1	6.3e-07	0.015679	0.999996
adiC	K03759	526.4	0.98	0.964	1	1.26e-07	0.03629	1
kgtP	K03761	432.4	0.95974	0.956634	1	7.18e-06	0.043366	0.999984
proP	K03762	446.2	0.898044	0.824598	1	3.53e-06	0.175402	0.999944
katE	K03781	17.2	0.999532	0.999766	1	3.78e-07	0.000234	0.999999
katG	K03782	110.7	1	1	1	0	0	1
aphA	K03788	101.3	1	1	1	0	0	1
prc	K03797	103.4	0.994734	0.99156	1	1.26e-06	0.00844	0.999994
hflB	K03798	637.4	0.983343	0.973433	1	4.41e-06	0.026567	0.999977
htpX	K03799	110.3	0.988754	0.980555	1	1.26e-06	0.019445	0.99999
wcaF	K03818	148.3	0.991968	0.98603	1	1.26e-07	0.01397	1
wcaB	K03819	162.4	0.998	1	1	1.26e-07	0	1
phbC	K03821	89.2	0.992672	0.987108	1	3.78e-07	0.01289	0.999997
tyrP	K03834	354.5	0.947315	0.925075	1	3.53e-06	0.074925	0.999987
mtr	K03835	530	0.978723	0.95833	1	0	0.04167	1
tnaB	K03836	648.5	0.995	0.989	1	0	0.0106	1
sdaC	K03837	523	0.955791	0.915326	1	0	0.084674	0.999987
tdcC	K03838	738.9	1	1	1	0	0	1
fbpI	K03841	51.2	0.990909	1	1	4.53e-06	0	0.999995
petB_1	K03887	290.4	0.985	0.96996	1	0	0.03004	1
qcrA	K03890	172	1	1	1	0	0	1
qcrB	K03891	455	0.98855	0.97736	1	0	0.02264	1
arsB1	K03893	80.6	0.996615	0.995267	1	3.78e-07	0.00473	0.999999
mxaR	K03924	104.2	0.997672	0.995698	1	2.52e-07	0.004302	0.999997
pspA	K03969	36.3	0.982274	1	1	8.18e-06	0	0.999992
pspB	K03970	33	0.998361	0.99836	1	1.26e-07	0.00164	1
pspD	K03971	50.9	1	1	1	0	0	1
pspC	K03973	50.6	1	1	1	0	0	1
eutK	K04025	220.8	0.995	0.989	1	0	0.01093	1
eutL	K04026	257.1	1	1	1	0	0	1
eutM	K04027	121.5	0.895	0.98457	1	8.81e-06	0.01543	1
eutN	K04028	52.6	0.92759	0.99789	1	9.19e-06	0.00211	1
eutS	K04031	87.7	1	1	1	0	0	1
bchE	K04034	295.3	1	1	1	0	0	1
chlE	K04035	318.9	1	1	1	0	0	1
bchJ	K04036	173.6	1	1	1	0	0	1
chlL	K04037	399.8	1	1	1	0	0	1
bchG	K04040	257.6	0.984	0.96903	1	0	0.03097	1
fbpIII	K04041	252.2	1	1	1	0	0	1
dnaK	K04043	710.8	0.976996	0.955027	1	0	0.044973	0.999971
adhE	K04072	623.8	0.979905	0.960602	1	0	0.039398	0.999993
lonB	K04076	549	0.959385	0.92194	1	0	0.07806	1
groEL	K04077	197.1	0.99856	0.997123	1	0	0.002877	1
groES	K04078	27.3	0.9999	0.9998	1	0	0.0002	1
clpL	K04086	1141.8	0.993056	0.98621	1	0	0.01379	1
hflC	K04087	183.4	0.999009	0.99851	1	1.26e-07	0.00149	0.999999
hflK	K04088	129.2	0.99845	0.99845	1	3.78e-07	0.00155	0.999999
mtaB	K04480	631.9	1	1	1	0	0	1
norB	K04561	106.3	0.998841	0.99769	1	0	0.00231	1
sodA	K04564	43.5	0.999239	0.998858	1	2.52e-07	0.001142	0.999999
hhoB	K04691	439.2	0.779035	0.8175	1	2.83e-05	0.1825	0.999953
lptD	K04744	82.2	0.996402	0.994732	1	5.04e-07	0.005268	0.999998
mlaA	K04754	49.6	1	1	1	0	0	1
oxyR	K04761	258.1	0.99111	0.983586	1	3.78e-07	0.016414	0.999995
lonH	K04770	429.9	0.996212	0.99245	1	0	0.00755	1
degP	K04771	353	0.827888	0.901521	1	0.000135	0.098479	0.999817
degQ	K04772	510.7	0.72446	0.88302	1	5.55e-05	0.11698	0.9999
sppA	K04773	188.9	0.990622	0.987639	1	2.52e-06	0.012361	0.999993
sohB	K04774	261.9	0.997356	0.99473	1	0	0.00527	0.999999
ydgD	K04775	99.3	0.99749	0.99499	1	0	0.00501	1
betL	K05020	645	0.923445	0.88128	1	2.27e-06	0.11872	1
PIGM	K05284	26.3	0.5	1	1	2.52e-07	0	1
fdh.NADP+A	K05299	980.6	0.694	0.5319	1	0	0.4681	1
sorA	K05301	789	0.333	0.2	1	0	0.8	1
glcU	K05340	260.8	0.924231	0.86517	1	6.3e-07	0.13483	1
treS1	K05343	459.6	0.969644	0.94511	1	6.3e-07	0.054889	0.999991
cpeA	K05376	253	1	1	1	0	0	1
cpeB	K05377	229	0.983	0.9661	1	0	0.0339	1
cpeC	K05378	337.2	0.456	0.7069	1	1.02e-05	0.2931	1
cpeD	K05379	524.8	0.556	0.4	1	1.26e-07	0.6	1
cpeE	K05380	327.6	0.325	0.9286	1	6.67e-06	0.0714	1
cpeR	K05381	126.4	1	1	1	0	0	1
cpeS	K05382	153	1	1	1	0	0	1
cpeT	K05383	61.8	1	1	1	0	0	1
cpeU	K05384	331.4	1	1	1	0	0	1
cpeY	K05385	223.5	1	1	1	0	0	1
cpeZ	K05386	208.3	0.974	0.9487	1	0	0.0513	1
tsx	K05517	99.3	1	1	1	0	0	1
pfpI	K05520	140.7	0.983178	0.973419	1	2.52e-06	0.02658	0.999988
hchA	K05523	90.6	0.998	0.9967	1	0	0.00326	1
phaA	K05559	1114.2	0.991119	0.98239	1	0	0.01761	1
phaC	K05560	145.2	0.997361	0.99474	1	0	0.00526	1
phaD	K05561	519.8	0.99911	0.99822	1	0	0.00178	1
phaE	K05562	151.4	0.996503	0.99303	1	0	0.00697	1
phaF	K05563	97.6	0.991197	0.98255	1	0	0.01745	1
phaG	K05564	109.6	0.994728	0.98951	1	0	0.01049	1
mnhA	K05565	861.8	0.836601	0.76115	1	7.43e-06	0.23885	0.999962
mnhB	K05566	30.9	0.703858	0.9933	1	0.000125	0.0067	0.99987
mnhC	K05567	51.9	0.835853	0.988708	1	7.57e-05	0.01129	0.999922
mnhD	K05568	380.4	0.810811	0.773346	1	3.48e-05	0.226654	0.999907
mnhE	K05569	18.7	0.831806	0.983429	1	7.53e-05	0.01657	0.999921
mnhF	K05570	23.3	0.84222	0.999351	1	7.25e-05	0.000649	0.999927
mnhG	K05571	28	0.845677	0.999363	1	7.2e-05	0.000637	0.999928
ndhA	K05572	609.1	1	1	1	0	0	1
ndhB	K05573	548.3	1	1	1	0	0	1
ndhC	K05574	172	0.99	0.98	1	0	0.02	1
ndhD	K05575	551.2	0.986	0.97158	1	0	0.02842	1
ndhE	K05576	127.4	0.758	0.73034	1	4.41e-06	0.26966	1
ndhF	K05577	406.1	0.854328	0.906	1	1.81e-05	0.09403	1
ndhG	K05578	244.7	0.966	0.94286	1	1.26e-07	0.05714	1
ndhH	K05579	744.3	1	1	1	0	0	1
ndhI	K05580	137.4	0.98	0.96774	1	1.26e-07	0.03226	1
ndhJ	K05581	248.7	1	1	1	0	0	1
ndhK	K05582	384.9	0.991	0.98165	1	0	0.01835	1
ndhL	K05583	56.8	1	1	1	0	0	1
ndhM	K05584	173.8	1	1	1	0	0	1
ndhN	K05585	181.9	1	1	1	0	0	1
hoxE	K05586	217.3	0.985	0.971	1	0	0.029	1
hoxF_1	K05587	821.6	0.964	0.9429	1	1.26e-07	0.0571	1
hoxU_1	K05588	362.8	0.993	0.9859	1	0	0.0141	1
deaD	K05592	540.7	0.953557	0.925007	1	6.67e-06	0.074993	0.99996
marC	K05595	50.8	1	1	1	0	0	1
epi	K05606	120.2	0.945767	0.91265	1	2.9e-06	0.087349	0.999982
macB	K05685	437.1	0.985831	0.972881	1	1.26e-07	0.02712	0.999996
tupA	K05772	69.3	1	1	1	0	0	1
tupB	K05773	146.1	0.999078	0.99816	1	0	0.00184	1
modF	K05776	276	0.990431	0.98728	1	5.04e-07	0.01272	1
vb1xS	K05777	416.9	0.973	0.95304	1	2.52e-07	0.04696	1
vb1xP	K05778	313.2	0.996	0.99138	1	0	0.00862	1
vb1xA	K05779	261.1	0.973	0.95493	1	3.78e-07	0.04507	1
benE	K05782	52.1	1	1	1	0	0	1
ugpB	K05813	314.8	0.965559	0.936121	1	6.3e-07	0.063879	0.999986
ugpA	K05814	307.6	0.909652	0.924765	1	2.18e-05	0.075235	0.999963
ugpE	K05815	303.7	0.910105	0.853538	1	4.53e-06	0.146462	0.999966
ugpC	K05816	507.3	0.678864	0.53653	1	7.3e-06	0.46347	0.999916
mhpT	K05819	365.6	0.994746	0.99301	1	1.26e-07	0.00699	1
hcaT	K05820	163.5	0.996001	0.993474	1	2.52e-07	0.006526	0.999999
dapL	K05823	379.5	0.974253	0.95171	1	1.26e-07	0.04829	1
trpP	K05832	84	0.998829	0.99844	1	1.26e-07	0.00156	1
trpA	K05833	266.4	0.971586	0.946195	1	2.52e-07	0.053805	0.999991
rhtB	K05834	139.6	0.99868	0.99735	1	0	0.00265	1
rhtC	K05835	177.8	1	1	1	0	0	1
opuC	K05845	79.1	0.994855	0.991667	1	7.56e-07	0.00833	0.999996
opuBD	K05846	167.7	0.971446	0.958773	1	9.57e-06	0.041227	0.999964
opuA	K05847	354.2	0.925702	0.896077	1	1.46e-05	0.103923	0.999947
hydB_4	K05922	786.6	0.997	0.99497	1	0	0.00503	1
crs	K05942	324.1	0.99	0.9899	1	2.52e-07	0.0101	1
mngA	K05947	395.5	1	1	1	0	0	1
phaZ	K05973	39.2	0.99479	0.9911	1	1.26e-07	0.0089	1
E3.4.11.10	K05994	160.7	0.992	0.98913	1	1.26e-07	0.01087	1
pepE	K05995	89.4	0.99033	0.98184	1	1.26e-07	0.01816	0.999998
cpt	K05996	130.4	0.989	0.9891	1	1.26e-07	0.0109	1
E3.4.21.100	K05998	762.3	0.964	0.93056	1	0	0.0694	1
E3.4.21.101	K05999	770.3	0.891	0.8448	1	3.78e-07	0.1552	1
cpxP	K06006	61.2	0.99321	0.9865	1	0	0.01349	1
boNT	K06011	939.1	1	1	1	0	0	1
gpr	K06012	156.4	1	1	1	0	0	1
btuC	K06073	364.2	0.988318	0.97917	1	1.26e-07	0.02083	1
btuD	K06074	249.9	0.979911	0.9843	1	1.39e-06	0.0157	1
fadL	K06076	48.6	0.99975	0.999499	1	0	0.000501	1
dhaB	K06120	1102.8	1	1	1	0	0	1
dhaC	K06121	335.5	0.955	0.913	1	0	0.087	1
dhbE	K06122	236.7	1	1	1	0	0	1
gntT	K06155	633.8	0.890625	0.826	1	1.51e-06	0.17391	1
gntU	K06156	529.2	0.995	0.99464	1	2.52e-07	0.00536	1
idnT	K06157	737.6	0.995475	0.991	1	0	0.00901	1
yojI	K06159	574.5	0.97417	0.9565	1	3.78e-07	0.04348	1
pvdE	K06160	567	0.887515	0.83488	1	2.52e-06	0.16512	1
syrD	K06161	1087.5	1	1	1	0	0	1
focA	K06212	340	0.954186	0.91239	1	0	0.08761	1
mgtE	K06213	96.1	0.998611	0.998149	1	3.78e-07	0.001851	0.999999
rbsU	K06216	299.1	0.996	0.99145	1	0	0.00855	1
relE	K06218	38.9	0.978535	0.971583	1	2.64e-06	0.02842	0.999992
tasA	K06336	55.8	1	1	1	0	0	1
spoIIGA	K06383	91.4	1	1	1	0	0	1
spoIVB	K06399	123.9	0.997	0.99483	1	0	0.00517	1
spoIVFB	K06402	92.9	1	1	1	0	0	1
crtL1	K06443	137.4	0.983173	1	1	1.76e-06	0	1
iolF	K06610	278.3	0.996	0.9912	1	0	0.00881	1
tupC	K06857	245.4	0.044644	0.58238	0.998	0.00161	0.41762	0.998
btuF	K06858	302.6	0.860283	0.90579	1	1.52e-05	0.09421	1
pgi_arch	K06859	69.2	1	1	1	0	0	1
lptB	K06861	318	0.9868	0.98187	1	2.77e-06	0.01813	0.99999
yfhM	K06894	92.8	1	1	1	0	0	1
lysE	K06895	90.2	0.983308	0.967577	1	1.26e-07	0.032423	0.99999
pbuG	K06901	71.7	0.984486	0.970211	1	5.04e-07	0.0298	0.99998
preP	K06972	364.2	0.997921	0.99585	1	0	0.00415	1
amzA	K06974	59.5	1	1	1	0	0	1
mmpL10	K06994	317.1	0.913309	0.950042	1	5.82e-05	0.049958	0.99992
K07010	K07010	84.5	0.951374	0.98901	1	2.58e-05	0.010989	0.999971
mngB	K07026	102.4	0.97643	1	1	2.64e-06	0	1
satP	K07034	36	0.999493	0.99899	1	0	0.00101	1
yuiF	K07084	78.3	1	1	1	0	0	1
mleP	K07088	75.7	0.86711	0.991795	1	0.000182	0.008205	0.999813
lptF	K07091	192.6	0.922414	0.895397	1	1.52e-05	0.104603	0.99995
mlaB	K07122	59.2	0.968484	0.94357	1	7.56e-07	0.05643	0.999991
mazF	K07171	21.8	0.949893	0.98919	1	3.16e-05	0.01081	0.999965
mazE	K07172	50.9	0.813701	0.86501	1	1.85e-05	0.13499	1
ylbL	K07177	102.4	1	1	1	0	0	1
oprO_P	K07221	68.1	1	1	1	0	0	1
efeO	K07224	53.4	0.980186	1	1	4.28e-06	0	0.999996
ftrA	K07230	30.6	1	1	1	0	0	1
dsrE	K07235	61.3	0.99037	0.99188	1	1.38e-06	0.00812	0.999998
dsrF	K07236	53.9	0.981502	0.97514	1	1.38e-06	0.02486	0.999996
dsrH	K07237	34.9	0.994226	0.9897	1	1.26e-07	0.01034	1
chrA	K07240	27.1	0.999726	0.999452	1	0	0.000548	1
nixA	K07241	27.6	0.99945	1	1	1.26e-07	0	1
dacC	K07258	218.5	0.903559	0.965936	1	0.00012	0.034064	0.999857
dacB	K07259	81.4	0.99896	0.999168	1	3.78e-07	0.000832	0.999999
vanY	K07260	53.4	0.972112	0.995918	1	8.19e-06	0.00408	0.999991
mepA	K07261	41.4	1	1	1	0	0	1
pbpG	K07262	207.3	0.997761	0.996422	1	1.26e-07	0.003578	0.999999
pqqL	K07263	215.8	0.957767	0.927568	1	3.27e-06	0.07243	0.999971
oprB	K07267	109	0.988299	0.97861	1	2.52e-07	0.02139	0.999997
srtA	K07284	71.3	0.994759	0.990982	1	3.78e-07	0.009018	0.999997
chaA	K07300	99.9	0.998542	0.997089	1	0	0.002911	0.999999
yrbG	K07301	109.9	0.961234	0.926104	1	2.52e-07	0.073896	0.999977
dmsA	K07306	587.6	0.790123	0.9697	1	4.23e-05	0.0303	1
dmsB	K07307	177.8	0.947309	0.98701	1	1.03e-05	0.01299	0.999988
dmsC	K07308	115.3	0.86209	0.99571	1	2.77e-05	0.00429	1
mlaC	K07323	31.9	0.99973	1	1	1.26e-07	0	1
pepO	K07386	74.1	0.985165	1	1	6.8e-06	0	0.999993
loiP	K07387	124.4	0.999328	0.99866	1	0	0.00134	1
pgl_2	K07404	100	0.998102	0.996967	1	1.26e-07	0.003033	0.999999
phaZ2	K07518	297.9	1	1	1	0	0	1
bica	K07552	292.7	0.951098	0.932651	1	1.51e-05	0.067349	0.999949
phoQ	K07637	245.1	0.9986	0.9972	1	0	0.0028	1
cpxA	K07640	388.9	0.979558	0.95994	1	0	0.04006	1
baeS	K07642	361	0.959569	0.93316	1	1.13e-06	0.06684	0.999992
arcB	K07648	556.9	0.995409	0.99086	1	0	0.00914	1
resE	K07651	537.2	0.988764	0.9802	1	1.26e-07	0.0198	1
prrB	K07655	440.3	0.992	0.9923	1	1.26e-07	0.00769	1
phoP	K07660	297.5	0.949728	0.9078	1	3.78e-07	0.09221	1
cpxR	K07662	292.6	0.922759	0.89558	1	4.28e-06	0.10442	0.999986
baeR	K07664	277.1	0.98966	0.97953	1	0	0.02047	1
prrA	K07671	343.9	0.953069	0.92308	1	2.52e-07	0.07692	0.999998
devS	K07682	204.5	1	1	1	0	0	1
nreB	K07683	236.9	0.971	0.951	1	1.26e-07	0.0493	1
desR	K07693	215.4	0.969697	0.96552	1	3.02e-06	0.03448	0.999993
devR	K07695	235.4	0.968	0.9684	1	3.78e-07	0.0316	0.999999
pepB	K07751	362.7	0.997523	0.99506	1	0	0.00494	1
arcA	K07773	281.7	0.991438	0.98302	1	0	0.01698	1
resD	K07775	309.6	0.968714	0.94144	1	1.26e-07	0.05856	1
desK	K07778	180.9	0.992103	0.98529	1	1.26e-07	0.01471	0.999998
uhpC	K07783	465.9	0.983544	0.96762	1	0	0.03238	0.999997
cusA	K07787	1155.4	0.979132	0.959117	1	0	0.040883	0.999994
mdtB	K07788	1501.3	0.989572	0.97936	1	0	0.02064	0.999997
mdtC	K07789	1467	0.910053	0.84562	1	1.64e-06	0.154376	0.999979
dcuA	K07791	575.2	0.916816	0.84828	1	2.52e-07	0.15172	0.999982
dcuB	K07792	587.2	0.955764	0.9165	1	1.26e-07	0.08355	1
tctA	K07793	81.4	0.999698	1	1	1.26e-07	0	1
tctB	K07794	54.9	0.997812	0.99912	1	5.04e-07	0.000876	0.999999
tctC	K07795	69.7	1	1	1	0	0	1
cusC	K07796	608.4	0.995	0.9898	1	0	0.0102	1
torA	K07811	1240.3	0.975	0.95122	1	0	0.04878	1
torZ	K07812	1182.8	0.792929	0.66667	1	8.81e-07	0.33333	1
agrB	K07813	26.8	1	1	1	0	0	1
torY	K07821	523.3	0.982	0.9655	1	0	0.03448	1
sstT	K07862	181.5	0.997638	0.995287	1	0	0.004713	0.999999
flaK	K07991	56.8	0.967	0.9392	1	1.26e-07	0.0608	1
E3.4.24.21	K08076	374.1	1	1	1	0	0	1
hxlA	K08093	183.7	0.871324	0.90805	1	1.16e-05	0.09195	1
galP	K08137	691.4	0.898065	0.8169	1	1.26e-07	0.1831	1
xylE	K08138	557.8	0.969	0.945	1	1.26e-07	0.05505	1
hxt	K08139	474.6	0.957	0.9167	1	0	0.0833	1
araJ	K08156	432.8	0.997	0.9947	1	0	0.00535	1
sotB	K08159	283.5	0.980198	0.98835	1	2.14e-06	0.0116	1
glcT1	K08174	325.4	0.996	0.99219	1	0	0.00781	1
PHO84	K08176	390.4	0.96	0.9231	1	0	0.0769	1
oxlT	K08177	127.4	0.996324	0.99358	1	1.26e-07	0.006416	0.999999
ampG	K08218	214.2	0.99213	0.984384	1	0	0.01562	0.999996
yqgE	K08222	84.1	1	1	1	0	0	1
ynfM	K08224	131.6	0.997361	0.99474	1	0	0.005263	0.999999
entS	K08225	194.4	0.996	0.9912	1	0	0.00882	1
lplT	K08227	159	0.997	0.99747	1	1.26e-07	0.00253	1
sspB2	K08258	435.8	0.977	0.9552	1	0	0.0448	1
lytM	K08259	201.5	0.985	0.9697	1	0	0.0303	1
eco	K08276	32.1	1	1	1	0	0	1
prtC_U32	K08303	54.5	0.947241	0.996538	1	5.87e-05	0.00346	0.999939
hycI	K08315	107	0.991071	0.982	1	0	0.0177	1
ypdF	K08326	470.4	0.98	0.96	1	0	0.04	1
phsA	K08352	560.4	0.982	0.98047	1	5.04e-07	0.01953	1
phsB	K08353	315.4	1	1	1	0	0	1
phsC	K08354	103.5	1	1	1	0	0	1
ttrA	K08357	260	0.994	0.9872	1	0	0.01282	1
ttrB_dsrO	K08358	258.9	0.987	0.97458	1	0	0.02542	1
ttrC	K08359	178.1	0.993	0.98636	1	0	0.01364	1
merT	K08363	52.1	0.990991	0.98214	1	0	0.01786	1
merP	K08364	123.6	0.347044	0.27893	1	2e-05	0.72107	1
ydjE	K08369	339.8	0.965499	0.946492	1	3.53e-06	0.053508	0.999983
pepD_S1	K08372	392.9	0.92683	0.87692	1	1.39e-06	0.12308	0.99999
pgtE	K08477	559.6	0.991	0.981	1	0	0.0185	1
ptsI	K08483	559	0.87628	0.915043	1	8.07e-05	0.084957	0.99988
ptsP	K08484	650	0.989746	0.9806	1	1.26e-07	0.019435	0.999997
ptsO	K08485	109.3	0.932088	0.95645	1	6.93e-06	0.0436	1
pla	K08566	431	0.543	0.6769	1	6.67e-06	0.3231	1
tpr	K08586	924.2	1	1	1	0	0	1
cloSI	K08587	876.3	1	1	1	0	0	1
rgpA_B	K08589	697.7	1	1	1	0	0	1
yopJ	K08598	44.1	0.995	1	1	1.26e-07	0	1
yopT	K08599	279.1	0.921	0.8529	1	0	0.1471	1
srtB	K08600	52.2	0.999	1	1	1.26e-07	0	1
pepF	K08602	78.2	0.99976	1	1	1.26e-07	0	1
npr	K08603	546.6	0.00704	1	1	3.55e-05	0	1
hap	K08604	479.9	0.857	0.94186	1	5.54e-06	0.05814	1
gelE	K08605	1202.7	1	1	1	0	0	1
E3.4.17.14	K08640	221.7	0.905	0.8378	1	1.26e-07	0.1622	1
vanX	K08641	44.6	0.989057	0.981621	1	5.04e-07	0.018379	0.999997
lasA	K08642	111.7	0.961	0.98	1	7.55e-07	0.02	1
zmpB_M26	K08643	1831.2	0.933	0.875	1	0	0.125	1
tetX	K08644	655.7	0.571	1	1	3.78e-07	0	1
lef	K08645	1665.6	1	1	1	0	0	1
E3.4.21.66	K08651	393	0.822	0.7184	1	3.78e-07	0.28155	1
scpA	K08652	1209.1	0.961	0.9245	1	0	0.0755	1
pepDA	K08659	91.3	1	1	1	0	0	1
tri	K08676	228.6	0.996236	0.9925	1	0	0.0075	1
K08677	K08677	391.7	0.975	0.95067	1	0	0.04933	1
mcl	K08691	433.7	0.975	0.95722	1	1.26e-07	0.04278	1
mtkB	K08692	520.8	0.985	0.9851	1	1.26e-07	0.0149	1
ccmK	K08696	181.5	0.878689	0.8645	1	2.01e-06	0.13548	1
ccmL	K08697	106.3	0.993	0.9863	1	0	0.0137	1
ccmM	K08698	109.4	0.989	1	1	2.52e-07	0	1
ccmN	K08699	155.6	1	1	1	0	0	1
ccmO	K08700	351.1	1	1	1	0	0	1
lctB	K08713	97.5	1	1	1	0	0	1
utp	K08717	80	0.998926	1	1	1.26e-07	0	1
nprB	K08777	649.2	0.961	0.9481	1	2.52e-07	0.0519	1
psb27	K08902	105	1	1	1	0	0	1
psb28	K08903	88.7	1	1	1	0	0	1
psb28-2	K08904	137.9	0.988	0.9756	1	0	0.0244	1
petJ	K08906	106.3	0.93	0.88119	1	3.78e-07	0.11881	1
pcbA	K08918	673.8	0.933	0.875	1	0	0.125	1
pcbB	K08919	746.6	1	1	1	0	0	1
pcbC	K08920	732	1	1	1	0	0	1
pcbD	K08921	646.2	0.846	0.7333	1	0	0.2667	1
pcbE	K08922	791.7	1	1	1	0	0	1
pcbF	K08923	594.9	1	1	1	0	0	1
pcbG	K08924	629.4	0.0645	1	1	3.65e-06	0	1
pcbH	K08925	667.1	1	1	1	0	0	1
pufA	K08926	58.2	0.966	0.93333	1	0	0.06667	1
pufB	K08927	59.8	0.984	0.96774	1	0	0.03226	1
pufL	K08928	341.7	1	1	1	0	0	1
pufM	K08929	399.6	1	1	1	0	0	1
pucA	K08930	60.5	0.966	0.9474	1	1.26e-07	0.0526	1
pucB	K08939	78.7	1	1	1	0	0	1
pscA	K08940	425.5	1	1	1	0	0	1
pscB	K08941	178.7	1	1	1	0	0	1
pscC	K08942	144.7	1	1	1	0	0	1
pscD	K08943	188.6	1	1	1	0	0	1
fmoA	K08944	555.9	1	1	1	0	0	1
csmA	K08945	121.3	1	1	1	0	0	1
csmB	K08946	70.9	1	1	1	0	0	1
csmC	K08947	194.7	1	1	1	0	0	1
csmD	K08948	158.7	1	1	1	0	0	1
csmE	K08949	151.6	1	1	1	0	0	1
csmF	K08950	82.7	1	1	1	0	0	1
csmH	K08951	164.6	1	1	1	0	0	1
csmI	K08952	195.3	1	1	1	0	0	1
csmJ	K08953	341.8	1	1	1	0	0	1
csmX	K08954	281	1	1	1	0	0	1
rcnA	K08970	118.1	1	1	1	0	0	1
cruF	K08977	162.4	0.884	0.8837	1	6.29e-07	0.1163	1
rutG	K09016	347.5	0.99	0.98953	1	2.52e-07	0.01047	0.999999
puuD	K09473	314.1	0.969	0.9659	1	6.3e-07	0.03409	1
phoN	K09474	90.4	0.995272	0.99763	1	3.78e-07	0.00237	1
citT	K09477	791.6	0.961	0.9249	1	0	0.0751	1
ina	K09607	174.6	0.992	0.98477	1	0	0.01523	1
iap	K09612	146.9	1	1	1	0	0	1
kpsM	K09688	135.6	0.99514	0.99225	1	1.26e-07	0.00775	0.999999
kpsT	K09689	190.5	0.972015	0.96125	1	1.13e-06	0.03875	1
lpseP	K09690	202.5	0.767571	0.7483	1	3.74e-05	0.251696	0.999916
lpseA	K09691	374.4	0.719934	0.612903	1	1.61e-05	0.387097	0.99991
tagG	K09692	193.4	0.894654	0.84547	1	3.78e-06	0.15453	1
tagH	K09693	358.2	0.876061	0.78899	1	1.01e-06	0.21101	1
nodJ	K09694	163.1	0.999021	0.99804	1	0	0.00196	1
nodI	K09695	444.9	0.651054	0.64501	1	1.83e-05	0.35499	1
natB	K09696	201.4	0.994	0.99441	1	2.52e-07	0.00559	1
natA	K09697	285.1	0.324	0.94708	1	0.000177	0.05292	1
meh	K09709	45.4	0.876087	0.97108	1	1.28e-05	0.02892	1
lptA	K09774	56.4	0.998338	0.998575	1	5.04e-07	0.001425	0.999999
lolC_E	K09808	247.7	0.94088	0.928086	1	2.15e-05	0.071914	0.999944
lolD	K09810	307	0.741083	0.643352	1	3.21e-05	0.356648	0.999845
hrtB	K09813	368.5	1	1	1	0	0	1
hrtA	K09814	351.2	0.994	0.9882	1	0	0.0118	1
znuA	K09815	230.1	0.865677	0.80689	1	2.24e-05	0.193112	0.999902
znuB	K09816	250.8	0.889544	0.817853	1	7.3e-06	0.182147	0.999929
znuC	K09817	307.3	0.375451	0.358361	1	0.000191	0.641639	0.999586
mnS	K09818	399.6	0.795	0.66	1	0	0.34	1
mnP	K09819	347.6	0.64	0.67708	1	1.06e-05	0.32292	1
mnA	K09820	321.9	0.639	0.57143	1	4.78e-06	0.42857	0.999986
perR	K09825	156.8	0.772938	0.638103	1	2.14e-06	0.361897	0.999938
crtC	K09844	50.9	1	1	1	0	0	1
crtD	K09845	609.5	1	1	1	0	0	1
crtF	K09846	373.8	0.994	0.9877	1	0	0.0123	1
crtA	K09847	320.3	1	1	1	0	0	1
crtU	K09879	165.6	0.997	0.99479	1	0	0.00521	1
mtfA	K09933	60.8	0.999541	0.999083	1	0	0.000917	1
tc.bat2	K09936	31.6	0.999567	0.999135	1	0	0.000865	1
aapJ	K09969	163.3	0.993191	0.994037	1	1.13e-06	0.005963	0.999998
aapQ	K09970	245.1	0.988649	0.99203	1	1.64e-06	0.00797	0.999997
aapM	K09971	296	0.983051	0.98083	1	1.64e-06	0.0192	0.999996
aapP	K09972	418	0.879319	0.880569	1	1.62e-05	0.119431	0.999968
artJ	K09996	368	0.714754	0.559	1	3.78e-07	0.44103	1
artI	K09997	383.6	0.861439	0.7566	1	0	0.2434	1
artM	K09998	254.4	0.997015	0.99405	1	0	0.00595	1
artQ1	K09999	254.1	0.991045	0.98225	1	0	0.01775	1
artP1	K10000	336.3	0.997009	0.994	1	0	0.00596	1
gltI	K10001	228.4	0.991977	0.98408	1	0	0.015919	0.999997
gltK	K10002	243.8	0.990111	0.9977	1	1.89e-06	0.00234	0.999998
gltJ	K10003	244.4	0.988777	0.99524	1	1.89e-06	0.00476	0.999998
gltL	K10004	401.3	0.961411	0.98309	1	6.93e-06	0.01691	0.999991
gluB	K10005	295.3	0.948498	0.90389	1	1.26e-07	0.09611	1
gluC	K10006	233.4	0.973162	0.98349	1	2.01e-06	0.01651	1
gluD	K10007	268.4	0.982699	1	1	1.89e-06	0	1
gluA	K10008	419.2	0.993007	0.98611	1	0	0.01389	1
tcyB	K10009	260.4	0.97353	0.958658	1	2.27e-06	0.041342	0.99999
tcyC	K10010	373	0.73525	0.610581	1	7.3e-06	0.389419	0.999936
argT	K10013	392.1	0.788171	0.72716	1	1.17e-05	0.27284	1
hisJ	K10014	374.8	0.704261	0.85281	1	4.72e-05	0.14719	0.999941
hisM	K10015	283.3	0.99198	0.9841	1	0	0.01592	1
hisQ	K10016	317.8	0.987325	0.98535	1	1.01e-06	0.01465	1
hisP	K10017	461.8	0.9492	0.90451	1	1.26e-07	0.09549	1
occT	K10018	288.2	0.968	0.9559	1	5.04e-07	0.0441	1
occM	K10019	311.7	0.944	0.89447	1	0	0.10553	1
occQ	K10020	277.8	0.95	0.933	1	7.55e-07	0.06701	1
occP	K10021	452.4	0.813	0.68452	1	0	0.31548	1
aotJ	K10022	333.8	0.957	0.93231	1	6.3e-07	0.06769	1
aotM	K10023	311	0.954	0.9224	1	3.78e-07	0.07755	1
aotQ	K10024	331.9	0.942	0.9148	1	7.55e-07	0.0852	1
aotP	K10025	458.4	0.892	0.81223	1	2.52e-07	0.18777	1
crtI	K10027	438.5	0.888309	0.95297	1	2.17e-05	0.04703	0.999973
glnH	K10036	377	0.864553	0.824	1	5.67e-06	0.17582	1
glnP	K10037	281.3	0.977169	0.97985	1	1.76e-06	0.02015	1
glnQ	K10038	387.9	0.966535	0.93881	1	2.52e-07	0.06119	1
peb1A	K10039	264.6	0.980392	0.98619	1	1.64e-06	0.01381	1
peb1B	K10040	239	0.955981	0.96046	1	5.92e-06	0.03954	0.999989
peb1C	K10041	407.9	0.88734	0.80421	1	5.04e-07	0.19579	1
cbiK	K10094	132.5	1	1	1	0	0	1
kpsE	K10107	156.8	0.999149	1	1	1.26e-07	0	1
malE	K10108	356.7	0.993525	0.98713	1	0	0.01287	1
malF	K10109	427.4	0.955193	0.91423	1	0	0.08577	1
malG	K10110	247.3	0.99419	0.99612	1	5.04e-07	0.00388	1
malK	K10111	507.5	0.84776	0.868637	1	4.16e-05	0.131363	0.99993
msmX	K10112	409.9	0.699809	0.92121	1	0.00048	0.07879	0.999467
msmE2	K10117	243.2	0.884556	0.897732	1	3.74e-05	0.102268	0.999934
msmF2	K10118	305.6	0.7089	0.685516	1	6.31e-05	0.314484	0.999857
msmG2	K10119	281.1	0.830517	0.815918	1	3.84e-05	0.184082	0.999914
msmE1	K10120	471.1	1	1	1	0	0	1
msmF1	K10121	413.9	1	1	1	0	0	1
msmG1	K10122	334.5	1	1	1	0	0	1
bglH	K10124	322.9	0.997	0.9946	1	0	0.00538	1
lacE	K10188	319.3	0.987	0.97357	1	0	0.02643	1
lacF	K10189	358.5	0.986	0.9722	1	0	0.02778	1
lacG	K10190	313.1	0.988	0.98605	1	2.52e-07	0.014	1
lacK	K10191	550.1	0.858	0.75543	1	1.26e-07	0.24457	1
togB	K10192	314.1	0.989	0.98206	1	1.26e-07	0.01794	1
togM	K10193	406.2	0.988	0.9755	1	0	0.0245	1
togN	K10194	397.3	0.998	0.99512	1	0	0.00488	1
togA	K10195	604.1	0.985	0.9709	1	0	0.02907	1
glcS	K10196	472.7	1	1	1	0	0	1
glcP	K10197	309.4	0.987	0.974	1	0	0.0256	1
glcP1	K10198	327	1	1	1	0	0	1
glcA	K10199	527.5	0.972	0.946	1	0	0.0541	1
ngcE	K10200	224.2	0.988	0.98246	1	1.26e-07	0.01754	1
ngcF	K10201	309	0.978	0.95652	1	0	0.04348	1
ngcG	K10202	302.2	0.966	0.97159	1	8.81e-07	0.02841	1
crtM	K10208	420.4	1	1	1	0	0	1
crtN	K10209	889.5	1	1	1	0	0	1
mtlE	K10227	340.2	0.994854	0.99315	1	2.52e-07	0.00685	1
mtlF	K10228	272.2	0.998158	0.99632	1	0	0.00368	1
mtlG	K10229	275.6	0.99631	0.99265	1	0	0.00735	1
aglE	K10232	233.5	0.994	0.99433	1	2.52e-07	0.00567	1
aglF	K10233	331.4	0.998	1	1	1.26e-07	0	1
aglG	K10234	259.8	0.986	0.97492	1	1.26e-07	0.02508	1
aglK	K10235	540	0.992	0.99153	1	1.26e-07	0.00847	1
thuE	K10236	472.6	0.996	0.99138	1	0	0.00862	1
thuF	K10237	386.8	0.984	0.9693	1	0	0.0307	1
thuG	K10238	370	0.98	0.973	1	3.78e-07	0.02703	0.999999
cebE	K10240	340.2	0.997	0.99675	1	1.26e-07	0.00325	1
cebF	K10241	344.8	0.977	0.96417	1	3.78e-07	0.03583	1
cebG	K10242	329.9	0.989	0.9873	1	3.78e-07	0.0127	1
desA	K10255	212.6	0.995905	0.99184	1	0	0.00816	1
rbsB	K10439	198.7	0.713873	0.827903	1	0.000323	0.172097	0.999564
rbsC	K10440	308.5	0.59665	0.635831	1	0.00032	0.364169	0.999445
rbsA	K10441	613.7	0.656528	0.65837	1	0.000179	0.34163	0.999645
hao	K10535	427.6	0.983	1	1	1.26e-07	0	1
araF	K10537	452.4	0.96707	0.93624	1	0	0.06376	0.999995
araH	K10538	353.8	0.961373	0.92562	1	0	0.07438	1
araG	K10539	662.3	0.993031	0.9862	1	0	0.01384	1
mglB	K10540	261.2	0.974208	0.95108	1	1.26e-07	0.04892	1
mglC	K10541	304	0.986523	0.99097	1	1.26e-06	0.00903	1
mglA	K10542	731.2	0.986072	0.97431	1	1.26e-07	0.02569	1
xylF	K10543	328.3	0.976945	0.962157	1	1.01e-06	0.03784	0.999994
xylH	K10544	403.6	0.953239	0.91857	1	1.01e-06	0.08143	0.99999
xylG	K10545	616.4	0.688321	0.52587	1	2.52e-07	0.47413	0.999943
gguS	K10546	322.2	0.977211	0.95886	1	2.52e-07	0.04114	1
gguP	K10547	432.8	0.97657	0.96303	1	6.3e-07	0.03697	1
gguA	K10548	743.9	0.976077	0.96226	1	6.3e-07	0.03774	1
alsB	K10549	352.7	0.982	0.965	1	0	0.0349	1
alsC	K10550	443	0.993	0.9863	1	0	0.0137	1
alsA	K10551	681.7	0.987	0.9747	1	0	0.0253	1
frcB	K10552	358.3	0.998	0.99548	1	0	0.00452	1
frcC	K10553	396.2	0.998	0.99537	1	0	0.00463	1
frcA	K10554	358.4	0.964	0.95763	1	8.81e-07	0.04237	1
rhaS	K10559	326.3	0.977	0.97735	1	8.81e-07	0.02265	1
rhaP	K10560	323.4	0.959	0.96786	1	1.76e-06	0.03214	1
rhaQ	K10561	307.4	0.967	0.98246	1	1.76e-06	0.01754	1
rhaT1	K10562	701.2	0.928	0.8678	1	1.26e-07	0.1322	1
fae	K10713	224.2	0.96	0.92233	1	0	0.07767	1
mtdB	K10714	256.9	1	1	1	0	0	1
mthK	K10716	59.5	0.963625	0.966001	1	1.89e-05	0.034	0.999965
oppF1	K10823	435.8	0.348568	0.76844	0.999	0.000875	0.23156	0.999049
nikE	K10824	295.5	0.105217	0.88861	0.999	0.000763	0.11139	0.999
fhuC	K10829	151	4.36e-05	1	0.994	0.00577	0	0.994
tauB	K10831	329.3	0.915938	0.93416	1	9.7e-06	0.06584	1
pmoA-amoA	K10944	125	1	1	1	0	0	1
pmoB-amoB	K10945	32	1	1	1	0	0	1
pmoC-amoC	K10946	90.6	1	1	1	0	0	1
bchP	K10960	228.8	0.998	0.99519	1	0	0.00481	1
tcpJ	K10966	447.9	1	1	1	0	0	1
codB	K10974	218.2	0.98671	0.97824	1	5.04e-07	0.02176	1
allP	K10975	545.3	0.99	0.9795	1	0	0.02055	1
gamEIIB	K10984	229.5	0.96	0.9223	1	0	0.0777	1
gamEIIC	K10985	331.3	1	1	1	0	0	1
gamEIID	K10986	369.3	1	1	1	0	0	1
attC	K11077	304.8	0.959	0.9206	1	0	0.0794	1
attB	K11078	352.8	1	1	1	0	0	1
attA2	K11079	369.4	0.932	0.8732	1	0	0.1268	1
attA1	K11080	485	0.679	0.5143	1	0	0.486	1
phnS	K11081	449.5	0.998	0.99609	1	0	0.00391	1
phnV	K11082	307.5	0.988	0.97581	1	0	0.0242	1
phnU	K11083	340.2	1	1	1	0	0	1
phnT	K11084	474.8	1	1	1	0	0	1
msbA	K11085	676.1	0.75521	0.731645	1	7.07e-05	0.268355	0.999837
gltP	K11102	519.7	0.978123	0.96268	1	7.56e-07	0.037321	0.999994
dctA	K11103	481.9	0.982409	0.966696	1	3.78e-07	0.033304	0.99999
melB	K11104	399.8	0.981	0.96789	1	1.26e-07	0.03211	1
ttdT	K11106	661.4	0.969	0.9395	1	0	0.06048	1
dsrA	K11180	294.4	1	1	1	0	0	1
dsrB	K11181	339.9	1	1	1	0	0	1
fruB	K11183	723.3	0.540244	0.442557	1	2.47e-05	0.5574	0.999905
hpr	K11189	22.9	0.702505	0.995359	1	0.000387	0.00464	0.999611
murEIIB	K11191	430.5	0.985	0.9713	1	0	0.0287	1
murEIIC	K11192	356.5	0.983	0.9672	1	0	0.0328	1
mngEIIA	K11198	965.9	0.947	0.9	1	0	0.1	1
mngEIIB	K11199	966.1	0.947	0.9	1	0	0.1	1
mngEIIC	K11200	963.4	0.947	0.9	1	0	0.1	1
fru2EIIA	K11201	628.6	0.787062	0.743	1	7.18e-06	0.257	1
fru2EIIB	K11202	134.9	0.732606	0.78052	1	3.03e-05	0.21948	1
fru2EIIC	K11203	425.5	0.874142	0.77959	1	2.52e-07	0.22041	1
eamB	K11249	119.3	0.995	0.98958	1	0	0.01042	1
leuE	K11250	140.9	0.9964	0.99283	1	0	0.00717	1
aclSsmall_2	K11258	59.3	0.981224	0.9631	1	0	0.03686	1
fwdG	K11260	74.9	0.546	0.97414	1	2.33e-05	0.02586	1
fwdE	K11261	41.2	1	1	1	0	0	1
nrsA	K11326	1880.7	1	1	1	0	0	1
nrsS	K11328	661.1	0.966	0.9333	1	0	0.0667	1
nrsR	K11330	427.6	1	1	1	0	0	1
bchX	K11333	409.1	1	1	1	0	0	1
bchY	K11334	511.9	1	1	1	0	0	1
bchZ	K11335	547	1	1	1	0	0	1
bchF	K11336	168.7	1	1	1	0	0	1
bchC	K11337	249.8	1	1	1	0	0	1
yhdR	K11358	316.4	0.994	0.9871	1	0	0.0129	0.999999
kdpgA	K11395	367.4	0.971	0.944	1	0	0.0556	1
gbsB	K11440	530.9	0.993	1	1	1.26e-07	0	1
fbpII-sebp	K11532	484.6	0.792666	0.66118	1	3.78e-07	0.33882	1
nupC	K11535	602.7	0.891126	0.87624	1	9.19e-06	0.12376	0.999978
xapB	K11537	637.4	0.907	0.8292	1	0	0.17082	1
mntC1	K11601	441.4	0.92	0.86429	1	2.52e-07	0.13571	1
mntB1	K11602	388.6	0.971	0.95	1	1.26e-07	0.05	1
mntA1	K11603	361.8	0.886	0.81343	1	3.78e-07	0.18657	1
sitA	K11604	474.6	0.975659	0.95248	1	0	0.04752	1
sitC	K11605	355.1	0.980866	0.97206	1	6.3e-07	0.02794	1
sitD	K11606	372.2	0.97665	0.95437	1	0	0.04563	1
sitB	K11607	374.8	0.975321	0.98998	1	2.52e-06	0.01002	1
maeN	K11616	245.3	1	1	1	0	0	1
bceA	K11631	412.2	0.976	0.97596	1	6.3e-07	0.02404	1
bceB	K11632	684.2	0.99	0.99043	1	2.52e-07	0.00957	1
aldo.classI-2	K11645	275.9	0.86654	0.76451	1	0	0.23549	0.999973
dctP	K11688	356.3	0.964593	0.9333	1	1.26e-07	0.06667	1
dctQ	K11689	133.4	0.984431	0.99275	1	1.26e-06	0.00725	1
dctM	K11690	501.5	0.936073	0.88553	1	3.78e-07	0.11447	1
mtsA	K11704	478.9	0.37	0.9455	1	2.19e-05	0.0545	1
mtsC	K11705	411.4	0.318	0.9825	1	3.01e-05	0.0175	1
mtsB	K11706	331.5	0.244	0.9298	1	4.09e-05	0.0702	1
troA	K11707	267.6	0.911885	0.91753	1	5.79e-06	0.08247	1
troC	K11708	252.4	0.828571	0.71047	1	2.52e-07	0.28953	1
troD	K11709	252.9	0.853503	0.74444	1	0	0.25556	1
troB	K11710	351.2	0.859189	0.78603	1	2.52e-06	0.21397	1
lptC	K11719	51.9	0.997716	0.99829	1	6.3e-07	0.001714	1
lptG	K11720	184.9	0.948563	0.91912	1	6.68e-06	0.08088	0.999965
#N/A	K11725	205.4	1	1	1	0	0	1
pheP	K11732	774.6	0.995	0.991	1	0	0.00897	1
lysP	K11733	665	0.988603	0.986521	1	1.39e-06	0.013479	0.999997
proY	K11736	853.7	0.996	0.9915	1	0	0.00855	1
cycA	K11737	663	0.979777	0.965826	1	8.81e-07	0.034174	0.999994
ansP	K11738	570.5	0.996359	0.99274	1	0	0.00726	0.999999
rseP	K11749	87.4	0.999295	0.998873	1	1.26e-07	0.001127	0.999999
ebrA	K11814	142.6	0.938	0.8831	1	0	0.1169	1
ebrB	K11815	158.2	0.974	0.9487	1	0	0.0513	1
putP	K11928	353.8	0.902113	0.96778	1	3.75e-05	0.03222	0.999956
phoE	K11929	555	0.95292	0.9101	1	0	0.0899	1
rhtA	K11939	107.2	0.996246	0.992521	1	0	0.007479	0.999999
cmpA	K11950	700.1	0.991	0.9821	1	0	0.0179	1
cmpB	K11951	442.1	0.991	0.9818	1	0	0.0182	1
cmpC	K11952	1194.2	0.991	0.9825	1	0	0.0175	1
cmpD	K11953	482.5	0.61	0.942	1	9.95e-06	0.058	1
natB1	K11954	328.6	0.984	0.9839	1	1.26e-07	0.0161	1
natC	K11955	292.8	0.946	0.9242	1	2.52e-07	0.0758	1
natD1	K11956	293.4	0.915	0.9375	1	1.13e-06	0.0625	1
natA1	K11957	421.9	0.909	0.873	1	3.78e-07	0.127	1
natE	K11958	389.1	0.906	0.8689	1	3.78e-07	0.1311	1
urtA	K11959	419.7	0.987903	0.976874	1	1.26e-07	0.023126	0.999996
urtB	K11960	240.8	0.997473	0.995795	1	1.26e-07	0.004205	1
urtC	K11961	236.9	0.997866	0.99659	1	1.26e-07	0.00341	0.999999
urtD	K11962	266.3	0.98331	0.988255	1	3.27e-06	0.011745	0.99999
urtE	K11963	283.6	0.97056	0.96731	1	3.9e-06	0.032691	0.99999
trbI	K12062	35	0.815	0.7417	1	2.64e-06	0.2583	1
hyfE	K12140	30.7	0.997021	0.99801	1	2.52e-07	0.00199	1
norV	K12264	783.8	0.992	0.9837	1	0	0.01634	1
norW	K12265	458.1	0.993	0.9867	1	0	0.01333	1
comA	K12292	1102.5	0.866	0.7632	1	0	0.2368	1
dppA1	K12368	742.9	0.938761	0.89575	1	2.39e-06	0.10425	0.99998
dppB1	K12369	488.2	0.992774	0.98674	1	1.26e-07	0.01326	0.999998
dppC1	K12370	402.4	0.98938	0.98224	1	3.78e-07	0.01776	0.999998
dppD1	K12371	535.7	0.238425	0.75346	1	0.000499	0.24654	0.999474
dppF1	K12372	567.4	0.35915	0.5321	1	0.00016	0.46794	0.999787
tadC	K12511	137.6	0.969757	0.954075	1	2.64e-06	0.045925	0.999988
hasA	K12545	102.1	1	1	1	0	0	1
rnr	K12573	430.7	0.972805	0.957559	1	5.04e-06	0.042441	0.999976
abgA	K12940	414.7	0.997	0.99419	1	0	0.00581	1
abgB	K12941	195	0.998106	1	1	2.52e-07	0	1
abgT	K12942	61.5	1	1	1	0	0	1
arnE	K12962	81.9	0.989498	0.97921	1	0	0.02079	1
cps	K13048	558.3	1	1	1	0	0	1
iaaA	K13051	235.1	0.975177	0.966608	1	2.27e-06	0.033392	0.999993
wprA	K13274	853.8	0.86	0.9286	1	1.64e-06	0.0714	1
isp	K13275	328	0.997	0.9944	1	0	0.00559	1
bpr	K13276	639.7	0.984	0.9789	1	1.26e-07	0.0211	1
epr	K13277	478.3	0.844	0.7386	1	1.26e-07	0.2614	1
sipW	K13280	60.1	0.98134	0.9784	1	1.64e-06	0.0216	0.999996
cphB	K13282	86.9	0.960417	0.94082	1	1.13e-06	0.05918	1
fieF	K13283	155.1	0.99919	0.99838	1	0	0.00162	1
nuoCD	K13378	618.1	0.985507	0.99239	1	2.14e-06	0.00761	1
nuoBCD	K13380	1345.3	1	1	1	0	0	1
cvaB	K13409	665.5	0.927512	0.87287	1	7.55e-07	0.12713	1
avrRpt2	K13439	97.5	1	1	1	0	0	1
avrPphB	K13440	639.4	1	1	1	0	0	1
icsP	K13520	623.5	1	1	1	0	0	1
bchV	K13603	245.7	1	1	1	0	0	1
bchU	K13604	554.2	1	1	1	0	0	1
bchK	K13605	535.8	1	1	1	0	0	1
wcaD	K13620	420.5	0.997	0.995	1	0	0.00549	1
dsdX	K13629	485.6	0.982	0.9688	1	1.26e-07	0.03125	1
soxR	K13639	108.7	0.99723	0.994475	1	0	0.005525	0.999999
wcaE	K13683	180.4	0.985	0.97585	1	1.26e-07	0.0242	1
wcaC	K13684	62.9	0.997	1	1	1.26e-07	0	1
mepS	K13694	192.9	0.887299	0.87943	1	7.3e-06	0.12057	1
nlpC	K13695	206	0.918406	0.86429	1	1.26e-06	0.13571	1
sspB	K13715	465.1	1	1	1	0	0	1
trf2_3	K13722	893.6	0.986	1	1	1.26e-07	0	1
pta2	K13788	514.9	0.992687	0.98548	1	0	0.01452	0.999997
pgi-tal	K13810	630.3	0.877323	0.84892	1	1.51e-06	0.151	1
fae-hps	K13812	390.9	0.988	0.9762	1	0	0.0238	1
fliRflhB	K13820	694.1	0.97	0.9423	1	0	0.0577	1
hps-phi	K13831	384	1	1	1	0	0	1
glf	K13854	998.2	1	1	1	0	0	1
macA	K13888	365.8	0.958316	0.9222	1	3.78e-07	0.0778	0.999988
gsiB	K13889	544.1	0.98988	0.98175	1	1.26e-07	0.01825	0.999999
gsiC	K13890	421	0.974729	0.952	1	1.26e-07	0.04762	1
gsiD	K13891	423	0.976526	0.95588	1	1.26e-07	0.04412	1
gsiA	K13892	956.4	0.948381	0.9361	1	2.77e-06	0.0639	1
mdcF	K13936	327.6	0.992	0.9839	1	0	0.01613	1
hmd	K13942	581.4	1	1	1	0	0	1
adhP	K13953	346.7	0.921804	0.87619	1	7.56e-06	0.12381	0.999955
yiaY	K13954	558.2	0.878425	0.78321	1	0	0.21679	1
puhA	K13991	74.5	1	1	1	0	0	1
pufC	K13992	48.4	1	1	1	0	0	1
pufX	K13994	103.7	1	1	1	0	0	1
mxaF	K14028	1070.1	0.99	0.9796	1	0	0.0204	1
mxaI	K14029	133.4	1	1	1	0	0	1
ureAB	K14048	194.3	0.99	0.98077	1	0	0.01923	1
puuP	K14052	232	1	1	1	0	0	1
vhtA	K14068	614	1	1	1	0	0	1
vhtC	K14069	294.9	0.99	0.9808	1	0	0.0192	1
vhtG	K14070	508.8	1	1	1	0	0	1
mtaC	K14081	320.2	1	1	1	0	0	1
mtbA	K14082	301.7	0.986	0.9722	1	0	0.0278	1
mttB	K14083	31.2	1	1	1	0	0	1
mttC	K14084	285.4	0.781	0.6477	1	1.26e-07	0.3523	1
echA	K14086	475.8	0.990909	0.98198	1	0	0.018	1
echB	K14087	335.3	0.976	1	1	2.52e-07	0	1
echC	K14088	223.3	0.914	0.8519	1	1.26e-07	0.1481	1
echD	K14089	58.4	0.993	0.9857	1	0	0.0143	1
echE	K14090	467.9	0.98	0.974	1	1.26e-07	0.026	1
echF	K14091	143.4	0.547	0.6721	1	6.04e-06	0.3279	1
acsB	K14138	964.1	0.994	0.9881	1	0	0.0119	1
panF	K14392	408	0.961334	0.9269	1	1.26e-07	0.0731	1
actP	K14393	240.1	0.992418	0.990442	1	1.76e-06	0.009558	0.999995
mfch	K14449	218.2	1	1	1	0	0	1
ssadh	K14465	502.5	0.963	1	1	2.52e-07	0	1
4hbl3	K14466	974.6	1	1	1	0	0	1
4hbl2	K14467	849.1	0.909	1	1	2.52e-07	0	1
mcr	K14468	1828.9	1	1	1	0	0	1
acr-hydt	K14469	1778.8	1	1	1	0	0	1
mct	K14470	505.1	1	1	1	0	0	1
smtA	K14471	842.5	1	1	1	0	0	1
smtB	K14472	703.5	1	1	1	0	0	1
abfD	K14534	482.5	0.987	0.99363	1	3.78e-07	0.00637	1
cruA	K14605	509.2	0.988	0.9765	1	0	0.0235	1
aprE2	K14645	338.9	0.92235	0.93062	1	9.19e-06	0.06938	0.999984
vpr	K14647	463	0.983	0.96732	1	0	0.0327	1
amhX	K14665	310.5	0.998	0.99592	1	0	0.00408	1
mycP	K14743	196.8	0.99435	0.98876	1	0	0.01124	1
rzpD	K14744	35.8	0.999149	0.9983	1	0	0.0017	1
regB	K15011	187	0.998349	0.9967	1	0	0.0033	1
regA	K15012	147.2	0.998388	0.99678	1	0	0.00322	1
cch-hbcd	K15016	650.8	0.882	0.78882	1	0	0.21118	1
asd1	K15017	702.8	1	1	1	0	0	1
hys	K15018	1333.8	1	1	1	0	0	1
hydt	K15019	339.1	0.93	0.8889	1	1.26e-07	0.1111	1
acr	K15020	375.6	0.978	1	1	2.52e-07	0	1
fdh.NADP+B	K15022	716.2	1	1	1	0	0	1
acsE	K15023	318.9	0.971	0.9565	1	1.26e-07	0.0435	1
pta3	K15024	264.6	0.953	0.93578	1	7.55e-07	0.06422	1
pcc1	K15036	877.9	1	1	1	0	0	1
pcc2	K15037	187.9	1	1	1	0	0	1
asd2	K15038	714.5	1	1	1	0	0	1
hpd	K15039	557	1	1	1	0	0	1
aclA	K15230	945.6	1	1	1	0	0	1
aclB	K15231	350.2	1	1	1	0	0	1
eamA	K15268	134.5	0.993988	0.99399	1	7.56e-07	0.00601	0.999998
sam	K15270	164.6	1	1	1	0	0	1
gdh2	K15371	70.8	1	1	1	0	0	1
wtpA	K15495	134.6	0.976	0.95652	1	1.26e-07	0.04348	1
wtpB	K15496	263.2	0.843	0.72845	1	0	0.27155	1
wtpC	K15497	395.6	0.4	0.29771	1	3.15e-06	0.70229	1
mdtO	K15547	258.7	1	1	1	0	0	1
mdtP	K15550	537.3	1	1	1	0	0	1
tauA	K15551	203.9	0.995846	0.99526	1	3.78e-07	0.00474	0.999999
tauC	K15552	280.2	0.910734	0.9264	1	1.18e-05	0.07356	0.99998
ssuA	K15553	190.3	0.95047	0.96642	1	2.32e-05	0.033577	0.999965
ssuC	K15554	268.8	0.963375	0.9348	1	1.51e-06	0.0652	0.999982
ssuB	K15555	299.1	0.801967	0.843682	1	6.02e-05	0.156318	0.999904
nrtA	K15576	474.9	0.87234	0.88005	1	1.37e-05	0.11995	1
nrtB	K15577	257.1	0.958491	0.98961	1	7.3e-06	0.01039	1
nrtC	K15578	351.5	0.882175	0.95052	1	1.98e-05	0.04948	1
nrtD	K15579	394.9	0.382	1	1	1.59e-05	0	1
oppA1	K15580	387.1	0.887118	0.875835	1	5.77e-05	0.124165	0.99987
oppB1	K15581	340.7	0.864208	0.84269	1	3.43e-05	0.157312	0.999916
oppC1	K15582	354.4	0.849008	0.77848	1	1.76e-05	0.221519	0.999912
oppD1	K15583	459.1	0.345731	0.816158	0.999	0.000888	0.183842	0.999056
nikA	K15584	449.4	0.962963	0.9567	1	1.76e-06	0.04329	1
nikB	K15585	383.9	0.948235	0.94824	1	2.77e-06	0.05176	1
nikC	K15586	347.7	0.945189	0.92601	1	1.76e-06	0.07399	1
nikD	K15587	322.1	0.085076	0.7266	0.999	0.000785	0.2734	0.999
gpmI	K15633	111.8	1	1	1	0	0	1
gpmB	K15634	142.1	0.777728	0.831934	1	0.000245	0.16807	0.999622
apgM	K15635	101.5	1	1	1	0	0	1
czcC	K15725	203.2	0.974048	0.94941	1	0	0.05059	0.999992
czcA	K15726	1149.6	0.983971	0.97141	1	7.56e-07	0.02859	0.999992
AL1	K15745	612.7	1	1	1	0	0	1
ganO	K15770	336.6	0.826867	0.767028	1	1.44e-05	0.232972	0.999948
ganP	K15771	344.1	0.859368	0.7856	1	6.8e-06	0.214399	0.999959
ganQ	K15772	298.2	0.925681	0.87922	1	3.27e-06	0.12078	0.999977
nuoLM	K15863	1850	0.98	0.96	1	0	0.04	1
nirS	K15864	442.4	0.996283	0.99259	1	0	0.00741	1
nrfH	K15876	120	0.983	0.96679	1	0	0.03321	1
pgi-pmi	K15916	163	1	1	1	0	0	1
pslB	K16011	518.1	0.755938	0.938099	1	9.29e-05	0.061901	0.999897
cydC	K16012	419.8	0.842798	0.95105	1	7e-05	0.04895	0.999919
cydD	K16013	442.3	0.860963	0.983343	1	6.83e-05	0.01666	0.999928
cydCD	K16014	974.4	0.937	0.88571	1	1.26e-07	0.11429	0.999997
tps	K16055	679.8	0.982	0.96377	1	0	0.03623	1
zntB	K16074	197.1	0.994163	0.99016	1	2.52e-07	0.009839	0.999998
scrY	K16077	229.6	0.995	0.99026	1	0	0.00974	1
algE	K16081	129.9	1	1	1	0	0	1
fpvA	K16088	435.6	0.976729	0.97322	1	3.78e-06	0.02678	0.999991
cfrA	K16089	515.4	0.802782	0.68125	1	2.9e-06	0.31875	0.999939
fiu	K16090	592	0.986888	0.977489	1	5.04e-07	0.022511	0.999996
fecA	K16091	306.8	0.988934	0.98037	1	2.52e-07	0.01963	0.999998
btuB	K16092	439.4	0.92417	0.864148	1	1.13e-06	0.135852	0.99997
uidB	K16139	446.8	0.936	0.88	1	0	0.12	1
uidC	K16140	35.3	1	1	1	0	0	1
hasR	K16152	672.5	0.991	0.98165	1	0	0.01835	1
mmoX	K16157	574.6	0.909	1	1	2.52e-07	0	1
mmoY	K16158	575.9	0.857	0.75	1	0	0.25	1
mmoZ	K16159	216.3	0.923	1	1	1.26e-07	0	1
mmoC	K16161	435.6	0.923	1	1	1.26e-07	0	1
mmoD	K16162	34.3	1	1	1	0	0	1
pucJ	K16170	968.7	1	1	1	0	0	1
mtmB	K16176	46	0.944	0.8947	1	0	0.105	1
mtmC	K16177	361.5	0.992	0.9846	1	0	0.0154	1
mtbB	K16178	267.2	0.97	0.9412	1	0	0.0588	1
mtbC	K16179	287.1	0.966	0.9341	1	0	0.0659	1
dppE	K16199	790.7	1	1	1	0	0	1
dppB2	K16200	517.1	1	1	1	0	0	1
dppC2	K16201	507.2	0.978	0.9565	1	0	0.0435	1
dppD2	K16202	598.7	0.104	0.8222	1	0.000159	0.1778	1
dppA	K16203	33.9	1	1	1	0	0	1
lacS	K16209	280	0.973	0.9585	1	3.78e-07	0.04149	1
togT	K16210	319.1	0.983642	0.96781	1	0	0.03219	1
malY	K16211	71.5	1	1	1	0	0	1
hutT	K16234	722.8	0.959698	0.92252	1	0	0.07748	0.999996
mmuP	K16235	696.5	0.863636	0.8231	1	5.79e-06	0.1769	1
hutM	K16236	873.2	0.967	0.9362	1	0	0.0638	1
gutA	K16248	467.5	0.909	0.8571	1	2.52e-07	0.1429	1
mxaJ	K16254	244.3	1	1	1	0	0	1
mxaG	K16255	145.4	1	1	1	0	0	1
mxaA	K16256	188.7	1	1	1	0	0	1
mxaC	K16257	343.4	1	1	1	0	0	1
mxaK	K16258	107.5	1	1	1	0	0	1
mxaL	K16259	291.1	1	1	1	0	0	1
mxaD	K16260	70.5	0.986	1	1	1.26e-07	0	1
yjeH	K16263	240.1	0.984615	0.99225	1	1.89e-06	0.00775	1
czcD	K16264	131	0.994995	0.990698	1	2.52e-07	0.009302	0.999996
zipB	K16267	142.5	0.996	0.99574	1	1.26e-07	0.00426	1
erfK	K16291	393.5	0.805902	0.71142	1	3.4e-06	0.28858	1
eexD	K16299	846.5	0.848	0.7368	1	0	0.2632	1
efeB	K16301	438.2	0.979006	0.95887	1	0	0.04113	0.999995
fba_2	K16305	519.4	0.937	0.8966	1	1.26e-07	0.1034	1
fba_3	K16306	344	0.855	0.94712	1	7.05e-06	0.05288	1
gntP	K16321	614.9	0.992	0.985	1	0	0.01538	1
pit	K16322	555.5	0.993949	0.99245	1	3.78e-07	0.00755	1
yxjA	K16323	492.2	0.992	0.98864	1	1.26e-07	0.01136	1
psuT	K16324	666.1	0.792	0.9833	1	7.55e-06	0.01667	1
nupX	K16325	850.9	0.975	0.9516	1	0	0.0484	1
tc_2.A.76.1.6	K16327	259.1	1	1	1	0	0	1
ylnA	K16331	277.1	0.99	0.9901	1	1.26e-07	0.0099	1
xanP	K16345	600.6	0.986895	0.97413	1	0	0.02587	0.999997
xanQ	K16346	867.2	0.985	1	1	3.78e-07	0	1
pfkB	K16370	314.3	0.914861	0.859	1	1.64e-06	0.14099	1
exoF	K16552	355.1	0.882	0.9375	1	1.13e-06	0.0625	1
exoT	K16553	875.3	1	1	1	0	0	1
exoY	K16566	308.6	0.917	0.8571	1	1.26e-07	0.1429	1
tuaB	K16694	425.6	0.942	0.95	1	5.04e-07	0.05	1
wzxC	K16695	476.8	0.939	0.9079	1	7.55e-07	0.09211	1
amsL	K16696	531.9	1	1	1	0	0	1
wcaL	K16703	189.6	0.994	0.99623	1	2.52e-07	0.00377	1
wcaK	K16710	90.7	0.982	1	1	1.13e-06	0	1
wcaM	K16711	55.9	1	1	1	0	0	1
epsE	K16712	935.8	1	1	1	0	0	1
epsF	K16713	877.2	1	1	1	0	0	1
bioN	K16783	179.2	0.844749	0.74297	1	1.01e-06	0.25703	1
bioM	K16784	302.2	0.29412	0.51971	1	0.000142	0.48029	1
ecfT	K16785	111	0.856662	0.845506	1	6.34e-05	0.15449	0.99986
ecfA1	K16786	342.6	0.704344	0.582389	1	3.49e-05	0.417611	0.999761
ecfA2	K16787	382.4	0.673889	0.546653	1	3.69e-05	0.453347	0.999742
niaX	K16788	68	0.996	0.992	1	0	0.008	1
thiT	K16789	56.5	0.99368	0.98743	1	0	0.01257	1
qmoA	K16885	618.7	0.993	1	1	1.26e-07	0	1
qmoB	K16886	998.5	1	1	1	0	0	1
qmoC	K16887	327.9	0.872	0.7885	1	1.26e-07	0.2115	1
flqA	K16905	127	0.986	0.9863	1	2.52e-07	0.0137	1
flqB	K16906	118.4	0.99	0.9797	1	0	0.02027	1
flqC	K16907	388.9	0.956	0.9156	1	0	0.08442	1
cbiL	K16915	87.6	0.852	0.88194	1	6.8e-06	0.11806	1
yydJ	K16916	185.9	1	1	1	0	0	1
yydI	K16917	250	1	1	1	0	0	1
ytrF	K16918	488	1	1	1	0	0	1
ytrC_D	K16919	403	1	1	1	0	0	1
ytrE	K16920	330.8	0.993	1	1	1.26e-07	0	1
ytrB	K16921	580.7	1	1	1	0	0	1
yydH	K16922	77.4	0.956	0.91733	1	1.26e-07	0.08267	1
doxA	K16936	19.6	0.989	0.9787	1	0	0.0213	1
doxD	K16937	65.3	0.886768	0.82388	1	3.65e-06	0.17612	0.999978
asrA	K16950	405.5	1	1	1	0	0	1
asrB	K16951	277.5	0.997	0.9943	1	0	0.00575	1
sor	K16952	394	1	1	1	0	0	1
dddL	K16953	236.9	1	1	1	0	0	1
mmtsA	K16954	666	1	1	1	0	0	1
tcyJ	K16956	399.3	1	1	1	0	0	1
tcyK	K16957	239.5	0.895	0.94946	1	6.04e-06	0.05054	1
tcyL	K16958	259.2	0.843	0.80156	1	3.27e-06	0.19844	1
tcyM	K16959	261.2	0.85	0.80952	1	3.27e-06	0.19048	1
tcyN	K16960	404.8	0.765	0.62162	1	1.26e-07	0.37838	1
serA	K17050	1034.9	0.872	0.8095	1	1.26e-07	0.1905	1
serB	K17051	525.4	0.857	0.8182	1	2.52e-07	0.1818	1
serC	K17052	133.5	0.824	0.7	1	0	0.3	1
bgtB	K17062	692.4	1	1	1	0	0	1
bgtA	K17063	446.8	1	1	1	0	0	1
lysX1	K17073	242	0.96	0.92364	1	0	0.0764	1
lysX2	K17074	279.8	0.95113	0.91007	1	1.26e-07	0.0899	0.999997
lysY	K17076	354.2	0.968	0.93836	1	0	0.06164	1
artQ2	K17077	252.3	0.862676	0.8203	1	9.19e-06	0.17969	0.999971
eryG	K17202	385.6	0.987	0.97674	1	1.26e-07	0.0233	1
eryF	K17203	378.9	0.985	0.97342	1	1.26e-07	0.02658	1
eryE	K17204	645.5	0.997	1	1	2.52e-07	0	1
xltC	K17205	405	0.997	1	1	1.26e-07	0	1
xltB	K17206	393	0.971	0.94286	1	0	0.05714	0.999999
xltA	K17207	710.3	0.990712	0.9816	1	0	0.0184	1
ibpA1	K17208	397.3	0.995	1	1	1.26e-07	0	1
iatP1	K17209	483.4	0.986	0.97196	1	0	0.02804	1
iatA1	K17210	674.8	1	1	1	0	0	1
ibpA2	K17213	302.1	0.875664	0.91759	1	1.01e-05	0.08241	1
iatP2	K17214	402.8	0.91	0.85522	1	8.81e-07	0.14478	1
iatA2	K17215	722.6	0.931	0.91003	1	1.64e-06	0.08997	1
sqr	K17218	218.1	0.97577	0.962532	1	2.01e-06	0.0375	0.999991
sreA	K17219	2418.5	1	1	1	0	0	1
sreB	K17220	532	1	1	1	0	0	1
sreC	K17221	932.7	1	1	1	0	0	1
soxB	K17224	356.5	0.996	0.99145	1	0	0.00855	1
soxC	K17225	460	1	1	1	0	0	1
fccB	K17229	476.3	1	1	1	0	0	1
fccA	K17230	85	0.938	1	1	6.29e-07	0	1
araN	K17234	345.9	0.9607	0.9244	1	0	0.0756	0.999999
araP	K17235	328.6	0.991	0.9813	1	0	0.01869	1
araQ	K17236	371.5	0.986	0.9722	1	0	0.02778	1
inoE	K17237	264.5	0.995	0.99048	1	0	0.00952	1
inoF	K17238	299.3	1	1	1	0	0	1
inoG	K17239	272.3	1	1	1	0	0	1
inoK	K17240	480.8	0.899	0.9271	1	1.64e-06	0.0729	1
aguE	K17241	254	1	1	1	0	0	1
aguF	K17242	335.1	0.944	0.90071	1	1.26e-07	0.09929	1
aguG	K17243	319.4	0.993	1	1	2.52e-07	0	1
chiE	K17244	378.5	0.997	0.99351	1	0	0.00649	1
chiF	K17245	356.5	0.989967	0.98013	1	0	0.01987	1
chiG	K17246	329.5	0.976898	0.95484	1	0	0.04516	1
gtsA	K17315	254.4	0.994502	0.99147	1	2.52e-07	0.00853	0.999999
gtsB	K17316	283.6	0.995763	0.99296	1	1.26e-07	0.00704	1
gtsC	K17317	277.1	0.996481	0.99578	1	2.52e-07	0.00422	1
lplA	K17318	190.8	0.988612	0.98646	1	2.39e-06	0.01354	0.99999
lplB	K17319	224.4	0.997199	0.99796	1	8.82e-07	0.00204	0.999999
lplC	K17320	235.5	0.992908	0.994924	1	2.27e-06	0.005076	0.999996
glpV	K17321	255.2	0.996	0.99138	1	0	0.00862	1
glpP	K17322	358.7	1	1	1	0	0	1
glpQ	K17323	334.1	1	1	1	0	0	1
glpS	K17324	344.2	1	1	1	0	0	1
glpT	K17325	416	1	1	1	0	0	1
bxlE	K17326	553.1	1	1	1	0	0	1
bxlF	K17327	437.2	1	1	1	0	0	1
bxlG	K17328	403.8	0.968	0.938	1	0	0.0625	1
dasA	K17329	287.4	0.996	0.99245	1	0	0.00755	1
dasB	K17330	310.9	0.978	0.96104	1	1.26e-07	0.03896	1
dasC	K17331	332.1	0.983	0.96596	1	0	0.03404	1
dgaF	K17463	71.6	1	1	1	0	0	1
dgaEIIA	K17464	129.5	0.987	0.99115	1	2.52e-07	0.00885	1
dgaEIIB	K17465	196.5	0.979	0.9583	1	0	0.04167	1
dgaEIIC	K17466	282.4	0.996	0.991	1	0	0.00855	1
dgaEIID	K17467	361.9	0.969	0.94	1	0	0.06034	1
capD	K17716	391.1	0.976055	0.95323	1	0	0.04677	1
cwlK	K17733	63.4	0.991349	0.99307	1	7.55e-07	0.00693	1
aprX	K17734	323.2	0.907975	0.83459	1	1.26e-07	0.16541	1
hicdh	K17753	604.1	1	1	1	0	0	1
codA	K17755	1047.2	1	1	1	0	0	1
ARD1	K17818	360.3	1	1	1	0	0	1
hydA_1	K17993	588.1	1	1	1	0	0	1
hydD	K17994	337.9	1	1	1	0	0	1
hydG	K17995	438.3	1	1	1	0	0	1
hydB_1	K17996	445.5	1	1	1	0	0	1
elaD	K18015	32.2	1	1	1	0	0	1
oprD	K18093	471.9	0.989967	0.9801	1	0	0.01987	1
mexB	K18138	1027.2	0.709048	0.98025	1	0.0003	0.01975	0.999692
acrF	K18142	2032.2	0.987	0.9745	1	0	0.0255	1
adeB	K18146	1677.6	0.982	0.9647	1	0	0.03529	1
adeC	K18147	957.7	1	1	1	0	0	1
inhA	K18199	151.7	0.984	0.96835	1	0	0.03165	1
steA	K18216	805.5	0.977	0.955	1	0	0.0455	1
steB	K18217	775.3	0.977	0.9556	1	0	0.0444	1
tet35	K18218	599.9	1	1	1	0	0	1
oleC4	K18232	465	0.973	0.96491	1	2.52e-07	0.03509	1
oleC5	K18233	335.2	0.967	0.9508	1	1.26e-07	0.0492	1
oprN	K18300	554.6	0.889	0.8	1	0	0.2	1
opmD	K18308	584.7	1	1	1	0	0	1
smeB	K18322	1875.3	1	1	1	0	0	1
smeC	K18323	721.5	1	1	1	0	0	1
acrD	K18324	1828.8	0.985	0.9702	1	0	0.02976	1
mdtD	K18326	280	0.998	0.99693	1	0	0.00307	1
frvX	K18530	363.9	1	1	1	0	0	1
sprA	K18544	436	0.857	1	1	2.52e-07	0	1
sprB	K18545	411.9	0.914	0.8767	1	3.78e-07	0.1233	1
sprC	K18546	358.8	0.911	0.85632	1	5.04e-07	0.14368	1
sprD	K18547	375.5	0.94	0.9307	1	6.3e-07	0.0693	1
sprE	K18548	645.9	1	1	1	0	0	1
cmlA	K18552	360	0.973	0.9467	1	0	0.0533	1
frd.NADHA	K18556	1136.6	1	1	1	0	0	1
frd.NADHB	K18557	381	1	1	1	0	0	1
frd.NADHC	K18558	629.6	1	1	1	0	0	1
frd.NADHD	K18559	793.8	1	1	1	0	0	1
frd.NADHE	K18560	274.7	1	1	1	0	0	1
pbuE	K18567	395.9	0.973	0.94694	1	0	0.05306	1
ptpA	K18574	1248.2	1	1	1	0	0	1
pcc5	K18603	905.7	1	1	1	0	0	1
pcc3	K18604	986.9	1	1	1	0	0	1
pcc4	K18605	237.4	1	1	1	0	0	1
mgs	K18818	818.2	1	1	1	0	0	1
sdhD_arch1	K18859	161.3	1	1	1	0	0	1
sdhD_arch2	K18860	143	1	1	1	0	0	1
4hbl1	K18861	931.1	1	1	1	0	0	1
vanXY	K18866	240	1	1	1	0	0	1
mdtF	K18899	2073.6	0.963	0.929	1	0	0.0714	1
bpeE	K18901	475.3	0.953	0.91268	1	1.26e-07	0.08732	1
bpeF	K18902	1853.7	0.98	0.96056	1	0	0.03944	1
oprC	K18903	480.3	0.975332	0.95185	1	0	0.04815	0.999998
ameC	K18904	589.4	1	1	1	0	0	1
relB	K18918	37.1	0.92973	0.91295	1	3.02e-06	0.08705	1
ykkC	K18924	118.2	0.95207	0.91232	1	2.52e-07	0.08768	1
ykkD	K18925	115.8	0.967431	0.93911	1	1.26e-07	0.06089	1
lldE	K18928	230.5	0.998404	0.996813	1	0	0.003187	0.999999
lldF	K18929	371.1	0.999311	0.998623	1	0	0.001377	1
ebr	K18975	210.3	1	1	1	0	0	1
ampH	K18988	284	0.995	0.9894	1	0	0.01061	1
vexF	K18989	1080.5	0.996	0.99119	1	0	0.00881	1
merC	K19058	23.3	0.973	0.9522	1	1.26e-07	0.0478	1
merE	K19059	47.1	1	1	1	0	0	1
braD	K19083	416.2	0.993	1	1	1.26e-07	0	1
braE	K19084	509.7	0.993	1	1	1.26e-07	0	1
tabP	K19111	754.7	1	1	1	0	0	1
cwlS	K19220	466.6	0.704	0.9333	1	5.41e-06	0.0667	1
lytF	K19223	540.1	0.811	0.7167	1	3.78e-07	0.2833	1
lytE	K19224	226.9	0.634	0.85714	1	1.71e-05	0.14286	1
gluP	K19225	126.5	0.96769	0.94331	1	5.04e-07	0.05669	1
sapA	K19226	640	0.971731	0.96154	1	1.26e-06	0.03846	0.999996
sapB	K19227	365.2	0.994819	0.9897	1	0	0.01031	1
sapC	K19228	347.2	0.995701	0.99485	1	2.52e-07	0.00515	1
sapD	K19229	498.7	0.982906	0.99138	1	1.89e-06	0.00862	0.999997
sapF	K19230	442	0.396927	0.53356	1	8.45e-05	0.46644	1
ynhG	K19234	552.1	0.995	0.991	1	0	0.00897	1
ybiS	K19235	487.9	0.977	0.95946	1	2.52e-07	0.04054	1
ycfS	K19236	420	0.967442	0.9697	1	1.89e-06	0.0303	1
kgp	K19237	1247.5	0.571	1	1	3.78e-07	0	1
alg8	K19290	476.1	1	1	1	0	0	1
alg44	K19291	86	0.995	1	1	1.26e-07	0	1
algK	K19292	335.5	0.976	0.9717	1	2.52e-07	0.0283	1
algX	K19293	303.6	0.991	0.99107	1	1.26e-07	0.00893	1
algI	K19294	234.7	0.987775	0.97821	1	1.26e-07	0.02179	1
algJ	K19295	187.2	0.975	0.95161	1	0	0.04839	1
algF	K19296	134.4	0.995	0.99099	1	0	0.00901	1
mepH	K19303	152.5	0.986	0.97507	1	1.26e-07	0.02493	1
mepM	K19304	234.7	0.996	0.992	1	0	0.00797	1
bcrA	K19309	418.9	0.94198	0.91391	1	5.04e-07	0.08609	0.999998
bcrB	K19310	135.5	0.92	0.91975	1	1.64e-06	0.08025	1
nosF	K19340	311.5	0.295	0.82337	1	0.000174	0.17663	1
nosY	K19341	141.4	0.976801	0.96154	1	3.78e-07	0.03846	1
mpl	K19351	929.2	1	1	1	0	0	1
gfrEIIA	K19506	141.4	0.918	0.8542	1	1.26e-07	0.14583	1
gfrEIIB	K19507	165.3	0.974	0.96335	1	3.78e-07	0.0366	1
gfrEIIC	K19508	270.2	0.984	0.97895	1	2.52e-07	0.02105	1
gfrEIID	K19509	323.6	0.944	0.97095	1	2.64e-06	0.02905	1
oqxB	K19585	1907.8	0.985	0.97015	1	0	0.02985	1
opmE	K19593	641.2	1	1	1	0	0	1
gesB	K19594	1653.7	0.987	0.974	1	0	0.02632	1
fepA	K19611	519.2	0.989583	0.98083	1	1.26e-07	0.01917	1
ampS	K19689	31.8	1	1	1	0	0	1
pduW	K19697	716.7	0.987	0.97345	1	0	0.02655	1
ywaD	K19701	235.1	0.983	0.96732	1	0	0.03268	1
E3.4.11.24	K19702	291.6	0.967	0.9674	1	3.78e-07	0.0326	1
ydiF	K19709	753.1	0.996	0.9925	1	0	0.00752	1
tsdA	K19713	98.9	0.971946	0.94876	1	2.52e-07	0.05124	1
hdeA	K19777	46.8	0.993	0.9869	1	0	0.0131	1
hdeB	K19778	62	0.997	0.99349	1	0	0.00651	1
mntA2	K19973	337.9	0.937	0.8873	1	2.52e-07	0.11273	1
mntC2	K19975	464.3	0.857	0.76534	1	7.55e-07	0.23466	1
mntB2	K19976	385.2	0.938	0.88316	1	0	0.11684	1
malEIIB	K20107	515.3	0.951	0.90592	1	0	0.0941	1
malEIIC	K20108	515.3	0.951	0.90592	1	0	0.0941	1
zmp1	K20109	209.6	1	1	1	0	0	1
galEIIA	K20112	130.1	0.997	1	1	1.26e-07	0	1
galEIIB	K20113	94.9	1	1	1	0	0	1
galEIIC	K20114	478	0.988	0.9767	1	0	0.02326	1
glc2EIIA	K20116	739.5	0.91587	0.91762	1	5.67e-06	0.08238	1
glc2EIIB	K20117	712.8	0.847039	0.78746	1	5.92e-06	0.21254	1
glc2EIIC	K20118	711.7	0.847987	0.7902	1	6.04e-06	0.2098	1
alpha-LP	K20136	814.5	1	1	1	0	0	1
gadC	K20265	166.9	0.996817	0.994555	1	1.26e-07	0.005445	0.999999
zmpA	K20273	469.9	0.994	0.9875	1	0	0.0125	1
zmpB_M4	K20274	130.1	0.987	0.9744	1	0	0.0256	1
blpA	K20344	783	0.781	0.7193	1	5.29e-06	0.2807	1
nukF	K20459	370.2	0.823	0.73783	1	1.89e-06	0.26217	1
nukE	K20460	151.5	0.95	0.90411	1	0	0.09589	1
nukG	K20461	155.8	0.96	0.92969	1	2.52e-07	0.07031	1
mmpL11	K20466	1493.5	0.95	0.906	1	0	0.09434	1
tc2.A.86.1.7	K20469	186.1	1	1	1	0	0	1
nisA	K20482	33.1	1	1	1	0	0	1
nisP	K20486	264.6	0.941	0.9062	1	2.52e-07	0.0938	1
nisF	K20490	326.3	0.840404	0.73759	1	6.3e-07	0.26241	1
nisE	K20491	154.5	0.917466	0.84752	1	0	0.15248	1
nisG	K20492	111.9	0.993	1	1	3.78e-07	0	1
tet	K20608	388	1	1	1	0	0	1
sgcX	K20609	427.7	0.994	0.988	1	0	0.0119	1
ahy	K20625	1766	1	1	1	0	0	1
rpcG	K20713	874.2	1	1	1	0	0	1
ykfC	K20742	197.3	0.987	0.98214	1	2.52e-07	0.01786	1
npr	K20744	1127.3	1	1	1	0	0	1
E3.4.24.32	K20749	632.4	0.833	1	1	2.52e-07	0	1
bapA	K20750	891.5	1	1	1	0	0	1
pstI	K20754	555.2	0.974	1	1	1.26e-07	0	1
E3.4.21.121	K20755	109.9	0.996	0.99265	1	0	0.00735	1
vpsM	K20920	153.8	1	1	1	0	0	1
hzsC	K20932	921.9	1	1	1	0	0	1
hzsB	K20933	853.3	1	1	1	0	0	1
hzsA	K20934	1998.6	1	1	1	0	0	1
hdh	K20935	1567.9	1	1	1	0	0	1
graA	K20942	553.9	1	1	1	0	0	1
pslD	K20987	323.7	1	1	1	0	0	1
vpsN	K20988	189.3	0.949	0.98026	1	1.64e-06	0.01974	1
pslA	K20997	406.5	0.894	0.833	1	3.78e-07	0.1667	1
pslE	K20998	252.9	0.992	1	1	1.26e-07	0	1
pslF	K20999	167.1	0.991	1	1	1.26e-07	0	1
pslG	K21000	184.8	0.976	0.9683	1	1.26e-07	0.0317	1
pslH	K21001	301.4	0.929	0.8764	1	1.26e-07	0.1236	1
pslI	K21002	503.9	1	1	1	0	0	1
pslJ	K21003	160.9	0.967	0.935	1	0	0.0645	1
pslK	K21004	577.8	1	1	1	0	0	1
pslL	K21005	247.3	1	1	1	0	0	1
pelA	K21006	145.8	0.997	1	1	1.26e-07	0	1
pelB	K21007	187.6	0.996	0.99194	1	0	0.00806	1
pelC	K21008	125.7	1	1	1	0	0	1
pelD	K21009	147.7	1	1	1	0	0	1
pelE	K21010	94.3	0.997	1	1	1.26e-07	0	1
pelF	K21011	382	0.994	0.98842	1	0	0.01158	1
pelG	K21012	288.8	0.99	0.98785	1	2.52e-07	0.01215	1
bciC	K21058	224.6	1	1	1	0	0	1
pfk	K21071	359.7	0.745845	0.614562	1	6.29e-06	0.385438	0.999921
triC	K21134	1443	0.989	0.97908	1	0	0.02092	1
bciB	K21231	415.4	0.989	0.9888	1	1.26e-07	0.0112	1
soeA	K21307	380.3	0.988	0.97647	1	0	0.02353	1
soeB	K21308	296	0.988166	0.97661	1	0	0.02339	1
soeC	K21309	120.9	1	1	1	0	0	1
bciD	K21312	923.2	1	1	1	0	0	1
ggs	K21349	232.9	1	1	1	0	0	1
mggA	K21369	1182.5	1	1	1	0	0	1
yiaN	K21393	429.1	0.997691	0.9954	1	0	0.00461	1
yiaM	K21394	124	0.93056	0.90891	1	2.9e-06	0.09109	1
yiaO	K21395	352.3	0.828096	0.73684	1	3.27e-06	0.26316	1
impA	K21429	172.7	1	1	1	0	0	1
pbp4b	K21469	255.7	0.993	0.98655	1	0	0.01345	1
ycbB	K21470	120.1	0.995957	0.997301	1	1.01e-06	0.002699	0.999998
cwlO	K21471	156.5	0.617739	0.494191	1	3.21e-05	0.5058	0.999814
lytH	K21472	100.9	0.958115	0.9385	1	1.51e-06	0.06154	1
ripA	K21473	253.5	0.94	0.88737	1	0	0.11263	1
ripB	K21474	327.8	0.928	0.86607	1	0	0.13393	1
scmP	K21613	442.8	0.959897	0.94402	1	1.13e-06	0.05598	1
fdhC	K21993	278.4	0.933576	0.88296	1	6.3e-07	0.11704	1
kdgM	K22110	71.7	0.99926	0.99852	1	0	0.00148	1
amiS	K22112	150.2	0.947	0.9466	1	1.38e-06	0.0534	1
fpoA	K22158	151.3	1	1	1	0	0	1
fpoB	K22159	269.3	1	1	1	0	0	1
fpoC	K22160	995.8	0.121	0.0645	1	0	0.9355	1
fpoD	K22161	667.7	1	1	1	0	0	1
fpoF	K22162	454.7	1	1	1	0	0	1
fpoH	K22163	492.2	1	1	1	0	0	1
fpoI	K22164	180.8	1	1	1	0	0	1
fpoJ	K22165	95.1	0.885	0.7937	1	0	0.2063	1
fpoK	K22166	137.5	0.935	0.9	1	1.26e-07	0.1	1
fpoL	K22167	798.9	1	1	1	0	0	1
fpoM	K22168	557.8	0.988	1	1	1.26e-07	0	1
fpoN	K22169	553.3	0.952	0.9259	1	1.26e-07	0.0741	1
fpoO	K22170	53	1	1	1	0	0	1
scpC	K22214	766.2	0.982	0.966	1	0	0.0345	1
gpgP	K22306	201.7	0.773714	0.79089	1	2.73e-05	0.20911	0.99995
cct	K22447	278.8	0.9978	0.99561	1	0	0.00439	0.999999
jgt	K22451	82.1	0.998	1	1	1.26e-07	0	1
hdrA1	K22480	1119.3	1	1	1	0	0	1
hdrB1	K22481	357	1	1	1	0	0	1
hdrC1	K22482	201.5	0.989	1	1	1.26e-07	0	1
crtY	K22502	24.7	0.938	0.88393	1	0	0.116	1
fdhAF420	K22516	956	0.512	0.35897	1	1.51e-06	0.64103	1
hpxW	K22602	521.9	0.95883	0.95503	1	3.52e-06	0.04497	1
soxD	K22622	130.9	0.998822	0.99765	1	0	0.00235	1
vnfD	K22896	774.7	1	1	1	0	0	1
vnfK	K22897	859.7	1	1	1	0	0	1
vnfG	K22898	127.7	0.968	1	1	2.52e-07	0	1
vnfH	K22899	557.6	0.884	0.792	1	0	0.2083	1
mggS	K22908	203.8	1	1	1	0	0	1
tviA	K22914	93	1	1	1	0	0	1
tviD	K22915	1923.8	1	1	1	0	0	1
tviE	K22916	1334.4	1	1	1	0	0	1
vexE	K22917	1477.3	1	1	1	0	0	1
vexB	K22921	574.1	1	1	1	0	0	1
vexD	K22922	973.3	1	1	1	0	0	1
vexC	K22923	501.2	1	1	1	0	0	1
vexA	K22924	794.2	1	1	1	0	0	1
tviC	K22925	796.4	1	1	1	0	0	1
tviB	K22926	956.9	1	1	1	0	0	1
arg1	K23055	330.9	0.972	0.946	1	0	0.05366	1
arg2	K23056	288.5	0.98	0.9661	1	1.26e-07	0.0339	1
arg3	K23057	315.4	0.97	0.94083	1	0	0.05917	1
arg4	K23058	448.6	0.974	0.95	1	0	0.05	1
artP2	K23059	234.2	0.405678	0.84866	1	0.000153	0.15134	1
artR	K23060	391.3	0.737999	0.76134	1	3.18e-05	0.23866	0.999943
lhpP	K23061	347.8	1	1	1	0	0	1
lhpM	K23062	291.6	1	1	1	0	0	1
lhpN	K23063	282.7	1	1	1	0	0	1
lhpO	K23064	410.1	1	1	1	0	0	1
E3.5.1.129	K23150	145.8	0.981	0.97196	1	1.26e-07	0.02804	1
sbp	K23163	470.9	0.858724	0.772964	1	7.93e-06	0.227036	0.999926
fecB	K23181	351.9	0.97	0.9452	1	1.26e-07	0.05476	1
fecD	K23182	404.6	0.594	0.87209	1	4.61e-05	0.12791	1
fecC	K23183	397.8	0.626	0.8187	1	3.44e-05	0.18129	0.999958
fecE	K23184	370.7	0.915	0.873	1	1.01e-06	0.12719	1
fepB	K23185	324.6	0.975401	0.98488	1	2.01e-06	0.01512	1
fepD	K23186	465.4	0.921087	0.8558	1	1.26e-07	0.14423	1
fepG	K23187	422.8	0.947368	0.94062	1	2.39e-06	0.05938	0.999994
fepC	K23188	440.1	0.939704	0.9097	1	1.51e-06	0.09031	1
fhuD	K23227	178.9	0.995538	0.99352	1	3.78e-07	0.00648	0.999999
fhuB	K23228	487.1	0.992268	0.98549	1	1.26e-07	0.01451	0.999998
mntP	K23242	47	0.994102	0.988274	1	0	0.0117	0.999998
isopadh	K23259	266.6	1	1	1	0	0	1
sspC	K23597	188.1	1	1	1	0	0	1
iseA	K23598	42	0.99	0.98077	1	0	0.0192	1
nleC	K23655	518.4	1	1	1	0	0	1
E3.4.24.33	K23743	137.7	0.997	0.99451	1	0	0.00549	1
ohrR	K23775	104.2	0.777189	0.669923	1	4.32e-05	0.33008	0.999693
pipA	K23941	253.7	1	1	1	0	0	1
tpdA	K23980	236.2	0.991686	0.99244	1	7.55e-07	0.00756	1
xoxF	K23995	838.9	0.962	0.93225	1	2.52e-07	0.06775	1
yxeI	K24041	364.8	0.896	0.8553	1	2.64e-06	0.1447	1
ahpC_2	K24119	229.4	0.994959	0.992567	1	7.55e-07	0.007433	0.999997
ahpC_3	K24126	203.8	0.98388	0.9955	1	3.15e-06	0.0045	0.999996
prsW	K24131	39.9	0.999657	0.999314	1	0	0.000686	1
artA	K24447	212.9	1	1	1	0	0	1
patG	K24454	1689.9	1	1	1	0	0	1
mftE	K24697	221.9	0.991	0.987	1	1.26e-07	0.01322	1
ubiU	K24844	278.8	0.99553	0.999102	1	1.13e-06	0.000898	1
ubiV	K24845	113.8	0.99955	0.999102	1	0	0.000898	1
rlhA	K24847	658.7	1	1	1	0	0	1

## Sheet: ST4.microtrait_rules
excel-sheetorder	microtrait_rule-name	microtrait_rule-boolean	notes
1	arsenate->arsenite	('arrA' & 'arrB')
2	selenate->selenite_and	('serA' & 'serB' & 'serC')
3	selenate->selenite_or	('serA' | 'serB' | 'serC')
4	iron reduction	('mtrA' | 'mtrB' | 'mtrC' | 'mtrD' | 'mtrE' | 'mtrF' | 'omcA')
5	iron oxidation	(('pioA' & 'pioB' & 'pioC') | ('foxE' & 'foxY' & 'foxZ') | 'cyc2')
6	R5P->RuBP	('prk')
7	RuBP+CO2->3PG	('rbcS' | 'rbcL')
8	PGAP<->3PG	('pgk')
9	G3P<->PGAP	('gapA.NAD+' | 'gapA.NADP+')
10	G3P+DHAP->FBP	('aldo.classI-1' | 'aldo.classI-2' | 'aldo.classII')	also does E4P+DHAP->SDP
11	FBP->F6P	('fbpI' | 'fbpII' | 'fbpIII' | 'fbpI-sebp' | 'fbpII-sebp')
12	SDP->S7P	('fbpI-sebp' | 'fbpII-sebp')
13	X5P->R5P	('rpiA' | 'rpiB')
14	cc_carboxylation	('RuBP+CO2->3PG')
15	cc_reduction	(('PGAP<->3PG') & ('G3P<->PGAP'))
16	cc_regeneration	(('DHAP<->G3P') & ('G3P+DHAP->FBP') & ('FBP->F6P') & ('SDP->S7P') & ('X5P+E4P<->F6P+G3P') & ('X5P->R5P') & ('R5P->RuBP'))
17	cc_full	(('cc_carboxylation') & ('cc_reduction') & ('cc_regeneration'))
18	cc_key	(('R5P->RuBP') & ('RuBP+CO2->3PG'))
19	cc_CO2fixation	('RuBP+CO2->3PG')
20	pyruvate<->acetyl-CoA+CO2_and	('porA' & 'porB' & 'porD' & 'porG')
21	pyruvate<->acetyl-CoA+CO2_or	('porA' | 'porB' | 'porD' | 'porG')
22	citrate->oxaloacetate+acetyl-CoA_and	('aclA' & 'aclB')
23	citrate->oxaloacetate+acetyl-CoA_or	('aclA' | 'aclB')
24	PEP+HCO3->oxaloacetate	('ppc')
25	oxaloacetate<->malate	('mdh')
26	malate->fumarate	('fumI' | ('fumalpha' & 'fumbeta') | 'fumII')
27	fumarate->succinate-frdNADH_and	('frd.NADHA' & 'frd.NADHB' & 'frd.NADHC' & 'frd.NADHD' & 'frd.NADHE')
28	fumarate->succinate-frdNADH_or	('frd.NADHA' | 'frd.NADHB' | 'frd.NADHC' | 'frd.NADHD' | 'frd.NADHE')
29	fumarate->succinate-sdh_and	('sdhA' & 'sdhB' & 'sdhC' & 'sdhD')
30	fumarate->succinate-sdh_or	('sdhA' | 'sdhB' | 'sdhC' | 'sdhD')
31	fumarate->succinate-frd_and	('frdA' & 'frdB' & 'frdC' & 'frdD')
32	fumarate->succinate-frd_or	('frdA' | 'frdB' | 'frdC' | 'frdD')
33	fumarate->succinate-sdhDarch_and	('sdhD_arch1' & 'sdhD_arch2')
34	fumarate->succinate-sdhDarch_or	('sdhD_arch1' | 'sdhD_arch2')
35	fumarate->succinate	(('fumarate->succinate-frdNADH_and') | ('fumarate->succinate-sdh_and') | ('fumarate->succinate-frd_or') | ('fumarate->succinate-sdhDarch_or'))
36	fumarate->succinate-alt	('sdhA' & 'sdhB' & 'sdhC' & ('sdhD' | 'sdhD_arch1' | 'sdhD_arch2'))
37	succinate<->succinyl-CoA_and	('sucC' & 'sucD')
38	succinate<->succinyl-CoA_or	('sucC' | 'sucD')
39	succinyl-CoA+CO2->alpha-ketoglutarate_and	('oforA' & 'oforB' & 'oforC' & 'oforD')
40	succinyl-CoA+CO2->alpha-ketoglutarate_or	('oforA' | 'oforB' | 'oforC' | 'oforD')
41	alpha-ketoglutarate+CO2->isocitrate	('icd')
42	isocitrate<->citrate	('acnA' | 'acnB')
43	rca_full	(('pyruvate->PEP-ppdk') & ('pyruvate<->acetyl-CoA+CO2_or') & ('citrate->oxaloacetate+acetyl-CoA_or') & ('PEP+HCO3->oxaloacetate') & ('oxaloacetate<->malate') & ('malate->fumarate') & ('fumarate->succinate') & ('succinate<->succinyl-CoA_or') & ('succinyl-CoA+CO2->alpha-ketoglutarate_or') & ('alpha-ketoglutarate+CO2->isocitrate') & ('isocitrate<->citrate'))
	rca_key1	('citrate->oxaloacetate+acetyl-CoA_or')
44	rca_key2	(('succinyl-CoA+CO2->alpha-ketoglutarate_or') & ('citrate->oxaloacetate+acetyl-CoA_or'))
45	rca_CO2fixation	(('PEP+HCO3->oxaloacetate') | ('pyruvate<->acetyl-CoA+CO2_or') | ('succinyl-CoA+CO2->alpha-ketoglutarate_or') | ('succinate<->succinyl-CoA_or'))
46	malate->malyl-CoA_and	('smtA' & 'smtB')	also does succinyl-CoA->succinate
47	malate->malyl-CoA_or	('smtA' | 'smtB')
48	malyl-CoA->glyoxylate+acetyl-CoA	('mcl')
49	acetyl-CoA+HCO3->malonyl-CoA	('bccP' | 'accC' | 'accA' | 'accD' | 'pcc1' | 'pcc2' | 'pcc3' | 'pcc4' | 'pcc5' | 'pcc6')
50	malonyl-CoA->malonate semialdehyde	('mcr' | 'asd1')
51	malonate semialdehyde->3-hydroxypropanoate	('mcr' | 'hpd')
52	3-hydroxypropanoate->3-hydroxypropanoyl-CoA	('hys' | 'acr-hydt')
53	3-hydroxypropanoyl-CoA->acryloyl-CoA	('hydt' | 'acr-hydt')
54	acryloyl-CoA->propionyl-CoA	('acr' | 'acr-hydt')
55	propionyl-CoA+HCO3->S-methylmalonyl-CoA	('bccP' | 'accC' | 'accA' | 'accD' | 'pcc1' | 'pcc2' | 'pcc3' | 'pcc4' | 'pcc5')
56	S-methylmalonyl-CoA<->R-methylmalonyl-CoA	('epi')
57	R-methylmalonyl-CoA<->succinyl-CoA	('mut')
58	succinate->fumarate_full	(('sdhA' & 'sdhB' & 'sdhC' & 'sdhD') | ('frdA' & 'frdB' & 'frdC' & 'frdD') | ('sdhD_arch1' & 'sdhD_arch2'))
59	succinate->fumarate_key	(('sdhA' & 'sdhB' & 'sdhC') | ('frdA' & 'frdB' & 'frdC'))
60	fumarate->malate_full	('fumI' | ('fumalpha' & 'fumbeta') | 'fumII')	link to malate to fumarate
61	propionyl-CoA+glyoxylate->beta-methylmalyl-CoA	('mcl')
62	beta-methylmalyl-CoA->3-methylfumaroyl-CoA	('mfch')
63	3-methylfumaroyl-CoA->3-methylfumaryl-CoA	('mct')
64	3-methylfumaryl-CoA->3S-citramalyl-CoA	('meh')
65	3S-citramalyl-CoA->acetyl-CoA+pyruvate	('mcl')
66	acetyl-CoA->propionyl-CoA	(('acetyl-CoA+HCO3->malonyl-CoA') & ('malonyl-CoA->malonate semialdehyde') & ('malonate semialdehyde->3-hydroxypropanoate') & ('3-hydroxypropanoate->3-hydroxypropanoyl-CoA') & ('3-hydroxypropanoyl-CoA->acryloyl-CoA') & ('acryloyl-CoA->propionyl-CoA'))
67	propionyl-CoA->acetyl-CoA_CO2fixation	(('propionyl-CoA+HCO3->S-methylmalonyl-CoA') & ('S-methylmalonyl-CoA<->R-methylmalonyl-CoA') & ('R-methylmalonyl-CoA<->succinyl-CoA') & ('malate->malyl-CoA_or') & ('succinate->fumarate_key') & ('fumarate->malate_full') & ('malyl-CoA->glyoxylate+acetyl-CoA'))
68	propionyl-CoA->acetyl-CoA_glyoxylateassim	(('propionyl-CoA+glyoxylate->beta-methylmalyl-CoA') & ('beta-methylmalyl-CoA->3-methylfumaroyl-CoA') & ('3-methylfumaroyl-CoA->3-methylfumaryl-CoA') & ('3-methylfumaryl-CoA->3S-citramalyl-CoA') & ('3S-citramalyl-CoA->acetyl-CoA+pyruvate'))
69	3hpb1_full	(('acetyl-CoA->propionyl-CoA') & ('propionyl-CoA->acetyl-CoA_CO2fixation') & ('propionyl-CoA->acetyl-CoA_glyoxylateassim'))
70	3hpb1_CO2fixation	(('propionyl-CoA+HCO3->S-methylmalonyl-CoA') & ('acetyl-CoA+HCO3->malonyl-CoA'))
	3hpb1_key1	(('malonyl-CoA->malonate semialdehyde') & ('acryloyl-CoA->propionyl-CoA'))
71	3hpb1_key2	(('malonyl-CoA->malonate semialdehyde') & ('propionyl-CoA+glyoxylate->beta-methylmalyl-CoA'))
72	CO->CO2	('cdhA' | 'cdhB' | 'cooF' | 'cooS')
73	CO2->formate_and	('fdh.NADP+A' & 'fdh.NADP+B')
74	CO2->formate_or	('fdh.NADP+A' | 'fdh.NADP+B')
75	formate->formyl-THF	('ftfL')
76	formyl-THF->methenyl-THF	('folD')
77	methenyl-THF->methylene-THF	('formyl-THF->methenyl-THF')
78	methylene-THF->methyl-THF	('metF')
79	methyl-THF->methyl-CoFeSP	('acsE')
80	methyl-CoFeSP+CO->acetyl-CoA	('acsB' | ('acsC' & 'acsD'))
81	acetyl-CoA->acetyl-P	('pta1' | 'pta2' | 'pta3')
82	acetyl-P<->acetate	('ackA')
83	CO2->CO	('cooF' | 'cooS')
84	rac_full	(('CO->CO2') & ('CO2->formate_or') & ('formate->formyl-THF') & ('formyl-THF->methenyl-THF') & ('methylene-THF->methyl-THF') & ('methyl-THF->methyl-CoFeSP') & ('methyl-CoFeSP+CO->acetyl-CoA') & ('CO2->CO') & ('acetyl-CoA->acetyl-P') & ('acetyl-P<->acetate'))
85	rac_CO2fixation	('methyl-CoFeSP+CO->acetyl-CoA')
	rac_key1	(('CO2->formate_or') & ('CO2->CO'))
86	rac_key2	(('methyl-CoFeSP+CO->acetyl-CoA') & ('CO2->CO'))
87	succinyl-CoA->succinate semialdehyde	('asd1' | 'asd2')
88	succinate semialdehyde->4-hydroxybutyrate	('ssadh')
89	4-hydroxybutyrate->4-hydroxybutyryl-CoA	('4hbl1' & '4hbl2' & '4hbl3')
90	4-hydroxybutyryl-CoA->crotonoyl-CoA	('abfD')
91	crotonoyl-CoA->3-hydroxybutyryl-CoA	('cch-hbcd')
92	3-hydroxybutyryl-CoA->acetoacetyl-CoA	('cch-hbcd')
93	acetoacetyl-CoA->acetyl-CoA	('atoB')
94	propionyl-CoA->acetyl-CoA-3hp4hb	(('propionyl-CoA+HCO3->S-methylmalonyl-CoA') & ('S-methylmalonyl-CoA<->R-methylmalonyl-CoA') & ('R-methylmalonyl-CoA<->succinyl-CoA') & ('succinyl-CoA->succinate semialdehyde') & ('succinate semialdehyde->4-hydroxybutyrate') & ('4-hydroxybutyrate->4-hydroxybutyryl-CoA') & ('4-hydroxybutyryl-CoA->crotonoyl-CoA') & ('crotonoyl-CoA->3-hydroxybutyryl-CoA') & ('3-hydroxybutyryl-CoA->acetoacetyl-CoA') …
95	3hp4hb_full	(('propionyl-CoA->acetyl-CoA-3hp4hb') & ('acetyl-CoA->propionyl-CoA'))
	3hp4hb_key1	((('4-hydroxybutyryl-CoA->crotonoyl-CoA') & ('crotonoyl-CoA->3-hydroxybutyryl-CoA') & ('3-hydroxybutyryl-CoA->acetoacetyl-CoA') & ('acetoacetyl-CoA->acetyl-CoA')) | (('succinyl-CoA->succinate semialdehyde') & ('succinate semialdehyde->4-hydroxybutyrate') & ('acetyl-CoA+HCO3->malonyl-CoA') & ('acryloyl-CoA->propionyl-CoA')))
96	3hp4hb_key2	(('propionyl-CoA+HCO3->S-methylmalonyl-CoA') & ('malonyl-CoA->malonate semialdehyde') & ('malonate semialdehyde->3-hydroxypropanoate') & ('3-hydroxypropanoate->3-hydroxypropanoyl-CoA') & ('3-hydroxypropanoyl-CoA->acryloyl-CoA') & ('acryloyl-CoA->propionyl-CoA') & ('R-methylmalonyl-CoA<->succinyl-CoA') & ('4-hydroxybutyryl-CoA->crotonoyl-CoA'))
97	3hp4hb_CO2fixation	(('propionyl-CoA+HCO3->S-methylmalonyl-CoA') & ('acetyl-CoA+HCO3->malonyl-CoA'))
98	pyruvate->PEP-pps	('pps')
99	dicarb-4hb_full	(('succinate semialdehyde->4-hydroxybutyrate') & ('4-hydroxybutyrate->4-hydroxybutyryl-CoA') & ('4-hydroxybutyryl-CoA->crotonoyl-CoA') & ('crotonoyl-CoA->3-hydroxybutyryl-CoA') & ('3-hydroxybutyryl-CoA->acetoacetyl-CoA') & ('acetoacetyl-CoA->acetyl-CoA') & ('pyruvate<->acetyl-CoA+CO2_or') & ('pyruvate->PEP-pps') & ('PEP+HCO3->oxaloacetate') & ('oxaloacetate<->malate') & ('malate->fumarate') & ('f…	need to por to pyruvate<->acetyl-CoA+CO2_or here
100	dicarb-4hb_CO2fixation	(('pyruvate<->acetyl-CoA+CO2_or') & ('PEP+HCO3->oxaloacetate'))
101	dicarb-4hb_key	('4-hydroxybutyryl-CoA->crotonoyl-CoA')
102	dicarb-4hb_keyandCO2fixation	(('dicarb-4hb_CO2fixation') & ('dicarb-4hb_key'))
103	co2fix	('cc_key') | ('3hpb1_key1') | ('3hp4hb_key1') | ('dicarb-4hb_CO2fixation') | ('rac_key1') | ('rca_key1')
104	ethanolamine-utilization_and	('eutK' & 'eutL' & 'eutM' & 'eutN' & 'eutS')
105	ethanolamine-utilization_or	('eutK' | 'eutL' | 'eutM' | 'eutN' | 'eutS')
106	CO2concentratingmechanism_and	('ccmK' & 'ccmL' & 'ccmM' & 'ccmN' & 'ccmO')
107	CO2concentratingmechanism_or	('ccmK' | 'ccmL' | 'ccmM' | 'ccmN' | 'ccmO')
108	carboxysome	('ethanolamine-utilization_and' | 'CO2concentratingmechanism_or')
109	citrate->oxaloacetate_and	('citD' & 'citE' & 'citF')
110	citrate->oxaloacetate_or	('citD' | 'citE' | 'citF')
111	pyruvate+HCO3->oxaloacetate	('pyc' & 'pycA' & 'pycB')
112	pyruvate->acetyl-CoA+formate	('pflD')
113	acetyl-CoA->acetoacetyl-CoA	('atoB')
114	acetoacetyl-CoA->3-hydroxybutyryl-CoA-NADP+	('hbd')
115	acetoacetyl-CoA->3-hydroxybutyryl-CoA-NAD+	('cch-hbcd')
116	3-hydroxybutyryl-CoA->crotonoyl-CoA	('crt' | 'echA' | 'fadB' | 'fadJ')
117	crotonoyl-CoA->butyryl-Coa	('bcd')
118	acetoacetyl-CoA->butyryl-CoA	(('acetoacetyl-CoA->3-hydroxybutyryl-CoA-NADP+') & ('3-hydroxybutyryl-CoA->crotonoyl-CoA') & ('crotonoyl-CoA->butyryl-Coa'))
119	butyryl-CoA->butanoyl phosphate	('ptb')
120	butanoyl phosphate->butanoate	('buk')
121	pyruvate->butanoate	(('pyruvate->acetyl-CoA+formate') & ('butanoyl phosphate->butanoate'))
122	butyryl-CoA->butanoate	(('butyryl-CoA->butanoyl phosphate') & ('butanoyl phosphate->butanoate'))
123	pyruvate->butanol	(('pyruvate->acetyl-CoA+formate') & ('butyraldehyde->butanol'))
124	butyraldehyde->butanol	('bdhAB')
125	acetoacetyl-CoA->butanoate	(('acetoacetyl-CoA->butyryl-CoA') & ('butyryl-CoA->butanoate'))
126	acetoacetyl-CoA->butanol	(('acetoacetyl-CoA->butyryl-CoA') & ('butyraldehyde->butanol'))
127	acetoacetyl-CoA->acetoacetate	('atoA' | 'atoD' | 'ydiF')
128	acetoacetate->acetone	('adc')
129	acetone->isopropanol	('isopadh')
130	acetoacetyl-CoA->acetone	(('acetoacetyl-CoA->acetoacetate') & ('acetoacetate->acetone'))
131	acetoacetyl-CoA->isopropanol	(('acetoacetyl-CoA->acetoacetate') & ('acetoacetate->acetone') & ('acetone->isopropanol'))
132	pyruvate->acetolactate	('aclSlarge' | 'aclSsmall_1' | 'aclSsmall_2')
133	acetolactate->acetoin	('alsD')
134	acetoin->butyleneglycol	('butB')
135	pyruvate->butyleneglycol	(('pyruvate->acetolactate') & ('acetolactate->acetoin') & ('acetoin->butyleneglycol'))
136	acetate->acetaldehyde	('aldh')
137	acetaldehyde->ethanol	('adh' | 'adhP' | 'adhE' | 'exaA' | 'yiaY')
138	acetyl-CoA->acetaldehyde	('adhE')
139	pyruvate->acetaldehyde	('pdc')
140	pyruvate->ethanol	(('pyruvate->acetaldehyde') & ('acetaldehyde->ethanol'))
141	pyruvate->lactate	('ldh')
142	xylulose 5-phosphate->acetyl-P+G3P	('xpk')
143	propanoyl phosphate->propionate	('tdcD' | 'pduW')
144	propionate fermentation_succinatepathway	(('R-methylmalonyl-CoA<->succinyl-CoA') & ('S-methylmalonyl-CoA<->R-methylmalonyl-CoA') & ('propanoyl phosphate->propionate'))
145	3PG->2PG	('gpmA' | 'gpmB' | 'gpmI' | 'apgM')
146	2PG->PEP	('eno')
147	pyruvate->acetate	(('poxB') | ('acetyl-CoA->acetate'))
148	pyruvate->propionate+acetate+CO2	('pct')
149	pyruvate->propanoate	('scpC')
150	acetylene->acetaldehyde	('ahy')
151	acetaldehyde->acetyl-CoA	('aldh')
152	acetylene->acetate	(('acetylene->acetaldehyde') & ('acetaldehyde->acetyl-CoA') & ('acetyl-CoA->acetyl-P') & ('acetyl-P<->acetate'))
153	acetylene->ethanol	(('acetylene->acetaldehyde') & ('acetaldehyde->ethanol'))
154	acetylene->acetate+ethanol	(('acetylene->acetate') & ('acetylene->ethanol'))
155	resorcinol->hydroxyhydroquinone	('graA')
156	resorcinol degradation	('resorcinol->hydroxyhydroquinone')
157	glycerol->DHA	('gldA')
158	DHA->DHAP	('dak')
159	glycerol->3-hydroxypropanal_and	('dhbE' & 'dhaC' & 'dhaB')
160	glycerol->3-hydroxypropanal_or	('dhbE' | 'dhaC' | 'dhaB')
161	3-hydroxypropanal->1,3-PDO	('dhaT')
162	glycerol->1,3-PDO	('glycerol->3-hydroxypropanal_or' & '3-hydroxypropanal->1,3-PDO')
163	glycerol degradation	(('glycerol->DHA') | ('glycerol->3-hydroxypropanal_or'))
164	galacturonate->tagaturonate	('uxaC')
165	tagaturonate->altronate	('uxaB')
166	altronate->2Keto3deoxyDgluconate	('uxaA')
167	galacturonate degradation	(('galacturonate->tagaturonate') & ('tagaturonate->altronate') & ('altronate->2Keto3deoxyDgluconate'))
168	galactose->alphagalactose	('galM')
169	alphagalactose->galactose1P	('galK')
170	galactose1P->UDP-galactose	('galT')
171	UDP-galactose->UDP-glucose	('galE' | 'capD')
172	galactose degradation	(('galactose->alphagalactose') & ('alphagalactose->galactose1P') & ('galactose1P->UDP-galactose') & ('UDP-galactose->UDP-glucose'))
173	mannose6P->fructose6P	('manA')
174	mannose degradation	('mannose6P->fructose6P')
175	fucose->fuculose	('fucI')
176	fuculose->fuculose1P	('fucK')
177	fuculose1P->glyceroneP	('fucA')
178	fucose degradation	(('fucose->fuculose') & ('fuculose->fuculose1P') & ('fuculose1P->glyceroneP'))
179	fructose->fructose6P	('scrK' | 'fruK')
180	fructose degradation	('fructose->fructose6P')
181	glucuronate->fructuronate	('uxaC')
182	fructuronate->mannonate	('uxuB')
183	mannonate->2Keto3deoxyDgluconate	('uxuA')
184	glucuronate degradation	('glucuronate->fructuronate' & 'fructuronate->mannonate' & 'mannonate->2Keto3deoxyDgluconate')
185	isocitrate->alpha-ketoglutarate	('icd' | 'hicdh')
186	alpha-ketoglutarate->succinyl-CoA	('pdhD' | 'ogdh' | 'dlst')
187	isocitrate->glyoxylate+succinate	('aceA')
188	glyoxylate->malate	('aceB')
189	oxaloacetate+acetyl-CoA->citrate	('gltA' | 'crs')
190	glyoxylatecycle_full	(('succinate->fumarate_key') & ('fumarate->malate_full') & ('oxaloacetate<->malate') & ('oxaloacetate+acetyl-CoA->citrate') & ('isocitrate<->citrate') & ('isocitrate->glyoxylate+succinate') & ('glyoxylate->malate'))
191	glyoxylatecycle_key	('isocitrate->glyoxylate+succinate')
192	TCA cycle_key	('alpha-ketoglutarate->succinyl-CoA')
193	TCA cycle_full	(('glyoxylatecycle_full') & ('isocitrate->alpha-ketoglutarate') & ('alpha-ketoglutarate->succinyl-CoA') & ('succinate<->succinyl-CoA_or'))
194	TCA cycle_partial	(('glyoxylatecycle_full') | ('isocitrate->alpha-ketoglutarate') | ('alpha-ketoglutarate->succinyl-CoA') | ('succinate<->succinyl-CoA_or'))
195	flgNJSTA	('flgN' | 'flgA')
196	flgMfliA	('flgM' | 'fliA')
197	flhCflhD	('flhC' | 'flhD')
198	fliHIOQPR	('fliH' | 'fliI' | 'fliO' | 'fliQ' | 'fliP' | 'fliR')
199	flhAB	('flhA' | 'flhB' | 'fliRflhB')
200	fliMN	('fliM' | 'fliN')
201	fliFG	('fliF' | 'fliG')
202	fliEflgBC	('fliE' | 'flgB' | 'flgC')
203	flgHI	('flgH' | 'flgI')
204	flgFG	('flgF' | 'flgG')
205	flgEfliKflgD	('flgE' | 'fliK' | 'flgD')
206	flgLK	('flgL' | 'flgK')
207	fliCD	('fliC' | 'fliD')
208	flagella_motor	(('motA') | ('motB'))
209	flagella_nonmotor	(('flgNJSTA') | ('flgMfliA') | ('flhCflhD') | ('fliHIOQPR') | ('flhAB') | ('fliMN') | ('fliFG') | ('fliEflgBC') | ('flgHI') | ('flgFG') | ('flgEfliKflgD') | ('flgLK') | ('fliCD'))
210	flagella	(('flagella_motor') & ('flagella_nonmotor'))
211	trehalose<->maltose	('treS1')
212	maltose->glucose	('malQ' | 'jgt')
213	trehalose degradation	('trehalose<->maltose')
214	maltose degradation	('maltose->glucose')
215	glucose->G6P	('glk')
216	G6P<->F6P	('pgi' | 'pgi_arch' | 'pgi-tal' | 'pgi-pmi')
217	F6P->F16BP	('pfk' | 'pfkA' | 'pfkB' | 'pfkC')
218	F16BP->DHAP+G3P	('fba_2' | 'fba_3' | 'aldo.classI-1' | 'aldo.classI-2' | 'aldo.classII')
219	DHAP<->G3P	('tpi')	change to tpiA
220	3PG<->2PG	('gpmA' | 'gpmB' | 'gpmI' | 'apgM')
221	2PG<->PEP	('eno')
222	PEP->pyruvate	('pyk')
223	oxaloacetate->PEP	('pckA1' | 'pckA2')
224	pyruvate->PEP-ppdk	('ppdK')
225	F16BP->F6P	('fbpI' | 'fbpII' | 'fbpIII' | 'fbpI-sebp')
226	G6P->6PGL	('gpd')
227	6PGL->6PG	('pgl_1' | 'pgl_2')
228	6PG->KDPG	('edd')
229	KDPG->pyruvate+G3P	('eda' | 'dgaF' | 'kdpgA')
230	lactate->pyruvate_and	('lldE' & 'lldF' & 'lldG')
231	lactate->pyruvate_or	('lldE' | 'lldF' | 'lldG')
232	6PG->5RP	('pgd')
233	5RP<->X5P	('rpe')
234	5RP<->R5P	('rpiA' | 'rpiB')
235	G3P+S7P<->E4P+F6P	('tal')
236	X5P+E4P<->F6P+G3P	('tkt')	also does R5P+X5P<->G3P+S7P
237	R5P+X5P<->G3P+S7P	('X5P+E4P<->F6P+G3P')
238	glycolysis-EMP_full	('glucose->G6P') & ('G6P<->F6P') & ('F6P->F16BP') & ('G3P<->PGAP') & ('PGAP<->3PG') & ('3PG<->2PG') & ('2PG<->PEP') & ('PEP->pyruvate')
239	glycolysis-ED_full	('glucose->G6P') & ('G6P->6PGL') & ('6PGL->6PG') & ('6PG->KDPG') & ('KDPG->pyruvate+G3P')
240	glycolysis	('glycolysis-EMP_full' | 'glycolysis-ED_full')
241	gluconeogenesis_full	(('pyruvate->PEP-ppdk' | 'oxaloacetate->PEP') & ('2PG<->PEP') & ('3PG<->2PG') & ('PGAP<->3PG') & ('G3P<->PGAP') & ('F16BP->F6P') & ('G6P<->F6P'))
242	oxppp	('G6P->6PGL') & ('6PGL->6PG') & ('6PG->5RP')
243	nonoxppp	('5RP<->X5P') & ('5RP<->R5P') & ('X5P+E4P<->F6P+G3P') & ('G3P+S7P<->E4P+F6P')
244	ppp	('oxppp' & 'nonoxppp')
245	5RP->PRPP	('prs')
246	GH1	('GH1')
247	GH2	('GH2')
248	GH3	('GH3')
249	GH4	('GH4')
250	GH5	('GH5')
251	GH6	('GH6')
252	GH7	('GH7')
253	GH8	('GH8')
254	GH9	('GH9')
255	GH10	('GH10')
256	GH11	('GH11')
257	GH12	('GH12')
258	GH16	('GH16')
259	GH18	('GH18')
260	GH19	('GH19')
261	GH20	('GH20')
262	GH23	('GH23')
263	GH26	('GH26')
264	GH27	('GH27')
265	GH30	('GH30')
266	GH31	('GH31')
267	GH36	('GH36')
268	GH39	('GH39')
269	GH43	('GH43')
270	GH44	('GH44')
271	GH45	('GH45')
272	GH48	('GH48')
273	GH51	('GH51')
274	GH52	('GH52')
275	GH54	('GH54')
276	GH62	('GH62')
277	GH74	('GH74')
278	GH79	('GH79')
279	GH97	('GH97')
280	GH98	('GH98')
281	GH124	('GH124')
282	GH110	('GH110')
283	GH113	('GH113')
284	GH116	('GH116')
285	GH120	('GH120')
286	GH134	('GH134')
287	acetyl-CoA+methylH4MPT->methylH4SPT+CO_full	('cdhC' & 'acsC' & 'acsD')
288	acetyl-CoA+methylH4MPT->methylH4SPT+CO_partial	('cdhC' | 'acsC' | 'acsD')
289	acetyl-P->acetyl-CoA	('pta1' | 'pta2')
290	acetate->acetyl-CoA	('acetyl-P<->acetate' & 'acetyl-P->acetyl-CoA')
291	acetate->acetyl-CoA-acss	('acss')
292	methylH4SPT+CoM->methylCoM+methylH4MPT_and	('tmtrA' & 'tmtrB' & 'tmtrC' & 'tmtrD' & 'tmtrE' & 'tmtrF' & 'tmtrG' & 'tmtrH')
293	methylH4SPT+CoM->methylCoM+methylH4MPT_or	('tmtrA' | 'tmtrB' | 'tmtrC' | 'tmtrD' | 'tmtrE' | 'tmtrF' | 'tmtrG' | 'tmtrH')
294	methylCoM+CoB->CoM+CH4_and	('mcrA' & 'mcrB' & 'mcrG' & 'mcr2') | ('mcrC' & 'mcrD')
295	methylCoM+CoB->CoM+CH4_or	('mcrA' | 'mcrB' | 'mcrG' | 'mcr2' | 'mcrC' | 'mcrD')
296	methanogenesis_key	('mcrA' | 'mcrB' | 'mcrG')
297	acetate->CH4	(('acetate->acetyl-CoA' & 'cdhC') & ('methylH4SPT+CoM->methylCoM+methylH4MPT_or') & ('methylCoM+CoB->CoM+CH4_or'))
298	acetoclastic methanogenesis_full	('acetyl-P<->acetate' & 'acetyl-P->acetyl-CoA' & 'acetyl-CoA+methylH4MPT->methylH4SPT+CO_full' & 'methylH4SPT+CoM->methylCoM+methylH4MPT_or' & 'methylCoM+CoB->CoM+CH4_or')
299	acetoclastic methanogenesis_partial	('acetyl-P<->acetate' | 'acetyl-P->acetyl-CoA' | 'acetyl-CoA+methylH4MPT->methylH4SPT+CO_full' | 'methylH4SPT+CoM->methylCoM+methylH4MPT_or' | 'methylCoM+CoB->CoM+CH4_or')
300	acetoclastic methanogenesis_key	('acetyl-CoA+methylH4MPT->methylH4SPT+CO_partial')
301	MF+CO2->formylMF_and	(('fwdA' & 'fwdB' & 'fwdC' & 'fwdD' & 'fwdF' & 'fwdH') | ('fwdG' & 'fwdE'))
302	MF+CO2->formylMF_or	('fwdA' | 'fwdB' | 'fwdC' | 'fwdD' | 'fwdF' | 'fwdH' | 'fwdG' | 'fwdE')
303	formylMF+H4MPT->MF+formylH4MPT	('ftr')
304	formylH4MPT->methenylH4MPT	('mtdch')
305	methenylH4MPT->methyleneH4MPT	('hmd')
306	methyleneH4MPT->methyl-H4SPT	('mer')
307	hydrogenotrophic methanogenesis_full	(('MF+CO2->formylMF_or') & ('formylMF+H4MPT->MF+formylH4MPT') & ('formylH4MPT->methenylH4MPT') & ('methenylH4MPT->methyleneH4MPT'))
	hydrogenotrophic methanogenesis_full1	(('MF+CO2->formylMF_or') & ('formylMF+H4MPT->MF+formylH4MPT') & ('formylH4MPT->methenylH4MPT') & ('methenylH4MPT->methyleneH4MPT') & ('methyleneH4MPT->methyl-H4SPT'))
308	hydrogenotrophic methanogenesis_partial	(('MF+CO2->formylMF_or') | ('formylMF+H4MPT->MF+formylH4MPT') | ('formylH4MPT->methenylH4MPT') | ('methenylH4MPT->methyleneH4MPT'))
	hydrogenotrophic methanogenesis_partial1	(('MF+CO2->formylMF_or') | ('formylMF+H4MPT->MF+formylH4MPT') | ('formylH4MPT->methenylH4MPT') | ('methenylH4MPT->methyleneH4MPT') | ('methyleneH4MPT->methyl-H4SPT'))
309	hydrogenotrophic methanogenesis_key	(('methyleneH4MPT->methyl-H4SPT') | ('methylH4SPT+CoM->methylCoM+methylH4MPT_or') | ('methylCoM+CoB->CoM+CH4_or'))
310	methanol->methylCoM_and	('mtaB' & 'mtaC')
311	methanol->methylCoM_or	('mtaB' | 'mtaC')
312	methanol->methane methanogenesis	('methanol->methylCoM_or' & 'methylCoM+CoB->CoM+CH4_or')
313	hydrogenotrophic methanogenesis	('ftr' & 'mtdch' & 'mtd' & 'mer')
314	TMAO->trimethylamine	('torA' | 'torZ' | 'torC' | 'torY')
315	trimethylamine->methylCoM-direct_and	('mtbA' & 'mttB' & 'mttC')
316	trimethylamine->methylCoM-direct_or	('mtbA' | 'mttB' | 'mttC')
317	dimethylamine->methylCoM-direct_and	('mtbA' & 'mtbB' & 'mtbC')
318	dimethylamine->methylCoM-direct_or	('mtbA' | 'mtbB' | 'mtbC')
319	monomethylamine->methylCoM-direct_and	('mtbA' & 'mtmB' & 'mtmC')
320	monomethylamine->methylCoM-direct_or	('mtbA' | 'mtmB' | 'mtmC')
321	trimethylamine->dimethylamine	('dmd-tmd')
322	dimethylamine->monomethylamine	('dmd-tmd')
323	dimethylamine->methylCoM	(('dimethylamine->methylCoM-direct_or') | (('dimethylamine->monomethylamine') & ('monomethylamine->methylCoM-direct_or')))
324	trimethylamine->methylCoM	(('trimethylamine->methylCoM-direct_or') | (('trimethylamine->dimethylamine') & ('dimethylamine->methylCoM')))
325	methanethiol->methylCoM	('mmtsA')
326	serine pathway	('glyA' | 'agxt' | 'hprA' | 'mtkB')
327	PHB cycle	('phbC' | 'phaZ' | 'phaZ2')
328	H4MPT pathway	('fae' | 'mtdch')
329	H4F pathway	('fchA')
330	RuMP pathway	('hxlA' | 'hps-phi')
331	CH4->CH3OH	(('mmoX' | 'mmoY' | 'mmoZ' | 'mmoC' | 'mmoD') | ('pmoA-amoA' | 'pmoB-amoB' | 'pmoC-amoC'))
332	CH3OH->CH2O	('mxaF' | 'mxaJ' | 'mxaG' | 'mxaI' | 'mxaA' | 'mxaC' | 'mxaD' | 'mxaK' | 'mxaL' | 'xoxF')
333	methylene-H4F->methenyl-H4F	('mtdA' | 'folD')
334	methenyl-H4F->formyl-H4F	('fchA')
335	formyl-H4F->HCOO-	('ftfL')
336	HCOO->CO2	('fdhAF420' | 'fdhBF420')
337	CH2O->HCOO-	('fdhA')
338	CH2O->5,10methylene-THMPT	('fae' | 'fae-hps')
339	5,10methylene-THMPT->5,10methenyl-THMPT	('mtdA' | 'mtdB' | 'hmd')
340	formyl-MFR->HCOO-	(('fwdA' & 'fwdB' & 'fwdC' & 'fwdD') & ('fwdE' & 'fwdF' & 'fwdG' & 'fwdH'))
341	methane oxidation pmo_full	('pmoA-amoA' | 'pmoB-amoB' | 'pmoC-amoC')
342	methane oxidation mmo_full	('mmoX' | 'mmoY' | 'mmoZ' | 'mmoC' | 'mmoD')
343	methanol->formaldehyde	('mxaF' | 'mxaJ' | 'mxaG' | 'mxaI' | 'mxaR' | 'mxaA' | 'mxaC' | 'mxaD' | 'mxaK' | 'mxaL' | 'xoxF')
344	narGHI_and	('narG' & 'narH' & 'narI_dsrM')
345	narGHI_or	('narG' | 'narH' | 'narI_dsrM')
346	napAB_and	('napA' & 'napB')
347	napAB_or	('napA' | 'napB')
348	nirSK_and	('nirS' & 'nirK')
349	nirSK_or	('nirS' | 'nirK')
350	nirBC_and	('nirB' & 'nirC')
351	nirBC_or	('nirB' | 'nirC')
352	norBC_and	('norB' & 'norC')
353	norBC_or	('norB' | 'norC')
354	norVW_and	('norV' & 'norW')
355	norVW_or	('norV' | 'norW')
356	nasAB_and	('nasA' & 'nasB')
357	nasAB_or	('nasA' | 'nasB')
358	hzsABC_and	('hzsA' & 'hzsB' & 'hzsC')
359	hzsABC_or	('hzsA' | 'hzsB' | 'hzsC')
360	nifDKH_and	('nifD' & 'nifK' & 'nifH')
361	nifDKH_or	('nifD' & 'nifK' & 'nifH')
362	pmoamoABC_and	('pmoA-amoA' & 'pmoB-amoB' & 'pmoC-amoC')
363	pmoamoABC_or	('pmoA-amoA' | 'pmoB-amoB' | 'pmoC-amoC')
364	vnfDGKH_and	('vnfD' & 'vnfG' & 'vnfK' & 'vnfH')
365	vnfDGKH_or	('vnfD' | 'vnfG' | 'vnfK' | 'vnfH')
366	nitrate->nitrite_dissimilatory_full	('narGHI_and' | 'napAB_and')
367	nitrate->nitrite_dissimilatory_partial	(('narG' | 'narH' | 'narI_dsrM') | ('napA' | 'napB'))
368	nitrite->nitricoxide_full	('nirS' & 'nirK')
369	nitrite->nitricoxide_partial	('nirS' | 'nirK')
370	nitricoxide->nitrousoxide_full	(('norBC_and') | ('norVW_and'))
371	nitricoxide->nitrousoxide_partial	(('norBC_or') | ('norVW_or'))
372	nitrousoxide->dinitrogen	('nosZ')
373	nitrate->nitricoxide_complete	(('nitrate->nitrite_dissimilatory_full') & ('nitrite->nitricoxide_partial'))
374	nitrate->nitrousoxide_complete	(('nitrate->nitricoxide_complete') | ('nitricoxide->nitrousoxide_full'))
375	nitrate->dinitrogen_complete	(('nitrate->nitrousoxide_complete') & ('nitrousoxide->dinitrogen'))
376	nitrite->nitrate_full	('narG' & 'narH')
377	nitrite->nitrate_partial	('narG' | 'narH')
378	nitrate->nitrite_assimilatory_full	(('nasAB_and') | ('narB'))
379	nitrate->nitrite_assimilatory_partial	(('nasAB_or') | ('narB'))
380	nitrite->ammonia_dissimilatory_full	(('nirB' & 'nirD' & 'nrfA' & 'nrfH') | ('nirA'))
381	nitrite->ammonia_dissimilatory_partial	(('nirB' | 'nirD' | 'nrfA' | 'nrfH') | ('nirA'))
382	ammonia->hydroxylamine_full	('pmoamoABC_and')
383	ammonia->hydroxylamine_partial	('pmoamoABC_or')
384	hydroxylamine->nitrite	('hao')
385	nitrite+ammonia->hydrazine_full	(('hzsABC_and'))
386	nitrite+ammonia->hydrazine_partial	(('hzsABC_or'))
387	hydrazine->dinitrogen	('hdh')
388	dinitrogen->ammonia_full	(('nifD' & 'nifK' & 'nifH' & 'anfG') | ('vnfDGKH_and'))
389	dinitrogen->ammonia_partial	(('nifD' | 'nifK' | 'nifH' | 'anfG') | ('vnfDGKH_or'))
	dinitrogen->ammonia_key	('nifH' | 'vnfH')
390	nitrate reduction_full	(('nitrate->nitrite_dissimilatory_full'))
391	nitrate reduction_partial	(('nitrate->nitrite_dissimilatory_partial'))
392	denitrification:nitrite->dinitrogen_full	(('nitrite->nitricoxide_full') & ('nitricoxide->nitrousoxide_full') & ('nitrousoxide->dinitrogen'))
393	denitrification:nitrite->dinitrogen_partial	(('nitrite->nitricoxide_partial') & ('nitricoxide->nitrousoxide_partial') & ('nitrousoxide->dinitrogen'))
394	denitrification:nitrate->nitrite_full	('nitrate reduction_full')
395	denitrification:nitrate->nitrite_partial	(('narG' | 'narH' | 'narI_dsrM') | ('napA' | 'napB'))
396	denitrification:nitrate->nitric oxide_full	(('denitrification:nitrate->nitrite_full') & ('nitrite->nitricoxide_full'))
397	denitrification:nitrate->nitric oxide_partial	(('denitrification:nitrate->nitrite_partial') & ('nitrite->nitricoxide_partial'))
398	denitrification:nitrate->nitrous oxide_full	(('denitrification:nitrate->nitrite_full') & ('nitrite->nitricoxide_full') & ('nitricoxide->nitrousoxide_full'))
399	denitrification:nitrate->nitrous oxide_partial	(('denitrification:nitrate->nitrite_partial') & ('nitrite->nitricoxide_partial') & ('nitricoxide->nitrousoxide_partial'))
400	denitrification:nitrate->dinitrogen_full	(('denitrification:nitrate->nitrite_full') & ('nitrite->nitricoxide_full') & ('nitricoxide->nitrousoxide_full') & ('nitrousoxide->dinitrogen'))
401	denitrification:nitrate->dinitrogen_partial	(('denitrification:nitrate->nitrite_partial') & ('nitrite->nitricoxide_partial') & ('nitricoxide->nitrousoxide_partial') & ('nitrousoxide->dinitrogen'))
402	nitrogen fixation_full	(('dinitrogen->ammonia_full'))
403	nitrogen fixation_partial	(('dinitrogen->ammonia_partial'))
	nitrogen fixation_key	(('dinitrogen->ammonia_key'))
404	ammonia oxidation to nitrite_full	(('ammonia->hydroxylamine_full') & ('hydroxylamine->nitrite'))
405	ammonia oxidation to nitrite_partial	(('ammonia->hydroxylamine_partial') | ('hydroxylamine->nitrite'))
406	nitrite oxidation_full	('nitrite->nitrate_full')
407	nitrite oxidation_partial	('nitrite->nitrate_partial')
408	comammox_full	('ammonia oxidation to nitrite_full' & 'nitrite oxidation_full')
409	comammox_partial	('ammonia oxidation to nitrite_partial' & 'nitrite oxidation_partial')
410	ammonia oxidation to dinitrogen_full	(('hzsA' & 'hzsB' & 'hzsC') & ('hdh'))
411	ammonia oxidation to dinitrogen_partial	(('hzsA' | 'hzsB' | 'hzsC') & ('hdh'))
412	anammox_full	('ammonia oxidation to dinitrogen_full')
413	anammox_partial	('ammonia oxidation to dinitrogen_partial')
414	assimilatory nitrite reduction	('nirA')
415	dissimilatory nitrite reduction_full	('nirB' & 'nirD' & 'nrfA' & 'nrfH')
416	dissimilatory nitrite reduction_partial	('nirB' | 'nirD' | 'nrfA' | 'nrfH')
417	assimilatory nitrate reduction_full	('nitrate->nitrite_assimilatory_full' & 'assimilatory nitrite reduction')
418	assimilatory nitrate reduction_partial	('nitrate->nitrite_assimilatory_partial' & 'assimilatory nitrite reduction')
419	dissimilatory nitrate reduction_full	('nitrate->nitrite_dissimilatory_full' & 'dissimilatory nitrite reduction_full')
420	dissimilatory nitrate reduction_partial	('nitrate->nitrite_dissimilatory_partial' & 'dissimilatory nitrite reduction_full')
421	ammonia assimilation to glutamate-GDH	('gudB' | 'gdh2' | 'gdhA_1' | 'gdhA_2')
422	ammonia assimilation to glutamate-GS_GOGAT	(('gltB' | 'gltD' | 'gltS1') & 'glnA')
423	ammonia assimilation to glutamate	('ammonia assimilation to glutamate-GDH') | ('ammonia assimilation to glutamate-GS_GOGAT')
424	ammonia assimilation to glutamine-GS	('glnA')
425	glutamine to aspartate	('aspB' | 'aspC' | 'yhdR')
426	phosphatase	('phoA' | 'phoD' | 'phoN' | 'aphA')
427	phytase	('phy' | 'appA')
428	oxygenic photosystem I core	('psaA' | 'psaB' | 'psaC' | 'psaD' | 'psaE' | 'psaF')
429	oxygenic photosystem I side	('psaI' | 'psaJ' | 'psaK' | 'psaL' | 'psaM' | 'psaX')
430	oxygenic photosystem I	(('oxygenic photosystem I core') & ('oxygenic photosystem I side'))
431	oxygenic photosystem II core	('psbA' | 'psbB' | 'psbC' | 'psbD' | 'psbE' | 'psbF')
432	oxygenic photosystem II side	('psbH' | 'psbI' | 'psbJ' | 'psbK' | 'psbL' | 'psbM' | 'psbO' | 'psbP' | 'psbT' | 'psbY' | 'psbZ' | 'psb27' | 'psb28')
433	oxygenic photosystem II sidecyano	('psbU' | 'psbV' | 'psbX' | 'psb28-2')
434	oxygenic photosystem II	(('oxygenic photosystem II core') & (('oxygenic photosystem II side') | ('oxygenic photosystem II sidecyano')))
	cytochrome b6f	('petA' & 'petB' & 'petC' & 'petD')
435	cytochrome b6f_or	('petA' | 'petB' | 'petC' | 'petD' | 'petG' | 'petL' | 'petM' | 'petN')
	photosynthetic ETC	('petE' & 'petF' & 'petH' & 'petJ')
436	photosynthetic ETC_or	('petE' | 'petF' | 'petH' | 'petJ')
437	anoxygenic photosystem II RC	('pufL' | 'pufM' | 'puhA' | 'pufX' | 'pufC')
438	anoxygenic photosystem II LH B870	('pufA' | 'pufB')
439	anoxygenic photosystem II LH B800B850	('pucA' | 'pucB')
440	anoxygenic photosystem II LH	(('anoxygenic photosystem II LH B870') | ('anoxygenic photosystem II LH B800B850'))
441	anoxygenic photosystem I RC	('pscA' | 'pscB' | 'pscC' | 'pscD')
442	anoxygenic photosystem I bacteriochlorophyll A	('fmoA')
443	anoxygenic photosystem I chlorosome	('csmA' | 'csmB' | 'csmC' | 'csmD' | 'csmE' | 'csmF' | 'csmH' | 'csmI' | 'csmJ' | 'csmX')
444	phycobilisome allophycocyanin	('apcA' | 'apcB' | 'apcC' | 'apcD' | 'apcE' | 'apcF')
445	phycobilisome phycocyanin	('cpcA' | 'cpcB' | 'cpcC' | 'cpcD' | 'cpcE' | 'cpcF' | 'rpcG' | 'cpcG')
446	phycobilisome phycoerythrocyanin	('pecA' | 'pecB' | 'pecC' | 'pecE' | 'pecF')
447	phycobilisome phycoerythrin	('cpeA' | 'cpeB' | 'cpeC' | 'cpeD' | 'cpeE' | 'cpeR' | 'cpeS' | 'cpeT' | 'cpeU' | 'cpeY' | 'cpeZ')
448	phycobilisome chlorophyll a/b	('pcbA' | 'pcbB' | 'pcbC' | 'pcbD' | 'pcbE' | 'pcbF' | 'pcbG' | 'pcbH')
449	protoporphyrin IX->Mg protoporphyrin IX	('bchH')
450	Mg protoporphyrin IX->Mg protoporphyrin IX 13-monomethyl ester	('bchM')
451	Mg protoporphyrin IX 13-monomethyl ester->divinyl protochlorophyllide	('bchE' | 'chlE')
452	divinyl protochlorophyllide->protochlorophyllide	('bciB' | 'bchJ')
453	protochlorophyllide->chlorophyllide a	('por' | 'chlL')
454	chlorophyllide a->8ethyl12methyl3vinyl bacteriochlorophyllide d	('bciC')
455	chlorophyllide a->3hydroxyethyl bacteriochlorophyllide a	('bchX' | 'bchF')
456	8ethyl12methyl3vinyl bacteriochlorophyllide d->bacteriochlorophyllide d	('bchV')
457	3hydroxyethyl bacteriochlorophyllide a->bacteriochlorophyllide a	('bchC')
458	bacteriochlorophyllide d->bacteriochlorophyllide c	('bchU')
459	bacteriochlorophyllide d->bacteriochlorophyll d	('bchK')
460	bacteriochlorophyllide c->bacteriochlorophyll c	('bchK')
461	bacteriochlorophyllide c->bacteriochlorophyll e	('bciD')
462	bacteriochlorophyllide a->geranylgeranyl bacteriochlorophyllide a	('bchG')
463	bacteriochlorophyllide b->geranylgeranyl bacteriochlorophyllide b	('bchG')
464	oxygenic chlorophyll a synthesis	('bchG')
465	geranylgeranyl bacteriochlorophyllide a->bacteriochlorophyll a	('bchP')
466	geranylgeranyl bacteriochlorophyllide b->bacteriochlorophyll b	('bchP')
467	bacteriochlorophyllide a->bacteriochlorophyll a	(('bacteriochlorophyllide a->geranylgeranyl bacteriochlorophyllide a') & ('geranylgeranyl bacteriochlorophyllide a->bacteriochlorophyll a'))
468	bacteriochlorophyllide b->bacteriochlorophyll b	(('bacteriochlorophyllide b->geranylgeranyl bacteriochlorophyllide b') & ('geranylgeranyl bacteriochlorophyllide b->bacteriochlorophyll b'))
469	protoporphyrin IX->chlorophyllide a	(('protoporphyrin IX->Mg protoporphyrin IX') & ('Mg protoporphyrin IX->Mg protoporphyrin IX 13-monomethyl ester') & ('Mg protoporphyrin IX 13-monomethyl ester->divinyl protochlorophyllide') & ('divinyl protochlorophyllide->protochlorophyllide') & ('protochlorophyllide->chlorophyllide a'))
470	chlorophyllide a->bacteriochlorophyllide d	('bciC' & 'bchV')
471	chlorophyllide a->bacteriochlorophyllide a	(('bchX' | 'bchF') & 'bchC')
472	protoporphyrin IX->bacteriochlorophyllide d	(('protoporphyrin IX->chlorophyllide a') & ('chlorophyllide a->bacteriochlorophyllide d'))
473	protoporphyrin IX->bacteriochlorophyllide a	(('protoporphyrin IX->chlorophyllide a') & ('chlorophyllide a->bacteriochlorophyllide a'))
474	bacteriochlorophyllide d->bacteriochlorophyll c	(('bacteriochlorophyllide d->bacteriochlorophyllide c') & ('bacteriochlorophyllide c->bacteriochlorophyll c'))
475	bacteriochlorophyllide d->bacteriochlorophyll e	(('bacteriochlorophyllide d->bacteriochlorophyllide c') & ('bacteriochlorophyllide c->bacteriochlorophyll e'))
476	bacteriochlorophyll a synthesis	(('protoporphyrin IX->chlorophyllide a') & ('chlorophyllide a->bacteriochlorophyllide a') & ('bacteriochlorophyllide a->bacteriochlorophyll a'))
477	bacteriochlorophyll b synthesis	(('protoporphyrin IX->chlorophyllide a') & ('chlorophyllide a->bacteriochlorophyllide a') & ('bacteriochlorophyllide a->bacteriochlorophyll a'))
478	bacteriochlorophyll c synthesis	(('protoporphyrin IX->chlorophyllide a') & ('chlorophyllide a->bacteriochlorophyllide d') & ('bacteriochlorophyllide d->bacteriochlorophyll c'))
479	bacteriochlorophyll d synthesis	(('protoporphyrin IX->chlorophyllide a') & ('chlorophyllide a->bacteriochlorophyllide d') & ('bacteriochlorophyllide d->bacteriochlorophyll d'))
480	bacteriochlorophyll e synthesis	(('protoporphyrin IX->chlorophyllide a') & ('chlorophyllide a->bacteriochlorophyllide d') & ('bacteriochlorophyllide d->bacteriochlorophyll e'))
481	GGPP->phytoene	('crtB')
482	phytoene->phytofluene	('crtI' | 'crtP')
483	phytofluene->zeta carotene	('crtI' | 'crtP')
484	zeta carotene->neurosporene	('crtI' | 'crtQ')
485	neurosporene->hydroxy-neurosporene	('crtC')
486	hydroxy-neurosporene->demethyl-spheroidene	('crtD')
487	demethyl-spheroidene->spheroidene	('crtF')
488	spheroidene->spheroidenone	('crtA')
489	neurosporene->lycopene	('crtI' | 'crtQ')
490	lycopene->gamma carotene	('crtY' | 'crtL1' | 'cruA')
491	gamma carotene->beta carotene	('crtY' | 'crtL1' | 'cruA')
492	beta carotene->beta isorenieratene	('crtU')
493	beta isorenieratene->isorenieratene	('crtU')
494	gamma carotene->chlorobactene	('crtU')
495	lycopene->tetrahydro-spirilloxanthin	('crtC' & 'crtF')
496	lycopene->spirilloxanthin	('crtC' & 'crtD' & 'crtF')
497	lycopene->okenone	('crtU')
498	neurosporene->spheroidene	('crtC' & 'crtD' & 'crtF')
499	neurosporene biosynthesis	(('GGPP->phytoene') & ('phytoene->phytofluene') & ('phytofluene->zeta carotene') & ('zeta carotene->neurosporene'))
500	lycopene biosynthesis	(('neurosporene biosynthesis') & ('neurosporene->lycopene'))
501	gammacarotene biosynthesis	(('lycopene biosynthesis') & ('lycopene->gamma carotene'))
502	betacarotene biosynthesis	(('gammacarotene biosynthesis') & ('gamma carotene->beta carotene'))
503	betaisorenieratene biosynthesis	(('betacarotene biosynthesis') & ('beta carotene->beta isorenieratene'))
504	isorenieratene biosynthesis	(('betaisorenieratene biosynthesis') & ('beta isorenieratene->isorenieratene'))
505	chlorobactene biosynthesis	(('gammacarotene biosynthesis') & ('gamma carotene->chlorobactene'))
506	spirilloxanthin biosynthesis	(('lycopene biosynthesis') & (('lycopene->tetrahydro-spirilloxanthin') | ('lycopene->spirilloxanthin')))
507	okenone biosynthesis	(('lycopene biosynthesis') & ('lycopene->okenone'))
508	spheroidenone biosynthesis	(('neurosporene biosynthesis') & ('neurosporene->spheroidene') & ('spheroidene->spheroidenone'))
509	diaponeurosporene biosynthesis	('crtM' | 'crtN')
510	hydroxyspheroidenone biosynthesis	('neurosporene biosynthesis') & ('neurosporene->hydroxy-neurosporene')
511	ggt	('ggt')
512	pepA_M17	('pepA_M17')
513	pepA_M42	('pepA_M42')
514	pepN	('pepN')
515	pepT	('pepT')
516	pip	('pip')
517	pepP	('pepP')
518	map	('map')
519	dmpA	('dmpA')
520	pepD_M20	('pepD_M20')
521	pepD_S1	('pepD_S1')
522	pepQ	('pepQ')
523	pepX	('pepX')
524	dcp	('dcp')
525	cpg	('cpg')
526	ldcA	('ldcA')
527	E3.4.17.19	('E3.4.17.19')
528	pcp	('pcp')
529	iadA	('iadA')
530	yqgT	('yqgT')
531	sspA	('sspA')
532	E3.4.21.50	('E3.4.21.50')
533	lon	('lon')
534	iga_hap	('iga_hap')
535	iga_zmpA	('iga_zmpA')
536	ptrB	('ptrB')
537	clpP	('clpP')
538	ptrA	('ptrA')
539	prlC	('prlC')
540	hslV	('hslV')
541	bepA	('bepA')
542	cpaA	('cpaA')
543	hofD	('hofD')
544	pilD	('pilD')
545	lepB	('lepB')
546	lspA	('lspA')
547	psmA	('psmA')
548	psmB	('psmB')
549	hyaD	('hyaD')
550	prc	('prc')
551	hflB	('hflB')
552	lonB	('lonB')
553	hhoB	('hhoB')
554	lonH	('lonH')
555	degP	('degP')
556	degQ	('degQ')
557	sppA	('sppA')
558	sohB	('sohB')
559	ydgD	('ydgD')
560	pfpI	('pfpI')
561	E3.4.11.10	('E3.4.11.10')
562	pepE	('pepE')
563	cpt	('cpt')
564	gpr	('gpr')
565	spoIIGA	('spoIIGA')
566	preP	('preP')
567	dacC	('dacC')
568	dacB	('dacB')
569	vanY	('vanY')
570	mepA	('mepA')
571	pbpG	('pbpG')
572	pqqL	('pqqL')
573	pepO	('pepO')
574	loiP	('loiP')
575	pepB	('pepB')
576	flaK	('flaK')
577	prtC_M10	('prtC_M10')
578	prtC_U32	('prtC_U32')
579	hycI	('hycI')
580	ypdF	('ypdF')
581	pgtE	('pgtE')
582	tpr	('tpr')
583	yopJ	('yopJ')
584	yopT	('yopT')
585	pepF	('pepF')
586	E3.4.17.14	('E3.4.17.14')
587	vanX	('vanX')
588	lasA	('lasA')
589	lef	('lef')
590	scpA	('scpA')
591	pepDA	('pepDA')
592	tri	('tri')
593	nprB	('nprB')
594	mtfA	('mtfA')
595	rseP	('rseP')
596	cps	('cps')
597	iaaA	('iaaA')
598	wprA	('wprA')
599	isp	('isp')
600	bpr	('bpr')
601	epr	('epr')
602	sipW	('sipW')
603	avrRpt2	('avrRpt2')
604	avrPphB	('avrPphB')
605	icsP	('icsP')
606	mepS	('mepS')
607	trf2_3	('trf2_3')
608	aprE1	('aprE1')
609	aprE2	('aprE2')
610	vpr	('vpr')
611	dppA	('dppA')
612	erfK	('erfK')
613	yydH	('yydH')
614	cwlK	('cwlK')
615	aprX	('aprX')
616	frvX	('frvX')
617	sprE	('sprE')
618	ptpA	('ptpA')
619	vanXY	('vanXY')
620	ampH	('ampH')
621	cwlS	('cwlS')
622	lytF	('lytF')
623	lytE	('lytE')
624	gluP	('gluP')
625	ynhG	('ynhG')
626	ybiS	('ybiS')
627	ycfS	('ycfS')
628	mepH	('mepH')
629	mepM	('mepM')
630	mpl	('mpl')
631	ampS	('ampS')
632	ywaD	('ywaD')
633	E3.4.11.24	('E3.4.11.24')
634	zmp1	('zmp1')
635	alpha-LP	('alpha-LP')
636	zmpA	('zmpA')
637	zmpB_M26	('zmpB_M26')
638	zmpB_M4	('zmpB_M4')
639	nisP	('nisP')
640	tet	('tet')
641	sgcX	('sgcX')
642	ykfC	('ykfC')
643	E3.4.24.32	('E3.4.24.32')
644	bapA	('bapA')
645	E3.4.21.121	('E3.4.21.121')
646	impA	('impA')
647	pbp4b	('pbp4b')
648	ycbB	('ycbB')
649	cwlO	('cwlO')
650	lytH	('lytH')
651	ripA	('ripA')
652	ripB	('ripB')
653	hpxW	('hpxW')
654	E3.4.24.33	('E3.4.24.33')
655	pipA	('pipA')
656	tpdA	('tpdA')
657	prsW	('prsW')
658	patG	('patG')
659	sulfate<->APS	('sat')
660	APS<->sulfite_and	('aprA' & 'aprB')
661	APS<->sulfite_or	('aprA' | 'aprB')
662	dsrAB_and	('dsrA' & 'dsrB')
663	dsrAB_or	('dsrA' | 'dsrB')
664	dsrEFH_and	('dsrE' & 'dsrF' & 'dsrH')
665	dsrEFH_or	('dsrE' | 'dsrF' | 'dsrH')
666	asrABC_and	('asrA' & 'asrB' & 'asrC')
667	asrABC_or	('asrA' | 'asrB' | 'asrC')
668	sulfate->sulfite-reduction	('APS<->sulfite_and' & 'sulfate<->APS')	aprBA and sat are present
669	sulfite->sulfide-reduction	(('dsrAB_and' & 'dsrD' & !'dsrEFH_and') | ('asrABC_and') | ('mccA'))	DsrAB cluster with reductive DsrAB, dsrD gene is present, and dsrEFH are absent
670	sulfate->sulfide-reduction	('sulfate->sulfite-reduction' & 'sulfite->sulfide-reduction')	aprBA, sat are present, DsrAB cluster with reductive DsrAB, dsrD gene is present, and dsrEFH are absent
671	sreABC_and	('sreA' & 'sreB' & 'sreC')
672	sreABC_or	('sreA' | 'sreB' | 'sreC')
673	shyd_and	('hydG' & 'hydB_4')
674	shyd_or	('hydG' | 'hydB_4')
675	sulfur->sulfide-reduction	('sreABC_and' | 'shyd_and')
676	sorAB_and	('sorA' & 'sorB')
677	sorAB_or	('sorA' | 'sorB')
678	soeABC_and	('soeA' & 'soeB' & 'soeC')
679	soeABC_or	('soeA' | 'soeB' | 'soeC')
680	sulfite->sulfate-oxidation	(('APS<->sulfite_and' & 'sulfate<->APS') | ('sorAB_and') | ('soeABC_and'))
681	sulfide->sulfur-oxidation	(('fccA' & 'fccB') | 'sqr')
682	sulfur->sulfite-oxidation	('dsrAB_and' & 'dsrEFH_and' & !'dsrD')	DsrAB do not cluster with reductive DsrAB, dsrEFH are present, and dsrD is absent
683	sulfur->sulfate-oxidation	('dsrAB_and' & 'dsrEFH_and' & !'dsrD' & 'APS<->sulfite_and' & 'sulfate<->APS')	DsrAB do not cluster with reductive DsrAB, dsrEFH are present, and dsrD is absent, aprBA and sat are present
684	sulfur->sulfide+sulfite+thiosulfate-disproportionation	('sor')
685	phsABC_and	('phsA' & 'phsB' & 'phsC')
686	phsABC_or	('phsA' | 'phsB' | 'phsC')
	thiosulfate->sulfite+sulfide-disproportionation	('phsABC_and')
687	thiosulfate->sulfite+sulfide-disproportionation1	('phsABC_and' | 'sseA')
688	sox_and	('soxB' & 'soxC' & 'soxD')
689	sox_or	('soxB' | 'soxC' | 'soxD')
690	thiosulfate->sulfate	('sox_and')
691	doxAD_and	('doxA' & 'doxD')
692	thiosulfate->tetrathionate-oxidation	('doxAD_and' | 'tsdA')
693	ttrABC_and	('ttrA' & 'ttrB_dsrO' & 'ttrC')
694	ttrABC_or	('ttrA' | 'ttrB_dsrO' | 'ttrC')
695	tetrathionate->thiosulfate-reduction	('ttrABC_and')
696	DMSO->DMS_and	('dmsA' & 'dmsB' & 'dmsC')
697	DMSO->DMS_or	('dmsA' | 'dmsB' | 'dmsC')
698	DMSP->DMS	('dddL')
699	hdr1_and	('hdrA1' & 'hdrB1' & 'hdrC1')
700	hdr1_or	('hdrA1' | 'hdrB1' | 'hdrC1')
701	hdr2_and	('hdrA2' & 'hdrB2' & 'hdrC2')
702	hdr2_or	('hdrA2' | 'hdrB2' | 'hdrC2')
703	sulfate->sulfite-assimilatory	('sulfate->APS-assimilatory_and' & 'APS->sulfite' & 'sulfite->sulfide-assimilatory_and')
704	sulfite->sulfide-assimilatory_and	(('cysI' & 'cysJ') | 'sir')
705	sulfite->sulfide-assimilatory_or	('cysI' | 'cysJ' | 'sir')
706	APS->sulfite	('cysC' & 'cysH')
707	sulfate->APS-assimilatory_and	('cysNC' & 'cysN' & 'cysD')
708	sulfate->APS-assimilatory_or	('cysNC' | 'cysN' | 'cysD')
709	katE	('katE')
710	katG	('katG')
711	alginate biosynthesis/transport	('algK' | 'algE')
712	Psl polysaccharide biosynthesis/export	('pslA' | 'pslB' | 'pslD' | 'pslE' | 'pslF' | 'pslG' | 'pslH' | 'pslI' | 'pslJ' | 'pslK' | 'pslL')
713	Pel polysaccharide biosynthesis/export	('pelA' | 'pelB' | 'pelC' | 'pelD' | 'pelE' | 'pelF' | 'pelG')
714	Vi polysaccharide biosynthesis/export	('vexA' | 'vexB' | 'vexC' | 'vexD')
715	lipopolysaccharide assembly/export	('lptA' | 'lptB' | 'lptC' | 'lptD' | 'lptE' | 'lptF' | 'lptG')
716	colanic acid biosynthesis/exporter	('wzxC' | 'wcaB' | 'wcaC' | 'wcaD' | 'wcaE' | 'wcaF' | 'wcaI' | 'wcaJ' | 'wcaK' | 'wcaL' | 'wcaM')
717	exopolysaccharide production	('exoF' | 'exoY')
718	hsp10	('groES')
719	hsp24	('grpE')
720	hsp40	('dnaJ')
721	hsp60	('groEL' | 'cct')
722	hsp70	('dnaK')
723	hsp100_key	('hslU')
724	hsp100_or	('clpA' | 'clpB' | 'clpC' | 'clpE' | 'clpL' | 'clpX' | 'hslU')
725	hsp100_and	('clpA' & 'clpB' & 'clpC' & 'clpE' & 'clpL' & 'clpX' & 'hslU')
726	lon_or	(('lon') | ('lonB'))
727	heatinducibleTF	('hrcA')
728	TAsystemTypeII_generalstress	(('mazFE_and') | ('relEB_and'))
729	phoQP_and	('phoQ' & 'phoP')
730	mazFE_and	('mazF' & 'mazE')
731	relEB_and	('relE' & 'relB')
732	sodA	('sodA')
733	cspA	('cspA')
734	desA	('desA')
735	desKR	(('desK') | ('desR'))
736	deaD	('deaD')
737	rnr	('rnr')
738	pnp	('pnp')
739	ahpCF	(('ahpC_1' | 'ahpC_2' | 'ahpC_3') & ('ahpF'))
740	glutamate->glutamyl phosphate	('proB')
741	glutamyl phosphate->glutamic semialdehyde	('proA')
742	pyrroline5carboxylate->proline	('proC')
743	glutamate->glutamic semialdehyde	(('glutamate->glutamyl phosphate') & ('glutamyl phosphate->glutamic semialdehyde'))
744	glutamate->proline	(('glutamate->glutamic semialdehyde') & ('pyrroline5carboxylate->proline'))
745	ornithine->pyrroline5carboxylate	('rocD')
746	ornithine->proline	(('ocd') | (('rocD') & ('proC')))
747	proline_biosynthesis	(('glutamate->proline') | ('ornithine->proline'))
748	UDP-glucose+G6P->trehalose 6-phospate	('otsA')
749	trehalose 6-phospate->trehalose	(('otsB') | ('tps'))
750	trehalose_biosynthesis	(('UDP-glucose+G6P->trehalose 6-phospate') & ('trehalose 6-phospate->trehalose'))
751	choline->betaine aldehyde	('betA' | 'gbsB' | 'codA')
752	betaine aldehyde->betaine	('betB' | 'codA')
753	betaine_biosynthesis	(('choline->betaine aldehyde') & ('betaine aldehyde->betaine'))
754	glucosylglycerate_biosynthesis	(('ggs') | ('gpgP'))
755	mannosylglucosylglycerate_biosynthesis	(('mggA' & 'gpgP') | ('ggs' & 'mggS'))
756	mannosylglycerate_biosynthesis	(('mngA' & 'mngB') | ('mgs'))
757	proline transport	('proP')
758	glycine betaine/proline transport system	(('proV') | ('proW') | ('proX'))
759	glycine betaine transporter	('betL')
760	choline/glycine/proline betaine transport	('betT')
761	mechanosensitive channel	(('mscS') | ('mscL'))
762	TF_redox	(('oxyR') | ('soxR') | ('perR') | ('ohrR'))
763	urease	(('ureA') | ('ureB') | ('ureC') | ('ureAB'))
764	arginine antiporter	('adiC')
765	adiA	('adiA')
766	speA	('speA')
767	pdaD	('pdaD')
768	arginine decarboxylase	(('adiA') | ('speA') | ('pdaD'))
769	arginine amidinase	('rocF')
770	glutaminase	('glsA')
771	glutamate dependent acid tolerance	(('gadAB') | ('gadC'))
772	lysine decarboxylase	('cadA')
773	lysine antiporter	('cadB')
774	ornithine decarboxylase	('speF')
775	ornithine antiporter	('potE')
776	hdeAB	(('hdeA') | ('hdeB'))
777	cfa	('cfa')
778	nrsSR	(('nrsS') & ('nrsR'))
779	arcAB	(('arcA') & ('arcB'))
780	devSR	(('devS') & ('devR'))
781	regAB	(('regA') & ('regB'))
782	resED	(('resE') & ('resD'))
783	prrAB	(('prrA') & ('prrB'))
784	nreB	('nreB')
785	baeRS	(('baeR') & ('baeS'))
786	cpxAR	(('cpxA') & ('cpxR'))
787	cpxP	('cpxP')
788	phage shock protein	(('pspA') | ('pspB') | ('pspC') | ('pspD'))
789	aaeB	('aaeB')	0
790	aap_full	('aapJ' & 'aapQ' & 'aapM' & 'aapP')	1
791	aap_key	('aapJ')	1
792	abgT	('abgT')	1
793	acrD	('acrD')	0
794	acrF	('acrF')	0
795	actP	('actP')	1
796	ade_full	('adeB' & 'adeC')	0
797	ade_partial	('adeB' | 'adeC')	0
798	adiC	('adiC')	0
799	afu_full	('afuA' & 'afuB' & 'afuC')	1
800	afu_key	('afuA')	1
801	aga_full	('agaEIIA' & 'agaEIIB' & 'agaEIIC' & 'agaEIID')	1
802	aga_partial	('agaEIIA' | 'agaEIIB' | 'agaEIIC' | 'agaEIID')	1
803	agl_full	('aglE' & 'aglF' & 'aglG' & ('aglK' | 'msmX'))	1
804	agl_key	('aglE')	1
805	agu_full	('aguE' & 'aguF' & 'aguG')	1
806	agu_key	('aguE')	1
807	algE	('algE')	0
808	allP	('allP')	1
809	als_full	('alsA' & 'alsB' & 'alsC')	1
810	als_key	('alsB')	1
811	ameC	('ameC')	0
812	amiS	('amiS')	1
813	ampG	('ampG')	0
814	amsL	('amsL')	0
815	amt	('amt')	1
816	ansP	('ansP')	1
817	aot_full	('aotJ' & 'aotM' & 'aotQ' & 'aotP')	1
818	aot_key	('aotJ')	1
819	ara-1_full	('araN' & 'araP' & 'araQ' & 'msmX')	1
820	ara-1_key	('araN')	1
821	ara-2_full	('araF' & 'araG' & 'araH')	1
822	ara-2_key	('araF')	1
823	araE	('araE')	1
824	araJ	('araJ')	0
825	arcD	('arcD')	0
826	arg_full	('arg1' & 'arg2' & 'arg3' & 'arg4')	1
827	arg_key	('arg1')	1
828	argT	('argT')	1
829	arnE	('arnE')	0
830	arsB-1	('arsB1')	0
831	arsB-2	('arsB2')	0
832	art-1_full	('artJ' & 'artI' & 'artM' & 'artQ1' & 'artP1')	1
833	art-1_partial	('artJ' | 'artI')	1
834	art-2_full	('artQ2' & 'artP2' & 'artR')	1
835	art-2_key	('artP2')	1
836	asc_full	('ascEIIB' & 'ascEIIC')	1
837	asc_partial	('ascEIIB' | 'ascEIIC')	1
838	atoE_key	('atoE')	1
839	att_full	('attA1' & 'attB' & 'attC' & 'attA2')	1
840	att_key	('attC')	1
841	bce_full	('bceA' & 'bceB')	0
842	bce_key	('bceB')	0
843	bcr_full	('bcrA' & 'bcrB')	0
844	bcr_key	('bcrB')	0
845	benE	('benE')	1
846	betL	('betL')	1
847	betT	('betT')	1
848	bgl_full	('bglEIIA' & 'bglEIIB' & 'bglEIIC')	1
849	bgl_partial	('bglEIIA' | 'bglEIIB' | 'bglEIIC')	1
850	bglH	('bglH')	1
851	bgt_full	('bgtB' & 'bgtA')	1
852	bgt_key	('bgtB')	1
853	bica	('bica')	0
854	bio-1_full	('bioY' & 'bioN' & 'bioM')	1
855	bio-1_key	('bioY')	1
856	bio-2_full	('bioY' & 'ecfT' & ('ecfA1' | 'ecfA2'))	1
857	bio-2_key	('bioY')	1
858	blpA	('blpA')	0
859	bpeEF-oprC_full	('bpeE' & 'bpeF' & 'oprC')	0
860	bpeEF-oprC_partial	('bpeE' | 'bpeF' | 'oprC')	0
861	bra_full	('braD' & 'braE')	0
862	bra_partial	('braD' | 'braE')	0
863	btu_full	('btuC' & 'btuD' & 'btuF')	1
864	btu_key	('btuF')	1
865	btuB	('btuB')	1
866	bxl_full	('bxlE' & 'bxlF' & 'bxlG')	1
867	bxl_key	('bxlE')	1
868	cbi-1_full	('cbiM' & 'cbiN' & 'cbiO' & 'cbiQ')	1
869	cbi-1_partial	('cbiM' | 'cbiN' | 'cbiQ')	1
870	cbi-2_full	('cbiK' & ('cbiN' | 'cbiL') & 'cbiM' & 'cbiQ' & 'cbiO')	1
871	cbi-2_key	('cbiK')	1
872	ccm-1_full	('ccmD' & 'ccmB' & 'ccmC' & 'ccmA')	0
873	ccm-1_partial	('ccmD' | 'ccmB' | 'ccmC' | 'ccmA')	0
874	ceb_full	('cebE' & 'cebF' & 'cebG' & 'msmX')	1
875	ceb_key	('cebE')	1
876	cel_full	('celEIIA' & 'celEIIB' & 'celEIIC')	1
877	cel_partial	('celEIIA' | 'celEIIB' | 'celEIIC')	1
878	cfrA	('cfrA')	1
879	chaA	('chaA')	1
880	chi_full	('chiE' & 'chiF' & 'chiG')	1
881	chi_key	('chiE')	1
882	chrA	('chrA')	0
883	citA	('citA')	1
884	citT	('citT')	1
885	cmlA	('cmlA')	0
886	cmp_full	('cmpB' & 'cmpA' & 'cmpC' & 'cmpD')	1
887	cmp_key	('cmpA')	1
888	codB	('codB')	1
889	corA	('corA')	1
890	cusA	('cusA')	0
891	cusC	('cusC')	0
892	cycA	('cycA')	1
893	cyd_full	('cydC' & 'cydD' & 'cydCD')	0
894	cyd_partial	('cydC' | 'cydD' | 'cydCD')	0
895	cys_full	('sbp' & 'cysU' & 'cysA' & 'cysW' & 'cysP')	1
896	cys_partial	('sbp' | 'cysP')	1
897	czcA	('czcA')	0
898	czcC	('czcC')	0
899	czcD	('czcD')	0
900	das_full	('dasC' & 'dasB' & 'dasA')	1
901	das_key	('dasA')	1
902	dct_full	('dctQ' & 'dctP' & 'dctM')	1
903	dct_key	('dctP')	1
904	dctA	('dctA')	1
905	dcuA	('dcuA')	1
906	dcuB	('dcuB')	1
907	dcuC	('dcuC')	1
908	dev_full	('devC' & 'devA' & 'devB' & 'hgdD')	0
909	dev_partial	('devC' | 'devA' | 'devB' | 'hgdD')	0
910	dga_full	('dgaEIIA' & 'dgaEIIB' & 'dgaEIIC' & 'dgaEIID')	1
911	dga_partial	('dgaEIIA' | 'dgaEIIB' | 'dgaEIIC' & 'dgaEIID')	1
912	dgl_full	('dglEIIA' & 'dglEIIB' & 'dglEIIC')	1
913	dgl_partial	('dglEIIA' | 'dglEIIB' | 'dglEIIC')	1
914	dltB	('dltB')	1
915	dpp-1_full	('dppA1' & 'dppB1' & 'dppC1' & 'dppD1' & 'dppF1')	1
916	dpp-1_key	('dppA1')	1
917	dpp-2_full	('dppB2' & 'dppC2' & 'dppD2' & 'dppE')	1
918	dpp-2_key	('dppE')	1
919	dsdX	('dsdX')	1
920	eamA	('eamA')	0
921	eamB	('eamB')	0
922	ebr-1_full	('ebrA' & 'ebrB')	0
923	ebr-1_partial	('ebrA' | 'ebrB')	0
924	ebr-2	('ebr')	0
925	ecfA1	('ecfA1')	1
926	eexD_key	('eexD')	0
927	efeB	('efeB')	1
928	efeO	('efeO')	1
929	emrK	('emrK')	0
930	emrY	('emrY')	0
931	entS	('entS')	0
932	eps_full	('epsE' & 'epsF')	0
933	eps_partial	('epsE' | 'epsF')	0
934	ery_full	('eryG' & 'eryF' & 'eryE')	1
935	ery_key	('eryG')	1
936	exb_full	('exbB' & 'exbD')	1
937	exb_key	('exbB' | 'exbD')	1
938	exbD_full	('exbB' | 'exbD')	1
939	exbD_key	('exbB' | 'exbD')	1
940	exoF	('exoF')	0
941	exoT	('exoT')	0
942	fadL	('fadL')	1
943	fdhC	('fdhC')	1
944	fec_full	('fecE' & 'fecB' & 'fecD' & 'fecC')	1
945	fec_key	('fecB')	1
946	fecA	('fecA')	1
947	fep_full	('fepC' & 'fepG' & 'fepD' & 'fepB')	1
948	fep_key	('fepB')	1
949	fepA	('fepA')	1
950	fev_full	('fevA' & 'fevP' & 'fevS')	1
951	fev_key	('fevS')	1
952	fhu_full	('fhuC' & 'fhuB' & 'fhuD')	1
953	fhu_key	('fhuD')	1
954	fieF	('fieF')	0
955	fiu	('fiu')	1
956	flq_full	('flqA' & 'flqB' & 'flqC')	0
957	flq_partial	('flqA' | 'flqB' | 'flqC')	0
958	focA	('focA')	1
959	focB	('focB')	1
960	fpvA	('fpvA')	1
961	frc_full	('frcA' & 'frcB' & 'frcC')	1
962	frc_key	('frcB')	1
963	fru1_full	('fru1EIIA' & 'fru1EIIB' & 'fru1EIIC' & 'levG')	1
964	fru1_partial	('fru1EIIA' | 'fru1EIIB' | 'fru1EIIC' & 'levG')	1
965	fru2_full	('fru2EIIA' & 'fru2EIIB' & 'fru2EIIC')	1
966	fru2_partial	('fru2EIIA' | 'fru2EIIB' | 'fru2EIIC')	1
967	ftrA	('ftrA')	1
968	gadC	('gadC')	0
969	gal_full	('galEIIA' & 'galEIIB' & 'galEIIC')	1
970	gal_partial	('galEIIA' | 'galEIIB' | 'galEIIC')	1
971	galP	('galP')	1
972	gam_full	('gamEIIB' & 'gamEIIC' & 'gamEIID')	1
973	gam_partial	('gamEIIB' | 'gamEIIC' | 'gamEIID')	1
974	gan_full	('ganO' & 'ganP' & 'ganQ' & ('malK' | 'msmX'))	1
975	gan_key	('ganO')	1
976	gat_full	('gatEIIA' & 'gatEIIB' & 'gatEIIC')	1
977	gat_partial	('gatEIIA' | 'gatEIIB' | 'gatEIIC')	1
978	gesB	('gesB')	0
979	gfr_full	('gfrEIIA' & 'gfrEIIB' & 'gfrEIIC' & 'gfrEIID')	1
980	gfr_partial	('gfrEIIA' | 'gfrEIIB' | 'gfrEIIC' & 'gfrEIID')	1
981	ggu_full	('gguA' & 'gguP' & 'gguS')	1
982	ggu_key	('gguS')	1
983	glc_full	('glcP' & 'glcP1' & 'glcS' & 'glcA')	1
984	glc_key	('glcS')	1
985	glc-1_full	('glc1EIIA' & 'glc1EIIB' & 'glc1EIIC')	1
986	glc-1_partial	('glc1EIIA' | 'glc1EIIB' | 'glc1EIIC')	1
987	glc-2_full	('glc2EIIA' & 'glc2EIIB' & 'glc2EIIC')	1
988	glc-2_partial	('glc2EIIA' | 'glc2EIIB' | 'glc2EIIC')	1
989	glcT1	('glcT1')	1
990	glcU	('glcU')	1
991	glf	('glf')	1
992	gln_full	('glnH' & 'glnP' & 'glnQ')	1
993	gln_key	('glnH')	1
994	glp_full	('glpP' & 'glpQ' & 'glpV' & 'glpS' & 'glpT')	1
995	glp_key	('glpV')	1
996	glpF	('glpF')	1
997	glt_full	('gltI' & 'gltK' & 'gltJ' & 'gltL')	1
998	glt_key	('gltI')	1
999	gltP	('gltP')	1
1000	glu_full	('gluB' & 'gluC' & 'gluD' & 'gluA')	1
1001	glu_key	('gluB')	1
1002	glucP	('glucP')	1
1003	glv_full	('glvEIIB' & 'glvEIIC')	1
1004	glv_partial	('glvEIIB' | 'glvEIIC')	1
1005	glycA	('glcA')	1
1006	gntP	('gntP')	1
1007	gntT	('gntT')	1
1008	gntU	('gntU')	1
1009	gsi_full	('gsiC' & 'gsiD' & 'gsiB' & 'gsiA')	1
1010	gsi_key	('gsiB')	1
1011	gts_full	('gtsA' & 'gtsB' & 'gtsC' & 'msmX')	1
1012	gts_key	('gtsA')	1
1013	gut_full	('gutEIIA' & 'gutEIIB' & 'gutEIIC')	1
1014	gut_partial	('gutEIIA' | 'gutEIIB' | 'gutEIIC')	1
1015	gutA	('gutA')	1
1016	hasA	('hasA')	1
1017	hasR	('hasR')	1
1018	hcaT	('hcaT')	1
1019	his_full	('hisJ' & 'hisP' & 'hisQ' & 'hisM')	1
1020	his_key	('hisJ')	1
1021	hpt	('hpt')	1
1022	hrt_full	('hrtA' & 'hrtB')	1
1023	hrt_key	('hrtB')	1
1024	hutM	('hutM')	1
1025	hutT	('hutT')	1
1026	hxt	('hxt')	1
1027	idnT	('idnT')	1
1028	ino_full	('inoF' & 'inoG' & 'inoE' & 'inoK')	1
1029	ino_key	('inoE')	1
1030	iolF	('iolF')	1
1031	itsp-1_full	('ibpA1' & 'iatP1' & 'iatA1')	1
1032	itsp-1_key	('ibpA1')	1
1033	itsp-2_full	('iatP2' & 'iatA2' & 'ibpA2')	1
1034	itsp-2_key	('ibpA2')	1
1035	kdgM	('kdgM')	1
1036	kdgT	('kdgT')	1
1037	kgtP	('kgtP')	1
1038	kps_full	('kpsM' & 'kpsE' & 'kpsT')	0
1039	kps_key	('kpsE' | 'kpsT')	0
1040	kup	('kup')	1
1041	lac-1_full	('lacEIIA' & 'lacEIIB' & 'lacEIIC')	0
1042	lac-1_partial	('lacEIIA' | 'lacEIIB' | 'lacEIIC')	0
1043	lac-2_full	('lacE' & 'lacF' & 'lacG' & 'lacK')	1
1044	lac-2_key	('lacE')	1
1045	lacS	('lacS')	1
1046	lacY	('lacY')	1
1047	lamB	('lamB')	1
1048	lctB	('lctB')	1
1049	lctP-1	('lctP1')	1
1050	lctP-2	('lctP2')	1
1051	leuE	('leuE')	0
1052	lhp_full	('lhpM' & 'lhpN' & 'lhpO' & 'lhpP')	1
1053	lhp_key	('lhpP')	1
1054	liv_full	('livG' & 'livF' & 'livH' & 'livM' & 'livK')	1
1055	liv_key	('livK')	1
1056	lol_and	('lolD' & 'lolC_E')	0
1057	lol_or	('lolD' | 'lolC_E')	0
1058	lpiT	('lplT')	1
1059	lpl_full	('lplC' & 'lplB' & 'lplA')	1
1060	lpl_key	('lplA')	1
1061	lpse_full	('lpseA' & 'lpseP')	0
1062	lpse_key	('lpseP')	0
1063	lpt_and	('lptB' & 'lptF' & 'lptG')	0
1064	lpt_or	('lptB' | 'lptF' | 'lptG')	0
1065	lptA	('lptA')	0
1066	lptC_and	('lptC' & 'lptD' & 'lptG')	0
1067	lptC_or	('lptC' | 'lptD' | 'lptG')	0
1068	lptD_and	('lptC' & 'lptD' & 'lptG')	0
1069	lptD_or	('lptC' | 'lptD' | 'lptG')	0
1070	lptE	('lptE')	0
1071	lys_full	('lysX1' & 'lysX2' & 'lysY')	1
1072	lys_key	('lysX1')	1
1073	lysE	('lysE')	0
1074	lysP	('lysP')	1
1075	macA_full	('macA' & 'macB')	0
1076	macA_partial	('macA' | 'macB')	0
1077	macB_full	('macA' & 'macB')	0
1078	macB_partial	('macA' | 'macB')	0
1079	maeN	('maeN')	1
1080	mal-1_full	('malEIIB' & 'malEIIC')	0
1081	mal-1_partial	('malEIIB' | 'malEIIC')	0
1082	mal-2_full	('malE' & 'malF' & 'malG' & ('malK' | 'msmX'))	1
1083	mal-2_key	('malE')	1
1084	malglc_full	('malglcEIIB' & 'malglcEIIC')	1
1085	malglc_partial	('malglcEIIB' | 'malglcEIIC')	1
1086	malY	('malY')	1
1087	man_full	('manEIIA' & 'manEIIB' & 'manEIIC' & 'manEIID')	1
1088	man_partial	('manEIIA' | 'manEIIB' | 'manEIIC' & 'manEIID')	1
1089	marC	('marC')	1
1090	mdcF	('mdcF')	1
1091	mdt_full	('mdtB' & 'mdtC')	0
1092	mdt_partial	('mdtB' | 'mdtC')	0
1093	mdtD	('mdtD')	0
1094	mdtF	('mdtF')	0
1095	mdtO	('mdtO')	0
1096	mdtP	('mdtP')	0
1097	melB	('melB')	1
1098	mer_full	('merP' & 'merT')	1
1099	mer_partial	('merP' | 'merT')	1
1100	merC	('merC')	1
1101	merE	('merE')	1
1102	met_full	('metN' & 'metI' & 'metQ')	1
1103	met_key	('metQ')	1
1104	mfs.cp	('mfs.cp')	1
1105	mfs.set	('mfs.set')	0
1106	mgl_full	('mglA' & 'mglB' & 'mglC')	1
1107	mgl_key	('mglB')	1
1108	mgtE	('mgtE')	1
1109	mhpT	('mhpT')	0
1110	mla-1_full	('mlaB' & 'mlaC' & 'mlaF' & 'mlaE' & 'mlaD')	1
1111	mla-1_partial	('mlaB' | 'mlaC' | 'mlaF' | 'mlaE' | 'mlaD')	1
1112	mla-2	('mlaA')	1
1113	mleP	('mleP')	1
1114	mmpL10	('mmpL10')	0
1115	mmpL11	('mmpL11')	1
1116	mmr	('mmr')	0
1117	mmuP	('mmuP')	1
1118	mn_full	('mnA' & 'mnP' & 'mnS')	1
1119	mn_key	('mnS')	1
1120	mng_full	('mngEIIA' & 'mngEIIB' & 'mngEIIC')	1
1121	mng_partial	('mngEIIA' | 'mngEIIB' | 'mngEIIC')	1
1122	mnh_full	('mnhB' & 'mnhC' & 'mnhE' & 'mnhA' & 'mnhF' & 'mnhG' & 'mnhD')	1
1123	mnh_partial	('mnhB' | 'mnhC' | 'mnhE' | 'mnhA' | 'mnhF' | 'mnhG' | 'mnhD')	1
1124	mnt-1_full	('mntA1' & 'mntB1' & 'mntC1')	1
1125	mnt-1_key	('mntC1')	1
1126	mnt-2_full	('mntA2' & 'mntB2' & 'mntC2')	1
1127	mnt-2_key	('mntC2')	1
1128	mntH	('mntH')	1
1129	mntP_key	('mntP')	0
1130	mod_full	('modF' & 'modC' & 'modB' & 'modA')	1
1131	mod_key	('modA')	1
1132	motA	('motA')	0
1133	motB	('motB')	0
1134	msbA	('msbA')	0
1135	mscL	('mscL')	0
1136	msm-1_full	('msmE1' & 'msmF1' & 'msmG1' & 'msmX')	1
1137	msm-1_key	('msmE1')	1
1138	msm-2_full	('msmE2' & 'msmF2' & 'msmG2' & 'msmX')	1
1139	msm-2_key	('msmE2')	1
1140	mthK	('mthK')	1
1141	mtl-1_full	('mtlEIIA' & 'mtlEIIB' & 'mtlEIIC')	0
1142	mtl-1_partial	('mtlEIIA' | 'mtlEIIB' | 'mtlEIIC')	0
1143	mtl-2_full	('mtlE' & 'mtlF' & 'mtlG' & ('malK' | 'msmX'))	1
1144	mtl-2_partial	('mtlE')	1
1145	mtr-2	('mtr')	1
1146	mtrD	('mtrD')	0
1147	mts_full	('mtsA' & 'mtsB' & 'mtsC')	1
1148	mts_key	('mtsA')	1
1149	mur_full	('murEIIB' & 'murEIIC')	1
1150	mur_partial	('murEIIB' | 'murEIIC')	1
1151	nag_full	('nagEIIA' & 'nagEIIB' & 'nagEIIC')	1
1152	nag_partial	('nagEIIA' | 'nagEIIB' | 'nagEIIC')	1
1153	nat-1_full	('natA' & 'natB')	1
1154	nat-1_key	('natB')	1
1155	nat-2_full	('natB1' & 'natC' & 'natD1' & 'natA1' & 'natE')	1
1156	nat-2_key	('natB1')	1
1157	nepI	('nepI')	0
1158	ngc_full	('ngcE' & 'ngcF' & 'ngcG')	1
1159	ngc_key	('ngcE')	1
1160	nhaA	('nhaA')	1
1161	nhaB	('nhaB')	1
1162	nhaC	('nhaC')	1
1163	niaX	('niaX')	1
1164	nik_full	('nikA' & 'nikB' & 'nikC' & 'nikD' & 'nikE')	1
1165	nik_key	('nikA')	1
1166	nirC	('nirC')	1
1167	nis_full	('nisG' & 'nisE' & 'nisF')	0
1168	nis_partial	('nisG' | 'nisE' | 'nisF')	0
1169	nisA	('nisA')	1
1170	nitregulatory_full	('ptsP' & 'ptsO' & 'ntrEIIA')	1
1171	nitregulatory_partial	('ptsP' & 'ptsO' | 'ntrEIIA')	1
1172	nixA	('nixA')	1
1173	nod_full	('nodI' & 'nodJ')	0
1174	nod_partial	('nodI' | 'nodJ')	0
1175	nos_full	('nosF' & 'nosY')	1
1176	nos_key	('nosY')	1
1177	nrsA	('nrsA')	0
1178	nrt_full	('nrtD' & 'nrtC' & 'nrtB' & 'nrtA')	1
1179	nrt_key	('nrtA')	1
1180	nuk_full	('nukE' & 'nukF' & 'nukG')	0
1181	nuk_partial	('nukE' | 'nukF' | 'nukG')	0
1182	nupC	('nupC')	1
1183	nupG	('nupG')	1
1184	nupX	('nupX')	1
1185	occ_full	('occP' & 'occQ' & 'occM' & 'occT')	1
1186	occ_key	('occT')	1
1187	oleC_full	('oleC4' & 'oleC5')	0
1188	oleC_key	('oleC5')	0
1189	ompA	('ompA')	1
1190	opmD_key	('opmD')	0
1191	opmE	('opmE')	0
1192	opp-1_full	('oppA1' & 'oppB1' & 'oppC1' & 'oppD1' & 'oppF1')	1
1193	opp-1_key	('oppA1')	1
1194	oprB	('oprB')	1
1195	oprD	('oprD')	1
1196	oprN	('oprN')	0
1197	oprO_P	('oprO_P')	1
1198	opu_and	('opuBD' & 'opuA' & 'opuC')	0
1199	opu_key	('opuC')	0
1200	oqxB	('oqxB')	0
1201	oxlT	('oxlT')	1
1202	pa_full	('pap' & 'pas')	1
1203	pa_partial	('pap' | 'pas')	1
1204	paa	('paa')	1
1205	panF	('panF')	1
1206	pbuE	('pbuE')	0
1207	pbuG	('pbuG')	1
1208	peb_full	('peb1A' & 'peb1B' & 'peb1C')	1
1209	peb_key	('peb1A')	1
1210	pha_full	('phaC' & 'phaF' & 'phaG' & 'phaE' & 'phaD' & 'phaA')	1
1211	pha_partial	('phaC' | 'phaF' | 'phaG' | 'phaE' | 'phaD' | 'phaA')	1
1212	pheP	('pheP')	1
1213	phn-1_full	('phnS' & 'phnV' & 'phnU' & 'phnT')	1
1214	phn-1_partial	('phnS' | 'phnV' | 'phnU' | 'phnT')	1
1215	phn-2_full	('phnC' & 'phnE' & 'phnD')	1
1216	phn-2_partial	('phnC' | 'phnE' | 'phnD')	1
1217	pho84	('PHO84')	1
1218	phoE	('phoE')	1
1219	pit	('pit')	1
1220	pro_and	('proW' & 'proV' & 'proX')	0
1221	pro_key	('proX')	0
1222	proP	('proP')	1
1223	proY	('proY')	1
1224	pslD	('pslD')	0
1225	pst_full	('pstC' & 'pstA' & 'pstB' & 'pstS')	1
1226	pst_partial	('pstC' | 'pstA' | 'pstB' | 'pstS')	1
1227	psuT	('psuT')	1
1228	ptsIfruB_full	('ptsI' & 'fruB')	0
1229	ptsIfruB_partial	('ptsI' | 'fruB')	0
1230	ptsIhpr_full	('ptsI' & 'hpr')	0
1231	ptsIhpr_partial	('ptsI' | 'hpr')	0
1232	ptsIptsH_full	('ptsI' & 'ptsH')	0
1233	ptsIptsH_partial	('ptsI' | 'ptsH')	0
1234	ptsPptsO_full	('ptsP' & 'ptsO')	0
1235	ptsPptsO_partial	('ptsP' | 'ptsO')	0
1236	pucJ	('pucJ')	1
1237	putP	('putP')	1
1238	puuP	('puuP')	1
1239	pvdE	('pvdE')	0
1240	rbs_full	('rbsA' & 'rbsB' & 'rbsC')	1
1241	rbs_key	('rbsB')	1
1242	rbsU	('rbsU')	1
1243	rcnA	('rcnA')	1
1244	rha-1_full	('rhaP' & 'rhaQ' & 'rhaS' & 'rhaT1')	1
1245	rha-1_key	('rhaS')	1
1246	rha-2	('rhaT2')	1
1247	rhtA	('rhtA')	0
1248	rhtB	('rhtB')	0
1249	rhtC	('rhtC')	0
1250	rib_full	('ribS' & 'ribP')	1
1251	rib_partial	('ribS' | 'ribP')	1
1252	rocE	('rocE')	1
1253	rutG	('rutG')	1
1254	sam	('sam')	1
1255	sap_full	('sapA' & 'sapB' & 'sapC' & 'sapD' & 'sapF')	1
1256	sap_key	('sapA')	1
1257	satP	('satP')	1
1258	scr_full	('scrEIIA' & 'scrEIIB' & 'scrEIIC')	1
1259	scr_partial	('scrEIIA' | 'scrEIIB' | 'scrEIIC')	1
1260	scrY	('scrY')	1
1261	sdaC	('sdaC')	1
1262	sit_full	('sitA' & 'sitB' & 'sitC' & 'sitD')	1
1263	sit_key	('sitA')	1
1264	sme_full	('smeB' & 'smeC')	0
1265	sme_partial	('smeB' | 'smeC')	0
1266	sor_full	('sorEIIA' & 'sorEIIB' & 'sorEIIC' & 'sorEIID')	1
1267	sor_partial	('sorEIIA' | 'sorEIIB' | 'sorEIIC' & 'sorEIID')	1
1268	sotB	('sotB')	0
1269	sstT	('sstT')	1
1270	ssu_full	('ssuB' & 'ssuC' & 'ssuA')	1
1271	ssu_key	('ssuA')	1
1272	ste_full	('steA' & 'steB')	0
1273	ste_partial	('steA' | 'steB')	0
1274	sug-1_full	('sugP' & 'sugP1' & 'sugS1')	1
1275	sug-1_partial	('sugP' | 'sugP1' | 'sugS1')	1
1276	sug-2_full	('sugA' & 'sugP2' & 'sugS2')	1
1277	sug-2_partial	('sugA' | 'sugP2' | 'sugS2')	1
1278	syrD	('syrD')	0
1279	tag_full	('tagH' & 'tagG')	1
1280	tag_key	('tagG')	1
1281	tau_full	('tauB' & 'tauC' & 'tauA')	1
1282	tau_key	('tauA')	1
1283	tc_2.A.76.1.6	('tc_2.A.76.1.6')	0
1284	tc.aat	('tc.aat')	1
1285	tc.agcs	('tc.agcs')	1
1286	tc.apa	('tc.apa')	1
1287	tc.bat2	('tc.bat2')	0
1288	tc.citmhs	('tc.citmhs')	1
1289	tc.cnt	('tc.cnt')	1
1290	tc.dass	('tc.dass')	1
1291	tc.dme	('TC.DME')	0
1292	tc.fev	('tc.fev')	1
1293	tc.gntp	('TC.GNTP')	1
1294	tc.gph	('tc.gph')	1
1295	tc.hae1	('TC.HAE1')	0
1296	tc.livcs	('tc.livcs')	1
1297	tc.ncs1	('tc.ncs1')	1
1298	tc.ncs2	('tc.ncs2')	1
1299	tc.nss	('tc.nss')	1
1300	tc.pot	('tc.pot')	1
1301	tc.sss	('tc.sss')	1
1302	tc.sulp	('tc.sulp')	1
1303	tc2.A.86.1.7	('tc2.A.86.1.7')	1
1304	tct_full	('tctB' & 'tctC' & 'tctA')	1
1305	tct_partial	('tctB' | 'tctC' | 'tctA')	1
1306	tcy-1_full	('tcyA' & 'tcyB' & 'tcyC')	1
1307	tcy-1_key	('tcyA')	1
1308	tcy-2_full	('tcyJ' & 'tcyK' & 'tcyL' & 'tcyM' & 'tcyN')	1
1309	tcy-2_partial	('tcyJ' | 'tcyK')	1
1310	tdcC	('tdcC')	1
1311	tehA	('tehA')	0
1312	tet35	('tet35')	0
1313	thi_full	('thiQ' & 'thiP' & 'thiB')	1
1314	thi_key	('thiB')	1
1315	thiT	('thiT')	1
1316	thu_full	('thuE' & 'thuF' & 'thuG' & 'malK')	1
1317	thu_key	('thuE')	1
1318	tnaB	('tnaB')	1
1319	tog_full	('togA' & 'togM' & 'togN' & 'togB')	1
1320	tog_key	('togB')	1
1321	togT	('togT')	1
1322	tol_full	('tolQ' & 'tolR')	1
1323	tol_partial	('tolQ' | 'tolR')	1
1324	treE_full	('treEIIA' & 'treEIIB' & 'treEIIC')	1
1325	treE_partial	('treEIIA' | 'treEIIB' | 'treEIIC')	1
1326	triC	('triC')	0
1327	trkA	('trkA')	1
1328	trkH	('trkH')	1
1329	tro_full	('troA' & 'troB' & 'troC' & 'troD')	1
1330	tro_key	('troA')	1
1331	trp_full	('trpA' & 'trpP' & 'trpS')	1
1332	trp_key	('trpS')	1
1333	tsx	('tsx')	1
1334	ttdT	('ttdT')	1
1335	tuaB	('tuaB')	0
1336	tup_full	('tupA' & 'tupB' & 'tupC')	1
1337	tup_key	('tupA')	1
1338	tutB	('tutB')	1
1339	tyrP	('tyrP')	1
1340	ugp_and	('ugpC' & 'ugpE' & 'ugpA' & 'ugpB')	0
1341	ugp_key	('ugpB')	0
1342	uhpC	('uhpC')	1
1343	uid-1	('uidC')	1
1344	uid-2	('uidB')	1
1345	ula_full	('ulaEIIA' & 'ulaEIIB' & 'ulaEIIC')	1
1346	ula_partial	('ulaEIIA' | 'ulaEIIB' | 'ulaEIIC')	1
1347	uraA	('uraA')	1
1348	urt_full	('urtB' & 'urtD' & 'urtE' & 'urtA' & 'urtC')	1
1349	urt_key	('urtA')	1
1350	utp	('utp')	1
1351	vb1x_and	('vb1xA' & 'vb1xS' & 'vb1xP')	0
1352	vb1x_key	('vb1xS')	0
1353	vex_full	('vexB' & 'vexD' & 'vexC')	0
1354	vex_key	('vexB' | 'vexD')	0
1355	vexA	('vexA')	0
1356	vexF	('vexF')	0
1357	vpsM	('vpsM')	0
1358	vpsN	('vpsN')	0
1359	wtp_full	('wtpA' & 'wtpB' & 'wtpC')	1
1360	wtp_key	('wtpA')	1
1361	wza	('wza')	0
1362	wzxC	('wzxC')	0
1363	xanP	('xanP')	1
1364	xanQ	('xanQ')	1
1365	xapB	('xapB')	1
1366	xlt_full	('xltA' & 'xltB' & 'xltC')	1
1367	xlt_key	('xltC')	1
1368	xyl_full	('xylF' & 'xylG' & 'xylH')	1
1369	xyl_key	('xylF')	1
1370	xylE	('xylE')	1
1371	yad_full	('yadH' & 'yadG')	0
1372	yad_partial	('yadH' | 'yadG')	0
1373	yahN	('yahN')	0
1374	ydjE	('ydjE')	1
1375	yia_full	('yiaN' & 'yiaM' & 'yiaO')	1
1376	yia_partial	('yiaN' | 'yiaM' | 'yiaO')	1
1377	yjbB	('yjbB')	1
1378	yjeH	('yjeH')	0
1379	ykk_full	('ykkC' & 'ykkD')	0
1380	ykk_partial	('ykkC' | 'ykkD')	0
1381	ylnA	('ylnA')	1
1382	ynfM	('ynfM')	0
1383	yojI	('yojI')	0
1384	yqgE	('yqgE')	1
1385	yrbG	('yrbG')	1
1386	ytr_full	('ytrB' & 'ytrE' & 'ytrF' & 'ytrC_D')	1
1387	ytr_partial	('ytrB' | 'ytrE' | 'ytrF' | 'ytrC_D')	1
1388	yuiF	('yuiF')	1
1389	yxjA	('yxjA')	1
1390	yyd_full	('yydI' & 'yydJ')	0
1391	yyd_partial	('yydI' | 'yydJ')	0
1392	zipB	('zipB')	1
1393	zm_full	('zmA' & 'zmP' & 'zmS')	1
1394	zm_key	('zmS')	1
1395	zntB	('zntB')	1
1396	znu_full	('znuA' & 'znuB' & 'znuC')	1
1397	znu_key	('znuA')	1
1398	pyruvate->SCFAs	(('pyruvate->butanoate') | ('propionate fermentation_succinatepathway') | ('pyruvate->acetate'))
1399	pyruvate->lactate and ethanol	(('pyruvate->lactate') & ('acetaldehyde->ethanol'))
1400	pyruvate->alcohols	(('pyruvate->ethanol') | ('pyruvate->butyleneglycol') | ('acetone->isopropanol') | ('pyruvate->butanol'))
1401	acetyl-CoA->acetate	(('acetyl-CoA->acetyl-P') & ('acetyl-P<->acetate'))
1402	nuo_and	('nuoA' & 'nuoB' & 'nuoC' & 'nuoD' & 'nuoE' & 'nuoF' & 'nuoG' & 'nuoH' & 'nuoI' & 'nuoJ' & 'nuoK' & 'nuoL' & 'nuoM' & 'nuoN')
1403	nuo_or	('nuoA' | 'nuoB' | 'nuoBCD' | 'nuoC' | 'nuoCD' | 'nuoD' | 'nuoE' | 'nuoF' | 'nuoG' | 'nuoH' | 'nuoI' | 'nuoJ' | 'nuoK' | 'nuoL' | 'nuoLM' | 'nuoM' | 'nuoN')
1404	ETC_complexI	('nuo_and')
1405	ETC_complexII	('succinate->fumarate_key')
1406	cytochromecreductase_or	('qcrA' | 'fbcH' | 'petB_2' | 'petB_1' | 'qcrB')
1407	ETC_complexIII	('cytochromecreductase_or')
1408	cytochromeoubiquinol_and	('cyoA' & 'cyoB' & 'cyoC')
1409	cytochromec_and	('coxA' & 'coxB' & 'coxC')
1410	cytochromeaa3600menaquinol_and	('qoxA' & 'qoxB' & 'qoxC')
1411	cytochromeccbb3oxidase_and	('ccoN' & 'ccoO' & 'ccoP')
1412	ETC_complexIV	(('cytochromeoubiquinol_and') | ('cytochromec_and') | ('cytochromeaa3600menaquinol_and' | 'cytochromeccbb3oxidase_and'))
1413	cytochromebd_and	('cydA' & 'cydB')
1414	ATPaseFtype_and	('atpA' & 'atpB' & 'atpC' & 'atpD' & 'atpE' & 'atpF' & 'atpG' & 'atpH')
1415	ATPaseVAtype_and	('atpvaA' & 'atpvaB' & 'atpvaC' & 'atpvaD' & 'atpvaE' & 'atpvaF' & 'atpvaGH')
1416	ndh_and	('ndhA' & 'ndhB' & 'ndhC' & 'ndhD' & 'ndhE' & 'ndhF' & 'ndhG' & 'ndhH' & 'ndhI' & 'ndhJ' & 'ndhK' & 'ndhL' & 'ndhM' & 'ndhN')
1417	ndh_or	('ndhA' | 'ndhB' | 'ndhC' | 'ndhD' | 'ndhE' | 'ndhF' | 'ndhG' | 'ndhH' | 'ndhI' | 'ndhJ' | 'ndhK' | 'ndhL' | 'ndhM' | 'ndhN')
1418	hox_and	('hoxE' & 'hoxF_1' & 'hoxU_1')
1419	hox_or	('hoxE' | 'hoxF_1' | 'hoxU_1')
1420	qmo_and	('qmoA' & 'qmoB' & 'qmoC')
1421	qmo_or	('qmoA' | 'qmoB' | 'qmoC')
1422	fpo_and	('fpoA' & 'fpoB' & 'fpoC' & 'fpoD' & 'fpoF' & 'fpoH' & 'fpoI' & 'fpoJ' & 'fpoK' & 'fpoL' & 'fpoM' & 'fpoN' & 'fpoO')
1423	fpo_or	('fpoA' | 'fpoB' | 'fpoC' | 'fpoD' | 'fpoF' | 'fpoH' | 'fpoI' | 'fpoJ' & 'fpoK' | 'fpoL' | 'fpoM' | 'fpoN' | 'fpoO')
1424	ech_and	('echA' & 'echB' & 'echC' & 'echD' & 'echE' & 'echF')
1425	ech_or	('echA' | 'echB' | 'echC' | 'echD' | 'echE' | 'echF')
1426	vht_and	('vhtA' & 'vhtC' & 'vhtG')
1427	vht_or	('vhtA' | 'vhtC' | 'vhtG')
1428	nqr_and	('nqrA' & 'nqrB' & 'nqrC' & 'nqrD' & 'nqrE' & 'nqrF')
1429	nqr_or	('nqrA' | 'nqrB' | 'nqrC' | 'nqrD' | 'nqrE' | 'nqrF')
1430	hyd_and	('hydA_1' & 'hydD' & 'hydG' & 'hydB_1')
1431	hyd_or	('hydA_1' | 'hydD' | 'hydG' | 'hydB_1')
1432	rnf_and	('rnfA' & 'rnfB' & 'rnfC' & 'rnfD' & 'rnfE' & 'rnfG')
1433	rnf_or	('rnfA' | 'rnfB' | 'rnfC' | 'rnfD' | 'rnfE' | 'rnfG')
1434	bacteriochlorophyll g synthesis	('bchX' | 'bchY' | 'bchZ')

## Sheet: ST5.microtrait_rule-to-traits
excel-sheetorder	microtrait_rule-name	microtraitrule-rule	microtrait_rule-type	microtrait_rule-substrate	microtrait_trait-name1	microtrait_trait-name2	microtrait_trait-name3	microtrait_trait-version
1	fdhC	('fdhC')	count_by_substrate	formate				production
2	aaeB	('aaeB')	count_by_substrate	hydroxybenzoate				development
3	aap_full	('aapJ' & 'aapQ' & 'aapM' & 'aapP')	count_by_substrate	amino acid				development
4	aap_key	('aapJ')	count_by_substrate	amino acid				production
5	abgT	('abgT')	count_by_substrate	aminobenzoyl-glutamate				development
6	acrD	('acrD')	count_by_substrate	drug				development
7	acrF	('acrF')	count_by_substrate	drug				development
8	actP	('actP')	count_by_substrate	acetate				production
9	ade_full	('adeB' & 'adeC')	count_by_substrate	drug				development
10	ade_partial	('adeB' | 'adeC')	count_by_substrate	drug				development
11	adiC	('adiC')	count_by_substrate	arginine				production
12	afu_full	('afuA' & 'afuB' & 'afuC')	count_by_substrate	iron				development
13	afu_key	('afuA')	count_by_substrate	iron				production
14	aga_full	('agaEIIA' & 'agaEIIB' & 'agaEIIC' & 'agaEIID')	count_by_substrate	acetylgalactosamine				development
15	aga_partial	('agaEIIA' | 'agaEIIB' | 'agaEIIC' | 'agaEIID')	count_by_substrate	acetylgalactosamine				production
16	agl_full	('aglE' & 'aglF' & 'aglG' & ('aglK' | 'msmX'))	count_by_substrate	trehalose;maltose;sucrose				development
17	agl_key	('aglE')	count_by_substrate	trehalose;maltose;sucrose				production
18	agu_full	('aguE' & 'aguF' & 'aguG')	count_by_substrate	digalacturonate				development
19	agu_key	('aguE')	count_by_substrate	digalacturonate				production
20	algE	('algE')	count_by_substrate	LPS				development
21	allP	('allP')	count_by_substrate	allantoin				production
22	als_full	('alsA' & 'alsB' & 'alsC')	count_by_substrate	allose				development
23	als_key	('alsB')	count_by_substrate	allose				production
24	ameC	('ameC')	count_by_substrate	lipooligosaccharide				development
25	amiS	('amiS')	count_by_substrate	amide				production
26	ampG	('ampG')	count_by_substrate	drug				development
27	amsL	('amsL')	count_by_substrate	LPS				development
28	amt	('amt')	count_by_substrate	ammonium				production
29	ansP	('ansP')	count_by_substrate	asparagine				production
30	aot_full	('aotJ' & 'aotM' & 'aotQ' & 'aotP')	count_by_substrate	arginine;ornithine				development
31	aot_key	('aotJ')	count_by_substrate	arginine;ornithine				production
32	ara-1_full	('araN' & 'araP' & 'araQ' & 'msmX')	count_by_substrate	arabinosaccharide				development
33	ara-1_key	('araN')	count_by_substrate	arabinosaccharide				production
34	ara-2_full	('araF' & 'araG' & 'araH')	count_by_substrate	arabinose				development
35	ara-2_key	('araF')	count_by_substrate	arabinose				production
36	araE	('araE')	count_by_substrate	arabinose				production
37	araJ	('araJ')	count_by_substrate	arabinose				production
38	arcD	('arcD')	count_by_substrate	arginine				production
39	arg_full	('arg1' & 'arg2' & 'arg3' & 'arg4')	count_by_substrate	valine;alanine;histidine;arginine;lysine				development
40	arg_key	('arg1')	count_by_substrate	valine;alanine;histidine;arginine;lysine				production
41	argT	('argT')	count_by_substrate	arginine;histidine;lysine;ornithine				production
42	arnE	('arnE')	count_by_substrate	LPS				development
43	arsB-1	('arsB1')	count_by_substrate	arsenic				development
44	arsB-2	('arsB2')	count_by_substrate	arsenite				development
45	art-1_full	('artJ' & 'artI' & 'artM' & 'artQ1' & 'artP1')	count_by_substrate	arginine				development
46	art-1_partial	('artJ' | 'artI')	count_by_substrate	arginine				production
47	art-2_full	('artQ2' & 'artP2' & 'artR')	count_by_substrate	arginine;lysine;histidine				development
48	art-2_key	('artP2')	count_by_substrate	arginine;lysine;histidine				production
49	asc_full	('ascEIIB' & 'ascEIIC')	count_by_substrate	cellobiose				development
50	asc_partial	('ascEIIB' | 'ascEIIC')	count_by_substrate	cellobiose				production
51	atoE_key	('atoE')	count_by_substrate	fatty acid				production
52	att_full	('attA1' & 'attB' & 'attC' & 'attA2')	count_by_substrate	mannopine				development
53	att_key	('attC')	count_by_substrate	mannopine				production
54	bce_full	('bceA' & 'bceB')	count_by_substrate	drug				development
55	bce_key	('bceB')	count_by_substrate	drug				development
56	bcr_full	('bcrA' & 'bcrB')	count_by_substrate	drug				development
57	bcr_key	('bcrB')	count_by_substrate	drug				development
58	benE	('benE')	count_by_substrate	benzoate				production
59	betL	('betL')	count_by_substrate	glycine betaine				production
60	betT	('betT')	count_by_substrate	choline;glycine;proline betaine				production
61	bgl_full	('bglEIIA' & 'bglEIIB' & 'bglEIIC')	count_by_substrate	glucoside				development
62	bgl_partial	('bglEIIA' | 'bglEIIB' | 'bglEIIC')	count_by_substrate	glucoside				production
63	bglH	('bglH')	count_by_substrate	cellobiose;gentibiose;arbutin;salicin				production
64	bgt_full	('bgtB' & 'bgtA')	count_by_substrate	arginine;lysine;histidine;glutamine				development
65	bgt_key	('bgtB')	count_by_substrate	arginine;lysine;histidine;glutamine				production
66	bica	('bica')	count_by_substrate	drug				development
67	bio-1_full	('bioY' & 'bioN' & 'bioM')	count_by_substrate	biotin				development
68	bio-1_key	('bioY')	count_by_substrate	biotin				production
69	bio-2_full	('bioY' & 'ecfT' & ('ecfA1' | 'ecfA2'))	count_by_substrate	biotin				development
70	bio-2_key	('bioY')	count_by_substrate	biotin				production
71	blpA	('blpA')	count_by_substrate	bacteriocin				development
72	bpeEF-oprC_full	('bpeE' & 'bpeF' & 'oprC')	count_by_substrate	drug				development
73	bpeEF-oprC_partial	('bpeE' | 'bpeF' | 'oprC')	count_by_substrate	drug				development
74	bra_full	('braD' & 'braE')	count_by_substrate	drug				development
75	bra_partial	('braD' | 'braE')	count_by_substrate	drug				development
76	btu_full	('btuC' & 'btuD' & 'btuF')	count_by_substrate	vitamin B12				development
77	btu_key	('btuF')	count_by_substrate	vitamin B12				production
78	btuB	('btuB')	count_by_substrate	vitamin B12				production
79	bxl_full	('bxlE' & 'bxlF' & 'bxlG')	count_by_substrate	xylobiose				development
80	bxl_key	('bxlE')	count_by_substrate	xylobiose				production
81	cbi-1_full	('cbiM' & 'cbiN' & 'cbiO' & 'cbiQ')	count_by_substrate	nickel				development
82	cbi-1_partial	('cbiM' | 'cbiN' | 'cbiQ')	count_by_substrate	nickel				production
83	cbi-2_full	('cbiK' & ('cbiN' | 'cbiL') & 'cbiM' & 'cbiQ' & 'cbiO')	count_by_substrate	nickel				development
84	cbi-2_key	('cbiK')	count_by_substrate	nickel				production
85	ccm-1_full	('ccmD' & 'ccmB' & 'ccmC' & 'ccmA')	count_by_substrate	heme				development
86	ccm-1_partial	('ccmD' | 'ccmB' | 'ccmC' | 'ccmA')	count_by_substrate	heme				development
87	ceb_full	('cebE' & 'cebF' & 'cebG' & 'msmX')	count_by_substrate	cellobiose				development
88	ceb_key	('cebE')	count_by_substrate	cellobiose				production
89	cel_full	('celEIIA' & 'celEIIB' & 'celEIIC')	count_by_substrate	cellobiose				development
90	cel_partial	('celEIIA' | 'celEIIB' | 'celEIIC')	count_by_substrate	cellobiose				production
91	cfrA	('cfrA')	count_by_substrate	siderophore				production
92	chaA	('chaA')	count_by_substrate	calcium				production
93	chi_full	('chiE' & 'chiF' & 'chiG')	count_by_substrate	chitobiose				development
94	chi_key	('chiE')	count_by_substrate	chitobiose				production
95	chrA	('chrA')	count_by_substrate	chromate				development
96	citA	('citA')	count_by_substrate	citrate				production
97	citT	('citT')	count_by_substrate	citrate				production
98	cmlA	('cmlA')	count_by_substrate	drug;arabinose				development
99	cmp_full	('cmpB' & 'cmpA' & 'cmpC' & 'cmpD')	count_by_substrate	bicarbonate				development
100	cmp_key	('cmpA')	count_by_substrate	bicarbonate				production
101	codB	('codB')	count_by_substrate	cytosine				production
102	corA	('corA')	count_by_substrate	magnesium				production
103	cusA	('cusA')	count_by_substrate	copper;silver				development
104	cusC	('cusC')	count_by_substrate	copper;silver				development
105	cycA	('cycA')	count_by_substrate	serine;alanine;glycine				production
106	cyd_full	('cydC' & 'cydD' & 'cydCD')	count_by_substrate	thiol				development
107	cyd_partial	('cydC' | 'cydD' | 'cydCD')	count_by_substrate	thiol				development
108	cys_full	('sbp' & 'cysU' & 'cysA' & 'cysW' & 'cysP')	count_by_substrate	sulfate				development
109	cys_partial	('sbp' | 'cysP')	count_by_substrate	sulfate				production
110	czcA	('czcA')	count_by_substrate	cobalt;zinc;cadmium				development
111	czcC	('czcC')	count_by_substrate	cobalt;zinc;cadmium				development
112	czcD	('czcD')	count_by_substrate	cobalt;zinc;cadmium;nickel				development
113	das_full	('dasC' & 'dasB' & 'dasA')	count_by_substrate	N,N'-diacetylchitobiose				development
114	das_key	('dasA')	count_by_substrate	N,N'-diacetylchitobiose				production
115	dct_full	('dctQ' & 'dctP' & 'dctM')	count_by_substrate	dicarboxylate				development
116	dct_key	('dctP')	count_by_substrate	dicarboxylate				production
117	dctA	('dctA')	count_by_substrate	fumarate;malate;succinamide				production
118	dcuA	('dcuA')	count_by_substrate	fumarate;succinate;malate				production
119	dcuB	('dcuB')	count_by_substrate	fumarate;succinate;malate				production
120	dcuC	('dcuC')	count_by_substrate	dicarboxylate				production
121	dev_full	('devC' & 'devA' & 'devB' & 'hgdD')	count_by_substrate	glycolipid				development
122	dev_partial	('devC' | 'devA' | 'devB' | 'hgdD')	count_by_substrate	glycolipid				development
123	dga_full	('dgaEIIA' & 'dgaEIIB' & 'dgaEIIC' & 'dgaEIID')	count_by_substrate	glucosaminate				development
124	dga_partial	('dgaEIIA' | 'dgaEIIB' | 'dgaEIIC' & 'dgaEIID')	count_by_substrate	glucosaminate				production
125	dgl_full	('dglEIIA' & 'dglEIIB' & 'dglEIIC')	count_by_substrate	glucosamine				development
126	dgl_partial	('dglEIIA' | 'dglEIIB' | 'dglEIIC')	count_by_substrate	glucosamine				production
127	dltB	('dltB')	count_by_substrate	alanine				production
128	dpp-1_full	('dppA1' & 'dppB1' & 'dppC1' & 'dppD1' & 'dppF1')	count_by_substrate	dipeptide				development
129	dpp-1_key	('dppA1')	count_by_substrate	dipeptide				production
130	dpp-2_full	('dppB2' & 'dppC2' & 'dppD2' & 'dppE')	count_by_substrate	dipeptide				development
131	dpp-2_key	('dppE')	count_by_substrate	dipeptide				production
132	dsdX	('dsdX')	count_by_substrate	serine				production
133	eamA	('eamA')	count_by_substrate	cysteine				development
134	eamB	('eamB')	count_by_substrate	cysteine				development
135	ebr-1_full	('ebrA' & 'ebrB')	count_by_substrate	drug				development
136	ebr-1_partial	('ebrA' | 'ebrB')	count_by_substrate	drug				development
137	ebr-2	('ebr')	count_by_substrate	drug				development
138	ecfA1	('ecfA1')	count_by_substrate	biotin;riboflavin				production
139	eexD_key	('eexD')	count_by_substrate	mannuronan				development
140	efeB	('efeB')	count_by_substrate	iron				production
141	efeO	('efeO')	count_by_substrate	iron				production
142	emrK	('emrK')	count_by_substrate	drug;cysteine				development
143	emrY	('emrY')	count_by_substrate	long-chain fatty acid				development
144	entS	('entS')	count_by_substrate	siderophore				development
145	eps_full	('epsE' & 'epsF')	count_by_substrate	LPS				development
146	eps_partial	('epsE' | 'epsF')	count_by_substrate	LPS				development
147	ery_full	('eryG' & 'eryF' & 'eryE')	count_by_substrate	erythritol				development
148	ery_key	('eryG')	count_by_substrate	erythritol				production
149	exb_full	('exbB' & 'exbD')	count_by_substrate	biopolymer				development
150	exb_key	('exbB' | 'exbD')	count_by_substrate	biopolymer				production
151	exbD_full	('exbB' | 'exbD')	count_by_substrate	biopolymer				development
152	exbD_key	('exbB' | 'exbD')	count_by_substrate	biopolymer				production
153	exoF	('exoF')	count_by_substrate	LPS				development
154	exoT	('exoT')	count_by_substrate	glycan				development
155	fadL	('fadL')	count_by_substrate	long-chain fatty acid				production
156	fdhC	('fdhC')	count_by_substrate	formate				production
157	fec_full	('fecE' & 'fecB' & 'fecD' & 'fecC')	count_by_substrate	Fe(III) dicitrate				development
158	fec_key	('fecB')	count_by_substrate	Fe(III) dicitrate				production
159	fecA	('fecA')	count_by_substrate	Fe(III) dicitrate				production
160	fep_full	('fepC' & 'fepG' & 'fepD' & 'fepB')	count_by_substrate	Fe-enterobactin				development
161	fep_key	('fepB')	count_by_substrate	Fe-enterobactin				production
162	fepA	('fepA')	count_by_substrate	siderophore				production
163	fev_full	('fevA' & 'fevP' & 'fevS')	count_by_substrate	iron				development
164	fev_key	('fevS')	count_by_substrate	iron				production
165	fhu_full	('fhuC' & 'fhuB' & 'fhuD')	count_by_substrate	Fe(III) hydroxamate				development
166	fhu_key	('fhuD')	count_by_substrate	Fe(III) hydroxamate				production
167	fieF	('fieF')	count_by_substrate	zinc;cadmium;mercury;iron				development
168	fiu	('fiu')	count_by_substrate	siderophore				production
169	flq_full	('flqA' & 'flqB' & 'flqC')	count_by_substrate	drug				development
170	flq_partial	('flqA' | 'flqB' | 'flqC')	count_by_substrate	drug				development
171	focA	('focA')	count_by_substrate	formate				production
172	focB	('focB')	count_by_substrate	formate				production
173	fpvA	('fpvA')	count_by_substrate	siderophore				production
174	frc_full	('frcA' & 'frcB' & 'frcC')	count_by_substrate	fructose				development
175	frc_key	('frcB')	count_by_substrate	fructose				production
176	fru1_full	('fru1EIIA' & 'fru1EIIB' & 'fru1EIIC' & 'levG')	count_by_substrate	fructose				development
177	fru1_partial	('fru1EIIA' | 'fru1EIIB' | 'fru1EIIC' & 'levG')	count_by_substrate	fructose				production
178	fru2_full	('fru2EIIA' & 'fru2EIIB' & 'fru2EIIC')	count_by_substrate	fructose				development
179	fru2_partial	('fru2EIIA' | 'fru2EIIB' | 'fru2EIIC')	count_by_substrate	fructose				production
180	ftrA	('ftrA')	count_by_substrate	iron				production
181	gal_full	('galEIIA' & 'galEIIB' & 'galEIIC')	count_by_substrate	galactose				development
182	gal_partial	('galEIIA' | 'galEIIB' | 'galEIIC')	count_by_substrate	galactose				production
183	galP	('galP')	count_by_substrate	galactose				production
184	gam_full	('gamEIIB' & 'gamEIIC' & 'gamEIID')	count_by_substrate	galactosamine				development
185	gam_partial	('gamEIIB' | 'gamEIIC' | 'gamEIID')	count_by_substrate	galactosamine				production
186	gan_full	('ganO' & 'ganP' & 'ganQ' & ('malK' | 'msmX'))	count_by_substrate	arabinogalactan;maltooligosaccharide				development
187	gan_key	('ganO')	count_by_substrate	arabinogalactan;maltooligosaccharide				production
188	gat_full	('gatEIIA' & 'gatEIIB' & 'gatEIIC')	count_by_substrate	galactitol				development
189	gat_partial	('gatEIIA' | 'gatEIIB' | 'gatEIIC')	count_by_substrate	galactitol				production
190	gesB	('gesB')	count_by_substrate	copper;gold				development
191	gfr_full	('gfrEIIA' & 'gfrEIIB' & 'gfrEIIC' & 'gfrEIID')	count_by_substrate	fructoselysine;glucoselysine				development
192	gfr_partial	('gfrEIIA' | 'gfrEIIB' | 'gfrEIIC' & 'gfrEIID')	count_by_substrate	fructoselysine;glucoselysine				production
193	ggu_full	('gguA' & 'gguP' & 'gguS')	count_by_substrate	sugar				development
194	ggu_key	('gguS')	count_by_substrate	sugar				production
195	glc_full	('glcP' & 'glcP1' & 'glcS' & 'glcA')	count_by_substrate	glucose;arabinose				development
196	glc_key	('glcS')	count_by_substrate	glucose;arabinose				production
197	glc-1_full	('glc1EIIA' & 'glc1EIIB' & 'glc1EIIC')	count_by_substrate	glucose				development
198	glc-1_partial	('glc1EIIA' | 'glc1EIIB' | 'glc1EIIC')	count_by_substrate	glucose				production
199	glc-2_full	('glc2EIIA' & 'glc2EIIB' & 'glc2EIIC')	count_by_substrate	glucose				development
200	glc-2_partial	('glc2EIIA' | 'glc2EIIB' | 'glc2EIIC')	count_by_substrate	glucose				production
201	glcT1	('glcT1')	count_by_substrate	glucose;mannose;xylose				production
202	glcU	('glcU')	count_by_substrate	glucose				production
203	glf	('glf')	count_by_substrate	glucose				production
204	gln_full	('glnH' & 'glnP' & 'glnQ')	count_by_substrate	glutamine				development
205	gln_key	('glnH')	count_by_substrate	glutamine				production
206	glp_full	('glpP' & 'glpQ' & 'glpV' & 'glpS' & 'glpT')	count_by_substrate	glycerol				development
207	glp_key	('glpV')	count_by_substrate	glycerol				production
208	glpF	('glpF')	count_by_substrate	glycerol				production
209	glt_full	('gltI' & 'gltK' & 'gltJ' & 'gltL')	count_by_substrate	glutamate;aspartate				development
210	glt_key	('gltI')	count_by_substrate	glutamate;aspartate				production
211	gltP	('gltP')	count_by_substrate	glutamate;aspartate				production
212	glu_full	('gluB' & 'gluC' & 'gluD' & 'gluA')	count_by_substrate	glutamate				development
213	glu_key	('gluB')	count_by_substrate	glutamate				production
214	glucP	('glucP')	count_by_substrate	glucose				production
215	glv_full	('glvEIIB' & 'glvEIIC')	count_by_substrate	glucoside				development
216	glv_partial	('glvEIIB' | 'glvEIIC')	count_by_substrate	glucoside				production
217	glycA	('glcA')	count_by_substrate	lactate;glycolate				production
218	gntP	('gntP')	count_by_substrate	gluconate;fructuronate				production
219	gntT	('gntT')	count_by_substrate	gluconate				production
220	gntU	('gntU')	count_by_substrate	gluconate				production
221	gsi_full	('gsiC' & 'gsiD' & 'gsiB' & 'gsiA')	count_by_substrate	glutathione				development
222	gsi_key	('gsiB')	count_by_substrate	glutathione				production
223	gts_full	('gtsA' & 'gtsB' & 'gtsC' & 'msmX')	count_by_substrate	glucose;mannose				development
224	gts_key	('gtsA')	count_by_substrate	glucose;mannose				production
225	gut_full	('gutEIIA' & 'gutEIIB' & 'gutEIIC')	count_by_substrate	glucitol;sorbitol				development
226	gut_partial	('gutEIIA' | 'gutEIIB' | 'gutEIIC')	count_by_substrate	glucitol;sorbitol				production
227	gutA	('gutA')	count_by_substrate	sorbitol				production
228	hasA	('hasA')	count_by_substrate	heme				production
229	hasR	('hasR')	count_by_substrate	colicin				production
230	hcaT	('hcaT')	count_by_substrate	maltose				production
231	his_full	('hisJ' & 'hisP' & 'hisQ' & 'hisM')	count_by_substrate	ornithine;arginine;lysine;histidine				development
232	his_key	('hisJ')	count_by_substrate	ornithine;arginine;lysine;histidine				production
233	hpt	('hpt')	count_by_substrate	glucose-6-P				production
234	hrt_full	('hrtA' & 'hrtB')	count_by_substrate	iron				development
235	hrt_key	('hrtB')	count_by_substrate	iron				production
236	hutM	('hutM')	count_by_substrate	histidine				production
237	hutT	('hutT')	count_by_substrate	histidine				production
238	hxt	('hxt')	count_by_substrate	sugar				production
239	idnT	('idnT')	count_by_substrate	gluconate				production
240	ino_full	('inoF' & 'inoG' & 'inoE' & 'inoK')	count_by_substrate	inositol-phosphate				development
241	ino_key	('inoE')	count_by_substrate	inositol-phosphate				production
242	iolF	('iolF')	count_by_substrate	inositol				production
243	itsp-1_full	('ibpA1' & 'iatP1' & 'iatA1')	count_by_substrate	inositol				development
244	itsp-1_key	('ibpA1')	count_by_substrate	inositol				production
245	itsp-2_full	('iatP2' & 'iatA2' & 'ibpA2')	count_by_substrate	inositol				development
246	itsp-2_key	('ibpA2')	count_by_substrate	inositol				production
247	kdgM	('kdgM')	count_by_substrate	oligogalacturonate				production
248	kdgT	('kdgT')	count_by_substrate	deoxygluconate				production
249	kgtP	('kgtP')	count_by_substrate	arabinose				production
250	kps_full	('kpsM' & 'kpsE' & 'kpsT')	count_by_substrate	capsular polysaccharide				development
251	kps_key	('kpsE' | 'kpsT')	count_by_substrate	capsular polysaccharide				development
252	kup	('kup')	count_by_substrate	potassium				production
253	lac-1_full	('lacEIIA' & 'lacEIIB' & 'lacEIIC')	count_by_substrate	lactose				development
254	lac-1_partial	('lacEIIA' | 'lacEIIB' | 'lacEIIC')	count_by_substrate	lactose;arabinose				development
255	lac-2_full	('lacE' & 'lacF' & 'lacG' & 'lacK')	count_by_substrate	lactose;arabinose				development
256	lac-2_key	('lacE')	count_by_substrate	lactose				production
257	lacS	('lacS')	count_by_substrate	lactose;raffinose;galactose				production
258	lacY	('lacY')	count_by_substrate	lactose				production
259	lamB	('lamB')	count_by_substrate	maltooligosaccharide				production
260	lctB	('lctB')	count_by_substrate	potassium				production
261	lctP-1	('lctP1')	count_by_substrate	lactate				production
262	lctP-2	('lctP2')	count_by_substrate	lactate				production
263	leuE	('leuE')	count_by_substrate	leucine				development
264	lhp_full	('lhpM' & 'lhpN' & 'lhpO' & 'lhpP')	count_by_substrate	hydroxyproline				development
265	lhp_key	('lhpP')	count_by_substrate	hydroxyproline				production
266	liv_full	('livG' & 'livF' & 'livH' & 'livM' & 'livK')	count_by_substrate	amino acid				development
267	liv_key	('livK')	count_by_substrate	amino acid				production
268	lpiT	('lplT')	count_by_substrate	lysophospholipid				production
269	lpl_full	('lplC' & 'lplB' & 'lplA')	count_by_substrate	alginate				development
270	lpl_key	('lplA')	count_by_substrate	alginate				production
271	lys_full	('lysX1' & 'lysX2' & 'lysY')	count_by_substrate	lysine				development
272	lys_key	('lysX1')	count_by_substrate	lysine				production
273	lysE	('lysE')	count_by_substrate	lysine;histidine;arginine				development
274	lysP	('lysP')	count_by_substrate	lysine				production
275	macA_full	('macA' & 'macB')	count_by_substrate	drug				development
276	macA_partial	('macA' | 'macB')	count_by_substrate	drug				development
277	macB_full	('macA' & 'macB')	count_by_substrate	drug				development
278	macB_partial	('macA' | 'macB')	count_by_substrate	drug				development
279	maeN	('maeN')	count_by_substrate	malate				production
280	mal-1_full	('malEIIB' & 'malEIIC')	count_by_substrate	maltose				development
281	mal-1_partial	('malEIIB' | 'malEIIC')	count_by_substrate	maltose;maltodextrin				development
282	mal-2_full	('malE' & 'malF' & 'malG' & ('malK' | 'msmX'))	count_by_substrate	maltose;maltodextrin				development
283	mal-2_key	('malE')	count_by_substrate	maltose				production
284	malglc_full	('malglcEIIB' & 'malglcEIIC')	count_by_substrate	maltose;glucose				development
285	malglc_partial	('malglcEIIB' | 'malglcEIIC')	count_by_substrate	maltose;glucose				production
286	malY	('malY')	count_by_substrate	maltose				production
287	man_full	('manEIIA' & 'manEIIB' & 'manEIIC' & 'manEIID')	count_by_substrate	mannose				development
288	man_partial	('manEIIA' | 'manEIIB' | 'manEIIC' & 'manEIID')	count_by_substrate	mannose				production
289	marC	('marC')	count_by_substrate	amino acid				production
290	mdcF	('mdcF')	count_by_substrate	malonate				production
291	mdt_full	('mdtB' & 'mdtC')	count_by_substrate	drug				development
292	mdt_partial	('mdtB' | 'mdtC')	count_by_substrate	drug				development
293	mdtD	('mdtD')	count_by_substrate	drug;arabinose				development
294	mdtF	('mdtF')	count_by_substrate	drug				development
295	mdtO	('mdtO')	count_by_substrate	drug				development
296	mdtP	('mdtP')	count_by_substrate	drug				development
297	melB	('melB')	count_by_substrate	melibiose				production
298	mer_full	('merP' & 'merT')	count_by_substrate	mercury				development
299	mer_partial	('merP' | 'merT')	count_by_substrate	mercury				production
300	merC	('merC')	count_by_substrate	mercury				production
301	merE	('merE')	count_by_substrate	mercury				production
302	met_full	('metN' & 'metI' & 'metQ')	count_by_substrate	methionine				development
303	met_key	('metQ')	count_by_substrate	methionine				production
304	mfs.cp	('mfs.cp')	count_by_substrate	glucose				production
305	mfs.set	('mfs.set')	count_by_substrate	lactose;glucose;galactoside;cellobiose;maltose				development
306	mgl_full	('mglA' & 'mglB' & 'mglC')	count_by_substrate	galactose				development
307	mgl_key	('mglB')	count_by_substrate	galactose				production
308	mgtE	('mgtE')	count_by_substrate	magnesium				production
309	mhpT	('mhpT')	count_by_substrate	arabinose				development
310	mla-1_full	('mlaB' & 'mlaC' & 'mlaF' & 'mlaE' & 'mlaD')	count_by_substrate	phospholipid				development
311	mla-1_partial	('mlaB' | 'mlaC' | 'mlaF' | 'mlaE' | 'mlaD')	count_by_substrate	phospholipid				production
312	mla-2	('mlaA')	count_by_substrate	phospholipid				production
313	mleP	('mleP')	count_by_substrate	malate				production
314	mmpL10	('mmpL10')	count_by_substrate	glycolipid				development
315	mmpL11	('mmpL11')	count_by_substrate	heme				production
316	mmr	('mmr')	count_by_substrate	drug				development
317	mmuP	('mmuP')	count_by_substrate	methylmethionine				production
318	mn_full	('mnA' & 'mnP' & 'mnS')	count_by_substrate	manganese;iron				development
319	mn_key	('mnS')	count_by_substrate	manganese;iron				production
320	mng_full	('mngEIIA' & 'mngEIIB' & 'mngEIIC')	count_by_substrate	glycerate				development
321	mng_partial	('mngEIIA' | 'mngEIIB' | 'mngEIIC')	count_by_substrate	glycerate				production
322	mnh_full	('mnhB' & 'mnhC' & 'mnhE' & 'mnhA' & 'mnhF' & 'mnhG' & 'mnhD')	count_by_substrate	potassium;sodium				development
323	mnh_partial	('mnhB' | 'mnhC' | 'mnhE' | 'mnhA' | 'mnhF' | 'mnhG' | 'mnhD')	count_by_substrate	potassium;sodium				production
324	mnt-1_full	('mntA1' & 'mntB1' & 'mntC1')	count_by_substrate	manganese				development
325	mnt-1_key	('mntC1')	count_by_substrate	manganese				production
326	mnt-2_full	('mntA2' & 'mntB2' & 'mntC2')	count_by_substrate	manganese				development
327	mnt-2_key	('mntC2')	count_by_substrate	manganese				production
328	mntH	('mntH')	count_by_substrate	manganese				production
329	mntP_key	('mntP')	count_by_substrate	manganese				development
330	mod_full	('modF' & 'modC' & 'modB' & 'modA')	count_by_substrate	molybdate				development
331	mod_key	('modA')	count_by_substrate	molybdate				production
332	msbA	('msbA')	count_by_substrate	phospholipid;LPS				development
333	mscL	('mscL')	count_by_substrate	osmolyte				development
334	msm-1_full	('msmE1' & 'msmF1' & 'msmG1' & 'msmX')	count_by_substrate	fructooligosaccharide				development
335	msm-1_key	('msmE1')	count_by_substrate	fructooligosaccharide				production
336	msm-2_full	('msmE2' & 'msmF2' & 'msmG2' & 'msmX')	count_by_substrate	raffinose;stachyose;melibiose				development
337	msm-2_key	('msmE2')	count_by_substrate	raffinose;stachyose;melibiose				production
338	mthK	('mthK')	count_by_substrate	potassium				production
339	mtl-1_full	('mtlEIIA' & 'mtlEIIB' & 'mtlEIIC')	count_by_substrate	sorbitol;mannitol				development
340	mtl-1_partial	('mtlEIIA' | 'mtlEIIB' | 'mtlEIIC')	count_by_substrate	sorbitol;mannitol				development
341	mtl-2_full	('mtlE' & 'mtlF' & 'mtlG' & ('malK' | 'msmX'))	count_by_substrate	sorbitol;mannitol				development
342	mtl-2_partial	('mtlE')	count_by_substrate	mannitol				production
343	mtr-2	('mtr')	count_by_substrate	tryptophan				production
344	mtrD	('mtrD')	count_by_substrate	drug				development
345	mts_full	('mtsA' & 'mtsB' & 'mtsC')	count_by_substrate	iron;zinc;manganese;copper				development
346	mts_key	('mtsA')	count_by_substrate	iron;zinc;manganese;copper				production
347	mur_full	('murEIIB' & 'murEIIC')	count_by_substrate	acetylmuramic acid				development
348	mur_partial	('murEIIB' | 'murEIIC')	count_by_substrate	acetylmuramic acid				production
349	nag_full	('nagEIIA' & 'nagEIIB' & 'nagEIIC')	count_by_substrate	acetylglucosamine				development
350	nag_partial	('nagEIIA' | 'nagEIIB' | 'nagEIIC')	count_by_substrate	acetylglucosamine				production
351	nat-1_full	('natA' & 'natB')	count_by_substrate	sodium				development
352	nat-1_key	('natB')	count_by_substrate	sodium				production
353	nat-2_full	('natB1' & 'natC' & 'natD1' & 'natA1' & 'natE')	count_by_substrate	amino acid				development
354	nat-2_key	('natB1')	count_by_substrate	amino acid				production
355	nepI	('nepI')	count_by_substrate	ribonucleoside				development
356	ngc_full	('ngcE' & 'ngcF' & 'ngcG')	count_by_substrate	acetylglucosamine				development
357	ngc_key	('ngcE')	count_by_substrate	acetylglucosamine				production
358	nhaA	('nhaA')	count_by_substrate	sodium				production
359	nhaB	('nhaB')	count_by_substrate	sodium				production
360	nhaC	('nhaC')	count_by_substrate	sodium				production
361	niaX	('niaX')	count_by_substrate	vitamin B				production
362	nik_full	('nikA' & 'nikB' & 'nikC' & 'nikD' & 'nikE')	count_by_substrate	nickel				development
363	nik_key	('nikA')	count_by_substrate	nickel				production
364	nirC	('nirC')	count_by_substrate	nitrite				production
365	nis_full	('nisG' & 'nisE' & 'nisF')	count_by_substrate	drug				development
366	nis_partial	('nisG' | 'nisE' | 'nisF')	count_by_substrate	drug				development
367	nisA	('nisA')	count_by_substrate	lantibiotic				development
368	nitregulatory_full	('ptsP' & 'ptsO' & 'ntrEIIA')	count_by_substrate	nitrogen				development
369	nitregulatory_partial	('ptsP' & 'ptsO' | 'ntrEIIA')	count_by_substrate	nitrogen				production
370	nixA	('nixA')	count_by_substrate	cobalt;nickel				production
371	nod_full	('nodI' & 'nodJ')	count_by_substrate	LPS				development
372	nod_partial	('nodI' | 'nodJ')	count_by_substrate	LPS				development
373	nos_full	('nosF' & 'nosY')	count_by_substrate	copper				development
374	nos_key	('nosY')	count_by_substrate	copper				production
375	nrsA	('nrsA')	count_by_substrate	cobalt;nickel				development
376	nrt_full	('nrtD' & 'nrtC' & 'nrtB' & 'nrtA')	count_by_substrate	nitrate;nitrite				development
377	nrt_key	('nrtA')	count_by_substrate	nitrate;nitrite				production
378	nuk_full	('nukE' & 'nukF' & 'nukG')	count_by_substrate	drug				development
379	nuk_partial	('nukE' | 'nukF' | 'nukG')	count_by_substrate	drug				development
380	nupC	('nupC')	count_by_substrate	nucleoside				production
381	nupG	('nupG')	count_by_substrate	nucleoside				production
382	nupX	('nupX')	count_by_substrate	nucleoside				production
383	occ_full	('occP' & 'occQ' & 'occM' & 'occT')	count_by_substrate	octopine;nopaline				development
384	occ_key	('occT')	count_by_substrate	octopine;nopaline				production
385	oleC_full	('oleC4' & 'oleC5')	count_by_substrate	drug				development
386	oleC_key	('oleC5')	count_by_substrate	drug				development
387	ompA	('ompA')	count_by_substrate	sugar;amino acid				production
388	opmD_key	('opmD')	count_by_substrate	drug				development
389	opmE	('opmE')	count_by_substrate	drug				development
390	opp-1_full	('oppA1' & 'oppB1' & 'oppC1' & 'oppD1' & 'oppF1')	count_by_substrate	oligopeptide				development
391	opp-1_key	('oppA1')	count_by_substrate	oligopeptide				production
392	oprB	('oprB')	count_by_substrate	glucose;glycerol;mannitol;fructose;maltose;pentose				production
393	oprD	('oprD')	count_by_substrate	lysine;arginine;histidine;proline;tyrosine				production
394	oprN	('oprN')	count_by_substrate	drug				development
395	oprO_P	('oprO_P')	count_by_substrate	phosphate				production
396	opu_and	('opuBD' & 'opuA' & 'opuC')	count_by_substrate	osmolyte				development
397	opu_key	('opuC')	count_by_substrate	osmolyte				development
398	oqxB	('oqxB')	count_by_substrate	drug				development
399	oxlT	('oxlT')	count_by_substrate	oxalate				production
400	pa_full	('pap' & 'pas')	count_by_substrate	amino acid				development
401	pa_partial	('pap' | 'pas')	count_by_substrate	amino acid				production
402	paa	('paa')	count_by_substrate	amino acid				production
403	panF	('panF')	count_by_substrate	pantothenate				production
404	pbuE	('pbuE')	count_by_substrate	nucleoside				development
405	pbuG	('pbuG')	count_by_substrate	guanosine				production
406	peb_full	('peb1A' & 'peb1B' & 'peb1C')	count_by_substrate	aspartate;glutamate;glutamine				development
407	peb_key	('peb1A')	count_by_substrate	aspartate;glutamate;glutamine				production
408	pha_full	('phaC' & 'phaF' & 'phaG' & 'phaE' & 'phaD' & 'phaA')	count_by_substrate	potassium;sodium				development
409	pha_partial	('phaC' | 'phaF' | 'phaG' | 'phaE' | 'phaD' | 'phaA')	count_by_substrate	potassium;sodium				production
410	pheP	('pheP')	count_by_substrate	phenylalanine				production
411	phn-1_full	('phnS' & 'phnV' & 'phnU' & 'phnT')	count_by_substrate	aminoethylphosphonate				development
412	phn-1_partial	('phnS' | 'phnV' | 'phnU' | 'phnT')	count_by_substrate	aminoethylphosphonate				production
413	phn-2_full	('phnC' & 'phnE' & 'phnD')	count_by_substrate	phosphonate				development
414	phn-2_partial	('phnC' | 'phnE' | 'phnD')	count_by_substrate	phosphonate				production
415	pho84	('PHO84')	count_by_substrate	phosphate				production
416	phoE	('phoE')	count_by_substrate	phosphate				production
417	pit	('pit')	count_by_substrate	phosphate				production
418	pro_and	('proW' & 'proV' & 'proX')	count_by_substrate	osmolyte				development
419	pro_key	('proX')	count_by_substrate	osmolyte				development
420	proP	('proP')	count_by_substrate	glycine betaine;proline				production
421	proY	('proY')	count_by_substrate	proline				production
422	pslD	('pslD')	count_by_substrate	polysaccharide				development
423	pst_full	('pstC' & 'pstA' & 'pstB' & 'pstS')	count_by_substrate	phosphate				development
424	pst_partial	('pstC' | 'pstA' | 'pstB' | 'pstS')	count_by_substrate	phosphate				production
425	psuT	('psuT')	count_by_substrate	nucleoside				production
426	pucJ	('pucJ')	count_by_substrate	uric acid				production
427	putP	('putP')	count_by_substrate	proline				production
428	puuP	('puuP')	count_by_substrate	putrescine				production
429	pvdE	('pvdE')	count_by_substrate	siderophore				development
430	rbs_full	('rbsA' & 'rbsB' & 'rbsC')	count_by_substrate	ribose				development
431	rbs_key	('rbsB')	count_by_substrate	ribose				production
432	rbsU	('rbsU')	count_by_substrate	glucose				production
433	rcnA	('rcnA')	count_by_substrate	cobalt;nickel				production
434	rha-1_full	('rhaP' & 'rhaQ' & 'rhaS' & 'rhaT1')	count_by_substrate	rhamnose				development
435	rha-1_key	('rhaS')	count_by_substrate	rhamnose				production
436	rha-2	('rhaT2')	count_by_substrate	rhamnose				production
437	rhtA	('rhtA')	count_by_substrate	threonine;homoserine				development
438	rhtB	('rhtB')	count_by_substrate	homoserine				development
439	rhtC	('rhtC')	count_by_substrate	threonine				development
440	rib_full	('ribS' & 'ribP')	count_by_substrate	riboflavin				development
441	rib_partial	('ribS' | 'ribP')	count_by_substrate	riboflavin				production
442	rocE	('rocE')	count_by_substrate	arginine;ornithine				production
443	rutG	('rutG')	count_by_substrate	pyrimidine				production
444	sam	('sam')	count_by_substrate	riboflavin				production
445	sap_full	('sapA' & 'sapB' & 'sapC' & 'sapD' & 'sapF')	count_by_substrate	peptide				development
446	sap_key	('sapA')	count_by_substrate	peptide				production
447	satP	('satP')	count_by_substrate	acetate;succinate				production
448	scr_full	('scrEIIA' & 'scrEIIB' & 'scrEIIC')	count_by_substrate	sucrose				development
449	scr_partial	('scrEIIA' | 'scrEIIB' | 'scrEIIC')	count_by_substrate	sucrose				production
450	scrY	('scrY')	count_by_substrate	sucrose;raffinose;maltooligosaccharide				production
451	sdaC	('sdaC')	count_by_substrate	serine				production
452	sit_full	('sitA' & 'sitB' & 'sitC' & 'sitD')	count_by_substrate	iron;manganese				development
453	sit_key	('sitA')	count_by_substrate	iron;manganese				production
454	sme_full	('smeB' & 'smeC')	count_by_substrate	drug				development
455	sme_partial	('smeB' | 'smeC')	count_by_substrate	drug				development
456	sor_full	('sorEIIA' & 'sorEIIB' & 'sorEIIC' & 'sorEIID')	count_by_substrate	sorbose				development
457	sor_partial	('sorEIIA' | 'sorEIIB' | 'sorEIIC' & 'sorEIID')	count_by_substrate	sorbose				production
458	sotB	('sotB')	count_by_substrate	arabinose				development
459	sstT	('sstT')	count_by_substrate	serine;threonine				production
460	ssu_full	('ssuB' & 'ssuC' & 'ssuA')	count_by_substrate	sulfonate				development
461	ssu_key	('ssuA')	count_by_substrate	sulfonate				production
462	ste_full	('steA' & 'steB')	count_by_substrate	drug				development
463	ste_partial	('steA' | 'steB')	count_by_substrate	drug				development
464	sug-1_full	('sugP' & 'sugP1' & 'sugS1')	count_by_substrate	sugar				development
465	sug-1_partial	('sugP' | 'sugP1' | 'sugS1')	count_by_substrate	sugar				production
466	sug-2_full	('sugA' & 'sugP2' & 'sugS2')	count_by_substrate	sugar				development
467	sug-2_partial	('sugA' | 'sugP2' | 'sugS2')	count_by_substrate	sugar				production
468	syrD	('syrD')	count_by_substrate	drug				development
469	tag_full	('tagH' & 'tagG')	count_by_substrate	teichoic acid				development
470	tag_key	('tagG')	count_by_substrate	teichoic acid				production
471	tau_full	('tauB' & 'tauC' & 'tauA')	count_by_substrate	taurine				development
472	tau_key	('tauA')	count_by_substrate	taurine				production
473	tc_2.A.76.1.6	('tc_2.A.76.1.6')	count_by_substrate	amino acid				development
474	tc.aat	('tc.aat')	count_by_substrate	alanine;serine;glycine				production
475	tc.agcs	('tc.agcs')	count_by_substrate	alanine;glycine				production
476	tc.apa	('tc.apa')	count_by_substrate	amino acid				production
477	tc.bat2	('tc.bat2')	count_by_substrate	serine				development
478	tc.citmhs	('tc.citmhs')	count_by_substrate	calcium				production
479	tc.cnt	('tc.cnt')	count_by_substrate	nucleoside				production
480	tc.dass	('tc.dass')	count_by_substrate	citrate				production
481	tc.dme	('TC.DME')	count_by_substrate	drug				development
482	tc.fev	('tc.fev')	count_by_substrate	iron				production
483	tc.gntp	('TC.GNTP')	count_by_substrate	gluconate				production
484	tc.gph	('tc.gph')	count_by_substrate	sugar				production
485	tc.hae1	('TC.HAE1')	count_by_substrate	LPS				development
486	tc.livcs	('tc.livcs')	count_by_substrate	amino acid				production
487	tc.ncs1	('tc.ncs1')	count_by_substrate	nucleotide				production
488	tc.ncs2	('tc.ncs2')	count_by_substrate	purine				production
489	tc.nss	('tc.nss')	count_by_substrate	tryptophan				production
490	tc.pot	('tc.pot')	count_by_substrate	peptide				production
491	tc.sss	('tc.sss')	count_by_substrate	proline				production
492	tc.sulp	('tc.sulp')	count_by_substrate	fumarate				production
493	tc2.A.86.1.7	('tc2.A.86.1.7')	count_by_substrate	heme				production
494	tct_full	('tctB' & 'tctC' & 'tctA')	count_by_substrate	tricarboxylate				development
495	tct_partial	('tctB' | 'tctC' | 'tctA')	count_by_substrate	tricarboxylate				production
496	tcy-1_full	('tcyA' & 'tcyB' & 'tcyC')	count_by_substrate	amino acid				development
497	tcy-1_key	('tcyA')	count_by_substrate	amino acid				production
498	tcy-2_full	('tcyJ' & 'tcyK' & 'tcyL' & 'tcyM' & 'tcyN')	count_by_substrate	amino acid				development
499	tcy-2_partial	('tcyJ' | 'tcyK')	count_by_substrate	amino acid				production
500	tdcC	('tdcC')	count_by_substrate	threonine				production
501	tehA	('tehA')	count_by_substrate	tellurite				development
502	tet35	('tet35')	count_by_substrate	drug				development
503	thi_full	('thiQ' & 'thiP' & 'thiB')	count_by_substrate	thiamine				development
504	thi_key	('thiB')	count_by_substrate	thiamine				production
505	thiT	('thiT')	count_by_substrate	thiamine				production
506	thu_full	('thuE' & 'thuF' & 'thuG' & 'malK')	count_by_substrate	trehalose;maltose;sucrose;palatinose				development
507	thu_key	('thuE')	count_by_substrate	trehalose;maltose;sucrose;palatinose				production
508	tnaB	('tnaB')	count_by_substrate	tryptophan				production
509	tog_full	('togA' & 'togM' & 'togN' & 'togB')	count_by_substrate	oligogalacturonide				development
510	tog_key	('togB')	count_by_substrate	oligogalacturonide				production
511	togT	('togT')	count_by_substrate	oligogalacturonide				production
512	tol_full	('tolQ' & 'tolR')	count_by_substrate	biopolymer				development
513	tol_partial	('tolQ' | 'tolR')	count_by_substrate	biopolymer				production
514	treE_full	('treEIIA' & 'treEIIB' & 'treEIIC')	count_by_substrate	trehalose				development
515	treE_partial	('treEIIA' | 'treEIIB' | 'treEIIC')	count_by_substrate	trehalose				production
516	triC	('triC')	count_by_substrate	drug				development
517	trkA	('trkA')	count_by_substrate	potassium				production
518	trkH	('trkH')	count_by_substrate	potassium				production
519	tro_full	('troA' & 'troB' & 'troC' & 'troD')	count_by_substrate	iron;zinc;manganese				development
520	tro_key	('troA')	count_by_substrate	iron;zinc;manganese				production
521	trp_full	('trpA' & 'trpP' & 'trpS')	count_by_substrate	tryptophan				development
522	trp_key	('trpS')	count_by_substrate	tryptophan				production
523	tsx	('tsx')	count_by_substrate	nucleoside				production
524	ttdT	('ttdT')	count_by_substrate	tartrate				production
525	tuaB	('tuaB')	count_by_substrate	teichuronic acid				development
526	tup_full	('tupA' & 'tupB' & 'tupC')	count_by_substrate	tungstate				development
527	tup_key	('tupA')	count_by_substrate	tungstate				production
528	tutB	('tutB')	count_by_substrate	tyrosine				production
529	tyrP	('tyrP')	count_by_substrate	tyrosine				production
530	ugp_and	('ugpC' & 'ugpE' & 'ugpA' & 'ugpB')	count_by_substrate	osmolyte				development
531	ugp_key	('ugpB')	count_by_substrate	osmolyte				development
532	uhpC	('uhpC')	count_by_substrate	hexose				production
533	uid-1	('uidC')	count_by_substrate	glucuronide				production
534	uid-2	('uidB')	count_by_substrate	glucuronide				production
535	ula_full	('ulaEIIA' & 'ulaEIIB' & 'ulaEIIC')	count_by_substrate	ascorbate				development
536	ula_partial	('ulaEIIA' | 'ulaEIIB' | 'ulaEIIC')	count_by_substrate	ascorbate				production
537	uraA	('uraA')	count_by_substrate	uracil				production
538	urt_full	('urtB' & 'urtD' & 'urtE' & 'urtA' & 'urtC')	count_by_substrate	urea				development
539	urt_key	('urtA')	count_by_substrate	urea				production
540	utp	('utp')	count_by_substrate	urea				production
541	vb1x_and	('vb1xA' & 'vb1xS' & 'vb1xP')	count_by_substrate	osmolyte				development
542	vb1x_key	('vb1xS')	count_by_substrate	osmolyte				development
543	vex_full	('vexB' & 'vexD' & 'vexC')	count_by_substrate	LPS				development
544	vex_key	('vexB' | 'vexD')	count_by_substrate	LPS				development
545	vexA	('vexA')	count_by_substrate	LPS				development
546	vexF	('vexF')	count_by_substrate	drug				development
547	vpsM	('vpsM')	count_by_substrate	LPS				development
548	vpsN	('vpsN')	count_by_substrate	LPS				development
549	wtp_full	('wtpA' & 'wtpB' & 'wtpC')	count_by_substrate	molybdate;tungstate				development
550	wtp_key	('wtpA')	count_by_substrate	molybdate;tungstate				production
551	wza	('wza')	count_by_substrate	LPS				development
552	wzxC	('wzxC')	count_by_substrate	LPS				development
553	xanP	('xanP')	count_by_substrate	xanthine				production
554	xanQ	('xanQ')	count_by_substrate	xanthine				production
555	xapB	('xapB')	count_by_substrate	xanthosine				production
556	xlt_full	('xltA' & 'xltB' & 'xltC')	count_by_substrate	xylitol				development
557	xlt_key	('xltC')	count_by_substrate	xylitol				production
558	xyl_full	('xylF' & 'xylG' & 'xylH')	count_by_substrate	xylose				development
559	xyl_key	('xylF')	count_by_substrate	xylose				production
560	xylE	('xylE')	count_by_substrate	xylose				production
561	yad_full	('yadH' & 'yadG')	count_by_substrate	drug				development
562	yad_partial	('yadH' | 'yadG')	count_by_substrate	drug				development
563	yahN	('yahN')	count_by_substrate	amino acid				development
564	ydjE	('ydjE')	count_by_substrate	vitamin B				production
565	yia_full	('yiaN' & 'yiaM' & 'yiaO')	count_by_substrate	dicarboxylate				development
566	yia_partial	('yiaN' | 'yiaM' | 'yiaO')	count_by_substrate	dicarboxylate				production
567	yjbB	('yjbB')	count_by_substrate	phosphate				production
568	yjeH	('yjeH')	count_by_substrate	amino acid				development
569	ykk_full	('ykkC' & 'ykkD')	count_by_substrate	drug				development
570	ykk_partial	('ykkC' | 'ykkD')	count_by_substrate	drug				development
571	ylnA	('ylnA')	count_by_substrate	sulfate				production
572	ynfM	('ynfM')	count_by_substrate	arabinose				development
573	yojI	('yojI')	count_by_substrate	drug				development
574	yqgE	('yqgE')	count_by_substrate	alanine				production
575	yrbG	('yrbG')	count_by_substrate	calcium				production
576	ytr_full	('ytrB' & 'ytrE' & 'ytrF' & 'ytrC_D')	count_by_substrate	acetoin				development
577	ytr_partial	('ytrB' | 'ytrE' | 'ytrF' | 'ytrC_D')	count_by_substrate	acetoin				production
578	yuiF	('yuiF')	count_by_substrate	histidine				production
579	yxjA	('yxjA')	count_by_substrate	purine				production
580	yyd_full	('yydI' & 'yydJ')	count_by_substrate	antimicrobial peptide				development
581	yyd_partial	('yydI' | 'yydJ')	count_by_substrate	antimicrobial peptide				development
582	zipB	('zipB')	count_by_substrate	zinc;cadmium				production
583	zm_full	('zmA' & 'zmP' & 'zmS')	count_by_substrate	zinc;manganese				development
584	zm_key	('zmS')	count_by_substrate	zinc;manganese				production
585	zntB	('zntB')	count_by_substrate	zinc				production
586	znu_full	('znuA' & 'znuB' & 'znuC')	count_by_substrate	zinc				development
587	znu_key	('znuA')	count_by_substrate	zinc				production
588	GH1	('GH1')	count_by_substrate	xylan and heteroxylan				production
589	GH2	('GH2')	count_by_substrate	xylan and heteroxylan				production
590	GH3	('GH3')	count_by_substrate	cellulose;chitin;xylan and heteroxylan				production
591	GH4	('GH4')	count_by_substrate	xyloglucan				production
592	GH5	('GH5')	count_by_substrate	cellulose;xylan and heteroxylan;heteromannan;mixed linkage glucan				production
593	GH6	('GH6')	count_by_substrate	cellulose				production
594	GH7	('GH7')	count_by_substrate	cellulose				production
595	GH8	('GH8')	count_by_substrate	cellulose;xylan and heteroxylan;mixed linkage glucan				production
596	GH9	('GH9')	count_by_substrate	cellulose;mixed linkage glucan				production
597	GH10	('GH10')	count_by_substrate	xylan and heteroxylan				production
598	GH11	('GH11')	count_by_substrate	xylan and heteroxylan				production
599	GH12	('GH12')	count_by_substrate	cellulose;xyloglucan				production
600	GH16	('GH16')	count_by_substrate	xyloglucan;mixed linkage glucan				production
601	GH18	('GH18')	count_by_substrate	chitin				production
602	GH19	('GH19')	count_by_substrate	chitin				production
603	GH20	('GH20')	count_by_substrate	chitin				production
604	GH23	('GH23')	count_by_substrate	chitin				production
605	GH26	('GH26')	count_by_substrate	heteromannan;mixed linkage glucan				production
606	GH27	('GH27')	count_by_substrate	xyloglucan				production
607	GH30	('GH30')	count_by_substrate	xylan and heteroxylan				production
608	GH31	('GH31')	count_by_substrate	xyloglucan				production
609	GH36	('GH36')	count_by_substrate	xyloglucan				production
610	GH39	('GH39')	count_by_substrate	xylan and heteroxylan				production
611	GH43	('GH43')	count_by_substrate	xylan and heteroxylan				production
612	GH44	('GH44')	count_by_substrate	cellulose;xyloglucan				production
613	GH45	('GH45')	count_by_substrate	cellulose				production
614	GH48	('GH48')	count_by_substrate	cellulose				production
615	GH51	('GH51')	count_by_substrate	cellulose;xylan and heteroxylan				production
616	GH52	('GH52')	count_by_substrate	xylan and heteroxylan				production
617	GH54	('GH54')	count_by_substrate	xylan and heteroxylan				production
618	GH62	('GH62')	count_by_substrate	xylan and heteroxylan				production
619	GH74	('GH74')	count_by_substrate	cellulose;xyloglucan				production
620	GH79	('GH79')	count_by_substrate	xylan and heteroxylan				production
621	GH97	('GH97')	count_by_substrate	xyloglucan				production
622	GH98	('GH98')	count_by_substrate	xylan and heteroxylan				production
623	GH124	('GH124')	count_by_substrate	cellulose				production
624	GH110	('GH110')	count_by_substrate	xyloglucan				production
625	GH113	('GH113')	count_by_substrate	heteromannan				production
626	GH116	('GH116')	count_by_substrate	xylan and heteroxylan				production
627	GH120	('GH120')	count_by_substrate	xylan and heteroxylan				production
628	GH134	('GH134')	count_by_substrate	heteromannan				production
629	ggt	('ggt')	count	NA	Resource Acquisition:Substrate degradation:simple compound degradation	Resource Acquisition:Substrate degradation:simple compound degradation:protein degradation	Resource Acquisition:Substrate degradation:simple compound degradation:protein degradation	production
630	pepA_M17	('pepA_M17')	count	NA	Resource Acquisition:Substrate degradation:simple compound degradation	Resource Acquisition:Substrate degradation:simple compound degradation:protein degradation	Resource Acquisition:Substrate degradation:simple compound degradation:protein degradation	production
631	pepN	('pepN')	count	NA	Resource Acquisition:Substrate degradation:simple compound degradation	Resource Acquisition:Substrate degradation:simple compound degradation:protein degradation	Resource Acquisition:Substrate degradation:simple compound degradation:protein degradation	production
632	pepT	('pepT')	count	NA	Resource Acquisition:Substrate degradation:simple compound degradation	Resource Acquisition:Substrate degradation:simple compound degradation:protein degradation	Resource Acquisition:Substrate degradation:simple compound degradation:protein degradation	production
633	pip	('pip')	count	NA	Resource Acquisition:Substrate degradation:simple compound degradation	Resource Acquisition:Substrate degradation:simple compound degradation:protein degradation	Resource Acquisition:Substrate degradation:simple compound degradation:protein degradation	production
634	pepA_M42	('pepA_M42')	count	NA	Resource Acquisition:Substrate degradation:simple compound degradation	Resource Acquisition:Substrate degradation:simple compound degradation:protein degradation	Resource Acquisition:Substrate degradation:simple compound degradation:protein degradation	production
635	pepP	('pepP')	count	NA	Resource Acquisition:Substrate degradation:simple compound degradation	Resource Acquisition:Substrate degradation:simple compound degradation:protein degradation	Resource Acquisition:Substrate degradation:simple compound degradation:protein degradation	production
636	map	('map')	count	NA	Resource Acquisition:Substrate degradation:simple compound degradation	Resource Acquisition:Substrate degradation:simple compound degradation:protein degradation	Resource Acquisition:Substrate degradation:simple compound degradation:protein degradation	production
637	dmpA	('dmpA')	count	NA	Resource Acquisition:Substrate degradation:simple compound degradation	Resource Acquisition:Substrate degradation:simple compound degradation:protein degradation	Resource Acquisition:Substrate degradation:simple compound degradation:protein degradation	production
638	pepD_M20	('pepD_M20')	count	NA	Resource Acquisition:Substrate degradation:simple compound degradation	Resource Acquisition:Substrate degradation:simple compound degradation:protein degradation	Resource Acquisition:Substrate degradation:simple compound degradation:protein degradation	production
639	pepD_S1	('pepD_S1')	count	NA	Resource Acquisition:Substrate degradation:simple compound degradation	Resource Acquisition:Substrate degradation:simple compound degradation:protein degradation	Resource Acquisition:Substrate degradation:simple compound degradation:protein degradation	production
640	pepQ	('pepQ')	count	NA	Resource Acquisition:Substrate degradation:simple compound degradation	Resource Acquisition:Substrate degradation:simple compound degradation:protein degradation	Resource Acquisition:Substrate degradation:simple compound degradation:protein degradation	production
641	pepX	('pepX')	count	NA	Resource Acquisition:Substrate degradation:simple compound degradation	Resource Acquisition:Substrate degradation:simple compound degradation:protein degradation	Resource Acquisition:Substrate degradation:simple compound degradation:protein degradation	production
642	dcp	('dcp')	count	NA	Resource Acquisition:Substrate degradation:simple compound degradation	Resource Acquisition:Substrate degradation:simple compound degradation:protein degradation	Resource Acquisition:Substrate degradation:simple compound degradation:protein degradation	production
643	cpg	('cpg')	count	NA	Resource Acquisition:Substrate degradation:simple compound degradation	Resource Acquisition:Substrate degradation:simple compound degradation:protein degradation	Resource Acquisition:Substrate degradation:simple compound degradation:protein degradation	production
644	ldcA	('ldcA')	count	NA	Resource Acquisition:Substrate degradation:simple compound degradation	Resource Acquisition:Substrate degradation:simple compound degradation:protein degradation	Resource Acquisition:Substrate degradation:simple compound degradation:protein degradation	production
645	E3.4.17.19	('E3.4.17.19')	count	NA	Resource Acquisition:Substrate degradation:simple compound degradation	Resource Acquisition:Substrate degradation:simple compound degradation:protein degradation	Resource Acquisition:Substrate degradation:simple compound degradation:protein degradation	production
646	pcp	('pcp')	count	NA	Resource Acquisition:Substrate degradation:simple compound degradation	Resource Acquisition:Substrate degradation:simple compound degradation:protein degradation	Resource Acquisition:Substrate degradation:simple compound degradation:protein degradation	production
647	iadA	('iadA')	count	NA	Resource Acquisition:Substrate degradation:simple compound degradation	Resource Acquisition:Substrate degradation:simple compound degradation:protein degradation	Resource Acquisition:Substrate degradation:simple compound degradation:protein degradation	production
648	yqgT	('yqgT')	count	NA	Resource Acquisition:Substrate degradation:simple compound degradation	Resource Acquisition:Substrate degradation:simple compound degradation:protein degradation	Resource Acquisition:Substrate degradation:simple compound degradation:protein degradation	production
649	sspA	('sspA')	count	NA	Resource Acquisition:Substrate degradation:simple compound degradation	Resource Acquisition:Substrate degradation:simple compound degradation:protein degradation	Resource Acquisition:Substrate degradation:simple compound degradation:protein degradation	production
650	E3.4.21.50	('E3.4.21.50')	count	NA	Resource Acquisition:Substrate degradation:simple compound degradation	Resource Acquisition:Substrate degradation:simple compound degradation:protein degradation	Resource Acquisition:Substrate degradation:simple compound degradation:protein degradation	production
651	lon	('lon')	count	NA	Resource Acquisition:Substrate degradation:simple compound degradation	Resource Acquisition:Substrate degradation:simple compound degradation:protein degradation	Resource Acquisition:Substrate degradation:simple compound degradation:protein degradation	production
652	iga_hap	('iga_hap')	count	NA	Resource Acquisition:Substrate degradation:simple compound degradation	Resource Acquisition:Substrate degradation:simple compound degradation:protein degradation	Resource Acquisition:Substrate degradation:simple compound degradation:protein degradation	production
653	ptrB	('ptrB')	count	NA	Resource Acquisition:Substrate degradation:simple compound degradation	Resource Acquisition:Substrate degradation:simple compound degradation:protein degradation	Resource Acquisition:Substrate degradation:simple compound degradation:protein degradation	production
654	clpP	('clpP')	count	NA	Resource Acquisition:Substrate degradation:simple compound degradation	Resource Acquisition:Substrate degradation:simple compound degradation:protein degradation	Resource Acquisition:Substrate degradation:simple compound degradation:protein degradation	production
655	iga_zmpA	('iga_zmpA')	count	NA	Resource Acquisition:Substrate degradation:simple compound degradation	Resource Acquisition:Substrate degradation:simple compound degradation:protein degradation	Resource Acquisition:Substrate degradation:simple compound degradation:protein degradation	production
656	ptrA	('ptrA')	count	NA	Resource Acquisition:Substrate degradation:simple compound degradation	Resource Acquisition:Substrate degradation:simple compound degradation:protein degradation	Resource Acquisition:Substrate degradation:simple compound degradation:protein degradation	production
657	prlC	('prlC')	count	NA	Resource Acquisition:Substrate degradation:simple compound degradation	Resource Acquisition:Substrate degradation:simple compound degradation:protein degradation	Resource Acquisition:Substrate degradation:simple compound degradation:protein degradation	production
658	hslV	('hslV')	count	NA	Resource Acquisition:Substrate degradation:simple compound degradation	Resource Acquisition:Substrate degradation:simple compound degradation:protein degradation	Resource Acquisition:Substrate degradation:simple compound degradation:protein degradation	production
659	bepA	('bepA')	count	NA	Resource Acquisition:Substrate degradation:simple compound degradation	Resource Acquisition:Substrate degradation:simple compound degradation:protein degradation	Resource Acquisition:Substrate degradation:simple compound degradation:protein degradation	production
660	cpaA	('cpaA')	count	NA	Resource Acquisition:Substrate degradation:simple compound degradation	Resource Acquisition:Substrate degradation:simple compound degradation:protein degradation	Resource Acquisition:Substrate degradation:simple compound degradation:protein degradation	production
661	hofD	('hofD')	count	NA	Resource Acquisition:Substrate degradation:simple compound degradation	Resource Acquisition:Substrate degradation:simple compound degradation:protein degradation	Resource Acquisition:Substrate degradation:simple compound degradation:protein degradation	production
662	pilD	('pilD')	count	NA	Resource Acquisition:Substrate degradation:simple compound degradation	Resource Acquisition:Substrate degradation:simple compound degradation:protein degradation	Resource Acquisition:Substrate degradation:simple compound degradation:protein degradation	production
663	lepB	('lepB')	count	NA	Resource Acquisition:Substrate degradation:simple compound degradation	Resource Acquisition:Substrate degradation:simple compound degradation:protein degradation	Resource Acquisition:Substrate degradation:simple compound degradation:protein degradation	production
664	lspA	('lspA')	count	NA	Resource Acquisition:Substrate degradation:simple compound degradation	Resource Acquisition:Substrate degradation:simple compound degradation:protein degradation	Resource Acquisition:Substrate degradation:simple compound degradation:protein degradation	production
665	psmA	('psmA')	count	NA	Resource Acquisition:Substrate degradation:simple compound degradation	Resource Acquisition:Substrate degradation:simple compound degradation:protein degradation	Resource Acquisition:Substrate degradation:simple compound degradation:protein degradation	production
666	psmB	('psmB')	count	NA	Resource Acquisition:Substrate degradation:simple compound degradation	Resource Acquisition:Substrate degradation:simple compound degradation:protein degradation	Resource Acquisition:Substrate degradation:simple compound degradation:protein degradation	production
667	hyaD	('hyaD')	count	NA	Resource Acquisition:Substrate degradation:simple compound degradation	Resource Acquisition:Substrate degradation:simple compound degradation:protein degradation	Resource Acquisition:Substrate degradation:simple compound degradation:protein degradation	production
668	prc	('prc')	count	NA	Resource Acquisition:Substrate degradation:simple compound degradation	Resource Acquisition:Substrate degradation:simple compound degradation:protein degradation	Resource Acquisition:Substrate degradation:simple compound degradation:protein degradation	production
669	hflB	('hflB')	count	NA	Resource Acquisition:Substrate degradation:simple compound degradation	Resource Acquisition:Substrate degradation:simple compound degradation:protein degradation	Resource Acquisition:Substrate degradation:simple compound degradation:protein degradation	production
670	lonB	('lonB')	count	NA	Resource Acquisition:Substrate degradation:simple compound degradation	Resource Acquisition:Substrate degradation:simple compound degradation:protein degradation	Resource Acquisition:Substrate degradation:simple compound degradation:protein degradation	production
671	hhoB	('hhoB')	count	NA	Resource Acquisition:Substrate degradation:simple compound degradation	Resource Acquisition:Substrate degradation:simple compound degradation:protein degradation	Resource Acquisition:Substrate degradation:simple compound degradation:protein degradation	production
672	lonH	('lonH')	count	NA	Resource Acquisition:Substrate degradation:simple compound degradation	Resource Acquisition:Substrate degradation:simple compound degradation:protein degradation	Resource Acquisition:Substrate degradation:simple compound degradation:protein degradation	production
673	degP	('degP')	count	NA	Resource Acquisition:Substrate degradation:simple compound degradation	Resource Acquisition:Substrate degradation:simple compound degradation:protein degradation	Resource Acquisition:Substrate degradation:simple compound degradation:protein degradation	production
674	degQ	('degQ')	count	NA	Resource Acquisition:Substrate degradation:simple compound degradation	Resource Acquisition:Substrate degradation:simple compound degradation:protein degradation	Resource Acquisition:Substrate degradation:simple compound degradation:protein degradation	production
675	sppA	('sppA')	count	NA	Resource Acquisition:Substrate degradation:simple compound degradation	Resource Acquisition:Substrate degradation:simple compound degradation:protein degradation	Resource Acquisition:Substrate degradation:simple compound degradation:protein degradation	production
676	sohB	('sohB')	count	NA	Resource Acquisition:Substrate degradation:simple compound degradation	Resource Acquisition:Substrate degradation:simple compound degradation:protein degradation	Resource Acquisition:Substrate degradation:simple compound degradation:protein degradation	production
677	ydgD	('ydgD')	count	NA	Resource Acquisition:Substrate degradation:simple compound degradation	Resource Acquisition:Substrate degradation:simple compound degradation:protein degradation	Resource Acquisition:Substrate degradation:simple compound degradation:protein degradation	production
678	pfpI	('pfpI')	count	NA	Resource Acquisition:Substrate degradation:simple compound degradation	Resource Acquisition:Substrate degradation:simple compound degradation:protein degradation	Resource Acquisition:Substrate degradation:simple compound degradation:protein degradation	production
[truncated: 297 more rows]

## Sheet: ST6.microtrait_substrate-torule
excel-sheetorder	microtrait_substrate-name	microtrait_substrate-subclass1	microtrait_substrate-subclass2	microtrait_substrate-subclass3	microtrait_trait-name1	microtrait_trait-name2	microtrait_trait-name3
[truncated: 173 more rows]

[truncated: 11 more sheets: ST7.microtrait_traits, ST8.microtrait_references, ST9.IMG_genomeset, ST10.IMG_genomeset_taxonomy, ST11.faprotax_FG-to-taxa, ST12.faprotax_taxa2genomes, ST13.FG Faprotax-vs-microTrait, ST14.faprotax_comparison, ST15.trait2trait_correlations, ST16.guilds2traitprofile, ST17.guilds2taxonomy]
